# Supplementary material
Source: publisher site journal article supplement (https://www.dovepress.com/get_supplementary_file.php?f=219699c.xlsx)
Supplement: Supplementary file 1 [file get_supplementary_file.php]

## Sheet: CTC KEGG
Term	Overlap	P-value	Adjusted P-value	Old P-value	Old Adjusted P-value	Z-score	Combined Score	Genes
Proteoglycans in cancer_Homo sapiens_hsa05205	10/203	1.51761e-07	2.17018e-05	2.53249e-07	3.62146e-05	-2.01334	31.6113	TIAM1;TGFB1;ITGB5;AKT2;MYC;ERBB2;TWIST1;MET;CD44;EGFR
Central carbon metabolism in cancer_Homo sapiens_hsa05230	1967-06-01	1.64629e-06	0.00011771	3.37556e-06	0.000241353	-1.85577	24.7132	PDGFRA;AKT2;MYC;ERBB2;MET;EGFR
Focal adhesion_Homo sapiens_hsa04510	8/202	1.39915e-05	0.00066693	2.21959e-05	0.001058	-1.87172	20.9203	PDGFRA;ITGB5;AKT2;ERBB2;TLN1;MET;EGFR;VCL
MicroRNAs in cancer_Homo sapiens_hsa05206	9/297	3.3657e-05	0.00120324	4.97864e-05	0.00177986	-1.83619	18.9115	PDGFRA;ZEB2;MYC;ERBB2;BMI1;MET;CD44;SERPINB5;EGFR
Pathways in cancer_Homo sapiens_hsa05200	10/397	5.82827e-05	0.00166688	8.18384e-05	0.00234058	-2.00301	19.5297	BMP4;PDGFRA;TGFB1;AKT2;MYC;DVL1;ERBB2;BIRC5;MET;EGFR
HTLV-I infection_Homo sapiens_hsa05166	8/258	7.96896e-05	0.00189927	0.000119367	0.00284491	-1.8181	17.1581	PDGFRA;TGFB1;RANBP3;PTTG1;AKT2;MYC;DVL1;TLN1
Rap1 signaling pathway_Homo sapiens_hsa04015	7/211	0.000149153	0.0029069	0.000225043	0.00459732	-1.8106	15.9523	PDGFRA;TIAM1;AKT2;TLN1;MET;EGFR;EPHA2
Endometrial cancer_Homo sapiens_hsa05213	1952-04-01	0.00017832	0.0029069	0.000290509	0.00461587	-1.70494	14.717	AKT2;MYC;ERBB2;EGFR
Hippo signaling pathway_Homo sapiens_hsa04390	6/153	0.000182952	0.0029069	0.000279907	0.00461587	-1.54404	13.2884	BMP4;TGFB1;MYC;DVL1;BIRC5;BMP6
Colorectal cancer_Homo sapiens_hsa05210	1962-04-01	0.00035254	0.00504132	0.000546642	0.00781699	-1.6505	13.1221	TGFB1;AKT2;MYC;BIRC5
Pancreatic cancer_Homo sapiens_hsa05212	1966-04-01	0.000448	0.005824	0.000683871	0.00889033	-1.64133	12.6559	TGFB1;AKT2;ERBB2;EGFR
Melanoma_Homo sapiens_hsa05218	1971-04-01	0.000591617	0.00705011	0.000887754	0.0105791	-1.58349	11.7695	PDGFRA;AKT2;MET;EGFR
Adherens junction_Homo sapiens_hsa04520	1974-04-01	0.000691976	0.00761173	0.00102884	0.0113172	-1.46733	10.6762	ERBB2;MET;EGFR;VCL
Signaling pathways regulating pluripotency of stem cells_Homo sapiens_hsa04550	5/142	0.00104303	0.0106152	0.00150601	0.0153768	-1.50453	10.3295	BMP4;AKT2;MYC;DVL1;BMI1
TGF-beta signaling pathway_Homo sapiens_hsa04350	1984-04-01	0.00111348	0.0106152	0.00161295	0.0153768	-1.45029	9.86238	BMP4;TGFB1;MYC;BMP6
Ras signaling pathway_Homo sapiens_hsa04014	6/227	0.00146265	0.0110084	0.0020809	0.0156615	-1.543	10.0719	PDGFRA;TIAM1;AKT2;MET;EGFR;EPHA2
Prostate cancer_Homo sapiens_hsa05215	1989-04-01	0.00138028	0.0110084	0.00197775	0.0156615	-1.49919	9.8729	PDGFRA;AKT2;ERBB2;EGFR
ErbB signaling pathway_Homo sapiens_hsa04012	1987-04-01	0.00126874	0.0110084	0.00182561	0.0156615	-1.45438	9.70032	AKT2;MYC;ERBB2;EGFR
Bladder cancer_Homo sapiens_hsa05219	1941-03-01	0.00140605	0.0110084	0.00204855	0.0156615	-1.0453	6.86446	MYC;ERBB2;EGFR
HIF-1 signaling pathway_Homo sapiens_hsa04066	4/103	0.00235946	0.0168701	0.0032969	0.0235728	-1.33222	8.05904	AKT2;ERBB2;TIMP1;EGFR
PI3K-Akt signaling pathway_Homo sapiens_hsa04151	7/341	0.0025235	0.0171838	0.00353077	0.0240428	-1.54851	9.26333	PDGFRA;ITGB5;AKT2;MYC;MET;EGFR;EPHA2
Non-small cell lung cancer_Homo sapiens_hsa05223	1956-03-01	0.00344824	0.0224136	0.00473419	0.0307723	-1.21276	6.87624	AKT2;ERBB2;EGFR
Glioma_Homo sapiens_hsa05214	1965-03-01	0.00524648	0.0326194	0.0070395	0.0436748	-1.28101	6.72555	PDGFRA;AKT2;EGFR
Renal cell carcinoma_Homo sapiens_hsa05211	1966-03-01	0.00547498	0.0326218	0.00733004	0.0436748	-1.09588	5.70686	TGFB1;AKT2;MET
Regulation of actin cytoskeleton_Homo sapiens_hsa04810	5/214	0.00612387	0.0350285	0.00832324	0.0476089	-1.32734	6.76352	PDGFRA;TIAM1;ITGB5;EGFR;VCL
Chronic myeloid leukemia_Homo sapiens_hsa05220	1973-03-01	0.00724183	0.03983	0.00956329	0.0525981	-1.11898	5.51418	TGFB1;AKT2;MYC
Hepatitis B_Homo sapiens_hsa05161	4/146	0.00812754	0.0430459	0.0108183	0.0572968	-1.27365	6.12945	TGFB1;AKT2;MYC;BIRC5
ECM-receptor interaction_Homo sapiens_hsa04512	1982-03-01	0.0099579	0.0508564	0.0129613	0.0661953	-0.892208	4.11254	ITGB5;CD47;CD44
MAPK signaling pathway_Homo sapiens_hsa04010	5/255	0.0124754	0.0615167	0.0166149	0.0819286	-1.28492	5.63306	PDGFRA;TGFB1;AKT2;MYC;EGFR
Choline metabolism in cancer_Homo sapiens_hsa05231	3/101	0.0174122	0.0803207	0.0221534	0.102192	-1.09377	4.43041	PDGFRA;AKT2;EGFR
Amoebiasis_Homo sapiens_hsa05146	3/100	0.0169602	0.0803207	0.0216002	0.102192	-1.05872	4.3163	TGFB1;MUC2;VCL
Thyroid hormone signaling pathway_Homo sapiens_hsa04919	3/118	0.0261233	0.113201	0.0327454	0.141897	-1.00291	3.65555	BMP4;AKT2;MYC
Drug metabolism - other enzymes_Homo sapiens_hsa00983	1946-02-01	0.025625	0.113201	0.0314411	0.140502	-0.303562	1.11231	TK1;UGT1A9
Notch signaling pathway_Homo sapiens_hsa04330	1948-02-01	0.0277342	0.116647	0.0338977	0.14257	-0.277161	0.993648	DLL4;DVL1
Malaria_Homo sapiens_hsa05144	1949-02-01	0.0288141	0.117726	0.0351534	0.143627	-0.379436	1.34582	TGFB1;MET
Cell cycle_Homo sapiens_hsa04110	3/124	0.0296618	0.117823	0.0370162	0.147037	-0.848405	2.9846	TGFB1;PTTG1;MYC
Vitamin B6 metabolism_Homo sapiens_hsa00750	2019-01-06	0.0319697	0.123558	0.040017	0.15466	5.63296	-19.3941	PSAT1
FoxO signaling pathway_Homo sapiens_hsa04068	3/133	0.0354202	0.130666	0.0439356	0.161097	-0.88593	2.95943	TGFB1;AKT2;EGFR
Basal cell carcinoma_Homo sapiens_hsa05217	1955-02-01	0.0356361	0.130666	0.0430571	0.161097	-0.260598	0.868938	BMP4;DVL1
Acute myeloid leukemia_Homo sapiens_hsa05221	1957-02-01	0.0380356	0.135977	0.0458267	0.163831	-0.433833	1.4183	AKT2;MYC
Phospholipase D signaling pathway_Homo sapiens_hsa04072	3/144	0.0431826	0.150613	0.0532123	0.185594	-0.877246	2.75658	PDGFRA;AKT2;EGFR
Shigellosis_Homo sapiens_hsa05131	1965-02-01	0.0482194	0.164176	0.0575319	0.195883	-0.261258	0.792132	CD44;VCL
Endocytosis_Homo sapiens_hsa04144	4/259	0.0519048	0.169866	0.065182	0.211841	-0.930867	2.75383	PDGFRA;TGFB1;MET;EGFR
Epithelial cell signaling in Helicobacter pylori infection_Homo sapiens_hsa05120	1968-02-01	0.0522665	0.169866	0.0621645	0.206733	-0.363683	1.07337	MET;EGFR
Cytokine-cytokine receptor interaction_Homo sapiens_hsa04060	4/265	0.0555649	0.176573	0.0696358	0.221287	-0.817213	2.36191	PDGFRA;TGFB1;MET;EGFR
Bacterial invasion of epithelial cells_Homo sapiens_hsa05100	1978-02-01	0.0665743	0.206959	0.0784697	0.243938	-0.382206	1.03556	MET;VCL
Calcium signaling pathway_Homo sapiens_hsa04020	3/180	0.0738902	0.216431	0.0894864	0.261154	-0.798332	2.07979	PDGFRA;ERBB2;EGFR
Transcriptional misregulation in cancer_Homo sapiens_hsa05202	3/180	0.0738902	0.216431	0.0894864	0.261154	-0.64263	1.67416	MYC;BMI1;MET
Hypertrophic cardiomyopathy (HCM)_Homo sapiens_hsa05410	1983-02-01	0.0741616	0.216431	0.0870768	0.261154	-0.278915	0.725601	TGFB1;ITGB5
Small cell lung cancer_Homo sapiens_hsa05222	1986-02-01	0.0788409	0.225485	0.092373	0.263879	-0.358533	0.910789	AKT2;MYC
Gap junction_Homo sapiens_hsa04540	1988-02-01	0.0820108	0.22553	0.0959559	0.263879	-0.316855	0.792424	PDGFRA;EGFR
Hematopoietic cell lineage_Homo sapiens_hsa04640	1988-02-01	0.0820108	0.22553	0.0959559	0.263879	-0.2959	0.740017	CD9;CD44
Dilated cardiomyopathy_Homo sapiens_hsa05414	1990-02-01	0.0852196	0.229932	0.0995788	0.268675	-0.323217	0.79593	TGFB1;ITGB5
Epstein-Barr virus infection_Homo sapiens_hsa05169	3/202	0.0963142	0.255054	0.115653	0.302488	-0.638901	1.49512	AKT2;MYC;CD44
Estrogen signaling pathway_Homo sapiens_hsa04915	1999-02-01	0.100109	0.260282	0.116342	0.302488	-0.402827	0.927107	AKT2;EGFR
AGE-RAGE signaling pathway in diabetic complications_Homo sapiens_hsa04933	2/101	0.10351	0.264321	0.120161	0.30684	-0.488703	1.10842	TGFB1;AKT2
Chagas disease (American trypanosomiasis)_Homo sapiens_hsa05142	2/104	0.108672	0.272633	0.125949	0.315979	-0.3103	0.688686	TGFB1;AKT2
Toxoplasmosis_Homo sapiens_hsa05145	2/118	0.133594	0.324356	0.153788	0.366528	-0.343618	0.691685	TGFB1;AKT2
Dorso-ventral axis formation_Homo sapiens_hsa04320	2019-01-27	0.136093	0.324356	0.150921	0.365792	1.96969	-3.92838	EGFR
Ascorbate and aldarate metabolism_Homo sapiens_hsa00053	2019-01-27	0.136093	0.324356	0.150921	0.365792	2.9934	-5.97007	UGT1A9
Platelet activation_Homo sapiens_hsa04611	2/122	0.140937	0.330393	0.161957	0.373547	-0.332967	0.65243	AKT2;TLN1
Thyroid cancer_Homo sapiens_hsa05216	2019-01-29	0.145411	0.335384	0.160807	0.373547	1.89654	-3.65689	MYC
Axon guidance_Homo sapiens_hsa04360	2/127	0.150235	0.341009	0.172281	0.391051	-0.183573	0.347972	MET;EPHA2
Osteoclast differentiation_Homo sapiens_hsa04380	2/132	0.159652	0.354789	0.182716	0.400432	-0.233579	0.428562	TGFB1;AKT2
Hepatitis C_Homo sapiens_hsa05160	2/133	0.161548	0.354789	0.184815	0.400432	-0.195777	0.356892	AKT2;EGFR
Base excision repair_Homo sapiens_hsa03410	1933-01-01	0.163749	0.354789	0.180242	0.400432	2.47355	-4.47569	HMGB1
Apoptosis_Homo sapiens_hsa04210	2/140	0.174936	0.370545	0.199606	0.41976	-0.264842	0.461707	AKT2;BIRC5
Wnt signaling pathway_Homo sapiens_hsa04310	2/142	0.178794	0.370545	0.20386	0.422493	-0.152689	0.262857	MYC;DVL1
Pentose and glucuronate interconversions_Homo sapiens_hsa00040	1936-01-01	0.177246	0.370545	0.19453	0.415191	2.55993	-4.42924	UGT1A9
Non-alcoholic fatty liver disease (NAFLD)_Homo sapiens_hsa04932	2/151	0.196309	0.395384	0.223132	0.437094	-0.154843	0.252095	TGFB1;AKT2
Glycine, serine and threonine metabolism_Homo sapiens_hsa00260	1940-01-01	0.194907	0.395384	0.213203	0.435543	2.17103	-3.55014	PSAT1
Fat digestion and absorption_Homo sapiens_hsa04975	1941-01-01	0.199263	0.395759	0.217804	0.437094	2.05237	-3.31075	FABP1
Porphyrin and chlorophyll metabolism_Homo sapiens_hsa00860	1942-01-01	0.203596	0.398825	0.22238	0.437094	2.14823	-3.41917	UGT1A9
Jak-STAT signaling pathway_Homo sapiens_hsa04630	2/158	0.210077	0.40596	0.238232	0.454228	-0.0749384	0.116925	AKT2;MYC
Carbohydrate digestion and absorption_Homo sapiens_hsa04973	1945-01-01	0.216456	0.412709	0.235951	0.454228	1.7348	-2.65488	AKT2
Intestinal immune network for IgA production_Homo sapiens_hsa04672	1948-01-01	0.22911	0.431088	0.24929	0.469044	1.74542	-2.57197	TGFB1
Vibrio cholerae infection_Homo sapiens_hsa05110	1951-01-01	0.241561	0.43179	0.262402	0.469044	1.60433	-2.27916	MUC2
Ovarian steroidogenesis_Homo sapiens_hsa04913	1950-01-01	0.237433	0.43179	0.258056	0.469044	1.59014	-2.28641	BMP6
Hedgehog signaling pathway_Homo sapiens_hsa04340	1950-01-01	0.237433	0.43179	0.258056	0.469044	1.67842	-2.41335	BMP4
Mineral absorption_Homo sapiens_hsa04978	1951-01-01	0.241561	0.43179	0.262402	0.469044	1.7422	-2.47503	SLC26A3
Glutathione metabolism_Homo sapiens_hsa00480	1952-01-01	0.245667	0.433709	0.266723	0.470881	1.81625	-2.54961	GPX2
Tuberculosis_Homo sapiens_hsa05152	2/178	0.249856	0.435724	0.281626	0.483069	0.168948	-0.234309	TGFB1;AKT2
Regulation of lipolysis in adipocytes_Homo sapiens_hsa04923	1956-01-01	0.261872	0.445806	0.283761	0.483069	1.26615	-1.69652	AKT2
Starch and sucrose metabolism_Homo sapiens_hsa00500	1956-01-01	0.261872	0.445806	0.283761	0.483069	1.65525	-2.21787	UGT1A9
Chemokine signaling pathway_Homo sapiens_hsa04062	2/187	0.26786	0.448696	0.301155	0.484525	0.250655	-0.330185	TIAM1;AKT2
Steroid hormone biosynthesis_Homo sapiens_hsa00140	1958-01-01	0.269845	0.448696	0.292134	0.484525	1.66073	-2.17541	UGT1A9
cAMP signaling pathway_Homo sapiens_hsa04024	2/199	0.291859	0.450286	0.327078	0.484525	0.355896	-0.438281	TIAM1;AKT2
Fc epsilon RI signaling pathway_Homo sapiens_hsa04664	1968-01-01	0.308447	0.450286	0.332589	0.484525	1.24926	-1.46939	AKT2
B cell receptor signaling pathway_Homo sapiens_hsa04662	1973-01-01	0.326982	0.450286	0.351962	0.484525	1.36991	-1.53136	AKT2
Prolactin signaling pathway_Homo sapiens_hsa04917	1972-01-01	0.323315	0.450286	0.348132	0.484525	1.37685	-1.55465	AKT2
Leishmaniasis_Homo sapiens_hsa05140	1973-01-01	0.326982	0.450286	0.351962	0.484525	1.47437	-1.64812	TGFB1
Adipocytokine signaling pathway_Homo sapiens_hsa04920	1970-01-01	0.315921	0.450286	0.340405	0.484525	1.44364	-1.66346	AKT2
mTOR signaling pathway_Homo sapiens_hsa04150	1960-01-01	0.277732	0.450286	0.300412	0.484525	1.30502	-1.67186	AKT2
VEGF signaling pathway_Homo sapiens_hsa04370	1961-01-01	0.281644	0.450286	0.304515	0.484525	1.32824	-1.68303	AKT2
Longevity regulating pathway - multiple species_Homo sapiens_hsa04213	1964-01-01	0.293255	0.450286	0.316685	0.484525	1.39719	-1.71395	AKT2
Biosynthesis of amino acids_Homo sapiens_hsa01230	1974-01-01	0.33063	0.450286	0.35577	0.484525	1.57704	-1.7454	PSAT1
Drug metabolism - cytochrome P450_Homo sapiens_hsa00982	1969-01-01	0.312194	0.450286	0.336508	0.484525	1.50962	-1.75739	UGT1A9
p53 signaling pathway_Homo sapiens_hsa04115	1969-01-01	0.312194	0.450286	0.336508	0.484525	1.51906	-1.76838	SERPINB5
Thyroid hormone synthesis_Homo sapiens_hsa04918	1971-01-01	0.319628	0.450286	0.34428	0.484525	1.55921	-1.77843	GPX2
Metabolism of xenobiotics by cytochrome P450_Homo sapiens_hsa00980	1973-01-01	0.326982	0.450286	0.351962	0.484525	1.60523	-1.79441	UGT1A9
PPAR signaling pathway_Homo sapiens_hsa03320	1969-01-01	0.312194	0.450286	0.336508	0.484525	1.54362	-1.79698	FABP1
Retinol metabolism_Homo sapiens_hsa00830	1965-01-01	0.297083	0.450286	0.320696	0.484525	1.54191	-1.87148	UGT1A9
Inflammatory bowel disease (IBD)_Homo sapiens_hsa05321	1965-01-01	0.297083	0.450286	0.320696	0.484525	1.56496	-1.89946	TGFB1
Arrhythmogenic right ventricular cardiomyopathy (ARVC)_Homo sapiens_hsa05412	1974-01-01	0.33063	0.450286	0.35577	0.484525	1.73739	-1.92287	ITGB5
Arachidonic acid metabolism_Homo sapiens_hsa00590	1962-01-01	0.285535	0.450286	0.308595	0.484525	1.72368	-2.16045	GPX2
Complement and coagulation cascades_Homo sapiens_hsa04610	1979-01-01	0.348576	0.470249	0.374486	0.505202	1.59977	-1.68599	CLU
Chemical carcinogenesis_Homo sapiens_hsa05204	1982-01-01	0.359114	0.479938	0.385459	0.515147	1.49432	-1.53035	UGT1A9
GnRH signaling pathway_Homo sapiens_hsa04912	1991-01-01	0.389726	0.506643	0.417266	0.542445	1.27334	-1.19989	EGFR
Rheumatoid arthritis_Homo sapiens_hsa05323	1990-01-01	0.386397	0.506643	0.413812	0.542445	1.31792	-1.2532	TGFB1
Salivary secretion_Homo sapiens_hsa04970	1989-01-01	0.383051	0.506643	0.410339	0.542445	1.33084	-1.27706	AQP5
Fc gamma R-mediated phagocytosis_Homo sapiens_hsa04666	1993-01-01	0.396329	0.510209	0.424112	0.545834	1.26157	-1.1676	AKT2
Longevity regulating pathway - mammal_Homo sapiens_hsa04211	1994-01-01	0.399604	0.510209	0.427506	0.545834	1.30413	-1.19626	AKT2
Pancreatic secretion_Homo sapiens_hsa04972	1996-01-01	0.406101	0.513916	0.434236	0.549519	1.35993	-1.22551	SLC26A3
Progesterone-mediated oocyte maturation_Homo sapiens_hsa04914	1998-01-01	0.412529	0.517471	0.440888	0.553043	1.22131	-1.08141	AKT2
Melanogenesis_Homo sapiens_hsa04916	1/100	0.418888	0.520275	0.447464	0.555633	1.28072	-1.11442	DVL1
Glucagon signaling pathway_Homo sapiens_hsa04922	1/101	0.422042	0.520275	0.450723	0.555633	1.30484	-1.12562	AKT2
Toll-like receptor signaling pathway_Homo sapiens_hsa04620	1/106	0.437558	0.525805	0.466742	0.560874	1.30621	-1.07965	AKT2
T cell receptor signaling pathway_Homo sapiens_hsa04660	1/104	0.431402	0.525805	0.46039	0.560874	1.32822	-1.11665	AKT2
Pyrimidine metabolism_Homo sapiens_hsa00240	1/105	0.434488	0.525805	0.463575	0.560874	1.40411	-1.17044	TK1
Insulin resistance_Homo sapiens_hsa04931	1/109	0.446669	0.528857	0.476133	0.56324	1.29288	-1.04198	AKT2
TNF signaling pathway_Homo sapiens_hsa04668	1/110	0.449673	0.528857	0.479228	0.56324	1.31626	-1.052	AKT2
Cholinergic synapse_Homo sapiens_hsa04725	1/111	0.452661	0.528857	0.482304	0.56324	1.39386	-1.10479	AKT2
Carbon metabolism_Homo sapiens_hsa01200	1/113	0.45859	0.528857	0.488404	0.56324	1.4701	-1.14609	PSAT1
Serotonergic synapse_Homo sapiens_hsa04726	1/112	0.455634	0.528857	0.485363	0.56324	1.47848	-1.16218	APP
Neurotrophin signaling pathway_Homo sapiens_hsa04722	1/120	0.478842	0.539169	0.509207	0.573359	1.4335	-1.05561	AKT2
Sphingolipid signaling pathway_Homo sapiens_hsa04071	1/120	0.478842	0.539169	0.509207	0.573359	1.45785	-1.07354	AKT2
Leukocyte transendothelial migration_Homo sapiens_hsa04670	1/118	0.473133	0.539169	0.503349	0.573359	1.45295	-1.08736	VCL
AMPK signaling pathway_Homo sapiens_hsa04152	1/124	0.490076	0.543262	0.520722	0.577234	1.48354	-1.05805	AKT2
Oocyte meiosis_Homo sapiens_hsa04114	1/123	0.48729	0.543262	0.517868	0.577234	1.48094	-1.06464	PTTG1
Dopaminergic synapse_Homo sapiens_hsa04728	1/129	0.503781	0.554159	0.534745	0.588219	1.55029	-1.0629	AKT2
Measles_Homo sapiens_hsa05162	1/136	0.522358	0.565711	0.553707	0.59932	1.42115	-0.922896	AKT2
Tight junction_Homo sapiens_hsa04530	1/139	0.530107	0.565711	0.5616	0.59932	1.4696	-0.932723	AKT2
Insulin signaling pathway_Homo sapiens_hsa04910	1/139	0.530107	0.565711	0.5616	0.59932	1.47396	-0.935487	AKT2
Ubiquitin mediated proteolysis_Homo sapiens_hsa04120	1/137	0.524955	0.565711	0.556353	0.59932	1.47042	-0.947599	UBE2C
Adrenergic signaling in cardiomyocytes_Homo sapiens_hsa04261	1/148	0.552614	0.585361	0.584473	0.619108	1.48838	-0.88275	AKT2
Phagosome_Homo sapiens_hsa04145	1/154	0.567022	0.596207	0.59907	0.629905	1.53422	-0.87045	ITGB5
Oxytocin signaling pathway_Homo sapiens_hsa04921	1/158	0.576371	0.601613	0.608522	0.635173	1.58339	-0.872454	EGFR
Alzheimer's disease_Homo sapiens_hsa05010	1/168	0.598877	0.616111	0.631212	0.649376	1.61239	-0.826671	APP
cGMP-PKG signaling pathway_Homo sapiens_hsa04022	1/167	0.596681	0.616111	0.629002	0.649376	1.61927	-0.836147	AKT2
Purine metabolism_Homo sapiens_hsa00230	1/176	0.616026	0.624764	0.648435	0.657633	1.53838	-0.745295	PDE6D
Influenza A_Homo sapiens_hsa05164	1/175	0.613923	0.624764	0.646326	0.657633	1.62922	-0.794873	AKT2
Neuroactive ligand-receptor interaction_Homo sapiens_hsa04080	1/277	0.779162	0.784649	0.808723	0.814418	1.51298	-0.377542	CHRNB1
Metabolic pathways_Homo sapiens_hsa01100	3/1239	0.966965	0.966965	0.983464	0.983464	1.51468	-0.0508821	PSAT1;TK1;UGT1A9

## Sheet: CTC panter
Term	Overlap	P-value	Adjusted P-value	Old P-value	Old Adjusted P-value	Z-score	Combined Score	Genes
Angiogenesis_Homo sapiens_P00005	5/142	0.00104303	0.0316544	0.0240539	0.444835	-1.66229	11.4127	DLL4;PDGFRA;AKT2;DVL1;BIRC5
Alzheimer disease-presenilin pathway_Homo sapiens_P00004	1999-04-01	0.00204222	0.0316544	0.0286991	0.444835	-1.48952	9.22564	APP;MMP13;DVL1;CD44
p53 pathway_Homo sapiens_P00059	1971-03-01	0.00670675	0.0693031	0.0521074	0.538444	-1.32808	6.64656	AKT2;HMGB1;SERPINB5
Integrin signalling pathway_Homo sapiens_P00034	4/156	0.0101974	0.07903	0.109396	0.564903	-1.49454	6.85338	ITGB5;TLN1;VCL;LIMS1
EGF receptor signaling pathway_Homo sapiens_P00018	3/109	0.0212693	0.108926	0.137627	0.564903	-1.37533	5.29569	AKT2;ERBB2;EGFR
PDGF signaling pathway_Homo sapiens_P00047	3/112	0.0228267	0.108926	0.145782	0.564903	-1.1721	4.43032	PDGFRA;AKT2;MYC
p53 pathway feedback loops 2_Homo sapiens_P04398	1945-02-01	0.0245963	0.108926	0.101965	0.564903	-0.92814	3.43891	AKT2;MYC
Serine glycine biosynthesis_Homo sapiens_P02776	2019-01-06	0.0319697	0.123883	0.078684	0.564903	2.27003	-7.81565	PSAT1
Interleukin signaling pathway_Homo sapiens_P00036	1986-02-01	0.0788409	0.231121	0.272693	0.623286	-0.742798	1.88695	AKT2;MYC
TGF-beta signaling pathway_Homo sapiens_P00052	1988-02-01	0.0820108	0.231121	0.281484	0.623286	-0.481724	1.20475	BMP4;BMP6
Plasminogen activating cascade_Homo sapiens_P00050	2019-01-15	0.078035	0.231121	0.171163	0.589563	1.68544	-4.29889	MMP13
Oxidative stress response_Homo sapiens_P00046	2019-01-24	0.121928	0.269982	0.254709	0.623286	0.924037	-1.94448	MYC
Hypoxia response via HIF activation_Homo sapiens_P00030	2019-01-24	0.121928	0.269982	0.254709	0.623286	0.955651	-2.011	AKT2
p53 pathway by glucose deprivation_Homo sapiens_P04397	2019-01-21	0.107532	0.269982	0.2278	0.623286	0.984892	-2.19628	AKT2
Cadherin signaling pathway_Homo sapiens_P00012	2/150	0.194352	0.322254	0.537278	0.71002	-0.0320288	0.0524659	ERBB2;EGFR
Insulin/IGF pathway-protein kinase B signaling cascade_Homo sapiens_P00033	1934-01-01	0.168272	0.322254	0.338065	0.661416	0.516533	-0.920551	AKT2
PI3 kinase pathway_Homo sapiens_P00048	1942-01-01	0.203596	0.322254	0.398241	0.661416	0.632192	-1.00621	AKT2
Blood coagulation_Homo sapiens_P00011	1938-01-01	0.186124	0.322254	0.36884	0.661416	0.605233	-1.0176	APP
Notch signaling pathway_Homo sapiens_P00045	1938-01-01	0.186124	0.322254	0.36884	0.661416	0.775883	-1.30453	DLL4
Ubiquitin proteasome pathway_Homo sapiens_P00060	1943-01-01	0.207906	0.322254	0.405384	0.661416	0.872003	-1.36963	UBE2C
CCKR signaling map ST_Homo sapiens_P06959	2/165	0.223941	0.330579	0.59029	0.71002	0.115748	-0.173202	MYC;CLU
Alzheimer disease-amyloid secretase pathway_Homo sapiens_P00003	1956-01-01	0.261872	0.369002	0.491153	0.71002	0.684544	-0.91722	APP
Nicotinic acetylcholine receptor signaling pathway_Homo sapiens_P00044	1968-01-01	0.308447	0.398538	0.559699	0.71002	0.661811	-0.778427	CHRNB1
Ras Pathway_Homo sapiens_P04393	1969-01-01	0.312194	0.398538	0.564994	0.71002	0.708051	-0.824265	TIAM1
Endothelin signaling pathway_Homo sapiens_P00019	1975-01-01	0.334258	0.398538	0.5955	0.71002	0.767348	-0.840893	AKT2
T cell activation_Homo sapiens_P00053	1973-01-01	0.326982	0.398538	0.585567	0.71002	0.783736	-0.876099	AKT2
FGF signaling pathway_Homo sapiens_P00021	1999-01-01	0.415717	0.470733	0.698253	0.785164	0.944791	-0.829291	AKT2
Apoptosis signaling pathway_Homo sapiens_P00006	1/102	0.425178	0.470733	0.709181	0.785164	1.06097	-0.907392	AKT2
Wnt signaling pathway_Homo sapiens_P00057	2/278	0.444194	0.474828	0.857259	0.885835	0.916154	-0.743454	MYC;DVL1
Huntington disease_Homo sapiens_P00029	1/124	0.490076	0.506412	0.778491	0.83218	1.14115	-0.813866	AKT2
Inflammation mediated by chemokine and cytokine signaling pathway_Homo sapiens_P00031	1/188	0.640396	0.640396	0.90146	0.90146	1.18563	-0.528399	AKT2

## Sheet: CTC Reactome
Term	Overlap	P-value	Adjusted P-value	Old P-value	Old Adjusted P-value	Z-score	Combined Score	Genes
Platelet degranulation_Homo sapiens_R-HSA-114608	7/105	1.62149e-06	0.000412454	9.90817e-07	0.00024777	-1.92413	25.6528	APP;TGFB1;CD9;TIMP1;TLN1;CLU;VCL
Response to elevated platelet cytosolic Ca2+_Homo sapiens_R-HSA-76005	7/110	2.2175e-06	0.000412454	1.3321e-06	0.00024777	-1.89654	24.6913	APP;TGFB1;CD9;TIMP1;TLN1;CLU;VCL
Platelet activation, signaling and aggregation_Homo sapiens_R-HSA-76002	8/253	6.95173e-05	0.00649292	3.17618e-05	0.00393846	-2.14447	20.531	APP;TGFB1;AKT2;CD9;TIMP1;TLN1;CLU;VCL
Elastic fibre formation_Homo sapiens_R-HSA-1566948	1941-04-01	6.98163e-05	0.00649292	6.35198e-05	0.00512152	-1.93801	18.5461	BMP4;TGFB1;ITGB5;LOXL3
Defective GALNT12 causes colorectal cancer 1 (CRCS1)_Homo sapiens_R-HSA-5083636	2019-03-18	0.000117792	0.00730308	0.000135612	0.00720683	-1.99	18.0027	MUC1;MUC2;MUC13
Defective GALNT3 causes familial hyperphosphatemic tumoral calcinosis (HFTC)_Homo sapiens_R-HSA-5083625	2019-03-18	0.000117792	0.00730308	0.000135612	0.00720683	-1.95604	17.6955	MUC1;MUC2;MUC13
Extracellular matrix organization_Homo sapiens_R-HSA-1474244	8/283	0.000150947	0.00759218	6.88376e-05	0.00512152	-2.06438	18.1636	BMP4;TGFB1;MMP13;ITGB5;LOXL3;CD47;TIMP1;CD44
Defective C1GALT1C1 causes Tn polyagglutination syndrome (TNPS)_Homo sapiens_R-HSA-5083632	2019-03-20	0.000163273	0.00759218	0.000179352	0.00833986	-1.94846	16.9907	MUC1;MUC2;MUC13
Termination of O-glycan biosynthesis_Homo sapiens_R-HSA-977068	2019-03-26	0.000363702	0.015033	0.00036256	0.0134872	-2.04373	16.1847	MUC1;MUC2;MUC13
Molecules associated with elastic fibres_Homo sapiens_R-HSA-2129379	2019-03-30	0.00055909	0.0207981	0.000534039	0.0165552	-1.82504	13.6681	BMP4;TGFB1;ITGB5
Hemostasis_Homo sapiens_R-HSA-109582	10/552	0.000813329	0.0216113	0.000294066	0.0121547	-2.04385	14.5407	APP;TGFB1;AKT2;CD9;CD47;TIMP1;TLN1;CLU;CD44;VCL
Smooth Muscle Contraction_Homo sapiens_R-HSA-445355	1933-03-01	0.000742543	0.0216113	0.000691774	0.0183814	-1.78609	12.8695	ITGB5;TLN1;VCL
Insulin-like Growth Factor-2 mRNA Binding Proteins (IGF2BPs/IMPs/VICKZs) bind RNA_Homo sapiens_R-HSA-428359	2019-02-08	0.000791977	0.0216113	0.00102155	0.0211121	-1.02967	7.35289	MYC;CD44
Regulation of cytoskeletal remodeling and cell spreading by IPP complex components_Homo sapiens_R-HSA-446388	2019-02-08	0.000791977	0.0216113	0.00102155	0.0211121	-1.00551	7.18035	RSU1;LIMS1
Diseases of signal transduction_Homo sapiens_R-HSA-5663202	7/288	0.000964438	0.0239181	0.000505845	0.0165552	-2.30332	15.9941	DLL4;PDGFRA;TGFB1;AKT2;MYC;ERBB2;EGFR
PI3K/AKT Signaling in Cancer_Homo sapiens_R-HSA-2219528	1986-04-01	0.0012154	0.0282581	0.000928796	0.0211121	-1.799	12.0761	PDGFRA;AKT2;ERBB2;EGFR
Negative regulation of the PI3K/AKT network_Homo sapiens_R-HSA-199418	1990-04-01	0.00143854	0.0314786	0.0010929	0.0213979	-1.99652	13.0655	PDGFRA;AKT2;ERBB2;EGFR
Disease_Homo sapiens_R-HSA-1643685	11/725	0.00186898	0.0335984	0.000624746	0.0178773	-2.23245	14.0251	DLL4;PDGFRA;MUC1;TGFB1;MUC2;AKT2;MYC;ERBB2;CD9;MUC13;EGFR
Axon guidance_Homo sapiens_R-HSA-422475	9/515	0.00190402	0.0335984	0.00080325	0.0199206	-2.19822	13.7692	PDGFRA;TIAM1;ERBB2;TLN1;MET;EGFR;VCL;EPHA2;CAP2
Signaling by ERBB2_Homo sapiens_R-HSA-1227986	1945-03-01	0.00184261	0.0335984	0.0016088	0.0272034	-1.88596	11.8751	AKT2;ERBB2;EGFR
ERBB2 Activates PTK6 Signaling_Homo sapiens_R-HSA-8847993	2019-02-13	0.00216764	0.0335984	0.00234695	0.0294795	-1.37219	8.41719	ERBB2;EGFR
DEx/H-box helicases activate type I IFN and inflammatory cytokines production_Homo sapiens_R-HSA-3134963	2019-02-13	0.00216764	0.0335984	0.00234695	0.0294795	-1.32942	8.15484	APP;HMGB1
Downregulation of ERBB2:ERBB3 signaling_Homo sapiens_R-HSA-1358803	2019-02-13	0.00216764	0.0335984	0.00234695	0.0294795	-1.2201	7.48423	AKT2;ERBB2
Advanced glycosylation endproduct receptor signaling_Homo sapiens_R-HSA-879415	2019-02-13	0.00216764	0.0335984	0.00234695	0.0294795	-1.21904	7.47772	APP;HMGB1
Signalling by NGF_Homo sapiens_R-HSA-166520	8/450	0.00305958	0.0376373	0.00146686	0.0259844	-2.2683	13.1323	PDGFRA;TIAM1;AKT2;ERBB2;TLN1;ECT2;EGFR;VCL
Developmental Biology_Homo sapiens_R-HSA-1266738	11/786	0.00348046	0.0376373	0.00121439	0.0225877	-2.12813	12.0465	PDGFRA;TIAM1;TGFB1;AKT2;ERBB2;TLN1;MET;EGFR;VCL;EPHA2;CAP2
MAPK family signaling cascades_Homo sapiens_R-HSA-5683057	6/284	0.00444516	0.0376373	0.00265061	0.0294795	-2.21132	11.9764	PDGFRA;MYC;ERBB2;TLN1;EGFR;VCL
IRS-mediated signalling_Homo sapiens_R-HSA-112399	6/284	0.00444516	0.0376373	0.00265061	0.0294795	-2.20112	11.9211	PDGFRA;AKT2;ERBB2;TLN1;EGFR;VCL
Insulin receptor signalling cascade_Homo sapiens_R-HSA-74751	6/287	0.00467628	0.0376373	0.00279039	0.0294795	-2.17153	11.6508	PDGFRA;AKT2;ERBB2;TLN1;EGFR;VCL
IGF1R signaling cascade_Homo sapiens_R-HSA-2428924	6/288	0.00475525	0.0376373	0.0028382	0.0294795	-2.1671	11.5907	PDGFRA;AKT2;ERBB2;TLN1;EGFR;VCL
IRS-related events triggered by IGF1R_Homo sapiens_R-HSA-2428928	6/288	0.00475525	0.0376373	0.0028382	0.0294795	-2.15709	11.5372	PDGFRA;AKT2;ERBB2;TLN1;EGFR;VCL
Signaling by Type 1 Insulin-like Growth Factor 1 Receptor (IGF1R)_Homo sapiens_R-HSA-2404192	6/288	0.00475525	0.0376373	0.0028382	0.0294795	-2.14787	11.4879	PDGFRA;AKT2;ERBB2;TLN1;EGFR;VCL
PI-3K cascade:FGFR1_Homo sapiens_R-HSA-5654689	4/122	0.00433565	0.0376373	0.00320376	0.0294795	-1.91929	10.4426	PDGFRA;AKT2;ERBB2;EGFR
PI-3K cascade:FGFR2_Homo sapiens_R-HSA-5654695	4/122	0.00433565	0.0376373	0.00320376	0.0294795	-1.91122	10.3987	PDGFRA;AKT2;ERBB2;EGFR
PI-3K cascade:FGFR3_Homo sapiens_R-HSA-5654710	4/122	0.00433565	0.0376373	0.00320376	0.0294795	-1.90212	10.3492	PDGFRA;AKT2;ERBB2;EGFR
PI-3K cascade:FGFR4_Homo sapiens_R-HSA-5654720	4/122	0.00433565	0.0376373	0.00320376	0.0294795	-1.89448	10.3076	PDGFRA;AKT2;ERBB2;EGFR
PI3K events in ERBB4 signaling_Homo sapiens_R-HSA-1250342	4/122	0.00433565	0.0376373	0.00320376	0.0294795	-1.8829	10.2446	PDGFRA;AKT2;ERBB2;EGFR
PIP3 activates AKT signaling_Homo sapiens_R-HSA-1257604	4/122	0.00433565	0.0376373	0.00320376	0.0294795	-1.87731	10.2142	PDGFRA;AKT2;ERBB2;EGFR
GAB1 signalosome_Homo sapiens_R-HSA-180292	4/125	0.0047254	0.0376373	0.00348683	0.0294795	-1.87636	10.0475	PDGFRA;AKT2;ERBB2;EGFR
PI3K/AKT activation_Homo sapiens_R-HSA-198203	4/125	0.0047254	0.0376373	0.00348683	0.0294795	-1.86336	9.97794	PDGFRA;AKT2;ERBB2;EGFR
Constitutive Signaling by Aberrant PI3K in Cancer_Homo sapiens_R-HSA-2219530	1961-03-01	0.00439063	0.0376373	0.00367075	0.0303449	-1.60458	8.71014	PDGFRA;ERBB2;EGFR
ERBB2 Regulates Cell Motility_Homo sapiens_R-HSA-6785631	2019-02-15	0.00289749	0.0376373	0.00302109	0.0294795	-1.47653	8.62874	ERBB2;EGFR
Diseases associated with O-glycosylation of proteins_Homo sapiens_R-HSA-3906995	1962-03-01	0.00459596	0.0376373	0.00383536	0.0309488	-1.50689	8.11093	MUC1;MUC2;MUC13
PI3K events in ERBB2 signaling_Homo sapiens_R-HSA-1963642	2019-02-16	0.00329977	0.0376373	0.00338821	0.0294795	-1.39286	7.95866	ERBB2;EGFR
SHC1 events in ERBB2 signaling_Homo sapiens_R-HSA-1250196	2019-02-18	0.00417771	0.0376373	0.00418162	0.0309488	-1.41594	7.7565	ERBB2;EGFR
GRB2 events in ERBB2 signaling_Homo sapiens_R-HSA-1963640	2019-02-16	0.00329977	0.0376373	0.00338821	0.0294795	-1.33184	7.60999	ERBB2;EGFR
Cell-extracellular matrix interactions_Homo sapiens_R-HSA-446353	2019-02-16	0.00329977	0.0376373	0.00338821	0.0294795	-1.10385	6.30728	RSU1;LIMS1
Syndecan interactions_Homo sapiens_R-HSA-3000170	2019-02-20	0.00515165	0.0399253	0.00505262	0.0309488	-1.01602	5.35282	TGFB1;ITGB5
O-linked glycosylation of mucins_Homo sapiens_R-HSA-913709	1966-03-01	0.00547498	0.040844	0.00453863	0.0309488	-1.57777	8.21636	MUC1;MUC2;MUC13
Integrin cell surface interactions_Homo sapiens_R-HSA-216083	1967-03-01	0.00570938	0.040844	0.00472583	0.0309488	-1.48893	7.69129	ITGB5;CD47;CD44
Semaphorin interactions_Homo sapiens_R-HSA-373755	1967-03-01	0.00570938	0.040844	0.00472583	0.0309488	-1.41251	7.29653	ERBB2;TLN1;MET
RIP-mediated NFkB activation via ZBP1_Homo sapiens_R-HSA-1810476	2019-02-21	0.00567395	0.040844	0.00551674	0.0309488	-0.945128	4.88808	APP;HMGB1
Signaling by Insulin receptor_Homo sapiens_R-HSA-74752	6/311	0.00685654	0.0455762	0.00411783	0.0309488	-2.06682	10.298	PDGFRA;AKT2;ERBB2;TLN1;EGFR;VCL
VEGFA-VEGFR2 Pathway_Homo sapiens_R-HSA-4420097	6/320	0.00783874	0.0455762	0.00472063	0.0309488	-2.03956	9.88916	PDGFRA;AKT2;ERBB2;TLN1;EGFR;VCL
Signaling by SCF-KIT_Homo sapiens_R-HSA-1433557	6/325	0.00842635	0.0455762	0.00508257	0.0309488	-2.06283	9.85286	PDGFRA;AKT2;ERBB2;TLN1;EGFR;VCL
Downstream signaling of activated FGFR2_Homo sapiens_R-HSA-5654696	6/329	0.00891878	0.0455762	0.0053866	0.0309488	-2.04397	9.64673	PDGFRA;AKT2;ERBB2;TLN1;EGFR;VCL
Downstream signaling of activated FGFR3_Homo sapiens_R-HSA-5654708	6/329	0.00891878	0.0455762	0.0053866	0.0309488	-2.03632	9.6106	PDGFRA;AKT2;ERBB2;TLN1;EGFR;VCL
Downstream signaling of activated FGFR4_Homo sapiens_R-HSA-5654716	6/329	0.00891878	0.0455762	0.0053866	0.0309488	-2.02594	9.56164	PDGFRA;AKT2;ERBB2;TLN1;EGFR;VCL
Signaling by VEGF_Homo sapiens_R-HSA-194138	6/328	0.00879378	0.0455762	0.00530936	0.0309488	-1.98846	9.41277	PDGFRA;AKT2;ERBB2;TLN1;EGFR;VCL
Signaling by ERBB4_Homo sapiens_R-HSA-1236394	6/330	0.00904504	0.0455762	0.00546466	0.0309488	-1.96007	9.22316	PDGFRA;AKT2;ERBB2;TLN1;EGFR;VCL
Downstream signaling of activated FGFR1_Homo sapiens_R-HSA-5654687	6/332	0.00930141	0.0455762	0.00562328	0.0309488	-1.92614	9.00967	PDGFRA;AKT2;ERBB2;TLN1;EGFR;VCL
Signaling by FGFR4_Homo sapiens_R-HSA-5654743	6/332	0.00930141	0.0455762	0.00562328	0.0309488	-1.92325	8.99616	PDGFRA;AKT2;ERBB2;TLN1;EGFR;VCL
Signaling by FGFR3_Homo sapiens_R-HSA-5654741	6/333	0.00943153	0.0455762	0.00570385	0.0309488	-1.92436	8.97465	PDGFRA;AKT2;ERBB2;TLN1;EGFR;VCL
GRB2 events in EGFR signaling_Homo sapiens_R-HSA-179812	5/235	0.00898923	0.0455762	0.0059687	0.0309488	-1.89373	8.92273	PDGFRA;ERBB2;TLN1;EGFR;VCL
RAF/MAP kinase cascade_Homo sapiens_R-HSA-5673001	5/235	0.00898923	0.0455762	0.0059687	0.0309488	-1.88251	8.86986	PDGFRA;ERBB2;TLN1;EGFR;VCL
SHC1 events in EGFR signaling_Homo sapiens_R-HSA-180336	5/235	0.00898923	0.0455762	0.0059687	0.0309488	-1.87623	8.8403	PDGFRA;ERBB2;TLN1;EGFR;VCL
FRS-mediated FGFR1 signaling_Homo sapiens_R-HSA-5654693	5/236	0.00914525	0.0455762	0.00607329	0.0309488	-1.87657	8.80959	PDGFRA;ERBB2;TLN1;EGFR;VCL
FRS-mediated FGFR2 signaling_Homo sapiens_R-HSA-5654700	5/236	0.00914525	0.0455762	0.00607329	0.0309488	-1.87093	8.78312	PDGFRA;ERBB2;TLN1;EGFR;VCL
SHC1 events in ERBB4 signaling_Homo sapiens_R-HSA-1250347	5/235	0.00898923	0.0455762	0.0059687	0.0309488	-1.86384	8.78191	PDGFRA;ERBB2;TLN1;EGFR;VCL
SOS-mediated signalling_Homo sapiens_R-HSA-112412	5/235	0.00898923	0.0455762	0.0059687	0.0309488	-1.85496	8.74008	PDGFRA;ERBB2;TLN1;EGFR;VCL
FRS-mediated FGFR3 signaling_Homo sapiens_R-HSA-5654706	5/236	0.00914525	0.0455762	0.00607329	0.0309488	-1.86142	8.7385	PDGFRA;ERBB2;TLN1;EGFR;VCL
Signaling by FGFR1_Homo sapiens_R-HSA-5654736	6/336	0.00982971	0.0455762	0.00595069	0.0309488	-1.88389	8.708	PDGFRA;AKT2;ERBB2;TLN1;EGFR;VCL
FRS-mediated FGFR4 signaling_Homo sapiens_R-HSA-5654712	5/236	0.00914525	0.0455762	0.00607329	0.0309488	-1.85041	8.6868	PDGFRA;ERBB2;TLN1;EGFR;VCL
ARMS-mediated activation_Homo sapiens_R-HSA-170984	5/239	0.00962453	0.0455762	0.00639484	0.0312864	-1.82228	8.46163	PDGFRA;ERBB2;TLN1;EGFR;VCL
Frs2-mediated activation_Homo sapiens_R-HSA-170968	5/240	0.00978807	0.0455762	0.00650465	0.0312864	-1.81221	8.38436	PDGFRA;ERBB2;TLN1;EGFR;VCL
MAPK1/MAPK3 signaling_Homo sapiens_R-HSA-5684996	5/241	0.00995351	0.0455762	0.00661579	0.0312864	-1.811	8.34842	PDGFRA;ERBB2;TLN1;EGFR;VCL
Signalling to p38 via RIT and RIN_Homo sapiens_R-HSA-187706	5/239	0.00962453	0.0455762	0.00639484	0.0312864	-1.79417	8.3311	PDGFRA;ERBB2;TLN1;EGFR;VCL
Prolonged ERK activation events_Homo sapiens_R-HSA-169893	5/242	0.0101209	0.0455762	0.00672826	0.0312864	-1.80105	8.27251	PDGFRA;ERBB2;TLN1;EGFR;VCL
Signaling by Leptin_Homo sapiens_R-HSA-2586552	5/243	0.0102902	0.0455762	0.00684208	0.0314229	-1.78291	8.1596	PDGFRA;ERBB2;TLN1;EGFR;VCL
PI5P, PP2A and IER3 Regulate PI3K/AKT Signaling_Homo sapiens_R-HSA-6811558	1983-03-01	0.0102914	0.0455762	0.00837025	0.033481	-1.32372	6.05795	PDGFRA;ERBB2;EGFR
TAK1 activates NFkB by phosphorylation and activation of IKKs complex_Homo sapiens_R-HSA-445989	2019-02-26	0.00862838	0.0455762	0.0081161	0.0331779	-1.18905	5.65119	APP;HMGB1
TRAF6 mediated NF-kB activation_Homo sapiens_R-HSA-933542	2019-02-24	0.00737906	0.0455762	0.00702134	0.0317041	-1.14414	5.61673	APP;HMGB1
ZBP1(DAI) mediated induction of type I IFNs_Homo sapiens_R-HSA-1606322	2019-02-26	0.00862838	0.0455762	0.0081161	0.0331779	-1.08987	5.1798	APP;HMGB1
Sema4D in semaphorin signaling_Homo sapiens_R-HSA-400685	2019-02-27	0.00928605	0.0455762	0.00869043	0.0336754	-0.830103	3.88425	ERBB2;MET
Downstream signal transduction_Homo sapiens_R-HSA-186763	6/341	0.0105198	0.0460005	0.00637942	0.0312864	-1.82807	8.32593	PDGFRA;AKT2;ERBB2;TLN1;EGFR;VCL
Interleukin receptor SHC signaling_Homo sapiens_R-HSA-912526	5/245	0.0106345	0.0460005	0.00707377	0.0317041	-1.7538	7.96863	PDGFRA;ERBB2;TLN1;EGFR;VCL
Signalling to RAS_Homo sapiens_R-HSA-167044	5/246	0.0108097	0.0462206	0.00719166	0.0318488	-1.76086	7.97196	PDGFRA;ERBB2;TLN1;EGFR;VCL
DAP12 signaling_Homo sapiens_R-HSA-2424491	6/344	0.01095	0.0462888	0.0066473	0.0312864	-1.82585	8.24262	PDGFRA;AKT2;ERBB2;TLN1;EGFR;VCL
VEGFR2 mediated cell proliferation_Homo sapiens_R-HSA-5218921	5/248	0.0111658	0.0466706	0.00743158	0.0325241	-1.76028	7.9123	PDGFRA;ERBB2;TLN1;EGFR;VCL
Role of LAT2/NTAL/LAB on calcium mobilization_Homo sapiens_R-HSA-2730905	4/162	0.0115895	0.0479031	0.0084818	0.0335663	-1.53648	6.8491	PDGFRA;AKT2;ERBB2;EGFR
Interleukin-2 signaling_Homo sapiens_R-HSA-451927	5/252	0.011902	0.0483645	0.00792821	0.0331779	-1.7009	7.53677	PDGFRA;ERBB2;TLN1;EGFR;VCL
Signalling to ERKs_Homo sapiens_R-HSA-187687	5/253	0.0120911	0.0483645	0.00805591	0.0331779	-1.69252	7.47296	PDGFRA;ERBB2;TLN1;EGFR;VCL
Diseases of glycosylation_Homo sapiens_R-HSA-3781865	1988-03-01	0.0120558	0.0483645	0.0097699	0.0362768	-1.10225	4.86997	MUC1;MUC2;MUC13
Signaling by EGFR_Homo sapiens_R-HSA-177929	6/355	0.0126346	0.0500009	0.00770036	0.0331779	-1.75861	7.68743	PDGFRA;AKT2;ERBB2;TLN1;EGFR;VCL
Activation of Matrix Metalloproteinases_Homo sapiens_R-HSA-1592389	1932-02-01	0.0128945	0.0504921	0.0118245	0.0431248	-0.48276	2.10047	MMP13;TIMP1
DAP12 interactions_Homo sapiens_R-HSA-2172127	6/359	0.0132901	0.0514993	0.00811184	0.0331779	-1.69925	7.34201	PDGFRA;AKT2;ERBB2;TLN1;EGFR;VCL
Signaling by FGFR2_Homo sapiens_R-HSA-5654738	6/361	0.0136267	0.0519204	0.00832346	0.033481	-1.75116	7.52252	PDGFRA;AKT2;ERBB2;TLN1;EGFR;VCL
Interleukin-3, 5 and GM-CSF signaling_Homo sapiens_R-HSA-512988	5/261	0.013678	0.0519204	0.00912978	0.0346559	-1.65254	7.09267	PDGFRA;ERBB2;TLN1;EGFR;VCL
Signaling by PDGF_Homo sapiens_R-HSA-186797	6/364	0.0141426	0.053142	0.00864837	0.0336754	-1.69951	7.23746	PDGFRA;AKT2;ERBB2;TLN1;EGFR;VCL
Signaling by FGFR_Homo sapiens_R-HSA-190236	6/366	0.0144941	0.0539181	0.00887002	0.034017	-1.71328	7.25405	PDGFRA;AKT2;ERBB2;TLN1;EGFR;VCL
NCAM signaling for neurite out-growth_Homo sapiens_R-HSA-375165	5/266	0.014738	0.0542826	0.00984935	0.0362768	-1.62292	6.8444	PDGFRA;ERBB2;TLN1;EGFR;VCL
NGF signalling via TRKA from the plasma membrane_Homo sapiens_R-HSA-187037	6/374	0.0159611	0.0582111	0.00979785	0.0362768	-1.65734	6.8574	PDGFRA;AKT2;ERBB2;TLN1;EGFR;VCL
MAP2K and MAPK activation_Homo sapiens_R-HSA-5674135	1938-02-01	0.0178969	0.0646372	0.0161398	0.0555926	-0.830559	3.34145	TLN1;VCL
Degradation of the extracellular matrix_Homo sapiens_R-HSA-1474228	3/106	0.0197725	0.0707246	0.0158902	0.0552445	-1.12565	4.41643	MMP13;TIMP1;CD44
Fc epsilon receptor (FCERI) signaling_Homo sapiens_R-HSA-2454202	6/395	0.0202957	0.0707936	0.0125634	0.0453747	-1.61035	6.27608	PDGFRA;AKT2;ERBB2;TLN1;EGFR;VCL
FCERI mediated MAPK activation_Homo sapiens_R-HSA-2871796	5/289	0.0203249	0.0707936	0.0136687	0.048892	-1.59372	6.209	PDGFRA;ERBB2;TLN1;EGFR;VCL
Downstream signaling events of B Cell Receptor (BCR)_Homo sapiens_R-HSA-1168372	4/192	0.0203627	0.0707936	0.0149197	0.0528584	-1.52537	5.93986	PDGFRA;AKT2;ERBB2;EGFR
O-linked glycosylation_Homo sapiens_R-HSA-5173105	3/110	0.0217817	0.0743375	0.0174855	0.0591327	-1.11027	4.24866	MUC1;MUC2;MUC13
Non-integrin membrane-ECM interactions_Homo sapiens_R-HSA-3000171	1942-02-01	0.0216158	0.0743375	0.0193356	0.0642218	-0.686119	2.63081	TGFB1;ITGB5
TCF dependent signaling in response to WNT_Homo sapiens_R-HSA-201681	4/199	0.0228674	0.0773334	0.0167697	0.0572325	-1.33352	5.03811	AKT2;MYC;DVL1;LGR5
NRAGE signals death through JNK_Homo sapiens_R-HSA-193648	1945-02-01	0.0245963	0.0824307	0.0218924	0.0720707	-0.545556	2.02137	TIAM1;ECT2
GRB7 events in ERBB2 signaling_Homo sapiens_R-HSA-1306955	2019-01-05	0.0267126	0.0871675	0.0289311	0.0904401	4.32057	-15.6518	ERBB2
Sperm:Oocyte Membrane Binding_Homo sapiens_R-HSA-1300652	2019-01-05	0.0267126	0.0871675	0.0289311	0.0904401	8.12711	-29.4414	CD9
Negative regulation of TCF-dependent signaling by DVL-interacting proteins_Homo sapiens_R-HSA-5368598	2019-01-05	0.0267126	0.0871675	0.0289311	0.0904401	9.04064	-32.7508	DVL1
EPH-ephrin mediated repulsion of cells_Homo sapiens_R-HSA-3928665	1948-02-01	0.0277342	0.0897139	0.0245816	0.0802137	-0.6921	2.48124	TIAM1;EPHA2
Gastrin-CREB signalling pathway via PKC and MAPK_Homo sapiens_R-HSA-881907	6/432	0.0297657	0.0954554	0.0187149	0.0627202	-1.52334	5.35361	PDGFRA;APP;ERBB2;TLN1;EGFR;VCL
Innate Immune System_Homo sapiens_R-HSA-168249	9/807	0.0305913	0.0972646	0.0153492	0.0538671	-1.38055	4.81402	PDGFRA;APP;AKT2;ERBB2;HMGB1;TLN1;CLU;EGFR;VCL
Synthesis of 5-eicosatetraenoic acids_Homo sapiens_R-HSA-2142688	2019-01-06	0.0319697	0.0974813	0.0336728	0.0956203	6.96709	-23.9874	GPX2
SMAD2/3 Phosphorylation Motif Mutants in Cancer_Homo sapiens_R-HSA-3304356	2019-01-06	0.0319697	0.0974813	0.0336728	0.0956203	7.10524	-24.4631	TGFB1
Uptake and function of diphtheria toxin_Homo sapiens_R-HSA-5336415	2019-01-06	0.0319697	0.0974813	0.0336728	0.0956203	7.60523	-26.1846	CD9
Synthesis of 15-eicosatetraenoic acid derivatives_Homo sapiens_R-HSA-2142770	2019-01-06	0.0319697	0.0974813	0.0336728	0.0956203	8.07974	-27.8183	GPX2
Synthesis of 12-eicosatetraenoic acid derivatives_Homo sapiens_R-HSA-2142712	2019-01-06	0.0319697	0.0974813	0.0336728	0.0956203	9.08092	-31.2653	GPX2
Signaling by the B Cell Receptor (BCR)_Homo sapiens_R-HSA-983705	4/233	0.0376353	0.101066	0.02778	0.0890875	-1.2611	4.13617	PDGFRA;AKT2;ERBB2;EGFR
Cell-Cell communication_Homo sapiens_R-HSA-1500931	3/131	0.0340941	0.101066	0.0272901	0.0882775	-1.04082	3.51653	CD47;RSU1;LIMS1
Assembly of collagen fibrils and other multimeric structures_Homo sapiens_R-HSA-2022090	1954-02-01	0.0344594	0.101066	0.0303402	0.0940546	-0.597772	2.01328	MMP13;LOXL3
Constitutive Signaling by NOTCH1 HD+PEST Domain Mutants_Homo sapiens_R-HSA-2894862	1957-02-01	0.0380356	0.101066	0.0334015	0.0956203	-0.562551	1.83911	DLL4;MYC
Constitutive Signaling by NOTCH1 PEST Domain Mutants_Homo sapiens_R-HSA-2644606	1957-02-01	0.0380356	0.101066	0.0334015	0.0956203	-0.549559	1.79664	DLL4;MYC
Signaling by NOTCH1 HD+PEST Domain Mutants in Cancer_Homo sapiens_R-HSA-2894858	1957-02-01	0.0380356	0.101066	0.0334015	0.0956203	-0.538562	1.76068	DLL4;MYC
ECM proteoglycans_Homo sapiens_R-HSA-3000178	1955-02-01	0.0356361	0.101066	0.0313475	0.0956203	-0.520339	1.73502	TGFB1;ITGB5
Signaling by NOTCH1 in Cancer_Homo sapiens_R-HSA-2644603	1957-02-01	0.0380356	0.101066	0.0334015	0.0956203	-0.526818	1.72229	DLL4;MYC
Signaling by NOTCH1 PEST Domain Mutants in Cancer_Homo sapiens_R-HSA-2644602	1957-02-01	0.0380356	0.101066	0.0334015	0.0956203	-0.520995	1.70325	DLL4;MYC
PTK6 promotes HIF1A stabilization_Homo sapiens_R-HSA-8857538	2019-01-07	0.0371986	0.101066	0.0383918	0.101289	4.66242	-15.3463	EGFR
Constitutive Signaling by NOTCH1 t(7;9)(NOTCH1:M1580_K2555) Translocation Mutant_Homo sapiens_R-HSA-2660826	2019-01-07	0.0371986	0.101066	0.0383918	0.101289	6.23446	-20.5206	DLL4
Signaling by NOTCH1 t(7;9)(NOTCH1:M1580_K2555) Translocation Mutant_Homo sapiens_R-HSA-2660825	2019-01-07	0.0371986	0.101066	0.0383918	0.101289	6.41071	-21.1008	DLL4
Loss of Function of SMAD2/3 in Cancer_Homo sapiens_R-HSA-3304349	2019-01-07	0.0371986	0.101066	0.0383918	0.101289	6.56874	-21.6209	TGFB1
Binding of TCF/LEF:CTNNB1 to target gene promoters_Homo sapiens_R-HSA-4411364	2019-01-07	0.0371986	0.101066	0.0383918	0.101289	6.69018	-22.0206	MYC
SMAD2/3 MH2 Domain Mutants in Cancer_Homo sapiens_R-HSA-3315487	2019-01-07	0.0371986	0.101066	0.0383918	0.101289	6.71841	-22.1135	TGFB1
Loss of Function of TGFBR1 in Cancer_Homo sapiens_R-HSA-3656534	2019-01-07	0.0371986	0.101066	0.0383918	0.101289	7.13253	-23.4766	TGFB1
TGFBR1 KD Mutants in Cancer_Homo sapiens_R-HSA-3656532	2019-01-07	0.0371986	0.101066	0.0383918	0.101289	7.42178	-24.4287	TGFB1
Multifunctional anion exchangers_Homo sapiens_R-HSA-427601	2019-01-07	0.0371986	0.101066	0.0383918	0.101289	7.58939	-24.9803	SLC26A3
Cross-presentation of particulate exogenous antigens (phagosomes)_Homo sapiens_R-HSA-1236973	2019-01-08	0.0423996	0.108032	0.0430883	0.1073	3.8753	-12.2483	ITGB5
Formyl peptide receptors bind formyl peptides and many other ligands_Homo sapiens_R-HSA-444473	2019-01-08	0.0423996	0.108032	0.0430883	0.1073	5.23573	-16.5481	APP
Terminal pathway of complement_Homo sapiens_R-HSA-166665	2019-01-08	0.0423996	0.108032	0.0430883	0.1073	5.99628	-18.952	CLU
Signaling by TGF-beta Receptor Complex in Cancer_Homo sapiens_R-HSA-3304351	2019-01-08	0.0423996	0.108032	0.0430883	0.1073	6.63541	-20.972	TGFB1
Sema4D mediated inhibition of cell attachment and migration_Homo sapiens_R-HSA-416550	2019-01-08	0.0423996	0.108032	0.0430883	0.1073	7.44277	-23.5237	MET
WNT mediated activation of DVL_Homo sapiens_R-HSA-201688	2019-01-08	0.0423996	0.108032	0.0430883	0.1073	7.57061	-23.9278	DVL1
Cell death signalling via NRAGE, NRIF and NADE_Homo sapiens_R-HSA-204998	1961-02-01	0.0430134	0.10885	0.0376629	0.101289	-0.410417	1.29127	TIAM1;ECT2
AKT phosphorylates targets in the nucleus_Homo sapiens_R-HSA-198693	2019-01-09	0.0475727	0.116428	0.0477624	0.113169	3.84949	-11.7236	AKT2
EGFR Transactivation by Gastrin_Homo sapiens_R-HSA-2179392	2019-01-09	0.0475727	0.116428	0.0477624	0.113169	4.10833	-12.5119	EGFR
Role of Abl in Robo-Slit signaling_Homo sapiens_R-HSA-428890	2019-01-09	0.0475727	0.116428	0.0477624	0.113169	5.45156	-16.6027	CAP2
Pyrimidine salvage reactions_Homo sapiens_R-HSA-73614	2019-01-09	0.0475727	0.116428	0.0477624	0.113169	6.05913	-18.4531	TK1
Crosslinking of collagen fibrils_Homo sapiens_R-HSA-2243919	2019-01-09	0.0475727	0.116428	0.0477624	0.113169	6.47103	-19.7075	LOXL3
APC/C:Cdc20 mediated degradation of Securin_Homo sapiens_R-HSA-174154	1966-02-01	0.0495552	0.119705	0.043266	0.1073	-0.714582	2.14708	PTTG1;UBE2C
Cytosolic sensors of pathogen-associated DNA_Homo sapiens_R-HSA-1834949	1966-02-01	0.0495552	0.119705	0.043266	0.1073	-0.481996	1.44824	APP;HMGB1
Signaling by PTK6_Homo sapiens_R-HSA-8848021	1967-02-01	0.0509043	0.12217	0.044422	0.109437	-0.528806	1.57468	ERBB2;EGFR
Separation of Sister Chromatids_Homo sapiens_R-HSA-2467813	3/162	0.057553	0.133651	0.0461374	0.112915	-0.969525	2.76804	PTTG1;UBE2C;BIRC5
APC/C:Cdh1 mediated degradation of Cdc20 and other APC/C:Cdh1 targeted proteins in late mitosis/early G1_Homo sapiens_R-HSA-174178	1971-02-01	0.0564305	0.133651	0.0491598	0.115743	-0.75287	2.16431	PTTG1;UBE2C
TRAF6 Mediated Induction of proinflammatory cytokines_Homo sapiens_R-HSA-168180	1972-02-01	0.0578436	0.133651	0.050372	0.117115	-0.570577	1.62615	APP;HMGB1
Signaling by NOTCH1_Homo sapiens_R-HSA-1980143	1972-02-01	0.0578436	0.133651	0.050372	0.117115	-0.483556	1.37814	DLL4;MYC
Signaling by NOTCH3_Homo sapiens_R-HSA-1980148	2019-01-11	0.057836	0.133651	0.0570437	0.125564	4.36069	-12.4286	DLL4
Signaling by NOTCH4_Homo sapiens_R-HSA-1980150	2019-01-11	0.057836	0.133651	0.0570437	0.125564	4.99783	-14.2445	DLL4
Signaling by TGF-beta Receptor Complex_Homo sapiens_R-HSA-170834	1973-02-01	0.059269	0.136099	0.051595	0.119213	-0.415584	1.1743	TGFB1;MYC
Signaling by Interleukins_Homo sapiens_R-HSA-449147	5/392	0.0614148	0.138513	0.0428377	0.1073	-1.03342	2.88335	PDGFRA;ERBB2;TLN1;EGFR;VCL
APC/C:Cdc20 mediated degradation of mitotic proteins_Homo sapiens_R-HSA-176409	1974-02-01	0.0607065	0.138513	0.0528287	0.12131	-0.68273	1.91281	PTTG1;UBE2C
Activation of APC/C and APC/C:Cdc20 mediated degradation of mitotic proteins_Homo sapiens_R-HSA-176814	1975-02-01	0.062156	0.138513	0.054073	0.12191	-0.649142	1.80339	PTTG1;UBE2C
G alpha (12/13) signalling events_Homo sapiens_R-HSA-416482	1975-02-01	0.062156	0.138513	0.054073	0.12191	-0.37214	1.03384	TIAM1;ECT2
The NLRP3 inflammasome_Homo sapiens_R-HSA-844456	2019-01-12	0.0629265	0.138513	0.0616511	0.132011	3.94527	-10.9118	APP
Hyaluronan uptake and degradation_Homo sapiens_R-HSA-2160916	2019-01-12	0.0629265	0.138513	0.0616511	0.132011	4.07325	-11.2658	CD44
Passive transport by Aquaporins_Homo sapiens_R-HSA-432047	2019-01-12	0.0629265	0.138513	0.0616511	0.132011	4.30804	-11.9151	AQP5
Mitotic Anaphase_Homo sapiens_R-HSA-68882	3/173	0.0673119	0.144223	0.0540449	0.12191	-0.876103	2.36409	PTTG1;UBE2C;BIRC5
Mitotic Metaphase and Anaphase_Homo sapiens_R-HSA-2555396	3/174	0.0682345	0.144223	0.0547944	0.122792	-0.828144	2.2234	PTTG1;UBE2C;BIRC5
RIG-I/MDA5 mediated induction of IFN-alpha/beta pathways_Homo sapiens_R-HSA-168928	1979-02-01	0.0680698	0.144223	0.0591534	0.129442	-0.354676	0.953094	APP;HMGB1
AKT phosphorylates targets in the cytosol_Homo sapiens_R-HSA-198323	2019-01-13	0.0679897	0.144223	0.0662366	0.132011	2.93456	-7.88928	AKT2
Signal regulatory protein (SIRP) family interactions_Homo sapiens_R-HSA-391160	2019-01-13	0.0679897	0.144223	0.0662366	0.132011	3.63759	-9.77929	CD47
Activation of DNA fragmentation factor_Homo sapiens_R-HSA-211227	2019-01-13	0.0679897	0.144223	0.0662366	0.132011	4.25786	-11.4468	HMGB1
Apoptosis induced DNA fragmentation_Homo sapiens_R-HSA-140342	2019-01-13	0.0679897	0.144223	0.0662366	0.132011	4.324	-11.6246	HMGB1
Signaling by Wnt_Homo sapiens_R-HSA-195721	4/295	0.0758913	0.145874	0.0570132	0.125564	-0.784248	2.02215	AKT2;MYC;DVL1;LGR5
APC/C-mediated degradation of cell cycle proteins_Homo sapiens_R-HSA-174143	1985-02-01	0.0772709	0.145874	0.0670702	0.132011	-0.550441	1.40937	PTTG1;UBE2C
Regulation of mitotic cell cycle_Homo sapiens_R-HSA-453276	1985-02-01	0.0772709	0.145874	0.0670702	0.132011	-0.522427	1.33764	PTTG1;UBE2C
MyD88 cascade initiated on plasma membrane_Homo sapiens_R-HSA-975871	1982-02-01	0.0726225	0.145874	0.0630687	0.132011	-0.428696	1.12425	APP;HMGB1
Toll Like Receptor 10 (TLR10) Cascade_Homo sapiens_R-HSA-168142	1982-02-01	0.0726225	0.145874	0.0630687	0.132011	-0.4212	1.10459	APP;HMGB1
Toll Like Receptor 5 (TLR5) Cascade_Homo sapiens_R-HSA-168176	1982-02-01	0.0726225	0.145874	0.0630687	0.132011	-0.412276	1.08118	APP;HMGB1
TRAF6 mediated induction of NFkB and MAP kinases upon TLR7/8 or 9 activation_Homo sapiens_R-HSA-975138	1983-02-01	0.0741616	0.145874	0.0643931	0.132011	-0.387138	1.00714	APP;HMGB1
MyD88 dependent cascade initiated on endosome_Homo sapiens_R-HSA-975155	1985-02-01	0.0772709	0.145874	0.0670702	0.132011	-0.3825	0.979368	APP;HMGB1
Toll Like Receptor 7/8 (TLR7/8) Cascade_Homo sapiens_R-HSA-168181	1985-02-01	0.0772709	0.145874	0.0670702	0.132011	-0.364326	0.932835	APP;HMGB1
TP53 Regulates Metabolic Genes_Homo sapiens_R-HSA-5628897	1984-02-01	0.0757111	0.145874	0.065727	0.132011	-0.309207	0.79801	GPX2;AKT2
Collagen formation_Homo sapiens_R-HSA-1474290	1985-02-01	0.0772709	0.145874	0.0670702	0.132011	-0.299253	0.76622	MMP13;LOXL3
p75 NTR receptor-mediated signalling_Homo sapiens_R-HSA-193704	1983-02-01	0.0741616	0.145874	0.0643931	0.132011	-0.238628	0.620793	TIAM1;ECT2
Constitutive Signaling by NOTCH1 HD Domain Mutants_Homo sapiens_R-HSA-2691232	2019-01-15	0.078035	0.145874	0.0753419	0.137882	2.6042	-6.64226	DLL4
Signaling by NOTCH1 HD Domain Mutants in Cancer_Homo sapiens_R-HSA-2691230	2019-01-15	0.078035	0.145874	0.0753419	0.137882	2.70377	-6.89623	DLL4
Receptor-ligand binding initiates the second proteolytic cleavage of Notch receptor_Homo sapiens_R-HSA-156988	2019-01-14	0.0730258	0.145874	0.0708001	0.135741	2.79237	-7.30746	DLL4
Constitutive Signaling by EGFRvIII_Homo sapiens_R-HSA-5637810	2019-01-15	0.078035	0.145874	0.0753419	0.137882	3.11052	-7.93368	EGFR
Signaling by EGFRvIII in Cancer_Homo sapiens_R-HSA-5637812	2019-01-15	0.078035	0.145874	0.0753419	0.137882	3.1757	-8.09992	EGFR
Activation of BAD and translocation to mitochondria_Homo sapiens_R-HSA-111447	2019-01-15	0.078035	0.145874	0.0753419	0.137882	3.24679	-8.28126	AKT2
TP53 regulates transcription of several additional cell death genes whose specific roles in p53-dependent apoptosis remain uncertain_Homo sapiens_R-HSA-6803205	2019-01-14	0.0730258	0.145874	0.0708001	0.135741	3.27902	-8.58101	BIRC5
Regulation of TP53 Activity through Association with Co-factors_Homo sapiens_R-HSA-6804759	2019-01-14	0.0730258	0.145874	0.0708001	0.135741	3.57463	-9.3546	AKT2
SEMA3A-Plexin repulsion signaling by inhibiting Integrin adhesion_Homo sapiens_R-HSA-399955	2019-01-14	0.0730258	0.145874	0.0708001	0.135741	3.57492	-9.35537	TLN1
p130Cas linkage to MAPK signaling for integrins_Homo sapiens_R-HSA-372708	2019-01-15	0.078035	0.145874	0.0753419	0.137882	4.16057	-10.612	TLN1
GRB2:SOS provides linkage to MAPK signaling for Integrins_Homo sapiens_R-HSA-354194	2019-01-15	0.078035	0.145874	0.0753419	0.137882	4.31341	-11.0018	TLN1
Cell junction organization_Homo sapiens_R-HSA-446728	1986-02-01	0.0788409	0.146644	0.0684226	0.133964	-0.154642	0.392841	RSU1;LIMS1
Toll Like Receptor 9 (TLR9) Cascade_Homo sapiens_R-HSA-168138	1988-02-01	0.0820108	0.151781	0.0711548	0.135741	-0.32567	0.814469	APP;HMGB1
TGF-beta receptor signaling in EMT (epithelial to mesenchymal transition)_Homo sapiens_R-HSA-2173791	2019-01-16	0.0830173	0.152883	0.0798619	0.14283	2.68504	-6.68227	TGFB1
MyD88:Mal cascade initiated on plasma membrane_Homo sapiens_R-HSA-166058	1992-02-01	0.088466	0.158218	0.0767246	0.137882	-0.235942	0.572192	APP;HMGB1
Toll Like Receptor 2 (TLR2) Cascade_Homo sapiens_R-HSA-181438	1992-02-01	0.088466	0.158218	0.0767246	0.137882	-0.225503	0.546875	APP;HMGB1
Toll Like Receptor TLR1:TLR2 Cascade_Homo sapiens_R-HSA-168179	1992-02-01	0.088466	0.158218	0.0767246	0.137882	-0.218012	0.528708	APP;HMGB1
Toll Like Receptor TLR6:TLR2 Cascade_Homo sapiens_R-HSA-168188	1992-02-01	0.088466	0.158218	0.0767246	0.137882	-0.208536	0.505728	APP;HMGB1
Inflammasomes_Homo sapiens_R-HSA-622312	2019-01-17	0.087973	0.158218	0.0843604	0.145287	3.3706	-8.19301	APP
Hyaluronan metabolism_Homo sapiens_R-HSA-2142845	2019-01-17	0.087973	0.158218	0.0843604	0.145287	3.69148	-8.97297	CD44
Muscle contraction_Homo sapiens_R-HSA-397014	3/196	0.0899458	0.160095	0.0725333	0.137665	-0.427219	1.02898	ITGB5;TLN1;VCL
EPH-Ephrin signaling_Homo sapiens_R-HSA-2682334	1995-02-01	0.0934038	0.165458	0.0809909	0.144156	-0.194818	0.461879	TIAM1;EPHA2
MyD88-independent TLR3/TLR4 cascade_Homo sapiens_R-HSA-166166	1997-02-01	0.0967393	0.166134	0.0838757	0.145287	-0.323935	0.756625	APP;HMGB1
Toll Like Receptor 3 (TLR3) Cascade_Homo sapiens_R-HSA-168164	1997-02-01	0.0967393	0.166134	0.0838757	0.145287	-0.31479	0.735266	APP;HMGB1
TRIF-mediated TLR3/TLR4 signaling_Homo sapiens_R-HSA-937061	1997-02-01	0.0967393	0.166134	0.0838757	0.145287	-0.306418	0.715712	APP;HMGB1
SUMO E3 ligases SUMOylate target proteins_Homo sapiens_R-HSA-3108232	1996-02-01	0.0950673	0.166134	0.0824293	0.145287	-0.191893	0.451557	BIRC5;BMI1
Constitutive Signaling by Ligand-Responsive EGFR Cancer Variants_Homo sapiens_R-HSA-1236382	2019-01-19	0.0978049	0.166134	0.0932929	0.155628	2.04195	-4.74709	EGFR
Signaling by EGFR in Cancer_Homo sapiens_R-HSA-1643713	2019-01-19	0.0978049	0.166134	0.0932929	0.155628	2.09508	-4.87061	EGFR
Signaling by Ligand-Responsive EGFR Variants in Cancer_Homo sapiens_R-HSA-5637815	2019-01-19	0.0978049	0.166134	0.0932929	0.155628	2.114	-4.91458	EGFR
Phosphorylation of the APC/C_Homo sapiens_R-HSA-176412	2019-01-19	0.0978049	0.166134	0.0932929	0.155628	2.54682	-5.92079	UBE2C
Conversion from APC/C:Cdc20 to APC/C:Cdh1 in late anaphase_Homo sapiens_R-HSA-176407	2019-01-19	0.0978049	0.166134	0.0932929	0.155628	2.95875	-6.87844	UBE2C
Cell surface interactions at the vascular wall_Homo sapiens_R-HSA-202733	2/101	0.10351	0.17038	0.0897391	0.153133	-0.0931267	0.211219	CD47;CD44
SUMOylation_Homo sapiens_R-HSA-2990846	2/101	0.10351	0.17038	0.0897391	0.153133	-0.0915467	0.207636	BIRC5;BMI1
Inactivation of APC/C via direct inhibition of the APC/C complex_Homo sapiens_R-HSA-141430	2019-01-20	0.102681	0.17038	0.0977272	0.15945	2.64198	-6.01347	UBE2C
Inhibition of the proteolytic activity of APC/C required for the onset of anaphase by mitotic spindle checkpoint components_Homo sapiens_R-HSA-141405	2019-01-20	0.102681	0.17038	0.0977272	0.15945	2.68107	-6.10244	UBE2C
Regulation of gene expression in beta cells_Homo sapiens_R-HSA-210745	2019-01-20	0.102681	0.17038	0.0977272	0.15945	2.95649	-6.72934	AKT2
Hormone-sensitive lipase (HSL)-mediated triacylglycerol hydrolysis_Homo sapiens_R-HSA-163560	2019-01-20	0.102681	0.17038	0.0977272	0.15945	3.35244	-7.63058	FABP1
Glucuronidation_Homo sapiens_R-HSA-156588	2019-01-20	0.102681	0.17038	0.0977272	0.15945	3.46878	-7.89539	UGT1A9
NOTCH2 Activation and Transmission of Signal to the Nucleus_Homo sapiens_R-HSA-2979096	2019-01-21	0.107532	0.173921	0.10214	0.163777	2.33371	-5.20411	DLL4
Regulation of FZD by ubiquitination_Homo sapiens_R-HSA-4641263	2019-01-21	0.107532	0.173921	0.10214	0.163777	2.39452	-5.3397	LGR5
Mitotic Spindle Checkpoint_Homo sapiens_R-HSA-69618	2019-01-21	0.107532	0.173921	0.10214	0.163777	2.62368	-5.85073	UBE2C
Signal transduction by L1_Homo sapiens_R-HSA-445144	2019-01-21	0.107532	0.173921	0.10214	0.163777	2.70724	-6.03705	EGFR
CTLA4 inhibitory signaling_Homo sapiens_R-HSA-389513	2019-01-22	0.112356	0.180157	0.106532	0.167924	2.24201	-4.90123	AKT2
CD28 dependent PI3K/Akt signaling_Homo sapiens_R-HSA-389357	2019-01-22	0.112356	0.180157	0.106532	0.167924	2.37794	-5.19838	AKT2
APC/C:Cdc20 mediated degradation of Cyclin B_Homo sapiens_R-HSA-174048	2019-01-23	0.117155	0.186246	0.110903	0.171846	2.08808	-4.47739	UBE2C
Regulation of TP53 Activity through Acetylation_Homo sapiens_R-HSA-6804758	2019-01-23	0.117155	0.186246	0.110903	0.171846	2.66966	-5.72445	AKT2
Cytokine Signaling in Immune system_Homo sapiens_R-HSA-1280215	6/620	0.11918	0.188659	0.0816568	0.144649	-0.323243	0.687577	PDGFRA;ERBB2;TLN1;CD44;EGFR;VCL
Pyrimidine metabolism_Homo sapiens_R-HSA-73848	2019-01-24	0.121928	0.19138	0.115253	0.175714	2.64075	-5.55701	TK1
Sema4D induced cell migration and growth-cone collapse_Homo sapiens_R-HSA-416572	2019-01-24	0.121928	0.19138	0.115253	0.175714	2.71959	-5.72292	ERBB2
Activated TLR4 signalling_Homo sapiens_R-HSA-166054	2/112	0.122756	0.19187	0.106459	0.167924	-0.0875982	0.183742	APP;HMGB1
PPARA activates gene expression_Homo sapiens_R-HSA-1989781	2/113	0.124547	0.193855	0.108019	0.169548	-0.128401	0.267469	FABP1;UGT1A9
RHO GTPases Activate Formins_Homo sapiens_R-HSA-5663220	2/114	0.126344	0.193922	0.109585	0.171284	-0.0492643	0.101915	DVL1;BIRC5
APC-Cdc20 mediated degradation of Nek2A_Homo sapiens_R-HSA-179409	2019-01-25	0.126675	0.193922	0.119583	0.1801	2.04237	-4.2198	UBE2C
Constitutive Signaling by AKT1 E17K in Cancer_Homo sapiens_R-HSA-5674400	2019-01-25	0.126675	0.193922	0.119583	0.1801	2.21582	-4.57818	AKT2
Amino acid synthesis and interconversion (transamination)_Homo sapiens_R-HSA-70614	2019-01-25	0.126675	0.193922	0.119583	0.1801	3.10294	-6.41108	PSAT1
Immune System_Homo sapiens_R-HSA-168256	12/1547	0.129752	0.197095	0.065617	0.132011	-0.173353	0.354008	PDGFRA;APP;ITGB5;UBE2C;AKT2;ERBB2;HMGB1;TLN1;CLU;CD44;EGFR;VCL
Regulation of lipid metabolism by Peroxisome proliferator-activated receptor alpha (PPARalpha)_Homo sapiens_R-HSA-400206	2/116	0.129957	0.197095	0.112736	0.173297	-0.0968604	0.197649	FABP1;UGT1A9
Downregulation of TGF-beta receptor signaling_Homo sapiens_R-HSA-2173788	2019-01-26	0.131397	0.197095	0.123891	0.182164	2.10337	-4.26887	TGFB1
Fertilization_Homo sapiens_R-HSA-1187000	2019-01-26	0.131397	0.197095	0.123891	0.182164	2.5941	-5.26481	CD9
Reproduction_Homo sapiens_R-HSA-1474165	2019-01-26	0.131397	0.197095	0.123891	0.182164	2.60475	-5.28643	CD9
EGFR downregulation_Homo sapiens_R-HSA-182971	2019-01-27	0.136093	0.2009	0.128179	0.185535	1.94551	-3.88016	EGFR
VEGFR2 mediated vascular permeability_Homo sapiens_R-HSA-5218920	2019-01-27	0.136093	0.2009	0.128179	0.185535	2.32818	-4.64336	AKT2
Integrin alphaIIb beta3 signaling_Homo sapiens_R-HSA-354192	2019-01-27	0.136093	0.2009	0.128179	0.185535	2.42564	-4.83774	TLN1
Uptake and actions of bacterial toxins_Homo sapiens_R-HSA-5339562	2019-01-27	0.136093	0.2009	0.128179	0.185535	2.62575	-5.23683	CD9
Signaling by Rho GTPases_Homo sapiens_R-HSA-194315	4/367	0.137406	0.202036	0.105795	0.167924	-0.179098	0.355477	TIAM1;DVL1;BIRC5;ECT2
Toll Like Receptor 4 (TLR4) Cascade_Homo sapiens_R-HSA-166016	2/122	0.140937	0.204799	0.12233	0.182027	0.00923258	-0.0180907	APP;HMGB1
Signaling by NOTCH_Homo sapiens_R-HSA-157118	2/122	0.140937	0.204799	0.12233	0.182027	0.0223897	-0.0438713	DLL4;MYC
Rho GTPase cycle_Homo sapiens_R-HSA-194840	2/122	0.140937	0.204799	0.12233	0.182027	0.172624	-0.338246	TIAM1;ECT2
Activation of BH3-only proteins_Homo sapiens_R-HSA-114452	2019-01-29	0.145411	0.210478	0.136694	0.197093	2.1698	-4.18379	AKT2
Activated NOTCH1 Transmits Signal to the Nucleus_Homo sapiens_R-HSA-2122948	2019-01-30	0.150033	0.216326	0.14092	0.202403	1.90321	-3.6102	DLL4
Post-translational protein modification_Homo sapiens_R-HSA-597592	5/521	0.151425	0.217491	0.11133	0.171846	-0.1424	0.268804	MUC1;MUC2;BIRC5;MUC13;BMI1
Disassembly of the destruction complex and recruitment of AXIN to the membrane_Homo sapiens_R-HSA-4641262	2019-01-31	0.154629	0.221239	0.145127	0.206977	2.21183	-4.12887	DVL1
Signaling by NOTCH2_Homo sapiens_R-HSA-1980145	1932-01-01	0.159201	0.223483	0.149313	0.208814	1.75862	-3.23162	DLL4
SMAD2/SMAD3:SMAD4 heterotrimer regulates transcription_Homo sapiens_R-HSA-2173796	1932-01-01	0.159201	0.223483	0.149313	0.208814	1.79732	-3.30274	MYC
TGF-beta receptor signaling activates SMADs_Homo sapiens_R-HSA-2173789	1932-01-01	0.159201	0.223483	0.149313	0.208814	1.82035	-3.34505	TGFB1
Regulation of beta-cell development_Homo sapiens_R-HSA-186712	1932-01-01	0.159201	0.223483	0.149313	0.208814	2.1183	-3.89256	AKT2
Signaling by Robo receptor_Homo sapiens_R-HSA-376176	1932-01-01	0.159201	0.223483	0.149313	0.208814	2.17047	-3.98842	CAP2
CD28 co-stimulation_Homo sapiens_R-HSA-389356	1933-01-01	0.163749	0.228145	0.153479	0.212247	1.87162	-3.38655	AKT2
Detoxification of Reactive Oxygen Species_Homo sapiens_R-HSA-3299685	1933-01-01	0.163749	0.228145	0.153479	0.212247	2.26988	-4.10716	GPX2
EPHA-mediated growth cone collapse_Homo sapiens_R-HSA-3928663	1934-01-01	0.168272	0.232703	0.157626	0.216372	1.9424	-3.46169	EPHA2
EGFR interacts with phospholipase C-gamma_Homo sapiens_R-HSA-212718	1934-01-01	0.168272	0.232703	0.157626	0.216372	2.07799	-3.70333	EGFR
Regulation of TP53 Degradation_Homo sapiens_R-HSA-6804757	1935-01-01	0.172771	0.237162	0.161752	0.22041	1.60569	-2.81925	AKT2
Lysosome Vesicle Biogenesis_Homo sapiens_R-HSA-432720	1935-01-01	0.172771	0.237162	0.161752	0.22041	1.98282	-3.48142	APP
Toll-Like Receptors Cascades_Homo sapiens_R-HSA-168898	2/140	0.174936	0.239251	0.152211	0.212069	0.0999657	-0.174274	APP;HMGB1
M Phase_Homo sapiens_R-HSA-68886	3/268	0.176714	0.240641	0.145218	0.206977	-0.0156182	0.0270698	PTTG1;UBE2C;BIRC5
Regulation of TP53 Expression and Degradation_Homo sapiens_R-HSA-6806003	1936-01-01	0.177246	0.240641	0.165859	0.225181	1.6104	-2.78635	AKT2
Platelet Aggregation (Plug Formation)_Homo sapiens_R-HSA-76009	1937-01-01	0.181697	0.245786	0.169946	0.229058	1.83147	-3.12342	TLN1
mTOR signalling_Homo sapiens_R-HSA-165159	1939-01-01	0.190527	0.25587	0.178062	0.237416	1.73099	-2.86991	AKT2
Collagen degradation_Homo sapiens_R-HSA-1442490	1939-01-01	0.190527	0.25587	0.178062	0.237416	1.91368	-3.17281	MMP13
PKB-mediated events_Homo sapiens_R-HSA-109703	1940-01-01	0.194907	0.260811	0.18209	0.24192	1.69939	-2.7789	AKT2
Host Interactions with Influenza Factors_Homo sapiens_R-HSA-168253	1941-01-01	0.199263	0.265684	0.1861	0.246367	1.64073	-2.6467	TGFB1
Deactivation of the beta-catenin transactivating complex_Homo sapiens_R-HSA-3769402	1942-01-01	0.203596	0.268573	0.19009	0.248117	1.39902	-2.22671	AKT2
Intrinsic Pathway for Apoptosis_Homo sapiens_R-HSA-109606	1942-01-01	0.203596	0.268573	0.19009	0.248117	1.46459	-2.33107	AKT2
EPHB-mediated forward signaling_Homo sapiens_R-HSA-3928662	1942-01-01	0.203596	0.268573	0.19009	0.248117	1.56332	-2.4882	TIAM1
TP53 Regulates Transcription of Cell Death Genes_Homo sapiens_R-HSA-5633008	1943-01-01	0.207906	0.273289	0.194061	0.250662	1.52707	-2.39853	BIRC5
Transcriptional activity of SMAD2/SMAD3:SMAD4 heterotrimer_Homo sapiens_R-HSA-2173793	1944-01-01	0.212192	0.276967	0.198013	0.25313	1.36558	-2.11701	MYC
SUMOylation of DNA replication proteins_Homo sapiens_R-HSA-4615885	1944-01-01	0.212192	0.276967	0.198013	0.25313	1.42953	-2.21614	BIRC5
Cellular Senescence_Homo sapiens_R-HSA-2559583	2/161	0.216008	0.280563	0.188667	0.248117	0.207965	-0.318693	UBE2C;BMI1
SUMOylation of RNA binding proteins_Homo sapiens_R-HSA-4570464	1945-01-01	0.216456	0.280563	0.201946	0.257274	1.38414	-2.11824	BMI1
Apoptosis_Homo sapiens_R-HSA-109581	2/163	0.219971	0.28413	0.192205	0.24913	0.259993	-0.393696	AKT2;HMGB1
NOTCH1 Intracellular Domain Regulates Transcription_Homo sapiens_R-HSA-2122947	1947-01-01	0.224914	0.288511	0.209756	0.264506	1.30283	-1.94387	MYC
Nucleotide-binding domain, leucine rich repeat containing receptor (NLR) signaling pathways_Homo sapiens_R-HSA-168643	1947-01-01	0.224914	0.288511	0.209756	0.264506	1.45374	-2.16904	APP
Programmed Cell Death_Homo sapiens_R-HSA-5357801	2/166	0.225928	0.288815	0.197531	0.25313	0.266674	-0.396689	AKT2;HMGB1
Adaptive Immune System_Homo sapiens_R-HSA-1280218	6/762	0.229845	0.291817	0.167939	0.227176	0.194608	-0.286141	PDGFRA;ITGB5;UBE2C;AKT2;ERBB2;EGFR
G beta:gamma signalling through PI3Kgamma_Homo sapiens_R-HSA-392451	1948-01-01	0.22911	0.291817	0.213632	0.268484	1.25335	-1.84688	AKT2
Cell Cycle, Mitotic_Homo sapiens_R-HSA-69278	4/462	0.239725	0.301546	0.190992	0.248423	0.177239	-0.253144	PTTG1;UBE2C;MYC;BIRC5
G-protein beta:gamma signalling_Homo sapiens_R-HSA-397795	1951-01-01	0.241561	0.301546	0.225152	0.279188	1.20995	-1.71889	AKT2
Aquaporin-mediated transport_Homo sapiens_R-HSA-445717	1951-01-01	0.241561	0.301546	0.225152	0.279188	1.36704	-1.94206	AQP5
Cargo trafficking to the periciliary membrane_Homo sapiens_R-HSA-5620920	1951-01-01	0.241561	0.301546	0.225152	0.279188	1.43164	-2.03384	PDE6D
Apoptotic execution phase_Homo sapiens_R-HSA-75153	1951-01-01	0.241561	0.301546	0.225152	0.279188	1.58178	-2.24712	HMGB1
GPVI-mediated activation cascade_Homo sapiens_R-HSA-114604	1953-01-01	0.249751	0.308662	0.232739	0.285739	1.23084	-1.70753	AKT2
Arachidonic acid metabolism_Homo sapiens_R-HSA-2142753	1953-01-01	0.249751	0.308662	0.232739	0.285739	1.39972	-1.94182	GPX2
XBP1(S) activates chaperone genes_Homo sapiens_R-HSA-381038	1953-01-01	0.249751	0.308662	0.232739	0.285739	1.44408	-2.00336	TLN1
IRE1alpha activates chaperones_Homo sapiens_R-HSA-381070	1955-01-01	0.257854	0.317621	0.240254	0.293995	1.38245	-1.87372	TLN1
Degradation of DVL_Homo sapiens_R-HSA-4641258	1956-01-01	0.261872	0.321506	0.243985	0.297078	1.10988	-1.48712	DVL1
Signaling by GPCR_Homo sapiens_R-HSA-372790	9/1293	0.263655	0.32263	0.175411	0.23557	0.274918	-0.366497	PDGFRA;APP;TIAM1;AKT2;ERBB2;TLN1;ECT2;EGFR;VCL
Formation of the beta-catenin:TCF transactivating complex_Homo sapiens_R-HSA-201722	1958-01-01	0.269845	0.329122	0.251392	0.304618	1.24207	-1.62699	MYC
Translocation of GLUT4 to the plasma membrane_Homo sapiens_R-HSA-1445148	1960-01-01	0.277732	0.337635	0.258728	0.31249	1.30706	-1.67447	AKT2
Autodegradation of Cdh1 by Cdh1:APC/C_Homo sapiens_R-HSA-174084	1962-01-01	0.285535	0.345991	0.265995	0.320226	0.944236	-1.1835	UBE2C
Transcriptional Regulation by TP53_Homo sapiens_R-HSA-3700989	3/348	0.29027	0.350586	0.244371	0.297078	0.257576	-0.318607	GPX2;AKT2;BIRC5
Cyclin E associated events during G1/S transition_Homo sapiens_R-HSA-69202	1968-01-01	0.308447	0.370136	0.287378	0.341548	0.902966	-1.06207	MYC
Amyloid fiber formation_Homo sapiens_R-HSA-977225	1968-01-01	0.308447	0.370136	0.287378	0.341548	1.03044	-1.21201	APP
Cyclin A:Cdk2-associated events at S phase entry_Homo sapiens_R-HSA-69656	1969-01-01	0.312194	0.373428	0.290882	0.343518	0.898195	-1.04562	MYC
Clathrin derived vesicle budding_Homo sapiens_R-HSA-421837	1970-01-01	0.315921	0.375471	0.294369	0.345443	1.18063	-1.3604	APP
trans-Golgi Network Vesicle Budding_Homo sapiens_R-HSA-199992	1970-01-01	0.315921	0.375471	0.294369	0.345443	1.19129	-1.37268	APP
Cellular responses to stress_Homo sapiens_R-HSA-2262752	3/367	0.318316	0.376271	0.269541	0.32345	0.313801	-0.359211	GPX2;UBE2C;BMI1
Cdc20:Phospho-APC/C mediated degradation of Cyclin A_Homo sapiens_R-HSA-174184	1971-01-01	0.319628	0.376271	0.29784	0.347324	0.855741	-0.976057	UBE2C
Lipid digestion, mobilization, and transport_Homo sapiens_R-HSA-73923	1971-01-01	0.319628	0.376271	0.29784	0.347324	1.13348	-1.29285	FABP1
APC:Cdc20 mediated degradation of cell cycle proteins prior to satisfation of the cell cycle checkpoint_Homo sapiens_R-HSA-179419	1972-01-01	0.323315	0.378217	0.301294	0.34898	0.84326	-0.952149	UBE2C
Costimulation by the CD28 family_Homo sapiens_R-HSA-388841	1972-01-01	0.323315	0.378217	0.301294	0.34898	1.01022	-1.14067	AKT2
Fatty acid, triacylglycerol, and ketone body metabolism_Homo sapiens_R-HSA-535734	2/217	0.327654	0.382092	0.28981	0.343342	0.36709	-0.409599	FABP1;UGT1A9
SUMOylation of DNA damage response and repair proteins_Homo sapiens_R-HSA-3108214	1975-01-01	0.334258	0.388575	0.311556	0.35882	1.02605	-1.12439	BMI1
Senescence-Associated Secretory Phenotype (SASP)_Homo sapiens_R-HSA-2559582	1977-01-01	0.341455	0.395705	0.318316	0.365474	0.945705	-1.0162	UBE2C
Regulation of APC/C activators between G1/S and early anaphase_Homo sapiens_R-HSA-176408	1979-01-01	0.348576	0.400217	0.32501	0.369737	0.859642	-0.905976	UBE2C
PI3K Cascade_Homo sapiens_R-HSA-109704	1979-01-01	0.348576	0.400217	0.32501	0.369737	1.01686	-1.07167	AKT2
Transcriptional regulation of white adipocyte differentiation_Homo sapiens_R-HSA-381340	1979-01-01	0.348576	0.400217	0.32501	0.369737	1.03047	-1.08601	TGFB1
Signal Transduction_Homo sapiens_R-HSA-162582	15/2465	0.351681	0.401792	0.206028	0.261579	0.51612	-0.539361	PDGFRA;APP;TGFB1;EGFR;DLL4;TIAM1;AKT2;MYC;DVL1;ERBB2;BIRC5;TLN1;ECT2;LGR5;VCL
Complement cascade_Homo sapiens_R-HSA-166658	1980-01-01	0.352108	0.401792	0.328334	0.372378	1.07911	-1.12639	CLU
Antigen processing-Cross presentation_Homo sapiens_R-HSA-1236975	1982-01-01	0.359114	0.408534	0.334932	0.378707	0.856113	-0.876758	ITGB5
Metabolism of proteins_Homo sapiens_R-HSA-392499	7/1074	0.360491	0.40885	0.271141	0.324323	0.473344	-0.482947	APP;MUC1;MUC2;BIRC5;MUC13;TLN1;BMI1
Cell Cycle_Homo sapiens_R-HSA-1640170	4/566	0.365586	0.413368	0.302074	0.34898	0.494328	-0.497419	PTTG1;UBE2C;MYC;BIRC5
Unfolded Protein Response (UPR)_Homo sapiens_R-HSA-381119	1986-01-01	0.372903	0.420363	0.34794	0.392223	0.986224	-0.972848	TLN1
Metabolism of nucleotides_Homo sapiens_R-HSA-15869	1987-01-01	0.376304	0.422915	0.351152	0.394649	0.970833	-0.948852	TK1
PCP/CE pathway_Homo sapiens_R-HSA-4086400	1991-01-01	0.389726	0.435369	0.36385	0.405246	0.822917	-0.775445	DVL1
Oxidative Stress Induced Senescence_Homo sapiens_R-HSA-2559580	1991-01-01	0.389726	0.435369	0.36385	0.405246	0.823795	-0.776272	BMI1
MAPK6/MAPK4 signaling_Homo sapiens_R-HSA-5687128	1992-01-01	0.393036	0.437753	0.366986	0.407519	0.704431	-0.657835	MYC
Interferon gamma signaling_Homo sapiens_R-HSA-877300	1993-01-01	0.396329	0.440103	0.370107	0.409761	1.01252	-0.9371	CD44
RHO GTPase Effectors_Homo sapiens_R-HSA-195258	2/255	0.401385	0.444391	0.358327	0.401499	0.48368	-0.441519	DVL1;BIRC5
L1CAM interactions_Homo sapiens_R-HSA-373760	1996-01-01	0.406101	0.448278	0.37938	0.418782	0.925178	-0.833726	EGFR
Resolution of Sister Chromatid Cohesion_Homo sapiens_R-HSA-2500257	1999-01-01	0.415717	0.456185	0.38852	0.426341	0.827027	-0.725923	BIRC5
Transport of inorganic cations/anions and amino acids/oligopeptides_Homo sapiens_R-HSA-425393	1999-01-01	0.415717	0.456185	0.38852	0.426341	0.89844	-0.788606	SLC26A3
Phase II conjugation_Homo sapiens_R-HSA-156580	1/100	0.418888	0.458313	0.391538	0.428388	0.932698	-0.811589	UGT1A9
Mitotic Prometaphase_Homo sapiens_R-HSA-68877	1/107	0.440611	0.480667	0.412255	0.449733	0.787698	-0.645591	BIRC5
G1/S Transition_Homo sapiens_R-HSA-69206	1/112	0.455634	0.495601	0.426629	0.464053	0.775342	-0.609471	MYC
Glycosaminoglycan metabolism_Homo sapiens_R-HSA-1630316	1/121	0.481673	0.522398	0.451642	0.488404	0.777356	-0.56785	CD44
S Phase_Homo sapiens_R-HSA-69242	1/124	0.490076	0.529966	0.459741	0.49572	0.739549	-0.527443	MYC
Class I MHC mediated antigen processing & presentation_Homo sapiens_R-HSA-983169	2/305	0.492241	0.530764	0.444798	0.482404	0.586917	-0.415999	ITGB5;UBE2C
Mitotic G1-G1/S phases_Homo sapiens_R-HSA-453279	1/136	0.522358	0.56161	0.490981	0.527875	0.706967	-0.459106	MYC
Beta-catenin independent WNT signaling_Homo sapiens_R-HSA-3858494	1/144	0.542746	0.581848	0.510819	0.547622	0.704259	-0.430383	DVL1
Influenza Infection_Homo sapiens_R-HSA-168254	1/147	0.550167	0.588109	0.518062	0.552204	0.714315	-0.426827	TGFB1
Regulation of TP53 Activity_Homo sapiens_R-HSA-5633007	1/151	0.559876	0.596774	0.527557	0.560717	0.742515	-0.430688	AKT2
Infectious disease_Homo sapiens_R-HSA-5663205	2/348	0.563201	0.598603	0.514056	0.549508	0.646837	-0.37136	TGFB1;CD9
Cell Cycle Checkpoints_Homo sapiens_R-HSA-69620	1/182	0.628409	0.666006	0.595194	0.629011	0.741092	-0.344285	UBE2C
Assembly of the primary cilium_Homo sapiens_R-HSA-5617833	1/187	0.638425	0.6747	0.605177	0.63775	0.7552	-0.338896	PDE6D
Generic Transcription Pathway_Homo sapiens_R-HSA-212436	4/812	0.643579	0.678219	0.572593	0.606851	0.604915	-0.266593	GPX2;AKT2;MYC;BIRC5
G alpha (q) signalling events_Homo sapiens_R-HSA-416476	1/191	0.646246	0.679105	0.61299	0.644159	0.727903	-0.317785	APP
Peptide ligand-binding receptors_Homo sapiens_R-HSA-375276	1/193	0.650092	0.681224	0.61684	0.644853	0.711257	-0.306296	APP
Interferon Signaling_Homo sapiens_R-HSA-913531	1/196	0.655785	0.685259	0.622545	0.648702	0.837444	-0.353336	CD44
Biological oxidations_Homo sapiens_R-HSA-211859	1/199	0.661386	0.689176	0.628166	0.652731	0.72172	-0.298371	UGT1A9
Membrane Trafficking_Homo sapiens_R-HSA-199991	2/420	0.665657	0.691688	0.617118	0.644853	0.705834	-0.287261	APP;AKT2
Metabolism of lipids and lipoproteins_Homo sapiens_R-HSA-556833	3/659	0.695315	0.720494	0.636688	0.659743	0.629641	-0.228805	FABP1;GPX2;UGT1A9
G alpha (i) signalling events_Homo sapiens_R-HSA-418594	1/240	0.729467	0.753782	0.697264	0.720506	0.742167	-0.23411	APP
Vesicle-mediated transport_Homo sapiens_R-HSA-5653656	2/492	0.74806	0.770854	0.703155	0.724581	0.717958	-0.208403	APP;AKT2
Antigen processing: Ubiquitination & Proteasome degradation_Homo sapiens_R-HSA-983168	1/260	0.757566	0.778493	0.726247	0.744253	0.73512	-0.204102	UBE2C
SLC-mediated transmembrane transport_Homo sapiens_R-HSA-425407	1/268	0.767978	0.787018	0.737064	0.753264	0.744578	-0.196565	SLC26A3
Metabolism of carbohydrates_Homo sapiens_R-HSA-71387	1/282	0.785143	0.800201	0.754999	0.769478	0.716976	-0.173429	CD44
GPCR downstream signaling_Homo sapiens_R-HSA-388396	4/983	0.783516	0.800201	0.724728	0.744253	0.722665	-0.176304	APP;TIAM1;AKT2;ECT2
Class A/1 (Rhodopsin-like receptors)_Homo sapiens_R-HSA-373076	1/323	0.828504	0.842086	0.800918	0.81183	0.696744	-0.131081	APP
Organelle biogenesis and maintenance_Homo sapiens_R-HSA-1852241	1/326	0.831313	0.842639	0.803926	0.812665	0.738051	-0.136354	PDE6D
Transmembrane transport of small molecules_Homo sapiens_R-HSA-382551	2/594	0.834844	0.843919	0.7977	0.810777	0.780581	-0.140903	AQP5;SLC26A3
Metabolism of amino acids and derivatives_Homo sapiens_R-HSA-71291	1/335	0.839468	0.846293	0.812687	0.819294	0.730103	-0.127759	PSAT1
GPCR ligand binding_Homo sapiens_R-HSA-500792	1/447	0.913517	0.918455	0.894366	0.8992	0.673589	-0.0609281	APP
Gene Expression_Homo sapiens_R-HSA-74160	5/1631	0.946002	0.948552	0.921459	0.923943	0.847154	-0.0470257	GPX2;AKT2;MYC;BIRC5;CD44
Metabolism_Homo sapiens_R-HSA-1430728	1908-06-01	0.952178	0.952178	0.928775	0.928775	0.826393	-0.0404956	FABP1;GPX2;PSAT1;TK1;UGT1A9;CD44

## Sheet: CTC cellular component
Term	Overlap	P-value	Adjusted P-value	Old P-value	Old Adjusted P-value	Z-score	Combined Score	Genes
platelet alpha granule (GO:0031091)	1991-05-01	0.000134523	0.00546526	0.000190937	0.00759185	-1.63858	14.6059	APP;TGFB1;CD9;TIMP1;CLU
Golgi lumen (GO:0005796)	1999-05-01	0.000199948	0.00546526	0.000277751	0.00759185	-1.25284	10.671	APP;MUC1;TGFB1;MUC2;MUC13
focal adhesion (GO:0005925)	9/357	0.00013776	0.00546526	0.000171917	0.00759185	-1.12488	10.0002	ITGB5;CD9;RSU1;TLN1;CD44;EGFR;VCL;EPHA2;LIMS1
platelet alpha granule lumen (GO:0031093)	1968-04-01	0.000502054	0.0102921	0.000688537	0.0119821	-1.95758	14.8714	APP;TGFB1;TIMP1;CLU
integral component of plasma membrane (GO:0005887)	18/1464	0.000819335	0.0134371	0.000730614	0.0119821	-1.63777	11.6397	PDGFRA;CHRNB1;APP;AQP5;DCLK1;EGFR;MUC1;TSPAN8;GPA33;EPCAM;CEACAM5;ERBB2;CD9;MET;LGR5;SLC26A3;CD44;EPHA2
microvillus (GO:0005902)	1943-03-01	0.00161509	0.0199607	0.00214726	0.0251536	-1.59771	10.2707	VIL1;TGFB1;CD44
secretory granule lumen (GO:0034774)	7/318	0.00170396	0.0199607	0.00211163	0.0251536	-1.25942	8.02853	APP;TGFB1;HMGB1;TIMP1;OLFM4;CLU;VCL
actin-based cell projection (GO:0098858)	1971-03-01	0.00670675	0.0687442	0.00821369	0.0841903	-1.87543	9.38583	VIL1;TGFB1;CD44
endosomal part (GO:0044440)	1932-02-01	0.0128945	0.117483	0.0155299	0.141495	-1.68868	7.34736	APP;EGFR
nuclear ubiquitin ligase complex (GO:0000152)	1942-02-01	0.0216158	0.177249	0.0252724	0.207234	-1.51873	5.82332	UBE2C;BMI1
chromosome, centromeric region (GO:0000775)	1950-02-01	0.0299107	0.222971	0.0344335	0.256686	-2.13254	7.48422	FAM172A;BIRC5
messenger ribonucleoprotein complex (GO:1990124)	2019-01-08	0.0423996	0.24381	0.0495626	0.277635	-2.61202	8.2556	PKP3
apical dendrite (GO:0097440)	2019-01-09	0.0475727	0.24381	0.0549187	0.277635	-2.33702	7.1174	CLU
lamellipodium membrane (GO:0031258)	2019-01-09	0.0475727	0.24381	0.0549187	0.277635	-1.91818	5.84181	CD44
specific granule lumen (GO:0035580)	1963-02-01	0.0455886	0.24381	0.0515904	0.277635	-1.87147	5.77927	OLFM4;VCL
spherical high-density lipoprotein particle (GO:0034366)	2019-01-09	0.0475727	0.24381	0.0549187	0.277635	-1.69708	5.16846	CLU
filopodium tip (GO:0032433)	2019-01-11	0.057836	0.249505	0.0655424	0.277635	-2.30431	6.56762	VIL1
PRC1 complex (GO:0035102)	2019-01-13	0.0679897	0.249505	0.076049	0.277635	-2.34853	6.31377	BMI1
AP-2 adaptor complex (GO:0030122)	2019-01-14	0.0730258	0.249505	0.0812589	0.277635	-2.4062	6.2969	EGFR
clathrin coat of endocytic vesicle (GO:0030128)	2019-01-14	0.0730258	0.249505	0.0812589	0.277635	-2.40482	6.29327	EGFR
specific granule (GO:0042581)	3/161	0.0567018	0.249505	0.0644769	0.277635	-1.45006	4.16161	CD47;OLFM4;VCL
chromosomal region (GO:0098687)	1977-02-01	0.06509	0.249505	0.0727528	0.277635	-1.50551	4.11304	FAM172A;BIRC5
clathrin-coated vesicle membrane (GO:0030665)	1982-02-01	0.0726225	0.249505	0.0808892	0.277635	-1.37422	3.60386	CD9;EGFR
bicellular tight junction (GO:0005923)	1973-02-01	0.059269	0.249505	0.0664519	0.277635	-1.25389	3.54308	EPCAM;ECT2
trans-Golgi network membrane (GO:0032588)	1986-02-01	0.0788409	0.258598	0.0875934	0.287306	-1.39076	3.53298	APP;LGR5
clathrin adaptor complex (GO:0030131)	2019-01-18	0.0929021	0.272071	0.101812	0.298164	-2.33285	5.54333	EGFR
platelet alpha granule membrane (GO:0031092)	2019-01-18	0.0929021	0.272071	0.101812	0.298164	-1.96607	4.6718	CD9
acetylcholine-gated channel complex (GO:0005892)	2019-01-18	0.0929021	0.272071	0.101812	0.298164	-1.89495	4.5028	CHRNB1
chromosome (GO:0005694)	1998-02-01	0.0984198	0.278291	0.108636	0.305912	-1.64608	3.81646	BIRC5;HMGB1
condensed chromosome kinetochore (GO:0000777)	2019-01-20	0.102681	0.280662	0.111919	0.305912	-1.98833	4.52569	BIRC5
anaphase-promoting complex (GO:0005680)	2019-01-22	0.112356	0.2972	0.121915	0.322484	-1.77173	3.87314	UBE2C
intrinsic component of external side of plasma membrane (GO:0031233)	2019-01-23	0.117155	0.300209	0.126871	0.325107	-1.80698	3.87463	CEACAM5
endosome lumen (GO:0031904)	2019-01-25	0.126675	0.314768	0.136702	0.339683	-1.91182	3.95006	APP
condensed chromosome, centromeric region (GO:0000779)	2019-01-27	0.136093	0.321568	0.146424	0.351749	-1.74343	3.47712	BIRC5
membrane raft (GO:0045121)	2/120	0.137255	0.321568	0.150137	0.351749	-1.13154	2.24714	APP;EGFR
ficolin-1-rich granule lumen (GO:1904813)	2/124	0.144641	0.32946	0.158	0.359889	-1.62549	3.14289	HMGB1;VCL
perinuclear region of cytoplasm (GO:0048471)	4/379	0.149197	0.330654	0.167853	0.366711	-1.21918	2.31947	APP;OLFM4;CLU;LIMS1
nuclear chromatin (GO:0000790)	3/254	0.1583	0.332835	0.175433	0.368209	-1.31967	2.43251	MUC1;ZEB2;MYC
cytoplasmic vesicle lumen (GO:0060205)	2/130	0.155871	0.332835	0.169939	0.366711	-1.18896	2.20995	HMGB1;VCL
clathrin-coated endocytic vesicle membrane (GO:0030669)	1934-01-01	0.168272	0.344958	0.179614	0.368209	-1.73142	3.08568	CD9
endoplasmic reticulum lumen (GO:0005788)	3/271	0.180737	0.361473	0.199637	0.399275	-1.02217	1.74864	BMP4;APP;TIMP1
peroxisomal matrix (GO:0005782)	1943-01-01	0.207906	0.377825	0.220435	0.401682	-1.6273	2.55595	FABP1
condensed chromosome (GO:0000793)	1941-01-01	0.199263	0.377825	0.211539	0.401682	-1.41554	2.28345	HMGB1
microbody lumen (GO:0031907)	1943-01-01	0.207906	0.377825	0.220435	0.401682	-1.34666	2.11515	FABP1
anchored component of plasma membrane (GO:0046658)	1941-01-01	0.199263	0.377825	0.211539	0.401682	-1.28323	2.07002	PRSS22
chromatin (GO:0000785)	3/297	0.216558	0.377825	0.2381	0.411353	-1.06573	1.63046	MUC1;ZEB2;MYC
actin cytoskeleton (GO:0015629)	3/295	0.213748	0.377825	0.235091	0.411353	-0.842235	1.29953	VIL1;PLS3;CAP2
nuclear chromosome (GO:0000228)	1953-01-01	0.249751	0.382464	0.26346	0.411353	-1.45882	2.02381	BIRC5
ruffle membrane (GO:0032587)	1954-01-01	0.253813	0.382464	0.267632	0.411353	-1.3859	1.90029	AKT2
tertiary granule (GO:0070820)	2/165	0.223941	0.382464	0.241924	0.411353	-1.18807	1.7778	CD47;OLFM4
cortical cytoskeleton (GO:0030863)	1953-01-01	0.249751	0.382464	0.26346	0.411353	-1.235	1.7133	CAP2
clathrin-coated endocytic vesicle (GO:0045334)	1951-01-01	0.241561	0.382464	0.255045	0.411353	-1.19108	1.69208	CD9
cortical actin cytoskeleton (GO:0030864)	1953-01-01	0.249751	0.382464	0.26346	0.411353	-1.20768	1.6754	CAP2
tertiary granule lumen (GO:1904724)	1956-01-01	0.261872	0.382464	0.275908	0.411353	-1.21274	1.62494	OLFM4
actin filament (GO:0005884)	1956-01-01	0.261872	0.382464	0.275908	0.411353	-1.11584	1.49511	PLS3
trans-Golgi network (GO:0005802)	2/186	0.265859	0.382464	0.285959	0.41138	-0.885669	1.17332	APP;LGR5
ficolin-1-rich granule (GO:0101002)	2/185	0.263858	0.382464	0.283862	0.41138	-0.872356	1.16228	HMGB1;VCL
filopodium (GO:0030175)	1961-01-01	0.281644	0.398187	0.296197	0.418761	-1.11497	1.41278	VIL1
early endosome membrane (GO:0031901)	1974-01-01	0.33063	0.444453	0.346379	0.467905	-1.10917	1.22758	EGFR
tertiary granule membrane (GO:0070821)	1974-01-01	0.33063	0.444453	0.346379	0.467905	-0.92781	1.02686	CD47
cytoplasmic vesicle (GO:0031410)	2/216	0.325676	0.444453	0.348434	0.467905	-0.801433	0.899091	DVL1;PDE6D
peroxisomal part (GO:0044439)	1976-01-01	0.337866	0.446855	0.353782	0.467905	-0.971804	1.05451	FABP1
nuclear chromosome part (GO:0044454)	3/393	0.356755	0.464348	0.386679	0.487811	-0.674965	0.695691	MUC1;ZEB2;MYC
phagocytic vesicle (GO:0045335)	1984-01-01	0.366046	0.466117	0.382579	0.487811	-0.998358	1.00335	ITGB5
mitotic spindle (GO:0072686)	1985-01-01	0.369483	0.466117	0.38609	0.487811	-0.94434	0.940232	ECT2
specific granule membrane (GO:0035579)	1992-01-01	0.393036	0.488318	0.410119	0.509542	-1.08831	1.01633	CD47
clathrin-coated vesicle (GO:0030136)	1/101	0.422042	0.516529	0.439664	0.538096	-0.933057	0.804903	EGFR
endocytic vesicle (GO:0030139)	1/109	0.446669	0.53863	0.464705	0.56038	-0.773554	0.623437	ITGB5
axon (GO:0030424)	1/142	0.537731	0.639043	0.556911	0.661836	-0.879022	0.545343	APP
cullin-RING ubiquitin ligase complex (GO:0031461)	1/182	0.628409	0.736136	0.647996	0.759081	-0.870307	0.404313	UBE2C
spindle (GO:0005819)	1/187	0.638425	0.737336	0.658004	0.759948	-0.727124	0.326297	ECT2
dendrite (GO:0030425)	1/216	0.691462	0.768681	0.710782	0.790114	-0.789052	0.291118	CLU
early endosome (GO:0005769)	1/223	0.703062	0.768681	0.722275	0.790114	-0.702114	0.247362	EGFR
Golgi membrane (GO:0000139)	2/443	0.694081	0.768681	0.722666	0.790114	-0.613483	0.224023	APP;LGR5
polymeric cytoskeletal fiber (GO:0099513)	1/222	0.701432	0.768681	0.720661	0.790114	-0.609602	0.216184	PLS3
cytoskeleton (GO:0005856)	2/521	0.776041	0.837307	0.802451	0.865803	-0.535424	0.135757	CLU;VCL
nucleoplasm part (GO:0044451)	1/408	0.892689	0.938468	0.906055	0.952519	-0.655558	0.0744172	BMI1
nucleolus (GO:0005730)	2/677	0.884631	0.938468	0.904465	0.952519	-0.482399	0.0591348	ZEB2;MYC
centrosome (GO:0005813)	1/462	0.920414	0.955367	0.931848	0.967234	-0.57742	0.0478861	RANBP3
microtubule organizing center (GO:0005815)	1/508	0.938345	0.961803	0.948238	0.971943	-0.720621	0.0458588	RANBP3
nuclear body (GO:0016604)	1/619	0.966783	0.978718	0.973518	0.985537	-0.48957	0.0165385	BMI1
mitochondrion (GO:0005739)	1/1027	0.996684	0.996684	0.997923	0.997923	-0.529323	0.00175823	CLU
Term	Overlap	P-value	Adjusted P-value	Old P-value	Old Adjusted P-value	Z-score	Combined Score	Genes

## Sheet: CTC biological process
Term	Overlap	P-value	Adjusted P-value	Old P-value	Old Adjusted P-value	Z-score	Combined Score	Genes
positive regulation of cell proliferation (GO:0008284)	16/425	1.11351e-09	1.39411e-06	3.11216e-11	3.89642e-08	-1.56383	32.2394	PDGFRA;TGFB1;BMI1;EGFR;BMP6;DLL4;BMP4;TIAM1;EPCAM;AKT2;MYC;TBX20;ERBB2;BIRC5;CD47;TIMP1
cellular response to growth factor stimulus (GO:0071363)	9/140	6.77447e-08	4.24082e-05	1.28257e-08	5.35259e-06	-1.4255	23.5315	VIL1;DLL4;BMP4;TGFB1;ERBB2;CD44;EGFR;BMP6;LIMS1
regulation of apoptotic process (GO:0042981)	18/816	3.58638e-07	0.000145612	6.67007e-09	4.17546e-06	-1.78828	26.5397	PDGFRA;TGFB1;HMGB1;CLU;EGFR;BMP6;FABP1;BMP4;TIAM1;CEACAM5;AKT2;MYC;ERBB2;BIRC5;ECT2;MET;CD44;EPHA2
negative regulation of response to stimulus (GO:0048585)	8/128	4.65215e-07	0.000145612	1.07805e-07	3.3743e-05	-1.33885	19.5214	PDGFRA;TGFB1;ERBB2;TWIST1;MET;CLU;EGFR;EPHA2
positive regulation of transferase activity (GO:0051347)	8/138	8.25738e-07	0.000206765	1.86661e-07	3.54198e-05	-1.20831	16.9248	PDGFRA;TGFB1;MYC;ERBB2;BMI1;MET;EGFR;EPHA2
regulation of epithelial cell proliferation (GO:0050678)	1973-06-01	2.73559e-06	0.000285413	1.04229e-06	9.57612e-05	-2.21895	28.4228	BMP4;TGFB1;MYC;ERBB2;EGFR;BMP6
positive regulation of phosphorylation (GO:0042327)	9/209	2.00177e-06	0.000285413	3.39248e-07	3.90566e-05	-1.93745	25.4222	BMP4;PDGFRA;APP;TGFB1;AKT2;ERBB2;MET;EGFR;EPHA2
positive regulation of protein phosphorylation (GO:0001934)	12/413	2.39497e-06	0.000285413	1.98034e-07	3.54198e-05	-1.89304	24.4999	BMP4;PDGFRA;APP;TGFB1;AKT2;ERBB2;HMGB1;MET;CD44;EGFR;BMP6;EPHA2
positive regulation of macromolecule metabolic process (GO:0010604)	10/277	2.59249e-06	0.000285413	3.43149e-07	3.90566e-05	-1.83934	23.6592	DLL4;BMP4;APP;TGFB1;MYC;AGR2;TWIST1;PKP3;CLU;LIMS1
positive regulation of ERK1 and ERK2 cascade (GO:0070374)	9/202	1.51065e-06	0.000285413	2.57389e-07	3.87847e-05	-1.71408	22.9738	PDGFRA;APP;TGFB1;ERBB2;HMGB1;MET;CD44;EGFR;EPHA2
regulation of MAPK cascade (GO:0043408)	9/204	1.63899e-06	0.000285413	2.78804e-07	3.87847e-05	-1.37208	18.278	BMP4;PDGFRA;TGFB1;ERBB2;HMGB1;MET;EGFR;BMP6;EPHA2
negative regulation of programmed cell death (GO:0043069)	12/409	2.16599e-06	0.000285413	1.78834e-07	3.54198e-05	-1.27283	16.601	FABP1;BMP4;PDGFRA;CEACAM5;AKT2;MYC;ERBB2;BIRC5;MET;CD44;EGFR;EPHA2
branching morphogenesis of an epithelial tube (GO:0048754)	1944-05-01	3.84136e-06	0.000369953	2.00443e-06	0.00014762	-1.87017	23.3204	DLL4;BMP4;MYC;MET;EPHA2
aortic valve development (GO:0003176)	2019-03-07	5.27599e-06	0.000388561	8.7538e-06	0.00039142	-3.56994	43.3831	BMP4;TBX20;TWIST1
aortic valve morphogenesis (GO:0003180)	2019-03-07	5.27599e-06	0.000388561	8.7538e-06	0.00039142	-3.05132	37.0807	BMP4;TBX20;TWIST1
platelet degranulation (GO:0002576)	7/125	5.2006e-06	0.000388561	1.43532e-06	0.000112314	-1.42429	17.329	APP;TGFB1;CD9;TIMP1;TLN1;CLU;VCL
regulation of signal transduction (GO:0009966)	9/234	5.04411e-06	0.000388561	8.44124e-07	8.80703e-05	-1.32921	16.2127	PDGFRA;APP;ERBB2;BIRC5;TIMP1;MET;CLU;EGFR;EPHA2
regulation of ERK1 and ERK2 cascade (GO:0070372)	9/248	8.06563e-06	0.000561009	1.34509e-06	0.00011227	-1.05749	12.4021	PDGFRA;APP;TGFB1;ERBB2;HMGB1;MET;CD44;EGFR;EPHA2
positive regulation of protein import into nucleus (GO:0042307)	1954-05-01	1.07169e-05	0.000706186	5.09279e-06	0.000289826	-1.48605	17.0059	BMP4;TGFB1;ECT2;EGFR;BMP6
positive regulation of production of miRNAs involved in gene silencing by miRNA (GO:1903800)	2019-03-09	1.25629e-05	0.000716494	1.59509e-05	0.000624079	-2.66151	30.0345	BMP4;TGFB1;EGFR
positive regulation of macromolecule biosynthetic process (GO:0010557)	7/143	1.25902e-05	0.000716494	3.37362e-06	0.000222304	-1.45492	16.4153	BMP4;PDGFRA;TGFB1;AKT2;MYC;ERBB2;EGFR
negative regulation of apoptotic process (GO:0043066)	12/486	1.24828e-05	0.000716494	1.07081e-06	9.57612e-05	-1.04816	11.835	FABP1;BMP4;PDGFRA;CEACAM5;AKT2;MYC;ERBB2;BIRC5;MET;CD44;EGFR;EPHA2
regulated exocytosis (GO:0045055)	7/149	1.64488e-05	0.000895389	4.37582e-06	0.000273926	-2.26592	24.9597	APP;TGFB1;CD9;TIMP1;TLN1;CLU;VCL
regulation of kinase activity (GO:0043549)	6/102	1.90666e-05	0.00099464	6.51767e-06	0.000354788	-1.29692	14.0943	PDGFRA;ERBB2;ECT2;MET;EGFR;EPHA2
positive regulation of cellular process (GO:0048522)	12/520	2.43524e-05	0.00121957	2.13541e-06	0.00014853	-1.33417	14.1728	BMP4;PDGFRA;TIAM1;TGFB1;EPCAM;AKT2;MYC;ERBB2;BIRC5;CD47;TIMP1;EGFR
positive regulation of cellular biosynthetic process (GO:0031328)	7/160	2.60576e-05	0.00123821	6.85887e-06	0.000357804	-1.86612	19.6973	PDGFRA;ZEB2;AKT2;MYC;ERBB2;CLU;EGFR
positive regulation of cell adhesion (GO:0045785)	1965-05-01	2.67025e-05	0.00123821	1.18761e-05	0.000512719	-1.85785	19.5645	ERBB2;AGR2;CD47;RSU1;LIMS1
positive regulation of MAPK cascade (GO:0043410)	9/290	2.79326e-05	0.00124899	4.66154e-06	0.000277917	-1.09615	11.4939	PDGFRA;APP;TGFB1;ERBB2;HMGB1;MET;CD44;EGFR;EPHA2
extracellular matrix organization (GO:0030198)	8/230	3.55121e-05	0.00153314	7.39477e-06	0.00037033	-1.60873	16.4825	APP;TGFB1;MMP13;ITGB5;LOXL3;CD47;TIMP1;CD44
positive regulation of SMAD protein import into nucleus (GO:0060391)	2019-03-13	4.21052e-05	0.0017005	4.01094e-05	0.00119564	-2.33395	23.5153	BMP4;TGFB1;BMP6
positive regulation of DNA replication (GO:0045740)	1936-04-01	4.14611e-05	0.0017005	2.47091e-05	0.000883879	-2.14567	21.6514	BMP4;PDGFRA;EGFR;BMP6
regulation of production of miRNAs involved in gene silencing by miRNA (GO:1903798)	2019-03-14	5.33778e-05	0.00208841	4.85558e-05	0.00141377	-2.11385	20.7963	BMP4;TGFB1;EGFR
positive regulation of cell motility (GO:2000147)	7/180	5.5236e-05	0.00209562	1.43613e-05	0.00058001	-1.20343	11.7983	VIL1;PDGFRA;TIAM1;TGFB1;AKT2;TWIST1;EGFR
homotypic cell-cell adhesion (GO:0034109)	1939-04-01	5.7177e-05	0.00210546	3.30478e-05	0.00108884	-1.66918	16.3068	PDGFRA;CEACAM5;TLN1;VCL
cell surface receptor signaling pathway involved in heart development (GO:0061311)	2019-03-15	6.64602e-05	0.00237737	5.80895e-05	0.00165291	-2.46243	23.6859	DLL4;BMP4;TGFB1
negative regulation of cell communication (GO:0010648)	1979-05-01	6.86239e-05	0.00238659	2.89357e-05	0.00100632	-1.32478	12.7005	PDGFRA;ERBB2;MET;EGFR;EPHA2
cell-cell junction assembly (GO:0007043)	1980-05-01	7.28866e-05	0.00246632	3.06437e-05	0.00103692	-1.18583	11.2969	CD9;PKP3;TLN1;ECT2;VCL
positive regulation of binding (GO:0051099)	1982-05-01	8.20219e-05	0.00270241	3.42939e-05	0.00110092	-1.28728	12.1114	BMP4;APP;TIAM1;HMGB1;MET
regulation of protein phosphorylation (GO:0001932)	8/262	8.86914e-05	0.00284722	1.84963e-05	0.000701737	-1.13555	10.5951	BMP4;APP;TGFB1;AKT2;ERBB2;ECT2;EGFR;BMP6
negative regulation of signaling (GO:0023057)	1984-05-01	9.20139e-05	0.00288004	3.82728e-05	0.00119564	-1.36506	12.6863	PDGFRA;ERBB2;MET;EGFR;EPHA2
regulation of SMAD protein import into nucleus (GO:0060390)	2019-03-17	9.85465e-05	0.00300927	8.06607e-05	0.00219537	-1.98949	18.353	BMP4;TGFB1;BMP6
regulation of lamellipodium organization (GO:1902743)	2019-03-18	0.000117792	0.00351131	9.38176e-05	0.00234919	-2.25196	20.3725	VIL1;CD44;EPHA2
negative regulation of transcription, DNA-templated (GO:0045892)	14/814	0.000122952	0.00357991	7.86952e-06	0.000378948	-1.69598	15.2701	TGFB1;LOXL3;TWIST1;HMGB1;BMI1;BMP6;DLL4;BMP4;MUC1;ZEB2;MYC;TBX20;BIRC5;LIMS1
regulation of bone mineralization (GO:0030500)	1951-04-01	0.000165286	0.00470315	8.78944e-05	0.00224579	-1.70956	14.8866	BMP4;TGFB1;TWIST1;BMP6
positive regulation of protein localization to membrane (GO:1905477)	1996-05-01	0.000173079	0.00481544	7.02234e-05	0.00195377	-1.24315	10.7678	AKT2;ERBB2;AGR2;EGFR;EPHA2
regulation of cell proliferation (GO:0042127)	13/741	0.000179874	0.00489571	1.43328e-05	0.00058001	-1.09545	9.44635	PDGFRA;APP;TGFB1;EGFR;DLL4;BMP4;TIAM1;EPCAM;AKT2;MYC;BIRC5;CD47;TIMP1
positive regulation of gene silencing by miRNA (GO:2000637)	2019-03-21	0.000189738	0.00501008	0.000141472	0.00322042	-1.87951	16.1071	BMP4;TGFB1;EGFR
positive regulation of cell-substrate adhesion (GO:0010811)	1953-04-01	0.00019208	0.00501008	0.000101151	0.00248316	-1.42426	12.1882	AGR2;RSU1;OLFM4;LIMS1
positive regulation of response to stimulus (GO:0048584)	1955-04-01	0.000221871	0.00566903	0.000115803	0.00278818	-1.35607	11.4092	BMP4;TGFB1;MYC;EGFR
positive regulation of gene expression (GO:0010628)	13/772	0.000267847	0.00644894	2.19663e-05	0.000808878	-1.59871	13.1495	APP;TGFB1;TWIST1;CLU;EGFR;DLL4;BMP4;MYC;DVL1;ERBB2;AGR2;PKP3;LIMS1
regulation of protein kinase B signaling (GO:0051896)	6/164	0.000266327	0.00644894	8.50501e-05	0.00221839	-1.23998	10.206	PDGFRA;TGFB1;ERBB2;MET;EGFR;EPHA2
positive regulation of protein modification process (GO:0031401)	6/164	0.000266327	0.00644894	8.50501e-05	0.00221839	-1.04133	8.57099	BMP4;APP;TGFB1;AKT2;ERBB2;EGFR
positive regulation of intracellular signal transduction (GO:1902533)	10/480	0.00027389	0.00647001	3.94062e-05	0.00119564	-1.52943	12.5456	PDGFRA;APP;TGFB1;ERBB2;HMGB1;ECT2;MET;EGFR;EPHA2;LIMS1
positive regulation of epithelial cell proliferation (GO:0050679)	5/108	0.000299885	0.00695289	0.000119653	0.00282651	-1.2752	10.3445	BMP4;MYC;ERBB2;EGFR;BMP6
negative regulation of intrinsic apoptotic signaling pathway in response to DNA damage (GO:1902230)	2019-03-25	0.000323002	0.00729902	0.000226209	0.00464284	-1.97941	15.9102	MUC1;CLU;CD44
regulation of cell motility (GO:2000145)	5/110	0.000326474	0.00729902	0.000129977	0.00301354	-1.57653	12.6551	TGFB1;AKT2;ERBB2;TWIST1;EGFR
regulation of protein import into nucleus (GO:0042306)	2019-03-26	0.000363702	0.00785094	0.000251542	0.00484509	-2.13327	16.8937	BMP4;TGFB1;ECT2
cellular response to epidermal growth factor stimulus (GO:0071364)	2019-03-26	0.000363702	0.00785094	0.000251542	0.00484509	-1.81183	14.3482	VIL1;ERBB2;EGFR
positive regulation of kinase activity (GO:0033674)	5/114	0.000384972	0.00816924	0.000152664	0.00341312	-1.84653	14.518	PDGFRA;ERBB2;MET;EGFR;EPHA2
response to growth factor (GO:0070848)	2019-03-27	0.000407562	0.00850445	0.000278641	0.00520685	-1.53581	11.9875	MYC;ERBB2;EPHA2
epithelium development (GO:0060429)	5/116	0.000417031	0.0085594	0.000165085	0.00362608	-1.90558	14.8299	VIL1;TGFB1;DVL1;LOXL3;VCL
cellular response to reactive oxygen species (GO:0034614)	1966-04-01	0.000448	0.00904671	0.000225248	0.00464284	-1.38438	10.6746	FABP1;PDGFRA;ECT2;EGFR
positive regulation of fibroblast proliferation (GO:0048146)	2019-03-29	0.000505159	0.00958271	0.000338342	0.00588339	-1.96683	14.9295	PDGFRA;MYC;BMI1
regulation of NIK/NF-kappaB signaling (GO:1901222)	2019-03-29	0.000505159	0.00958271	0.000338342	0.00588339	-1.78343	13.5374	APP;EGFR;LIMS1
regulation of protein localization to plasma membrane (GO:1903076)	1968-04-01	0.000502054	0.00958271	0.000251129	0.00484509	-1.75349	13.3209	TGFB1;AGR2;EGFR;EPHA2
negative regulation of response to DNA damage stimulus (GO:2001021)	2019-03-29	0.000505159	0.00958271	0.000338342	0.00588339	-1.74277	13.2287	TWIST1;CLU;CD44
glandular epithelial cell development (GO:0002068)	2019-02-07	0.000596085	0.0108159	0.000635657	0.00843375	-3.25479	24.1672	BMP4;BMP6
type B pancreatic cell development (GO:0003323)	2019-02-07	0.000596085	0.0108159	0.000635657	0.00843375	-2.90502	21.5701	BMP4;BMP6
positive regulation of endothelial cell migration (GO:0010595)	1971-04-01	0.000591617	0.0108159	0.000293868	0.00541063	-1.54673	11.4963	BMP4;TGFB1;HMGB1;MET
positive regulation of GTPase activity (GO:0043547)	6/193	0.000632602	0.0113145	0.000201424	0.00427429	-1.15102	8.47805	TIAM1;ERBB2;RSU1;ECT2;EPHA2;LIMS1
positive regulation of protein kinase B signaling (GO:0051897)	5/128	0.00065364	0.0115262	0.000256642	0.00486842	-1.16373	8.53359	PDGFRA;TGFB1;ERBB2;MET;EGFR
positive regulation of bone mineralization (GO:0030501)	1932-03-01	0.000677691	0.0116229	0.000442403	0.00727999	-2.18191	15.921	BMP4;TGFB1;BMP6
negative regulation of blood vessel endothelial cell migration (GO:0043537)	1932-03-01	0.000677691	0.0116229	0.000442403	0.00727999	-1.88018	13.7194	DLL4;TGFB1;HMGB1
positive regulation of fatty acid beta-oxidation (GO:0032000)	2019-02-08	0.000791977	0.0126955	0.000792383	0.00992064	-3.70286	26.442	AKT2;TWIST1
pericardium morphogenesis (GO:0003344)	2019-02-08	0.000791977	0.0126955	0.000792383	0.00992064	-3.15371	22.5206	DLL4;TBX20
negative regulation of striated muscle tissue development (GO:0045843)	2019-02-08	0.000791977	0.0126955	0.000792383	0.00992064	-2.68796	19.1946	BMP4;TGFB1
platelet aggregation (GO:0070527)	1934-03-01	0.000811217	0.0126955	0.000522019	0.00787431	-1.73429	12.3429	PDGFRA;TLN1;VCL
regulation of cell-substrate adhesion (GO:0010810)	1934-03-01	0.000811217	0.0126955	0.000522019	0.00787431	-1.68709	12.007	AGR2;RSU1;LIMS1
positive regulation of locomotion (GO:0040017)	1934-03-01	0.000811217	0.0126955	0.000522019	0.00787431	-1.48822	10.5917	TGFB1;AKT2;TWIST1
positive regulation of biomineral tissue development (GO:0070169)	1934-03-01	0.000811217	0.0126955	0.000522019	0.00787431	-1.45493	10.3547	BMP4;TGFB1;BMP6
epithelial tube morphogenesis (GO:0060562)	1935-03-01	0.000883799	0.0133315	0.000565042	0.008039	-1.73012	12.165	BMP4;TBX20;MET
negative regulation of endothelial cell migration (GO:0010596)	1935-03-01	0.000883799	0.0133315	0.000565042	0.008039	-1.69779	11.9376	DLL4;TGFB1;HMGB1
positive regulation of DNA binding (GO:0043388)	1935-03-01	0.000883799	0.0133315	0.000565042	0.008039	-1.5399	10.8275	TGFB1;TWIST1;HMGB1
positive regulation of NIK/NF-kappaB signaling (GO:1901224)	1936-03-01	0.000960376	0.0141458	0.000610269	0.00835669	-1.864	12.9514	APP;EGFR;LIMS1
positive regulation of RNA metabolic process (GO:0051254)	1936-03-01	0.000960376	0.0141458	0.000610269	0.00835669	-1.60606	11.1592	BMP4;TGFB1;EGFR
ERBB signaling pathway (GO:0038127)	1981-04-01	0.000972066	0.0141515	0.000474189	0.00761134	-1.42825	9.9065	VIL1;TGFB1;ERBB2;EGFR
regulation of amyloid fibril formation (GO:1905906)	2019-02-09	0.00101467	0.0146019	0.000965802	0.0116268	-1.75092	12.0694	APP;CLU
protein phosphorylation (GO:0006468)	9/471	0.00102956	0.0146479	0.000189217	0.00408448	-1.03473	7.11755	BMP4;PDGFRA;APP;TGFB1;AKT2;ERBB2;BIRC5;DCLK1;EGFR
positive regulation of DNA metabolic process (GO:0051054)	1983-04-01	0.00106484	0.0149795	0.000517976	0.00787431	-1.36022	9.31061	PDGFRA;MYC;HMGB1;EGFR
positive regulation of peptidyl-serine phosphorylation (GO:0033138)	1984-04-01	0.00111348	0.0154897	0.000540916	0.008039	-2.24517	15.2678	APP;TGFB1;CD44;EGFR
positive regulation of supramolecular fiber organization (GO:1902905)	1985-04-01	0.00116366	0.0160099	0.00056457	0.008039	-1.21134	8.18403	VIL1;APP;MET;CLU
regulation of peptidyl-tyrosine phosphorylation (GO:0050730)	1986-04-01	0.0012154	0.0165401	0.00058895	0.00828501	-1.80482	12.1152	APP;TGFB1;CD44;EGFR
pericardium development (GO:0060039)	2019-02-10	0.00126386	0.0165464	0.00115577	0.0132755	-2.47482	16.5159	DLL4;TBX20
type B pancreatic cell differentiation (GO:0003309)	2019-02-10	0.00126386	0.0165464	0.00115577	0.0132755	-2.46764	16.468	BMP4;BMP6
regulation of striated muscle tissue development (GO:0016202)	2019-02-10	0.00126386	0.0165464	0.00115577	0.0132755	-2.41288	16.1026	BMP4;TGFB1
regulation of peptidyl-serine phosphorylation (GO:0033135)	1987-04-01	0.00126874	0.0165464	0.00061407	0.00835669	-1.87173	12.4839	APP;TGFB1;CD44;EGFR
positive regulation of cell migration (GO:0030335)	6/222	0.00130569	0.0168529	0.000418002	0.00707214	-1.77502	11.7879	VIL1;PDGFRA;TIAM1;TGFB1;AKT2;EGFR
regulation of MAP kinase activity (GO:0043405)	1988-04-01	0.00132369	0.0169108	0.000639941	0.00843375	-1.97657	13.0994	BMP4;TGFB1;ERBB2;EGFR
positive regulation of epithelial to mesenchymal transition (GO:0010718)	1941-03-01	0.00140605	0.0177815	0.000871044	0.0105878	-2.00636	13.1757	TIAM1;TGFB1;TWIST1
regulation of fatty acid beta-oxidation (GO:0031998)	2019-02-11	0.00153928	0.0185306	0.00136215	0.0143312	-2.50036	16.1935	AKT2;TWIST1
positive regulation of cardiac muscle cell differentiation (GO:2000727)	2019-02-11	0.00153928	0.0185306	0.00136215	0.0143312	-2.48171	16.0726	BMP4;TGFB1
positive regulation of amyloid-beta formation (GO:1902004)	2019-02-11	0.00153928	0.0185306	0.00136215	0.0143312	-2.24538	14.5421	APP;CLU
gas transport (GO:0015669)	2019-02-11	0.00153928	0.0185306	0.00136215	0.0143312	-2.01314	13.038	MYC;AQP5
cell-matrix adhesion (GO:0007160)	1991-04-01	0.00149849	0.0185306	0.000722192	0.00932148	-1.40784	9.15559	TIAM1;ITGB5;CD44;VCL
regulation of cysteine-type endopeptidase activity involved in apoptotic process (GO:0043281)	1994-04-01	0.00168878	0.0199468	0.000811663	0.0100614	-1.2661	8.08247	FABP1;MYC;HMGB1;CD44
regulation of cell migration (GO:0030334)	7/317	0.00167377	0.0199468	0.000447731	0.00727999	-1.17582	7.51665	VIL1;PDGFRA;TIAM1;TGFB1;AKT2;EGFR;VCL
cardiac ventricle morphogenesis (GO:0003208)	1944-03-01	0.0017265	0.0200146	0.00105677	0.0124818	-1.55921	9.91917	DLL4;TGFB1;TBX20
positive regulation of protein localization to plasma membrane (GO:1903078)	1944-03-01	0.0017265	0.0200146	0.00105677	0.0124818	-1.47007	9.35211	AGR2;EGFR;EPHA2
positive regulation of fatty acid oxidation (GO:0046321)	2019-02-12	0.00184063	0.0202147	0.00158481	0.0152629	-3.05457	19.2366	AKT2;TWIST1
morphogenesis of an epithelial sheet (GO:0002011)	2019-02-12	0.00184063	0.0202147	0.00158481	0.0152629	-2.85898	18.0048	DLL4;TBX20
negative regulation of intrinsic apoptotic signaling pathway in response to DNA damage by p53 class mediator (GO:1902166)	2019-02-12	0.00184063	0.0202147	0.00158481	0.0152629	-2.4291	15.2976	MUC1;CD44
regulation of integrin-mediated signaling pathway (GO:2001044)	2019-02-12	0.00184063	0.0202147	0.00158481	0.0152629	-2.21361	13.9405	LOXL3;TIMP1
regulation of lamellipodium morphogenesis (GO:2000392)	2019-02-12	0.00184063	0.0202147	0.00158481	0.0152629	-2.16835	13.6555	VIL1;CD44
epithelial cell-cell adhesion (GO:0090136)	2019-02-12	0.00184063	0.0202147	0.00158481	0.0152629	-1.62766	10.2504	ITGB5;VCL
negative regulation of gene expression (GO:0010629)	10/619	0.00191337	0.0208307	0.000307828	0.00558551	-1.14628	7.17446	DLL4;BMP4;APP;TGFB1;TBX20;LOXL3;BIRC5;TWIST1;BMI1;LIMS1
positive regulation of amyloid precursor protein catabolic process (GO:1902993)	2019-02-13	0.00216764	0.0212022	0.00182359	0.0163081	-2.68506	16.4705	APP;CLU
positive regulation of DNA-dependent DNA replication (GO:2000105)	2019-02-13	0.00216764	0.0212022	0.00182359	0.0163081	-2.59216	15.9006	BMP4;BMP6
pulmonary valve morphogenesis (GO:0003184)	2019-02-13	0.00216764	0.0212022	0.00182359	0.0163081	-2.31349	14.1912	BMP4;TBX20
epithelial structure maintenance (GO:0010669)	2019-02-13	0.00216764	0.0212022	0.00182359	0.0163081	-2.30075	14.1131	MUC2;MUC13
negative regulation of myoblast differentiation (GO:0045662)	2019-02-13	0.00216764	0.0212022	0.00182359	0.0163081	-2.26771	13.9104	BMP4;TGFB1
regulation of intrinsic apoptotic signaling pathway in response to DNA damage by p53 class mediator (GO:1902165)	2019-02-13	0.00216764	0.0212022	0.00182359	0.0163081	-2.14279	13.1441	MUC1;CD44
regulation of DNA-dependent DNA replication (GO:0090329)	2019-02-13	0.00216764	0.0212022	0.00182359	0.0163081	-1.82119	11.1714	BMP4;BMP6
positive regulation of transcription from RNA polymerase II promoter (GO:0045944)	12/849	0.00210301	0.0212022	0.000245591	0.00484509	-1.70142	10.4882	BMP4;APP;MUC1;ZEB2;TGFB1;EPCAM;MYC;TWIST1;HMGB1;MET;EGFR;BMP6
negative regulation of DNA damage response, signal transduction by p53 class mediator (GO:0043518)	2019-02-13	0.00216764	0.0212022	0.00182359	0.0163081	-1.66657	10.2229	TWIST1;CD44
regulation of fibroblast proliferation (GO:0048145)	1947-03-01	0.00208917	0.0212022	0.00126579	0.0140245	-1.50758	9.30328	PDGFRA;MYC;BMI1
cartilage development (GO:0051216)	1947-03-01	0.00208917	0.0212022	0.00126579	0.0140245	-1.39889	8.63255	BMP4;TGFB1;CD44
positive regulation of protein localization to cell periphery (GO:1904377)	1947-03-01	0.00208917	0.0212022	0.00126579	0.0140245	-1.39241	8.59254	AGR2;EGFR;EPHA2
regulation of cellular component movement (GO:0051270)	1947-03-01	0.00208917	0.0212022	0.00126579	0.0140245	-1.36707	8.4362	ERBB2;CD9;EGFR
positive regulation of pathway-restricted SMAD protein phosphorylation (GO:0010862)	1948-03-01	0.00221976	0.0215437	0.00134082	0.0143312	-1.72718	10.5537	BMP4;TGFB1;BMP6
maintenance of gastrointestinal epithelium (GO:0030277)	2019-02-14	0.00252002	0.0242697	0.00207838	0.0183249	-2.19728	13.1474	MUC2;MUC13
regulation of blood vessel endothelial cell migration (GO:0043535)	1951-03-01	0.00264155	0.0250547	0.00158254	0.0152629	-1.52215	9.03605	TGFB1;HMGB1;EPHA2
wound healing (GO:0042060)	1951-03-01	0.00264155	0.0250547	0.00158254	0.0152629	-1.50106	8.9109	PDGFRA;ERBB2;TFF3
negative regulation of intrinsic apoptotic signaling pathway by p53 class mediator (GO:1902254)	2019-02-15	0.00289749	0.027072	0.00234902	0.0200588	-2.23113	13.0386	MUC1;CD44
regulation of nucleocytoplasmic transport (GO:0046822)	2019-02-15	0.00289749	0.027072	0.00234902	0.0200588	-2.16396	12.646	BMP4;TGFB1
positive regulation of ossification (GO:0045778)	1953-03-01	0.00294838	0.0273435	0.00175789	0.0163081	-1.39842	8.1479	BMP4;TGFB1;BMP6
negative regulation of muscle cell differentiation (GO:0051148)	2019-02-16	0.00329977	0.0284918	0.00263539	0.0207516	-2.57063	14.6883	BMP4;TGFB1
negative regulation of signal transduction by p53 class mediator (GO:1901797)	2019-02-16	0.00329977	0.0284918	0.00263539	0.0207516	-2.38044	13.6016	TWIST1;CD44
regulation of mitotic sister chromatid separation (GO:0010965)	2019-02-16	0.00329977	0.0284918	0.00263539	0.0207516	-2.35256	13.4423	PTTG1;UBE2C
positive regulation of protein import (GO:1904591)	2019-02-16	0.00329977	0.0284918	0.00263539	0.0207516	-2.26939	12.967	TGFB1;ECT2
digestive tract morphogenesis (GO:0048546)	2019-02-16	0.00329977	0.0284918	0.00263539	0.0207516	-2.16067	12.3459	PDGFRA;AGR2
negative regulation of platelet activation (GO:0010544)	2019-02-16	0.00329977	0.0284918	0.00263539	0.0207516	-2.08454	11.9108	PDGFRA;CD9
embryonic cranial skeleton morphogenesis (GO:0048701)	2019-02-16	0.00329977	0.0284918	0.00263539	0.0207516	-2.05654	11.7509	PDGFRA;TWIST1
positive regulation of collagen metabolic process (GO:0010714)	2019-02-16	0.00329977	0.0284918	0.00263539	0.0207516	-2.04053	11.6594	BMP4;TGFB1
positive regulation of collagen biosynthetic process (GO:0032967)	2019-02-16	0.00329977	0.0284918	0.00263539	0.0207516	-1.72857	9.87687	BMP4;TGFB1
regulation of protein binding (GO:0043393)	4/112	0.00319416	0.0284918	0.00151937	0.0152629	-1.39145	7.9959	BMP4;APP;TIAM1;DVL1
negative regulation of transcription from RNA polymerase II promoter (GO:0000122)	9/566	0.00357435	0.0306512	0.000708812	0.00924409	-0.971881	5.47555	DLL4;BMP4;ZEB2;MYC;TBX20;TWIST1;HMGB1;BMI1;BMP6
hyaluronan catabolic process (GO:0030214)	2019-02-17	0.00372661	0.0315251	0.00293734	0.0225617	-2.41336	13.4961	TGFB1;CD44
neural tube development (GO:0021915)	2019-02-17	0.00372661	0.0315251	0.00293734	0.0225617	-2.23429	12.4947	TGFB1;DVL1
epidermal growth factor receptor signaling pathway (GO:0007173)	1958-03-01	0.00380855	0.032002	0.00224799	0.0195451	-1.97032	10.9757	VIL1;TGFB1;EGFR
regulation of epidermal growth factor receptor signaling pathway (GO:0042058)	1959-03-01	0.00399698	0.0333614	0.00235515	0.0200588	-1.48626	8.20745	APP;AGR2;EGFR
cardiac atrium morphogenesis (GO:0003209)	2019-02-18	0.00417771	0.0334211	0.00325475	0.0239703	-2.33593	12.7962	DLL4;TBX20
positive regulation of interleukin-6 secretion (GO:2000778)	2019-02-18	0.00417771	0.0334211	0.00325475	0.0239703	-2.1082	11.5487	TWIST1;HMGB1
regulation of collagen biosynthetic process (GO:0032965)	2019-02-18	0.00417771	0.0334211	0.00325475	0.0239703	-1.84346	10.0985	BMP4;TGFB1
cell junction assembly (GO:0034329)	1960-03-01	0.00419099	0.0334211	0.00246543	0.0207162	-1.28593	7.04024	TLN1;VCL;LIMS1
regulation of pathway-restricted SMAD protein phosphorylation (GO:0060393)	1960-03-01	0.00419099	0.0334211	0.00246543	0.0207162	-1.17366	6.42559	BMP4;TGFB1;BMP6
positive regulation of cell differentiation (GO:0045597)	5/195	0.00414912	0.0334211	0.00162732	0.0155527	-1.113	6.10463	BMP4;TIAM1;TGFB1;TWIST1;BMP6
MAPK cascade (GO:0000165)	6/279	0.00407888	0.0334211	0.00133855	0.0143312	-1.00555	5.53245	PDGFRA;TGFB1;MYC;ERBB2;MET;EGFR
positive regulation of protein binding (GO:0032092)	1961-03-01	0.00439063	0.0347916	0.00257885	0.0207516	-1.37218	7.44857	BMP4;APP;TIAM1
negative regulation of signal transduction (GO:0009968)	6/284	0.00444516	0.0350021	0.00146279	0.0151357	-1.16906	6.33157	DLL4;PDGFRA;ERBB2;MET;EGFR;EPHA2
positive regulation of lipid catabolic process (GO:0050996)	2019-02-19	0.00465281	0.0357382	0.00358748	0.0259262	-2.23166	11.9847	AKT2;TWIST1
positive regulation of cellular amide metabolic process (GO:0034250)	1962-03-01	0.00459596	0.0357382	0.00269546	0.0209609	-1.91054	10.2836	APP;ERBB2;CLU
regulation of amyloid-beta formation (GO:1902003)	2019-02-19	0.00465281	0.0357382	0.00358748	0.0259262	-1.73294	9.30638	APP;CLU
regulation of DNA replication (GO:0006275)	1962-03-01	0.00459596	0.0357382	0.00269546	0.0209609	-1.21223	6.52493	PDGFRA;TGFB1;EGFR
positive regulation of multicellular organismal process (GO:0051240)	5/203	0.00491449	0.037518	0.00193276	0.0171618	-1.50815	8.01669	VIL1;BMP4;TIAM1;TGFB1;TWIST1
endocardial cushion development (GO:0003197)	2019-02-20	0.00515165	0.0388546	0.0039354	0.0273729	-2.00952	10.587	BMP4;TBX20
positive regulation of transcription regulatory region DNA binding (GO:2000679)	2019-02-20	0.00515165	0.0388546	0.0039354	0.0273729	-1.75506	9.24643	TGFB1;TWIST1
cellular response to decreased oxygen levels (GO:0036294)	1965-03-01	0.00524648	0.0393329	0.00306465	0.0232542	-1.29456	6.7967	FABP1;MYC;TWIST1
O-glycan processing (GO:0016266)	1966-03-01	0.00547498	0.0408016	0.00319427	0.0239474	-1.52954	7.96518	MUC1;MUC2;MUC13
ureteric bud morphogenesis (GO:0060675)	2019-02-21	0.00567395	0.041787	0.00429837	0.0294075	-2.11135	10.9196	BMP4;MYC
branching involved in ureteric bud morphogenesis (GO:0001658)	2019-02-21	0.00567395	0.041787	0.00429837	0.0294075	-2.04026	10.552	BMP4;MYC
regulation of transcription from RNA polymerase II promoter (GO:0006357)	16/1479	0.00578918	0.0423863	0.000415508	0.00707214	-1.17162	6.03588	APP;TGFB1;TWIST1;HMGB1;BMI1;EGFR;BMP6;DLL4;BMP4;MUC1;ZEB2;EPCAM;MYC;TBX20;ERBB2;MET
hyaluronan metabolic process (GO:0030212)	2019-02-22	0.00621947	0.0439931	0.00467627	0.031142	-1.96204	9.96732	TGFB1;CD44
positive regulation of cellular component movement (GO:0051272)	2019-02-22	0.00621947	0.0439931	0.00467627	0.031142	-1.76	8.94092	AKT2;TWIST1
positive regulation of leukocyte cell-cell adhesion (GO:1903039)	2019-02-22	0.00621947	0.0439931	0.00467627	0.031142	-1.7445	8.86219	CD47;CD44
embryonic skeletal system morphogenesis (GO:0048704)	2019-02-22	0.00621947	0.0439931	0.00467627	0.031142	-1.56188	7.93446	PDGFRA;TWIST1
regulation of epithelial to mesenchymal transition (GO:0010717)	1969-03-01	0.00619603	0.0439931	0.00360317	0.0259262	-1.22977	6.25195	TIAM1;TGFB1;TWIST1
negative regulation of cysteine-type endopeptidase activity involved in apoptotic process (GO:0043154)	1969-03-01	0.00619603	0.0439931	0.00360317	0.0259262	-1.14349	5.81333	FABP1;BIRC5;CD44
regulation of osteoblast differentiation (GO:0045667)	1970-03-01	0.00644837	0.0451025	0.00374624	0.0266494	-1.34156	6.76672	BMP4;TWIST1;BMP6
regulation of endothelial cell migration (GO:0010594)	1970-03-01	0.00644837	0.0451025	0.00374624	0.0266494	-1.24615	6.2855	DLL4;BMP4;EPHA2
outflow tract septum morphogenesis (GO:0003148)	2019-02-23	0.00678792	0.0459377	0.00506897	0.0328826	-2.07562	10.3628	BMP4;TBX20
regulation of ERBB signaling pathway (GO:1901184)	2019-02-23	0.00678792	0.0459377	0.00506897	0.0328826	-1.92417	9.60661	ERBB2;EGFR
hematopoietic progenitor cell differentiation (GO:0002244)	2019-02-23	0.00678792	0.0459377	0.00506897	0.0328826	-1.90251	9.49848	BMP4;TGFB1
positive regulation of protein targeting to membrane (GO:0090314)	2019-02-23	0.00678792	0.0459377	0.00506897	0.0328826	-1.70034	8.48913	AKT2;ERBB2
negative regulation of developmental process (GO:0051093)	1971-03-01	0.00670675	0.0459377	0.00389274	0.0273729	-1.22776	6.1445	BMP4;TGFB1;TIMP1
muscle contraction (GO:0006936)	4/138	0.00668663	0.0459377	0.00317207	0.0239243	-1.0526	5.27105	CHRNB1;ITGB5;TLN1;VCL
positive regulation of growth (GO:0045927)	1972-03-01	0.00697123	0.0469246	0.00404269	0.0279638	-1.25551	6.23481	ERBB2;AGR2;EGFR
positive regulation of transcription, DNA-templated (GO:0045893)	13/1121	0.0073738	0.049369	0.000859873	0.0105545	-1.41432	6.94404	APP;TGFB1;TWIST1;HMGB1;EGFR;BMP6;BMP4;ZEB2;EPCAM;MYC;DVL1;ERBB2;MET
membrane protein intracellular domain proteolysis (GO:0031293)	2019-02-25	0.00799264	0.0526673	0.00589823	0.0367343	-2.14707	10.3687	DLL4;TGFB1
transmembrane receptor protein serine/threonine kinase signaling pathway (GO:0007178)	4/145	0.00793721	0.0526673	0.00376859	0.0266569	-1.83862	8.89194	BMP4;TGFB1;ITGB5;BMP6
regulation of chemotaxis (GO:0050920)	2019-02-25	0.00799264	0.0526673	0.00589823	0.0367343	-1.63775	7.90906	PDGFRA;TGFB1
hemopoiesis (GO:0030097)	1977-03-01	0.0083861	0.0549707	0.0048451	0.0320956	-1.30638	6.24603	BMP4;TGFB1;BMI1
regulation of DNA damage response, signal transduction by p53 class mediator (GO:0043516)	2019-02-26	0.00862838	0.055116	0.00633454	0.0381291	-1.92705	9.15867	TWIST1;CD44
positive regulation of phosphatidylinositol 3-kinase activity (GO:0043552)	2019-02-26	0.00862838	0.055116	0.00633454	0.0381291	-1.84561	8.77164	PDGFRA;TGFB1
positive regulation of peptidyl-threonine phosphorylation (GO:0010800)	2019-02-26	0.00862838	0.055116	0.00633454	0.0381291	-1.76435	8.38541	APP;TGFB1
respiratory tube development (GO:0030323)	2019-02-26	0.00862838	0.055116	0.00633454	0.0381291	-1.73818	8.26105	BMP4;LOXL3
negative regulation of cellular process (GO:0048523)	8/535	0.00848456	0.055116	0.00209841	0.0183721	-1.19601	5.70436	DLL4;BMP4;APP;TGFB1;MYC;AGR2;CD9;CLU
extracellular matrix disassembly (GO:0022617)	1979-03-01	0.00899579	0.0571712	0.00519106	0.0335011	-1.16239	5.47604	MMP13;TIMP1;CD44
regulation of transcription regulatory region DNA binding (GO:2000677)	2019-02-27	0.00928605	0.0587178	0.00678513	0.0404523	-1.69021	7.90889	TGFB1;TWIST1
positive regulation of intracellular protein transport (GO:0090316)	4/153	0.00954415	0.0600466	0.00453876	0.0308833	-1.54658	7.19441	TGFB1;AKT2;ERBB2;ECT2
regulation of phosphatidylinositol 3-kinase signaling (GO:0014066)	1981-03-01	0.00963082	0.0602889	0.00555156	0.0356439	-1.16853	5.42524	PDGFRA;TWIST1;EGFR
positive regulation of substrate adhesion-dependent cell spreading (GO:1900026)	2019-02-28	0.00996538	0.0605663	0.00724988	0.0420225	-2.30649	10.6298	OLFM4;LIMS1
regulation of protein targeting to membrane (GO:0090313)	2019-02-28	0.00996538	0.0605663	0.00724988	0.0420225	-2.26248	10.4269	AKT2;ERBB2
regulation of protein localization to nucleus (GO:1900180)	2019-02-28	0.00996538	0.0605663	0.00724988	0.0420225	-1.7155	7.9061	BMP4;TGFB1
positive regulation of lipid kinase activity (GO:0090218)	2019-02-28	0.00996538	0.0605663	0.00724988	0.0420225	-1.49456	6.88789	PDGFRA;TGFB1
BMP signaling pathway (GO:0030509)	1982-03-01	0.0099579	0.0605663	0.00573732	0.0364626	-1.41561	6.52508	BMP4;TGFB1;BMP6
negative regulation of cell death (GO:0060548)	1982-03-01	0.0099579	0.0605663	0.00573732	0.0364626	-1.3079	6.02864	BMP4;AGR2;CLU
carboxylic acid catabolic process (GO:0046395)	2029-02-01	0.0106661	0.0612569	0.00772866	0.0428154	-2.12224	9.63641	TGFB1;CD44
regulation of vasculature development (GO:1901342)	2029-02-01	0.0106661	0.0612569	0.00772866	0.0428154	-1.92574	8.74416	ERBB2;EPHA2
cellular response to hydrogen peroxide (GO:0070301)	2029-02-01	0.0106661	0.0612569	0.00772866	0.0428154	-1.91479	8.69446	FABP1;ECT2
regulation of transmembrane receptor protein serine/threonine kinase signaling pathway (GO:0090092)	2029-02-01	0.0106661	0.0612569	0.00772866	0.0428154	-1.7691	8.03292	BMP4;TGFB1
positive regulation of phosphate metabolic process (GO:0045937)	2029-02-01	0.0106661	0.0612569	0.00772866	0.0428154	-1.7589	7.98662	APP;EGFR
regulation of cell morphogenesis (GO:0022604)	2029-02-01	0.0106661	0.0612569	0.00772866	0.0428154	-1.67078	7.58646	VIL1;CD44
chondrocyte differentiation (GO:0002062)	2029-02-01	0.0106661	0.0612569	0.00772866	0.0428154	-1.58057	7.17687	BMP4;TGFB1
positive regulation of phospholipid metabolic process (GO:1903727)	2029-02-01	0.0106661	0.0612569	0.00772866	0.0428154	-1.56091	7.08758	PDGFRA;TGFB1
regulation of gene expression (GO:0010468)	12/1038	0.010206	0.0612569	0.00144043	0.0150285	-1.53349	7.03071	DLL4;BMP4;APP;TGFB1;MYC;AGR2;TWIST1;HMGB1;PKP3;BMI1;CLU;LIMS1
regulation of anatomical structure morphogenesis (GO:0022603)	1983-03-01	0.0102914	0.0612569	0.00592677	0.0367343	-1.33337	6.10211	TGFB1;ERBB2;EPHA2
positive regulation of transmembrane receptor protein serine/threonine kinase signaling pathway (GO:0090100)	1983-03-01	0.0102914	0.0612569	0.00592677	0.0367343	-1.06486	4.87328	BMP4;TGFB1;BMP6
negative regulation of nucleic acid-templated transcription (GO:1903507)	7/445	0.0104864	0.0612569	0.00306408	0.0232542	-1.04529	4.76407	BMP4;TGFB1;TBX20;LOXL3;BIRC5;TWIST1;LIMS1
activation of GTPase activity (GO:0090630)	1985-03-01	0.0109777	0.0627583	0.00631685	0.0381291	-1.27993	5.77491	TIAM1;ECT2;EPHA2
regulation of myoblast differentiation (GO:0045661)	1930-02-01	0.0113881	0.0639366	0.00822135	0.0447527	-1.87869	8.40751	BMP4;TGFB1
lung development (GO:0030324)	1930-02-01	0.0113881	0.0639366	0.00822135	0.0447527	-1.84165	8.24173	BMP4;LOXL3
respiratory system development (GO:0060541)	1930-02-01	0.0113881	0.0639366	0.00822135	0.0447527	-1.78553	7.99058	BMP4;LOXL3
negative regulation of Notch signaling pathway (GO:0045746)	1930-02-01	0.0113881	0.0639366	0.00822135	0.0447527	-1.74025	7.78797	DLL4;EGFR
regulation of developmental growth (GO:0048638)	1931-02-01	0.0121309	0.0666137	0.00872782	0.0464989	-1.77638	7.8374	APP;AGR2
regulation of cell adhesion mediated by integrin (GO:0033628)	1931-02-01	0.0121309	0.0666137	0.00872782	0.0464989	-1.67977	7.41115	MUC1;EPHA2
positive regulation of phospholipase C activity (GO:0010863)	1931-02-01	0.0121309	0.0666137	0.00872782	0.0464989	-1.50387	6.63506	PDGFRA;EGFR
response to estradiol (GO:0032355)	1931-02-01	0.0121309	0.0666137	0.00872782	0.0464989	-1.42267	6.27681	TGFB1;EGFR
cellular response to BMP stimulus (GO:0071773)	1988-03-01	0.0120558	0.0666137	0.00693017	0.0409272	-1.4195	6.27167	BMP4;TGFB1;BMP6
negative regulation of cell-cell adhesion (GO:0022408)	1932-02-01	0.0128945	0.069887	0.00924795	0.0478448	-1.66629	7.24997	TGFB1;EPCAM
skeletal system morphogenesis (GO:0048705)	1932-02-01	0.0128945	0.069887	0.00924795	0.0478448	-1.50714	6.55751	PDGFRA;MMP13
positive regulation of ubiquitin-protein transferase activity (GO:0051443)	1932-02-01	0.0128945	0.069887	0.00924795	0.0478448	-1.43913	6.26158	UBE2C;BMI1
regulation of JNK cascade (GO:0046328)	1991-03-01	0.0131926	0.0711947	0.00757775	0.0428154	-1.42142	6.15206	APP;HMGB1;EGFR
positive regulation of tumor necrosis factor superfamily cytokine production (GO:1903557)	1933-02-01	0.0136785	0.0731857	0.00978162	0.0499861	-1.58002	6.78135	TWIST1;CLU
regulation of cell-cell adhesion (GO:0022407)	1933-02-01	0.0136785	0.0731857	0.00978162	0.0499861	-1.54641	6.63708	TGFB1;CD47
regulation of intracellular protein transport (GO:0033157)	1934-02-01	0.0144827	0.0749269	0.0103287	0.0509116	-1.92223	8.14028	BMP4;TGFB1
neural tube closure (GO:0001843)	1934-02-01	0.0144827	0.0749269	0.0103287	0.0509116	-1.68228	7.1241	TGFB1;DVL1
positive regulation of nucleocytoplasmic transport (GO:0046824)	1934-02-01	0.0144827	0.0749269	0.0103287	0.0509116	-1.47283	6.23716	TGFB1;ECT2
embryonic organ morphogenesis (GO:0048562)	1934-02-01	0.0144827	0.0749269	0.0103287	0.0509116	-1.42868	6.05019	PDGFRA;TBX20
positive regulation of hydrolase activity (GO:0051345)	4/173	0.0144474	0.0749269	0.00691307	0.0409272	-1.42617	6.04301	ERBB2;RSU1;ECT2;LIMS1
regulation of phosphatidylinositol 3-kinase activity (GO:0043551)	1934-02-01	0.0144827	0.0749269	0.0103287	0.0509116	-1.41249	5.98163	PDGFRA;TGFB1
cellular transition metal ion homeostasis (GO:0046916)	1994-03-01	0.0143888	0.0749269	0.00826003	0.0447687	-1.38271	5.8645	APP;MYC;BMP6
positive regulation of cell-cell adhesion (GO:0022409)	1934-02-01	0.0144827	0.0749269	0.0103287	0.0509116	-1.29269	5.4743	CD47;CD44
bone development (GO:0060348)	1935-02-01	0.0153069	0.0785417	0.0108891	0.0530473	-1.64399	6.87097	MMP13;PLS3
ventricular cardiac muscle tissue morphogenesis (GO:0055010)	1935-02-01	0.0153069	0.0785417	0.0108891	0.0530473	-1.404	5.86796	DLL4;TGFB1
protein localization to nucleus (GO:0034504)	1997-03-01	0.0156445	0.0786624	0.00897743	0.0470282	-1.4166	5.88969	BMP4;RANBP3;DVL1
positive regulation of protein metabolic process (GO:0051247)	1997-03-01	0.0156445	0.0786624	0.00897743	0.0470282	-1.22556	5.09544	APP;TGFB1;CLU
regulation of cell death (GO:0010941)	1997-03-01	0.0156445	0.0786624	0.00897743	0.0470282	-1.20978	5.0298	BMP4;AGR2;CLU
epithelial cell differentiation (GO:0030855)	1997-03-01	0.0156445	0.0786624	0.00897743	0.0470282	-1.16981	4.86364	VIL1;BMP4;AKT2
regulation of programmed cell death (GO:0043067)	5/269	0.0153999	0.0786624	0.00626038	0.0381291	-1.03142	4.30451	BMP4;TGFB1;BIRC5;CLU;BMP6
positive regulation of MAP kinase activity (GO:0043406)	4/178	0.0158815	0.0795345	0.00761405	0.0428154	-1.2239	5.07013	BMP4;TGFB1;ERBB2;EGFR
apical junction assembly (GO:0043297)	1936-02-01	0.0161508	0.0796093	0.0114627	0.0549856	-1.69304	6.98513	ECT2;VCL
positive regulation of osteoblast differentiation (GO:0045669)	1936-02-01	0.0161508	0.0796093	0.0114627	0.0549856	-1.68526	6.95303	BMP4;BMP6
protein kinase B signaling (GO:0043491)	1936-02-01	0.0161508	0.0796093	0.0114627	0.0549856	-1.67945	6.92904	TGFB1;EPHA2
positive regulation of peptide secretion (GO:0002793)	1936-02-01	0.0161508	0.0796093	0.0114627	0.0549856	-1.37145	5.65833	TGFB1;BMP6
actin polymerization or depolymerization (GO:0008154)	1937-02-01	0.0170142	0.0828862	0.0120493	0.0571427	-1.69374	6.89979	VIL1;CAP2
endoderm formation (GO:0001706)	1937-02-01	0.0170142	0.0828862	0.0120493	0.0571427	-1.57048	6.39769	ITGB5;TBX20
cardiac muscle tissue morphogenesis (GO:0055008)	1937-02-01	0.0170142	0.0828862	0.0120493	0.0571427	-1.39962	5.70165	TGFB1;TBX20
cellular response to transforming growth factor beta stimulus (GO:0071560)	3/101	0.0174122	0.0841701	0.00998923	0.0504295	-1.62151	6.56804	TGFB1;ITGB5;LIMS1
cellular response to metal ion (GO:0071248)	3/101	0.0174122	0.0841701	0.00998923	0.0504295	-1.11907	4.53288	ECT2;EGFR;BMP6
epithelial to mesenchymal transition (GO:0001837)	1938-02-01	0.0178969	0.0858501	0.0126488	0.0590908	-1.5237	6.13003	TGFB1;LOXL3
regulation of peptidyl-threonine phosphorylation (GO:0010799)	1938-02-01	0.0178969	0.0858501	0.0126488	0.0590908	-1.47591	5.93779	APP;TGFB1
positive regulation of DNA repair (GO:0045739)	1939-02-01	0.0187986	0.0894899	0.0132612	0.0614927	-1.73825	6.90775	HMGB1;EGFR
regulation of ossification (GO:0030278)	1939-02-01	0.0187986	0.0894899	0.0132612	0.0614927	-1.23794	4.91954	BMP4;TWIST1
regulation of GTPase activity (GO:0043087)	4/189	0.0193437	0.0917358	0.00931778	0.0480077	-1.04205	4.11128	ERBB2;RSU1;ECT2;LIMS1
ERBB2 signaling pathway (GO:0038128)	1940-02-01	0.0197191	0.0928134	0.0138863	0.0636836	-1.42146	5.58089	ERBB2;EGFR
negative regulation of protein catabolic process (GO:0042177)	1940-02-01	0.0197191	0.0928134	0.0138863	0.0636836	-1.31452	5.16104	TIMP1;EGFR
positive regulation of mitotic nuclear division (GO:0045840)	1941-02-01	0.0206583	0.0968695	0.0145239	0.0656461	-1.48547	5.7631	RANBP3;UBE2C
regulation of stress-activated MAPK cascade (GO:0032872)	1942-02-01	0.0216158	0.0991317	0.0151741	0.0676083	-1.61328	6.18583	MYC;EGFR
regulation of substrate adhesion-dependent cell spreading (GO:1900024)	1942-02-01	0.0216158	0.0991317	0.0151741	0.0676083	-1.54988	5.94276	OLFM4;LIMS1
odontogenesis (GO:0042476)	1942-02-01	0.0216158	0.0991317	0.0151741	0.0676083	-1.49165	5.71948	BMP4;AQP5
mesenchymal cell differentiation (GO:0048762)	1942-02-01	0.0216158	0.0991317	0.0151741	0.0676083	-1.40593	5.39081	TGFB1;LOXL3
cytokine-mediated signaling pathway (GO:0019221)	8/634	0.0215592	0.0991317	0.00580362	0.0366976	-1.09925	4.21777	MUC1;TGFB1;MYC;BIRC5;TWIST1;TIMP1;CD44;LIMS1
negative regulation of cellular macromolecule biosynthetic process (GO:2000113)	7/513	0.0212615	0.0991317	0.00655982	0.0392961	-0.865534	3.33305	BMP4;TGFB1;TBX20;LOXL3;BIRC5;TWIST1;LIMS1
regulation of Wnt signaling pathway (GO:0030111)	3/110	0.0217817	0.099528	0.0125005	0.059059	-1.55582	5.95362	APP;TIAM1;DVL1
positive regulation of protein localization to nucleus (GO:1900182)	1943-02-01	0.0225914	0.102853	0.0158366	0.0698147	-1.57433	5.96701	TGFB1;ECT2
regulation of multicellular organismal development (GO:2000026)	1944-02-01	0.023585	0.105459	0.0165113	0.0710384	-1.6477	6.17416	TIAM1;HMGB1
negative regulation of protein metabolic process (GO:0051248)	1944-02-01	0.023585	0.105459	0.0165113	0.0710384	-1.62549	6.09096	CLU;EGFR
negative regulation of ERBB signaling pathway (GO:1901185)	1944-02-01	0.023585	0.105459	0.0165113	0.0710384	-1.59811	5.98836	ERBB2;EGFR
response to hydrogen peroxide (GO:0042542)	1944-02-01	0.023585	0.105459	0.0165113	0.0710384	-1.45265	5.44328	FABP1;ECT2
positive regulation of interleukin-6 production (GO:0032755)	1944-02-01	0.023585	0.105459	0.0165113	0.0710384	-1.37247	5.14286	TWIST1;HMGB1
positive regulation of developmental process (GO:0051094)	3/114	0.0238986	0.106481	0.0137225	0.0633968	-1.19182	4.45016	VIL1;BMP4;AGR2
cellular response to oxidative stress (GO:0034599)	3/116	0.0249975	0.11059	0.0143581	0.0651318	-1.64598	6.072	PDGFRA;GPX2;EGFR
protein O-linked glycosylation (GO:0006493)	3/116	0.0249975	0.11059	0.0143581	0.0651318	-1.08322	3.99599	MUC1;MUC2;MUC13
protein polymerization (GO:0051258)	1946-02-01	0.025625	0.11257	0.0178971	0.0756997	-1.70936	6.26341	VIL1;UBE2C
positive regulation of blood vessel endothelial cell migration (GO:0043536)	1946-02-01	0.025625	0.11257	0.0178971	0.0756997	-1.48309	5.43433	TGFB1;HMGB1
positive regulation of apoptotic process (GO:0043065)	5/308	0.0258693	0.113207	0.0107825	0.05294	-1.32614	4.84663	BMP4;TIAM1;MYC;HMGB1;ECT2
positive regulation of signal transduction (GO:0009967)	4/207	0.0259507	0.113207	0.012611	0.0590908	-0.993054	3.62619	DLL4;DVL1;LOXL3;BMP6
positive regulation of protein serine/threonine kinase activity (GO:0071902)	3/119	0.0266963	0.116055	0.0153426	0.0681169	-1.52757	5.53475	TGFB1;ERBB2;EGFR
regulation of intracellular signal transduction (GO:1902531)	6/423	0.0272367	0.117757	0.00986328	0.0501985	-1.49856	5.39959	BMP4;TIAM1;TGFB1;ECT2;EGFR;BMP6
regulation of phosphorylation (GO:0042325)	3/120	0.027276	0.117757	0.0156791	0.0693648	-1.04542	3.76534	BMP4;APP;EGFR
positive regulation of tumor necrosis factor production (GO:0032760)	1948-02-01	0.0277342	0.119324	0.0193304	0.0812138	-1.51784	5.44161	TWIST1;CLU
regulation of cell differentiation (GO:0045595)	3/122	0.0284555	0.121591	0.0163645	0.0710384	-1.54131	5.48617	BMP4;TIAM1;TGFB1
stimulatory C-type lectin receptor signaling pathway (GO:0002223)	3/122	0.0284555	0.121591	0.0163645	0.0710384	-1.09761	3.90684	MUC1;MUC2;MUC13
negative regulation of mitotic cell cycle (GO:0045930)	1949-02-01	0.0288141	0.122289	0.0200647	0.0837367	-1.50356	5.33295	BMP4;TGFB1
positive regulation of chemotaxis (GO:0050921)	1949-02-01	0.0288141	0.122289	0.0200647	0.0837367	-1.24709	4.4233	TGFB1;MET
positive regulation of response to DNA damage stimulus (GO:2001022)	1950-02-01	0.0299107	0.126514	0.0208106	0.0859895	-1.91941	6.73626	MYC;EGFR
negative regulation of macromolecule metabolic process (GO:0010605)	3/125	0.030275	0.127196	0.0174239	0.0744529	-1.37306	4.80218	DLL4;APP;TGFB1
innate immune response activating cell surface receptor signaling pathway (GO:0002220)	3/125	0.030275	0.127196	0.0174239	0.0744529	-1.186	4.14796	MUC1;MUC2;MUC13
regulation of cellular protein metabolic process (GO:0032268)	1951-02-01	0.0310237	0.129042	0.0215679	0.0885025	-1.49789	5.20219	APP;TGFB1
myeloid leukocyte differentiation (GO:0002573)	1951-02-01	0.0310237	0.129042	0.0215679	0.0885025	-1.21674	4.22574	BMP4;EPHA2
negative regulation of multicellular organismal process (GO:0051241)	3/126	0.0308949	0.129042	0.0177854	0.0756997	-0.949598	3.30191	BMP4;TIMP1;EGFR
peptidyl-tyrosine modification (GO:0018212)	1952-02-01	0.032153	0.133296	0.0223365	0.0910923	-1.5257	5.24422	PDGFRA;EGFR
positive regulation of microglial cell activation (GO:1903980)	2019-01-07	0.0371986	0.133766	0.0337188	0.113484	-3.65053	12.0156	APP
regulation of T-helper 17 cell lineage commitment (GO:2000328)	2019-01-07	0.0371986	0.133766	0.0337188	0.113484	-3.22793	10.6247	LOXL3
positive regulation of vesicle fusion (GO:0031340)	2019-01-07	0.0371986	0.133766	0.0337188	0.113484	-3.16406	10.4145	AKT2
gland morphogenesis (GO:0022612)	2019-01-07	0.0371986	0.133766	0.0337188	0.113484	-3.03866	10.0017	TGFB1
negative regulation of T cell differentiation in thymus (GO:0033085)	2019-01-07	0.0371986	0.133766	0.0337188	0.113484	-2.982	9.8152	BMP4
regulation of response to wounding (GO:1903034)	2019-01-07	0.0371986	0.133766	0.0337188	0.113484	-2.93182	9.65003	VIL1
regulation of thymocyte apoptotic process (GO:0070243)	2019-01-07	0.0371986	0.133766	0.0337188	0.113484	-2.92817	9.63801	BMP4
spinal cord dorsal/ventral patterning (GO:0021513)	2019-01-07	0.0371986	0.133766	0.0337188	0.113484	-2.87515	9.46351	DLL4
positive regulation of mitochondrial membrane potential (GO:0010918)	2019-01-07	0.0371986	0.133766	0.0337188	0.113484	-2.84569	9.36655	AKT2
lens fiber cell development (GO:0070307)	2019-01-07	0.0371986	0.133766	0.0337188	0.113484	-2.81819	9.27601	EPHA2
response to UV-A (GO:0070141)	2019-01-07	0.0371986	0.133766	0.0337188	0.113484	-2.80226	9.2236	EGFR
blood vessel endothelial cell proliferation involved in sprouting angiogenesis (GO:0002043)	2019-01-07	0.0371986	0.133766	0.0337188	0.113484	-2.75279	9.06078	BMP4
negative regulation of mRNA catabolic process (GO:1902373)	2019-01-07	0.0371986	0.133766	0.0337188	0.113484	-2.74159	9.0239	PKP3
spinal cord motor neuron differentiation (GO:0021522)	2019-01-07	0.0371986	0.133766	0.0337188	0.113484	-2.70843	8.91476	TBX20
coronary vasculature development (GO:0060976)	2019-01-07	0.0371986	0.133766	0.0337188	0.113484	-2.69568	8.87279	BMP4
collecting duct development (GO:0072044)	2019-01-07	0.0371986	0.133766	0.0337188	0.113484	-2.68922	8.85153	BMP4
regulation of hyaluronan biosynthetic process (GO:1900125)	2019-01-07	0.0371986	0.133766	0.0337188	0.113484	-2.67889	8.81753	TGFB1
regulation of aldosterone biosynthetic process (GO:0032347)	2019-01-07	0.0371986	0.133766	0.0337188	0.113484	-2.67107	8.79179	BMP6
positive regulation of fibroblast migration (GO:0010763)	2019-01-07	0.0371986	0.133766	0.0337188	0.113484	-2.61717	8.61437	TGFB1
regulation of mesenchymal stem cell differentiation (GO:2000739)	2019-01-07	0.0371986	0.133766	0.0337188	0.113484	-2.60669	8.57986	PDGFRA
neuron projection maintenance (GO:1990535)	2019-01-07	0.0371986	0.133766	0.0337188	0.113484	-2.56571	8.445	APP
positive regulation of cardiac muscle tissue development (GO:0055025)	2019-01-07	0.0371986	0.133766	0.0337188	0.113484	-2.56313	8.43649	TGFB1
macrophage derived foam cell differentiation (GO:0010742)	2019-01-07	0.0371986	0.133766	0.0337188	0.113484	-2.48514	8.17979	TGFB1
muscle tissue development (GO:0060537)	2019-01-07	0.0371986	0.133766	0.0337188	0.113484	-2.47332	8.14089	BMP4
smooth muscle tissue development (GO:0048745)	2019-01-07	0.0371986	0.133766	0.0337188	0.113484	-2.42685	7.98794	BMP4
negative regulation of stress-activated protein kinase signaling cascade (GO:0070303)	2019-01-07	0.0371986	0.133766	0.0337188	0.113484	-2.36502	7.78442	MYC
lymphoid progenitor cell differentiation (GO:0002320)	2019-01-07	0.0371986	0.133766	0.0337188	0.113484	-2.34428	7.71617	BMP4
regulation of blood vessel remodeling (GO:0060312)	2019-01-07	0.0371986	0.133766	0.0337188	0.113484	-2.31126	7.60747	TGFB1
negative regulation of vasculature development (GO:1901343)	2019-01-07	0.0371986	0.133766	0.0337188	0.113484	-2.25839	7.43347	BMP4
foam cell differentiation (GO:0090077)	2019-01-07	0.0371986	0.133766	0.0337188	0.113484	-2.19808	7.23494	TGFB1
neuron remodeling (GO:0016322)	2019-01-07	0.0371986	0.133766	0.0337188	0.113484	-2.19739	7.23268	APP
mesenchymal to epithelial transition involved in metanephros morphogenesis (GO:0003337)	2019-01-07	0.0371986	0.133766	0.0337188	0.113484	-2.11678	6.96734	BMP4
cellular response to iron ion (GO:0071281)	2019-01-07	0.0371986	0.133766	0.0337188	0.113484	-2.1121	6.95196	BMP6
venous blood vessel morphogenesis (GO:0048845)	2019-01-07	0.0371986	0.133766	0.0337188	0.113484	-2.09608	6.89921	TBX20
intracellular pH elevation (GO:0051454)	2019-01-07	0.0371986	0.133766	0.0337188	0.113484	-1.96709	6.47466	SLC26A3
cellular iron ion homeostasis (GO:0006879)	1957-02-01	0.0380356	0.133766	0.0263465	0.10276	-1.97886	6.46937	MYC;BMP6
astrocyte activation (GO:0048143)	2019-01-07	0.0371986	0.133766	0.0337188	0.113484	-1.87246	6.16316	APP
positive regulation of secretion by cell (GO:1903532)	1953-02-01	0.0332983	0.133766	0.0231164	0.0936628	-1.52718	5.19584	TGFB1;BMP6
positive regulation of kidney development (GO:0090184)	2019-01-07	0.0371986	0.133766	0.0337188	0.113484	-1.57257	5.17609	BMP4
positive regulation of centrosome cycle (GO:0046607)	2019-01-07	0.0371986	0.133766	0.0337188	0.113484	-1.56076	5.13721	RANBP3
Notch signaling pathway (GO:0007219)	1956-02-01	0.0368282	0.133766	0.0255226	0.102747	-1.53385	5.06398	DLL4;MYC
negative regulation of DNA repair (GO:0045738)	2019-01-07	0.0371986	0.133766	0.0337188	0.113484	-1.53134	5.04038	TWIST1
glycosaminoglycan catabolic process (GO:0006027)	1957-02-01	0.0380356	0.133766	0.0263465	0.10276	-1.50551	4.92187	TGFB1;CD44
positive regulation of cysteine-type endopeptidase activity (GO:2001056)	1956-02-01	0.0368282	0.133766	0.0255226	0.102747	-1.39654	4.61067	MYC;HMGB1
protein import (GO:0017038)	1957-02-01	0.0380356	0.133766	0.0263465	0.10276	-1.28082	4.18729	RANBP3;CLU
positive regulation of protein transport (GO:0051222)	1957-02-01	0.0380356	0.133766	0.0263465	0.10276	-1.25478	4.10217	TGFB1;BMP6
chordate embryonic development (GO:0043009)	1957-02-01	0.0380356	0.133766	0.0263465	0.10276	-1.20544	3.94087	TGFB1;DVL1
phosphatidylinositol-mediated signaling (GO:0048015)	1957-02-01	0.0380356	0.133766	0.0263465	0.10276	-1.18215	3.86472	PDGFRA;ERBB2
regulation of DNA binding (GO:0051101)	1953-02-01	0.0332983	0.133766	0.0231164	0.0936628	-1.11265	3.7855	TGFB1;HMGB1
cellular response to hypoxia (GO:0071456)	3/133	0.0354202	0.133766	0.0204331	0.0849907	-1.11283	3.71738	FABP1;MYC;TWIST1
regulation of macromolecule metabolic process (GO:0060255)	3/130	0.033441	0.133766	0.0192732	0.0812138	-1.08212	3.677	APP;MYC;BMI1
cellular response to organic cyclic compound (GO:0071407)	3/136	0.0374588	0.133766	0.0216308	0.0885025	-1.0285	3.37813	TGFB1;SLC26A3;EGFR
negative regulation of cellular catabolic process (GO:0031330)	1957-02-01	0.0380356	0.133766	0.0263465	0.10276	-0.999755	3.26843	TIMP1;MET
cellular response to cytokine stimulus (GO:0071345)	6/457	0.0375876	0.133766	0.0139764	0.0638628	-0.843473	2.7675	MUC1;TGFB1;MYC;BIRC5;TWIST1;TIMP1
regulation of toll-like receptor 9 signaling pathway (GO:0034163)	2019-01-08	0.0423996	0.137169	0.0378542	0.117021	-3.53639	11.1772	HMGB1
cardiac atrium development (GO:0003230)	2019-01-08	0.0423996	0.137169	0.0378542	0.117021	-3.07486	9.71845	DLL4
V(D)J recombination (GO:0033151)	2019-01-08	0.0423996	0.137169	0.0378542	0.117021	-2.98153	9.42348	HMGB1
dorsal aorta morphogenesis (GO:0035912)	2019-01-08	0.0423996	0.137169	0.0378542	0.117021	-2.89457	9.14862	DLL4
adherens junction assembly (GO:0034333)	2019-01-08	0.0423996	0.137169	0.0378542	0.117021	-2.81961	8.9117	VCL
oxygen transport (GO:0015671)	2019-01-08	0.0423996	0.137169	0.0378542	0.117021	-2.77847	8.78168	MYC
pharyngeal arch artery morphogenesis (GO:0061626)	2019-01-08	0.0423996	0.137169	0.0378542	0.117021	-2.77204	8.76135	BMP4
regulation of microglial cell activation (GO:1903978)	2019-01-08	0.0423996	0.137169	0.0378542	0.117021	-2.76671	8.74452	APP
regulation of dendritic cell differentiation (GO:2001198)	2019-01-08	0.0423996	0.137169	0.0378542	0.117021	-2.7195	8.5953	HMGB1
regulation of transcription from RNA polymerase II promoter involved in heart development (GO:1901213)	2019-01-08	0.0423996	0.137169	0.0378542	0.117021	-2.56198	8.09744	BMP4
dorsal aorta development (GO:0035907)	2019-01-08	0.0423996	0.137169	0.0378542	0.117021	-2.55039	8.06081	DLL4
negative regulation of platelet-derived growth factor receptor-beta signaling pathway (GO:2000587)	2019-01-08	0.0423996	0.137169	0.0378542	0.117021	-2.47129	7.81079	PDGFRA
negative regulation of cell adhesion mediated by integrin (GO:0033629)	2019-01-08	0.0423996	0.137169	0.0378542	0.117021	-2.44658	7.7327	MUC1
negative regulation of production of miRNAs involved in gene silencing by miRNA (GO:1903799)	2019-01-08	0.0423996	0.137169	0.0378542	0.117021	-2.42751	7.67244	TGFB1
positive regulation of cyclin-dependent protein serine/threonine kinase activity involved in G1/S transition of mitotic cell cycle (GO:0031659)	2019-01-08	0.0423996	0.137169	0.0378542	0.117021	-2.41201	7.62343	EGFR
negative regulation of membrane protein ectodomain proteolysis (GO:0051045)	2019-01-08	0.0423996	0.137169	0.0378542	0.117021	-2.4089	7.61361	TIMP1
negative regulation of cardiocyte differentiation (GO:1905208)	2019-01-08	0.0423996	0.137169	0.0378542	0.117021	-2.34133	7.40003	EGFR
negative regulation of nitrogen compound metabolic process (GO:0051172)	2019-01-08	0.0423996	0.137169	0.0378542	0.117021	-2.32631	7.35256	TGFB1
microglial cell activation (GO:0001774)	2019-01-08	0.0423996	0.137169	0.0378542	0.117021	-2.29533	7.25466	CLU
positive regulation of lamellipodium morphogenesis (GO:2000394)	2019-01-08	0.0423996	0.137169	0.0378542	0.117021	-2.28069	7.20839	VIL1
leukocyte aggregation (GO:0070486)	2019-01-08	0.0423996	0.137169	0.0378542	0.117021	-2.25783	7.13613	CD44
response to misfolded protein (GO:0051788)	2019-01-08	0.0423996	0.137169	0.0378542	0.117021	-2.14632	6.78371	CLU
positive regulation of histone H4 acetylation (GO:0090240)	2019-01-08	0.0423996	0.137169	0.0378542	0.117021	-2.13581	6.75049	MUC1
regulation of monocyte chemotactic protein-1 production (GO:0071637)	2019-01-08	0.0423996	0.137169	0.0378542	0.117021	-1.98921	6.28714	TWIST1
T-helper 1 type immune response (GO:0042088)	2019-01-08	0.0423996	0.137169	0.0378542	0.117021	-1.97645	6.2468	HMGB1
positive regulation of cell death (GO:0010942)	1958-02-01	0.039258	0.137169	0.027181	0.105685	-1.54861	5.01378	BMP4;CLU
cell morphogenesis (GO:0000902)	1960-02-01	0.0417471	0.137169	0.0288819	0.110244	-1.56048	4.95628	CLU;CAP2
epithelial cell differentiation involved in kidney development (GO:0035850)	2019-01-08	0.0423996	0.137169	0.0378542	0.117021	-1.56494	4.94619	BMP4
receptor metabolic process (GO:0043112)	1959-02-01	0.0404952	0.137169	0.0280262	0.107966	-1.25462	4.02304	TGFB1;CD9
integrin-mediated signaling pathway (GO:0007229)	1959-02-01	0.0404952	0.137169	0.0280262	0.107966	-1.21695	3.90223	ITGB5;CD47
positive regulation of cell morphogenesis involved in differentiation (GO:0010770)	1959-02-01	0.0404952	0.137169	0.0280262	0.107966	-1.16095	3.72267	OLFM4;LIMS1
cell chemotaxis (GO:0060326)	1961-02-01	0.0430134	0.138439	0.0297481	0.112862	-1.20503	3.79132	PDGFRA;EPHA2
response to reactive oxygen species (GO:0000302)	1961-02-01	0.0430134	0.138439	0.0297481	0.112862	-1.06673	3.35619	PDGFRA;EGFR
positive regulation of metanephros development (GO:0072216)	2019-01-09	0.0475727	0.141475	0.0419722	0.118621	-3.06662	9.33938	MYC
positive regulation of IRE1-mediated unfolded protein response (GO:1903896)	2019-01-09	0.0475727	0.141475	0.0419722	0.118621	-2.92894	8.92007	AGR2
barbed-end actin filament capping (GO:0051016)	2019-01-09	0.0475727	0.141475	0.0419722	0.118621	-2.84722	8.6712	VIL1
positive regulation of isotype switching (GO:0045830)	2019-01-09	0.0475727	0.141475	0.0419722	0.118621	-2.79452	8.51071	TGFB1
regulation of metaphase/anaphase transition of cell cycle (GO:1902099)	2019-01-09	0.0475727	0.141475	0.0419722	0.118621	-2.73921	8.34227	UBE2C
positive regulation of extracellular matrix assembly (GO:1901203)	2019-01-09	0.0475727	0.141475	0.0419722	0.118621	-2.73471	8.32856	TGFB1
actin filament network formation (GO:0051639)	2019-01-09	0.0475727	0.141475	0.0419722	0.118621	-2.70482	8.23753	PLS3
ventricular trabecula myocardium morphogenesis (GO:0003222)	2019-01-09	0.0475727	0.141475	0.0419722	0.118621	-2.63134	8.01375	DLL4
central nervous system myelination (GO:0022010)	2019-01-09	0.0475727	0.141475	0.0419722	0.118621	-2.6111	7.95209	CLU
positive regulation of membrane potential (GO:0045838)	2019-01-09	0.0475727	0.141475	0.0419722	0.118621	-2.61041	7.95	AKT2
myelin maintenance (GO:0043217)	2019-01-09	0.0475727	0.141475	0.0419722	0.118621	-2.51822	7.66922	CLU
SMAD protein complex assembly (GO:0007183)	2019-01-09	0.0475727	0.141475	0.0419722	0.118621	-2.50069	7.61584	TGFB1
positive regulation of catenin import into nucleus (GO:0035413)	2019-01-09	0.0475727	0.141475	0.0419722	0.118621	-2.50032	7.61471	EGFR
desmosome organization (GO:0002934)	2019-01-09	0.0475727	0.141475	0.0419722	0.118621	-2.41608	7.35815	PKP3
negative regulation of platelet aggregation (GO:0090331)	2019-01-09	0.0475727	0.141475	0.0419722	0.118621	-2.38509	7.26377	CD9
regulation of PERK-mediated unfolded protein response (GO:1903897)	2019-01-09	0.0475727	0.141475	0.0419722	0.118621	-2.37627	7.23692	AGR2
negative regulation of anion transmembrane transport (GO:1903960)	2019-01-09	0.0475727	0.141475	0.0419722	0.118621	-2.31639	7.05455	AKT2
histone H2A-K119 monoubiquitination (GO:0036353)	2019-01-09	0.0475727	0.141475	0.0419722	0.118621	-2.31513	7.05073	BMI1
regulation of endodeoxyribonuclease activity (GO:0032071)	2019-01-09	0.0475727	0.141475	0.0419722	0.118621	-2.30337	7.01491	HMGB1
regulation of T cell mediated immunity (GO:0002709)	2019-01-09	0.0475727	0.141475	0.0419722	0.118621	-2.27255	6.92106	HMGB1
amyloid fibril formation (GO:1990000)	2019-01-09	0.0475727	0.141475	0.0419722	0.118621	-2.21783	6.75439	APP
regulation of apoptotic cell clearance (GO:2000425)	2019-01-09	0.0475727	0.141475	0.0419722	0.118621	-2.09425	6.37802	HMGB1
regulation of histone H4 acetylation (GO:0090239)	2019-01-09	0.0475727	0.141475	0.0419722	0.118621	-2.03664	6.20258	MUC1
negative regulation of protein homooligomerization (GO:0032463)	2019-01-09	0.0475727	0.141475	0.0419722	0.118621	-2.00825	6.11613	CLU
regulation of muscle organ development (GO:0048634)	2019-01-09	0.0475727	0.141475	0.0419722	0.118621	-1.94687	5.92919	TGFB1
mammary gland epithelial cell differentiation (GO:0060644)	2019-01-09	0.0475727	0.141475	0.0419722	0.118621	-1.71094	5.21066	AKT2
endochondral ossification (GO:0001958)	2019-01-09	0.0475727	0.141475	0.0419722	0.118621	-1.69049	5.14838	BMP4
iron ion homeostasis (GO:0055072)	1964-02-01	0.0468972	0.141475	0.0324079	0.113484	-1.27315	3.89559	MYC;BMP6
negative regulation of cell proliferation (GO:0008285)	5/364	0.0475015	0.141475	0.0205944	0.0853782	-1.24826	3.80343	DLL4;BMP4;APP;TGFB1;MYC
regulation of tumor necrosis factor production (GO:0032680)	1962-02-01	0.044294	0.141475	0.0306245	0.113484	-1.1445	3.56731	TWIST1;CLU
skeletal system development (GO:0001501)	3/147	0.0454358	0.141475	0.0263465	0.10276	-1.12137	3.46665	PLS3;CD44;BMP6
negative regulation of peptidase activity (GO:0010466)	1963-02-01	0.0455886	0.141475	0.0315111	0.113484	-1.06547	3.29028	TIMP1;SERPINB5
negative regulation of cell differentiation (GO:0045596)	3/151	0.0485292	0.143978	0.0281875	0.108254	-1.25477	3.79642	TGFB1;TWIST1;EGFR
flavonoid glucuronidation (GO:0052696)	2019-01-10	0.0527181	0.145381	0.0460728	0.120173	-3.23785	9.52833	UGT1A9
Notch signaling involved in heart development (GO:0061314)	2019-01-10	0.0527181	0.145381	0.0460728	0.120173	-2.9343	8.63504	DLL4
myelin assembly (GO:0032288)	2019-01-10	0.0527181	0.145381	0.0460728	0.120173	-2.70833	7.97006	CD9
positive regulation of vascular endothelial cell proliferation (GO:1905564)	2019-01-10	0.0527181	0.145381	0.0460728	0.120173	-2.59065	7.62376	HMGB1
positive regulation of astrocyte differentiation (GO:0048711)	2019-01-10	0.0527181	0.145381	0.0460728	0.120173	-2.55939	7.53176	APP
regulation of cell-cell adhesion mediated by cadherin (GO:2000047)	2019-01-10	0.0527181	0.145381	0.0460728	0.120173	-2.54593	7.49216	EPCAM
positive regulation of long-term synaptic potentiation (GO:1900273)	2019-01-10	0.0527181	0.145381	0.0460728	0.120173	-2.47428	7.28131	APP
positive regulation of cell activation (GO:0050867)	2019-01-10	0.0527181	0.145381	0.0460728	0.120173	-2.37266	6.98225	APP
negative regulation of amyloid-beta formation (GO:1902430)	2019-01-10	0.0527181	0.145381	0.0460728	0.120173	-2.34231	6.89295	CLU
negative regulation of phosphatidylinositol 3-kinase signaling (GO:0014067)	2019-01-10	0.0527181	0.145381	0.0460728	0.120173	-2.32266	6.83513	TWIST1
negative regulation of phagocytosis (GO:0050765)	2019-01-10	0.0527181	0.145381	0.0460728	0.120173	-2.29041	6.7402	HMGB1
positive regulation of protein homooligomerization (GO:0032464)	2019-01-10	0.0527181	0.145381	0.0460728	0.120173	-2.27725	6.70149	CLU
embryonic digestive tract morphogenesis (GO:0048557)	2019-01-10	0.0527181	0.145381	0.0460728	0.120173	-2.25503	6.6361	PDGFRA
positive regulation of epidermis development (GO:0045684)	2019-01-10	0.0527181	0.145381	0.0460728	0.120173	-2.23344	6.57257	BMP4
atrioventricular valve development (GO:0003171)	2019-01-10	0.0527181	0.145381	0.0460728	0.120173	-2.20322	6.48363	TBX20
regulation of macrophage cytokine production (GO:0010935)	2019-01-10	0.0527181	0.145381	0.0460728	0.120173	-2.16996	6.38575	TGFB1
actin crosslink formation (GO:0051764)	2019-01-10	0.0527181	0.145381	0.0460728	0.120173	-2.13146	6.27246	PLS3
mesodermal cell differentiation (GO:0048333)	2019-01-10	0.0527181	0.145381	0.0460728	0.120173	-2.11619	6.22752	BMP4
neuron projection organization (GO:0106027)	2019-01-10	0.0527181	0.145381	0.0460728	0.120173	-2.03013	5.97426	APP
negative regulation of transcription by competitive promoter binding (GO:0010944)	2019-01-10	0.0527181	0.145381	0.0460728	0.120173	-2.01821	5.93917	MUC1
negative regulation of mitotic nuclear division (GO:0045839)	2019-01-10	0.0527181	0.145381	0.0460728	0.120173	-2.01328	5.92467	BMP4
regulation of platelet-derived growth factor receptor-beta signaling pathway (GO:2000586)	2019-01-10	0.0527181	0.145381	0.0460728	0.120173	-2.01313	5.92423	PDGFRA
ionotropic glutamate receptor signaling pathway (GO:0035235)	2019-01-10	0.0527181	0.145381	0.0460728	0.120173	-1.9741	5.80936	APP
DNA topological change (GO:0006265)	2019-01-10	0.0527181	0.145381	0.0460728	0.120173	-1.94787	5.73218	HMGB1
regulation of interleukin-1 secretion (GO:0050704)	2019-01-10	0.0527181	0.145381	0.0460728	0.120173	-1.84759	5.43709	HMGB1
cytoskeletal anchoring at plasma membrane (GO:0007016)	2019-01-10	0.0527181	0.145381	0.0460728	0.120173	-1.8375	5.4074	TLN1
negative regulation of T cell apoptotic process (GO:0070233)	2019-01-10	0.0527181	0.145381	0.0460728	0.120173	-1.63511	4.8118	BMP4
neuron maturation (GO:0042551)	2019-01-10	0.0527181	0.145381	0.0460728	0.120173	-1.58093	4.65235	APP
negative regulation of apoptotic signaling pathway (GO:2001234)	1966-02-01	0.0495552	0.145381	0.0342313	0.114592	-1.46503	4.40193	BMP4;CLU
negative regulation of cell adhesion (GO:0007162)	1966-02-01	0.0495552	0.145381	0.0342313	0.114592	-1.32405	3.97834	MUC1;TGFB1
positive regulation of endothelial cell proliferation (GO:0001938)	1968-02-01	0.0522665	0.145381	0.0360939	0.117021	-1.1224	3.31266	BMP4;HMGB1
positive regulation of programmed cell death (GO:0043068)	4/258	0.0513081	0.145381	0.0256881	0.10276	-0.934118	2.77424	BMP4;TIAM1;HMGB1;ECT2
regulation of endopeptidase activity (GO:0052548)	1969-02-01	0.0536418	0.147603	0.0370398	0.117021	-1.08142	3.1636	TIMP1;SERPINB5
actin filament capping (GO:0051693)	2019-01-11	0.057836	0.14893	0.0501562	0.122983	-2.53903	7.23659	VIL1
regulation of attachment of spindle microtubules to kinetochore (GO:0051988)	2019-01-11	0.057836	0.14893	0.0501562	0.122983	-2.53723	7.23147	ECT2
cell differentiation involved in metanephros development (GO:0072202)	2019-01-11	0.057836	0.14893	0.0501562	0.122983	-2.40238	6.84714	BMP4
negative regulation of T cell differentiation (GO:0045581)	2019-01-12	0.0629265	0.14893	0.0542223	0.122983	-2.46652	6.82186	BMP4
negative regulation of homotypic cell-cell adhesion (GO:0034111)	2019-01-11	0.057836	0.14893	0.0501562	0.122983	-2.30217	6.56151	CD9
negative regulation of amyloid precursor protein catabolic process (GO:1902992)	2019-01-12	0.0629265	0.14893	0.0542223	0.122983	-2.3397	6.47112	CLU
negative regulation of gene silencing by miRNA (GO:0060965)	2019-01-11	0.057836	0.14893	0.0501562	0.122983	-2.2664	6.45958	TGFB1
smooth muscle cell differentiation (GO:0051145)	2019-01-11	0.057836	0.14893	0.0501562	0.122983	-2.2544	6.42536	BMP4
mesenchymal to epithelial transition (GO:0060231)	2019-01-11	0.057836	0.14893	0.0501562	0.122983	-2.23886	6.38106	BMP4
negative regulation of cellular senescence (GO:2000773)	2019-01-12	0.0629265	0.14893	0.0542223	0.122983	-2.29215	6.33959	TWIST1
negative regulation of reproductive process (GO:2000242)	2019-01-11	0.057836	0.14893	0.0501562	0.122983	-2.19988	6.26998	TIMP1
inhibition of cysteine-type endopeptidase activity involved in apoptotic process (GO:1990001)	2019-01-12	0.0629265	0.14893	0.0542223	0.122983	-2.23804	6.18996	BIRC5
actin filament depolymerization (GO:0030042)	2019-01-11	0.057836	0.14893	0.0501562	0.122983	-2.14596	6.11628	VIL1
negative regulation of cell activation (GO:0050866)	2019-01-11	0.057836	0.14893	0.0501562	0.122983	-2.14288	6.10751	PDGFRA
atrial septum morphogenesis (GO:0060413)	2019-01-12	0.0629265	0.14893	0.0542223	0.122983	-2.20414	6.09618	TBX20
endothelial tube morphogenesis (GO:0061154)	2019-01-11	0.057836	0.14893	0.0501562	0.122983	-2.12991	6.07054	BMP4
positive regulation of mesenchymal cell proliferation (GO:0002053)	2019-01-12	0.0629265	0.14893	0.0542223	0.122983	-2.19267	6.06445	MYC
positive regulation of actin filament depolymerization (GO:0030836)	2019-01-12	0.0629265	0.14893	0.0542223	0.122983	-2.18924	6.05498	VIL1
oxalate transport (GO:0019532)	2019-01-11	0.057836	0.14893	0.0501562	0.122983	-2.10449	5.9981	SLC26A3
epithelial cell morphogenesis (GO:0003382)	2019-01-11	0.057836	0.14893	0.0501562	0.122983	-2.08417	5.94018	MET
monocyte differentiation (GO:0030224)	2019-01-12	0.0629265	0.14893	0.0542223	0.122983	-2.11195	5.8412	BMP4
positive regulation of transcription from RNA polymerase III promoter (GO:0045945)	2019-01-11	0.057836	0.14893	0.0501562	0.122983	-2.04485	5.82812	ERBB2
contractile actin filament bundle assembly (GO:0030038)	2019-01-11	0.057836	0.14893	0.0501562	0.122983	-2.03335	5.79534	ITGB5
regulation of amyloid-beta clearance (GO:1900221)	2019-01-11	0.057836	0.14893	0.0501562	0.122983	-2.02738	5.77833	CLU
negative regulation of cell division (GO:0051782)	2019-01-12	0.0629265	0.14893	0.0542223	0.122983	-2.07666	5.74361	MYC
regulation of DNA-templated transcription, initiation (GO:2000142)	2019-01-11	0.057836	0.14893	0.0501562	0.122983	-2.01479	5.74245	TWIST1
macrophage differentiation (GO:0030225)	2019-01-12	0.0629265	0.14893	0.0542223	0.122983	-2.07273	5.73273	BMP4
regulation of RNA polymerase II transcriptional preinitiation complex assembly (GO:0045898)	2019-01-12	0.0629265	0.14893	0.0542223	0.122983	-2.03789	5.63638	HMGB1
intracellular protein transmembrane transport (GO:0065002)	2019-01-12	0.0629265	0.14893	0.0542223	0.122983	-2.02495	5.60058	AKT2
astrocyte development (GO:0014002)	2019-01-11	0.057836	0.14893	0.0501562	0.122983	-1.96182	5.59146	APP
mesonephros development (GO:0001823)	2019-01-12	0.0629265	0.14893	0.0542223	0.122983	-2.01766	5.58042	BMP4
regulation of actin filament depolymerization (GO:0030834)	2019-01-12	0.0629265	0.14893	0.0542223	0.122983	-2.00318	5.54037	VIL1
regulation of mitotic centrosome separation (GO:0046602)	2019-01-12	0.0629265	0.14893	0.0542223	0.122983	-2.00212	5.53745	RANBP3
negative regulation of morphogenesis of an epithelium (GO:1905331)	2019-01-12	0.0629265	0.14893	0.0542223	0.122983	-1.99934	5.52976	BMP4
regulation of phospholipase C activity (GO:1900274)	2019-01-11	0.057836	0.14893	0.0501562	0.122983	-1.93143	5.50486	PDGFRA
negative regulation of myotube differentiation (GO:0010832)	2019-01-12	0.0629265	0.14893	0.0542223	0.122983	-1.9899	5.50365	CEACAM5
sulfate transmembrane transport (GO:1902358)	2019-01-12	0.0629265	0.14893	0.0542223	0.122983	-1.98515	5.4905	SLC26A3
response to sterol (GO:0036314)	2019-01-12	0.0629265	0.14893	0.0542223	0.122983	-1.97715	5.46837	TGFB1
somite development (GO:0061053)	2019-01-12	0.0629265	0.14893	0.0542223	0.122983	-1.97363	5.45864	LOXL3
regulation of long-term neuronal synaptic plasticity (GO:0048169)	2019-01-12	0.0629265	0.14893	0.0542223	0.122983	-1.95692	5.41241	APP
negative regulation of nuclear division (GO:0051784)	2019-01-12	0.0629265	0.14893	0.0542223	0.122983	-1.91363	5.29271	BMP4
cellular copper ion homeostasis (GO:0006878)	2019-01-11	0.057836	0.14893	0.0501562	0.122983	-1.83309	5.22457	APP
regulation of histone phosphorylation (GO:0033127)	2019-01-11	0.057836	0.14893	0.0501562	0.122983	-1.83067	5.21767	TWIST1
pulmonary valve development (GO:0003177)	2019-01-11	0.057836	0.14893	0.0501562	0.122983	-1.81131	5.16251	BMP4
regulation of non-canonical Wnt signaling pathway (GO:2000050)	2019-01-12	0.0629265	0.14893	0.0542223	0.122983	-1.86502	5.15825	TIAM1
positive regulation of superoxide anion generation (GO:0032930)	2019-01-12	0.0629265	0.14893	0.0542223	0.122983	-1.85066	5.11854	TGFB1
spinal cord development (GO:0021510)	2019-01-12	0.0629265	0.14893	0.0542223	0.122983	-1.84454	5.10161	LOXL3
positive regulation of heterotypic cell-cell adhesion (GO:0034116)	2019-01-12	0.0629265	0.14893	0.0542223	0.122983	-1.82972	5.06062	CD44
regulation of blood vessel endothelial cell proliferation involved in sprouting angiogenesis (GO:1903587)	2019-01-12	0.0629265	0.14893	0.0542223	0.122983	-1.79074	4.95281	DLL4
mononuclear cell differentiation (GO:1903131)	2019-01-12	0.0629265	0.14893	0.0542223	0.122983	-1.76825	4.89062	BMP4
xenobiotic glucuronidation (GO:0052697)	2019-01-12	0.0629265	0.14893	0.0542223	0.122983	-1.75908	4.86524	UGT1A9
T-helper cell differentiation (GO:0042093)	2019-01-12	0.0629265	0.14893	0.0542223	0.122983	-1.75554	4.85546	HMGB1
regulation of trophoblast cell migration (GO:1901163)	2019-01-12	0.0629265	0.14893	0.0542223	0.122983	-1.71692	4.74863	TIMP1
positive regulation of glucose metabolic process (GO:0010907)	2019-01-12	0.0629265	0.14893	0.0542223	0.122983	-1.60388	4.43598	AKT2
positive regulation of extracellular matrix organization (GO:1903055)	2019-01-12	0.0629265	0.14893	0.0542223	0.122983	-1.56179	4.31959	TGFB1
mitotic nuclear division (GO:0140014)	1975-02-01	0.062156	0.14893	0.0429112	0.120173	-1.47194	4.08922	UBE2C;BIRC5
chaperone-mediated protein transport (GO:0072321)	2019-01-11	0.057836	0.14893	0.0501562	0.122983	-1.42193	4.05271	CLU
stress fiber assembly (GO:0043149)	2019-01-11	0.057836	0.14893	0.0501562	0.122983	-1.37825	3.92821	ITGB5
L-serine metabolic process (GO:0006563)	2019-01-12	0.0629265	0.14893	0.0542223	0.122983	-1.37168	3.79379	PSAT1
regulation of cardiac muscle cell differentiation (GO:2000725)	2019-01-12	0.0629265	0.14893	0.0542223	0.122983	-1.21514	3.36083	TGFB1
positive regulation of proteasomal protein catabolic process (GO:1901800)	1974-02-01	0.0607065	0.14893	0.0419097	0.118621	-1.19598	3.35079	DVL1;CLU
positive regulation of proteasomal ubiquitin-dependent protein catabolic process (GO:0032436)	1971-02-01	0.0564305	0.14893	0.0389598	0.118621	-1.13778	3.27082	DVL1;CLU
cell-cell junction organization (GO:0045216)	1973-02-01	0.059269	0.14893	0.0409173	0.118621	-1.13735	3.21376	TGFB1;TLN1
response to organic cyclic compound (GO:0014070)	1970-02-01	0.0550298	0.14893	0.0379951	0.117167	-1.10589	3.20695	CHRNB1;TGFB1
regulation of Notch signaling pathway (GO:0008593)	1971-02-01	0.0564305	0.14893	0.0389598	0.118621	-1.07902	3.10191	DLL4;EGFR
negative regulation of cell cycle (GO:0045786)	1973-02-01	0.059269	0.14893	0.0409173	0.118621	-1.09676	3.09907	BMP4;TGFB1
neuron projection morphogenesis (GO:0048812)	3/164	0.0592736	0.14893	0.0346329	0.115628	-1.01572	2.87001	APP;DVL1;DCLK1
positive regulation of epithelial cell migration (GO:0010634)	1975-02-01	0.062156	0.14893	0.0429112	0.120173	-1.01195	2.81131	VIL1;BMP4
canonical Wnt signaling pathway (GO:0060070)	1974-02-01	0.0607065	0.14893	0.0419097	0.118621	-0.98975	2.77299	MYC;DVL1
phosphorylation (GO:0016310)	5/387	0.0587768	0.14893	0.0259174	0.10276	-0.925918	2.62406	APP;TGFB1;ERBB2;BIRC5;DCLK1
positive regulation of cytokine secretion (GO:0050715)	1974-02-01	0.0607065	0.14893	0.0419097	0.118621	-0.925919	2.59415	TWIST1;HMGB1
negative regulation of cysteine-type endopeptidase activity (GO:2000117)	1973-02-01	0.059269	0.14893	0.0409173	0.118621	-0.867369	2.4509	FABP1;CD44
regulation of mitotic cell cycle (GO:0007346)	3/166	0.0610183	0.14893	0.0356869	0.117021	-0.874654	2.44604	APP;TGFB1;BIRC5
neuron projection development (GO:0031175)	3/168	0.0627869	0.14893	0.0367575	0.117021	-0.865913	2.39685	APP;HMGB1;DCLK1
negative regulation of phosphorylation (GO:0042326)	1976-02-01	0.0636172	0.149998	0.0439217	0.120173	-1.01875	2.80654	BMP4;TGFB1
C-terminal protein lipidation (GO:0006501)	1976-02-01	0.0636172	0.149998	0.0439217	0.120173	-0.998983	2.75207	CEACAM7;CEACAM5
transmembrane receptor protein tyrosine kinase signaling pathway (GO:0007169)	5/397	0.0641195	0.150898	0.0284843	0.109059	-0.947036	2.60151	PDGFRA;TIAM1;AKT2;ERBB2;EPHA2
positive regulation of JNK cascade (GO:0046330)	1977-02-01	0.06509	0.152608	0.044941	0.120173	-1.1242	3.0713	APP;HMGB1
transforming growth factor beta receptor signaling pathway (GO:0007179)	1977-02-01	0.06509	0.152608	0.044941	0.120173	-1.04369	2.85135	TGFB1;ITGB5
positive regulation of endoplasmic reticulum unfolded protein response (GO:1900103)	2019-01-13	0.0679897	0.153004	0.0582714	0.125354	-2.48124	6.67057	AGR2
regulation of skeletal muscle tissue development (GO:0048641)	2019-01-13	0.0679897	0.153004	0.0582714	0.125354	-2.32712	6.25623	TGFB1
DNA ligation involved in DNA repair (GO:0051103)	2019-01-13	0.0679897	0.153004	0.0582714	0.125354	-2.10628	5.66251	HMGB1
positive regulation of interleukin-1 production (GO:0032732)	2019-01-13	0.0679897	0.153004	0.0582714	0.125354	-2.0938	5.62897	HMGB1
cardiac right ventricle morphogenesis (GO:0003215)	2019-01-13	0.0679897	0.153004	0.0582714	0.125354	-2.07537	5.57941	TBX20
exit from mitosis (GO:0010458)	2019-01-13	0.0679897	0.153004	0.0582714	0.125354	-2.04898	5.50849	UBE2C
regulation of mesenchymal cell proliferation (GO:0010464)	2019-01-13	0.0679897	0.153004	0.0582714	0.125354	-2.02144	5.43444	MYC
positive regulation of cardiocyte differentiation (GO:1905209)	2019-01-13	0.0679897	0.153004	0.0582714	0.125354	-1.97558	5.31115	TGFB1
regulation of IRE1-mediated unfolded protein response (GO:1903894)	2019-01-13	0.0679897	0.153004	0.0582714	0.125354	-1.96935	5.2944	AGR2
negative regulation of histone modification (GO:0031057)	2019-01-13	0.0679897	0.153004	0.0582714	0.125354	-1.96169	5.27381	TWIST1
regulation of T cell differentiation in thymus (GO:0033081)	2019-01-13	0.0679897	0.153004	0.0582714	0.125354	-1.93721	5.20801	BMP4
aromatic compound biosynthetic process (GO:0019438)	2019-01-13	0.0679897	0.153004	0.0582714	0.125354	-1.91219	5.14072	PSAT1
entry of bacterium into host cell (GO:0035635)	2019-01-13	0.0679897	0.153004	0.0582714	0.125354	-1.91111	5.13783	MET
serine family amino acid biosynthetic process (GO:0009070)	2019-01-13	0.0679897	0.153004	0.0582714	0.125354	-1.90539	5.12244	PSAT1
pyrimidine nucleoside salvage (GO:0043097)	2019-01-13	0.0679897	0.153004	0.0582714	0.125354	-1.86779	5.02136	TK1
protein insertion into membrane (GO:0051205)	2019-01-13	0.0679897	0.153004	0.0582714	0.125354	-1.85494	4.98682	EGFR
negative regulation of protein oligomerization (GO:0032460)	2019-01-13	0.0679897	0.153004	0.0582714	0.125354	-1.83386	4.93015	CLU
positive regulation of protein depolymerization (GO:1901881)	2019-01-13	0.0679897	0.153004	0.0582714	0.125354	-1.79993	4.83893	VIL1
endochondral bone morphogenesis (GO:0060350)	2019-01-13	0.0679897	0.153004	0.0582714	0.125354	-1.56261	4.20093	BMP4
pyrimidine-containing compound salvage (GO:0008655)	2019-01-13	0.0679897	0.153004	0.0582714	0.125354	-1.52049	4.08768	TK1
regulation of vascular endothelial cell proliferation (GO:1905562)	2019-01-13	0.0679897	0.153004	0.0582714	0.125354	-1.39393	3.74744	HMGB1
positive regulation of translation (GO:0045727)	1979-02-01	0.0680698	0.153004	0.0470059	0.122352	-0.968446	2.60243	TGFB1;ERBB2
response to ionizing radiation (GO:0010212)	1978-02-01	0.0665743	0.153004	0.0459691	0.120173	-0.879562	2.38312	MYC;ECT2
anaphase-promoting complex-dependent catabolic process (GO:0031145)	1980-02-01	0.0695765	0.155831	0.0480513	0.122983	-1.05313	2.80694	PTTG1;UBE2C
peptidyl-tyrosine phosphorylation (GO:0018108)	1980-02-01	0.0695765	0.155831	0.0480513	0.122983	-1.01599	2.70794	PDGFRA;EGFR
mammary gland epithelium development (GO:0061180)	2019-01-14	0.0730258	0.156288	0.0623034	0.128248	-2.39785	6.27504	AKT2
regulation of endothelial cell chemotaxis (GO:2001026)	2019-01-14	0.0730258	0.156288	0.0623034	0.128248	-2.3538	6.15977	MET
Notch receptor processing, ligand-dependent (GO:0035333)	2019-01-14	0.0730258	0.156288	0.0623034	0.128248	-2.10658	5.51279	DLL4
cellular response to low-density lipoprotein particle stimulus (GO:0071404)	2019-01-14	0.0730258	0.156288	0.0623034	0.128248	-2.0625	5.39744	CD9
positive regulation of endothelial cell chemotaxis (GO:2001028)	2019-01-14	0.0730258	0.156288	0.0623034	0.128248	-1.99139	5.21134	MET
atrial septum development (GO:0003283)	2019-01-14	0.0730258	0.156288	0.0623034	0.128248	-1.99111	5.21062	TBX20
neuron fate commitment (GO:0048663)	2019-01-14	0.0730258	0.156288	0.0623034	0.128248	-1.8912	4.94917	DLL4
positive regulation of cellular carbohydrate metabolic process (GO:0010676)	2019-01-14	0.0730258	0.156288	0.0623034	0.128248	-1.85166	4.84568	AKT2
response to iron ion (GO:0010039)	2019-01-14	0.0730258	0.156288	0.0623034	0.128248	-1.83856	4.81142	BMP6
positive regulation of interleukin-17 production (GO:0032740)	2019-01-14	0.0730258	0.156288	0.0623034	0.128248	-1.79002	4.68437	TGFB1
positive regulation of glycogen biosynthetic process (GO:0045725)	2019-01-14	0.0730258	0.156288	0.0623034	0.128248	-1.74533	4.56742	AKT2
DNA damage response, signal transduction by p53 class mediator resulting in transcription of p21 class mediator (GO:0006978)	2019-01-14	0.0730258	0.156288	0.0623034	0.128248	-1.74045	4.55465	MUC1
regulation of DNA-templated transcription in response to stress (GO:0043620)	2019-01-14	0.0730258	0.156288	0.0623034	0.128248	-1.73803	4.54831	MUC1
regulation of superoxide anion generation (GO:0032928)	2019-01-14	0.0730258	0.156288	0.0623034	0.128248	-1.73006	4.52746	TGFB1
pathway-restricted SMAD protein phosphorylation (GO:0060389)	2019-01-14	0.0730258	0.156288	0.0623034	0.128248	-1.70708	4.46732	TGFB1
copper ion homeostasis (GO:0055070)	2019-01-14	0.0730258	0.156288	0.0623034	0.128248	-1.70584	4.46409	APP
regulation of biomineral tissue development (GO:0070167)	2019-01-14	0.0730258	0.156288	0.0623034	0.128248	-1.67376	4.38013	TWIST1
positive regulation of cardiac muscle cell proliferation (GO:0060045)	2019-01-14	0.0730258	0.156288	0.0623034	0.128248	-1.664	4.3546	TBX20
water transport (GO:0006833)	2019-01-14	0.0730258	0.156288	0.0623034	0.128248	-1.59613	4.17698	AQP5
regulation of NMDA receptor activity (GO:2000310)	2019-01-14	0.0730258	0.156288	0.0623034	0.128248	-1.57934	4.13304	APP
negative regulation of MAPK cascade (GO:0043409)	1981-02-01	0.0710941	0.156288	0.0491051	0.122983	-1.06155	2.80647	BMP4;MYC
protein autophosphorylation (GO:0046777)	3/176	0.0700969	0.156288	0.0412038	0.118621	-1.03941	2.76262	PDGFRA;ERBB2;EGFR
regulation of angiogenesis (GO:0045765)	3/178	0.0719822	0.156288	0.0423562	0.119437	-1.02178	2.68864	ERBB2;TWIST1;EPHA2
negative regulation of cell cycle process (GO:0010948)	1982-02-01	0.0726225	0.156288	0.0501674	0.122983	-0.967317	2.53677	BMP4;BMI1
positive regulation of stress-activated MAPK cascade (GO:0032874)	1981-02-01	0.0710941	0.156288	0.0491051	0.122983	-0.913672	2.41552	APP;HMGB1
negative regulation of protein phosphorylation (GO:0001933)	3/179	0.0729334	0.156288	0.0429384	0.120173	-0.864386	2.26314	TGFB1;DVL1;TWIST1
ephrin receptor signaling pathway (GO:0048013)	1983-02-01	0.0741616	0.157909	0.051238	0.122983	-0.991144	2.57847	TIAM1;EPHA2
positive regulation of protein secretion (GO:0050714)	1983-02-01	0.0741616	0.157909	0.051238	0.122983	-0.934438	2.43095	TGFB1;BMP6
C-terminal protein amino acid modification (GO:0018410)	1983-02-01	0.0741616	0.157909	0.051238	0.122983	-0.911239	2.3706	CEACAM7;CEACAM5
glucuronate metabolic process (GO:0019585)	2019-01-15	0.078035	0.160164	0.0663184	0.131378	-2.09413	5.34128	UGT1A9
DNA damage response, signal transduction resulting in transcription (GO:0042772)	2019-01-15	0.078035	0.160164	0.0663184	0.131378	-1.89685	4.83811	MUC1
regulation of neural precursor cell proliferation (GO:2000177)	2019-01-15	0.078035	0.160164	0.0663184	0.131378	-1.89222	4.8263	DLL4
negative regulation of Rho protein signal transduction (GO:0035024)	2019-01-15	0.078035	0.160164	0.0663184	0.131378	-1.8384	4.68903	MET
epiboly involved in wound healing (GO:0090505)	2019-01-15	0.078035	0.160164	0.0663184	0.131378	-1.81838	4.63796	CD44
negative regulation of hydrogen peroxide-induced cell death (GO:1903206)	2019-01-15	0.078035	0.160164	0.0663184	0.131378	-1.80434	4.60215	MET
negative regulation of cell migration involved in sprouting angiogenesis (GO:0090051)	2019-01-15	0.078035	0.160164	0.0663184	0.131378	-1.79564	4.57995	DLL4
regulation of platelet aggregation (GO:0090330)	2019-01-15	0.078035	0.160164	0.0663184	0.131378	-1.78468	4.55199	CD9
branching involved in blood vessel morphogenesis (GO:0001569)	2019-01-15	0.078035	0.160164	0.0663184	0.131378	-1.76147	4.4928	DLL4
nucleoside salvage (GO:0043174)	2019-01-15	0.078035	0.160164	0.0663184	0.131378	-1.75779	4.48343	TK1
fluid transport (GO:0042044)	2019-01-15	0.078035	0.160164	0.0663184	0.131378	-1.72709	4.4051	AQP5
positive regulation of glycogen metabolic process (GO:0070875)	2019-01-15	0.078035	0.160164	0.0663184	0.131378	-1.71375	4.37108	AKT2
regulation of extracellular matrix disassembly (GO:0010715)	2019-01-15	0.078035	0.160164	0.0663184	0.131378	-1.70871	4.35823	TGFB1
regulation of monocyte differentiation (GO:0045655)	2019-01-15	0.078035	0.160164	0.0663184	0.131378	-1.70748	4.35509	MYC
regulation of fibroblast migration (GO:0010762)	2019-01-15	0.078035	0.160164	0.0663184	0.131378	-1.70046	4.33719	TGFB1
regulation of mRNA catabolic process (GO:0061013)	2019-01-15	0.078035	0.160164	0.0663184	0.131378	-1.63218	4.16303	PKP3
regulation of cyclin-dependent protein serine/threonine kinase activity involved in G1/S transition of mitotic cell cycle (GO:0031657)	2019-01-15	0.078035	0.160164	0.0663184	0.131378	-1.60309	4.08884	EGFR
positive regulation of neural precursor cell proliferation (GO:2000179)	2019-01-15	0.078035	0.160164	0.0663184	0.131378	-1.56588	3.99394	DLL4
myeloid dendritic cell activation (GO:0001773)	2019-01-15	0.078035	0.160164	0.0663184	0.131378	-1.35072	3.44515	HMGB1
positive regulation of protein ubiquitination (GO:0031398)	1984-02-01	0.0757111	0.160164	0.0523169	0.122983	-0.962318	2.48358	BMI1;CLU
regulation of neuron differentiation (GO:0045664)	1985-02-01	0.0772709	0.160164	0.0534039	0.122983	-0.890868	2.28101	TIAM1;ECT2
negative regulation of endopeptidase activity (GO:0010951)	1984-02-01	0.0757111	0.160164	0.0523169	0.122983	-0.813502	2.09951	TIMP1;SERPINB5
positive regulation of NF-kappaB import into nucleus (GO:0042346)	2019-01-16	0.0830173	0.162657	0.0703165	0.132585	-1.97358	4.91166	APP
myeloid cell development (GO:0061515)	2019-01-16	0.0830173	0.162657	0.0703165	0.132585	-1.95174	4.85732	APP
negative regulation of cell aging (GO:0090344)	2019-01-16	0.0830173	0.162657	0.0703165	0.132585	-1.92185	4.78293	TWIST1
regulation of branching involved in ureteric bud morphogenesis (GO:0090189)	2019-01-16	0.0830173	0.162657	0.0703165	0.132585	-1.91089	4.75565	BMP4
regulation of mitotic metaphase/anaphase transition (GO:0030071)	2019-01-16	0.0830173	0.162657	0.0703165	0.132585	-1.89141	4.70717	UBE2C
mesenchyme morphogenesis (GO:0072132)	2019-01-16	0.0830173	0.162657	0.0703165	0.132585	-1.89047	4.70483	TBX20
negative regulation of release of cytochrome c from mitochondria (GO:0090201)	2019-01-16	0.0830173	0.162657	0.0703165	0.132585	-1.88349	4.68745	CLU
retinoic acid metabolic process (GO:0042573)	2019-01-16	0.0830173	0.162657	0.0703165	0.132585	-1.78342	4.43842	UGT1A9
negative regulation of cytokine production involved in immune response (GO:0002719)	2019-01-16	0.0830173	0.162657	0.0703165	0.132585	-1.77411	4.41523	TGFB1
pyrimidine nucleoside biosynthetic process (GO:0046134)	2019-01-16	0.0830173	0.162657	0.0703165	0.132585	-1.76437	4.39099	TK1
presynapse assembly (GO:0099054)	2019-01-16	0.0830173	0.162657	0.0703165	0.132585	-1.7388	4.32737	DVL1
regulation of exit from mitosis (GO:0007096)	2019-01-16	0.0830173	0.162657	0.0703165	0.132585	-1.71554	4.26947	UBE2C
apoptotic DNA fragmentation (GO:0006309)	2019-01-16	0.0830173	0.162657	0.0703165	0.132585	-1.69453	4.21719	HMGB1
negative regulation of cellular component movement (GO:0051271)	2019-01-16	0.0830173	0.162657	0.0703165	0.132585	-1.67107	4.1588	CD9
negative regulation of RNA metabolic process (GO:0051253)	2019-01-16	0.0830173	0.162657	0.0703165	0.132585	-1.65803	4.12634	TGFB1
transport along microtubule (GO:0010970)	2019-01-16	0.0830173	0.162657	0.0703165	0.132585	-1.62515	4.04452	APP
negative regulation of insulin secretion (GO:0046676)	2019-01-16	0.0830173	0.162657	0.0703165	0.132585	-1.61589	4.02149	FAM3D
response to cholesterol (GO:0070723)	2019-01-16	0.0830173	0.162657	0.0703165	0.132585	-1.61108	4.00951	TGFB1
vasculature development (GO:0001944)	2019-01-16	0.0830173	0.162657	0.0703165	0.132585	-1.58242	3.93817	PDGFRA
sulfate transport (GO:0008272)	2019-01-16	0.0830173	0.162657	0.0703165	0.132585	-1.5483	3.85326	SLC26A3
endocardial cushion morphogenesis (GO:0003203)	2019-01-16	0.0830173	0.162657	0.0703165	0.132585	-1.54342	3.84112	TBX20
negative regulation of anoikis (GO:2000811)	2019-01-16	0.0830173	0.162657	0.0703165	0.132585	-1.47754	3.67717	CEACAM5
endoderm development (GO:0007492)	2019-01-16	0.0830173	0.162657	0.0703165	0.132585	-1.46752	3.65221	TBX20
inhibition of cysteine-type endopeptidase activity (GO:0097340)	2019-01-16	0.0830173	0.162657	0.0703165	0.132585	-1.44751	3.60242	BIRC5
negative regulation of platelet-derived growth factor receptor signaling pathway (GO:0010642)	2019-01-16	0.0830173	0.162657	0.0703165	0.132585	-1.44043	3.58481	PDGFRA
regulation of protein homooligomerization (GO:0032462)	2019-01-16	0.0830173	0.162657	0.0703165	0.132585	-1.42744	3.55248	CLU
regulation of cartilage development (GO:0061035)	2019-01-16	0.0830173	0.162657	0.0703165	0.132585	-1.37591	3.42423	BMP4
positive regulation of protein ubiquitination involved in ubiquitin-dependent protein catabolic process (GO:2000060)	1988-02-01	0.0820108	0.162657	0.0567128	0.125354	-1.13839	2.847	UBE2C;CLU
positive regulation of cellular component biogenesis (GO:0044089)	1988-02-01	0.0820108	0.162657	0.0567128	0.125354	-1.02861	2.57245	VIL1;TGFB1
Wnt signaling pathway, planar cell polarity pathway (GO:0060071)	1989-02-01	0.0836104	0.163053	0.0578316	0.125354	-1.12987	2.80387	TIAM1;DVL1
positive regulation of protein complex assembly (GO:0031334)	1989-02-01	0.0836104	0.163053	0.0578316	0.125354	-1.12817	2.79965	TGFB1;TWIST1
regulation of proteasomal ubiquitin-dependent protein catabolic process (GO:0032434)	1989-02-01	0.0836104	0.163053	0.0578316	0.125354	-1.00344	2.49013	DVL1;CLU
regulation of water loss via skin (GO:0033561)	2019-01-17	0.087973	0.164884	0.0742977	0.135205	-2.06478	5.01891	MET
establishment of skin barrier (GO:0061436)	2019-01-17	0.087973	0.164884	0.0742977	0.135205	-2.03695	4.95127	MET
neuron apoptotic process (GO:0051402)	2019-01-17	0.087973	0.164884	0.0742977	0.135205	-1.83662	4.46431	APP
regulation of stem cell proliferation (GO:0072091)	2019-01-17	0.087973	0.164884	0.0742977	0.135205	-1.83461	4.45944	EPCAM
Notch receptor processing (GO:0007220)	2019-01-17	0.087973	0.164884	0.0742977	0.135205	-1.82336	4.4321	DLL4
negative regulation of DNA replication (GO:0008156)	2019-01-17	0.087973	0.164884	0.0742977	0.135205	-1.80816	4.39513	TGFB1
extracellular matrix assembly (GO:0085029)	2019-01-17	0.087973	0.164884	0.0742977	0.135205	-1.73874	4.22639	TGFB1
bone morphogenesis (GO:0060349)	2019-01-17	0.087973	0.164884	0.0742977	0.135205	-1.71334	4.16465	MMP13
dendritic cell chemotaxis (GO:0002407)	2019-01-17	0.087973	0.164884	0.0742977	0.135205	-1.65788	4.02985	HMGB1
regulation of actin nucleation (GO:0051125)	2019-01-17	0.087973	0.164884	0.0742977	0.135205	-1.64517	3.99895	VIL1
positive regulation of cardiac muscle tissue growth (GO:0055023)	2019-01-17	0.087973	0.164884	0.0742977	0.135205	-1.64403	3.99617	TBX20
postsynaptic membrane organization (GO:0001941)	2019-01-17	0.087973	0.164884	0.0742977	0.135205	-1.6436	3.99513	CHRNB1
negative regulation of peptide hormone secretion (GO:0090278)	2019-01-17	0.087973	0.164884	0.0742977	0.135205	-1.63578	3.97613	FAM3D
lipopolysaccharide-mediated signaling pathway (GO:0031663)	2019-01-17	0.087973	0.164884	0.0742977	0.135205	-1.61841	3.9339	TGFB1
regulation of intrinsic apoptotic signaling pathway in response to DNA damage (GO:1902229)	2019-01-17	0.087973	0.164884	0.0742977	0.135205	-1.56822	3.81192	CLU
cardiac ventricle development (GO:0003231)	2019-01-17	0.087973	0.164884	0.0742977	0.135205	-1.54924	3.76579	DLL4
negative regulation of striated muscle cell differentiation (GO:0051154)	2019-01-17	0.087973	0.164884	0.0742977	0.135205	-1.47035	3.57401	CEACAM5
positive regulation of DNA-templated transcription, initiation (GO:2000144)	2019-01-17	0.087973	0.164884	0.0742977	0.135205	-1.35932	3.30413	TWIST1
embryonic digit morphogenesis (GO:0042733)	2019-01-17	0.087973	0.164884	0.0742977	0.135205	-1.25733	3.05621	TWIST1
mesenchyme development (GO:0060485)	2019-01-17	0.087973	0.164884	0.0742977	0.135205	-1.18499	2.8804	BMP4
aorta morphogenesis (GO:0035909)	2019-01-17	0.087973	0.164884	0.0742977	0.135205	-1.15353	2.80391	DLL4
embryonic heart tube development (GO:0035050)	2019-01-17	0.087973	0.164884	0.0742977	0.135205	-1.12445	2.73324	TBX20
regulation of cell cycle process (GO:0010564)	1991-02-01	0.0868382	0.164884	0.060092	0.128248	-1.00115	2.44653	AKT2;ECT2
regulation of establishment of planar polarity (GO:0090175)	1990-02-01	0.0852196	0.164884	0.058958	0.126613	-0.955917	2.35397	TIAM1;DVL1
positive regulation of response to external stimulus (GO:0032103)	1991-02-01	0.0868382	0.164884	0.060092	0.128248	-0.939404	2.29563	TGFB1;BMP6
protein homooligomerization (GO:0051260)	3/191	0.0847807	0.164884	0.0502386	0.122983	-0.892998	2.20364	TK1;ECT2;OLFM4
positive regulation of cellular protein metabolic process (GO:0032270)	1992-02-01	0.088466	0.16556	0.0612337	0.128248	-0.887561	2.15246	TGFB1;ERBB2
positive regulation of macrophage activation (GO:0043032)	2019-01-18	0.0929021	0.166877	0.0782622	0.136849	-2.00726	4.76966	APP
positive regulation of stem cell proliferation (GO:2000648)	2019-01-18	0.0929021	0.166877	0.0782622	0.136849	-1.92319	4.5699	EPCAM
negative regulation of stress fiber assembly (GO:0051497)	2019-01-18	0.0929021	0.166877	0.0782622	0.136849	-1.80612	4.29172	MET
regulation of transcription from RNA polymerase I promoter (GO:0006356)	2019-01-18	0.0929021	0.166877	0.0782622	0.136849	-1.78378	4.23863	ERBB2
macrophage activation (GO:0042116)	2019-01-18	0.0929021	0.166877	0.0782622	0.136849	-1.72947	4.10959	CLU
histone H2A monoubiquitination (GO:0035518)	2019-01-18	0.0929021	0.166877	0.0782622	0.136849	-1.71334	4.07125	BMI1
pharyngeal system development (GO:0060037)	2019-01-18	0.0929021	0.166877	0.0782622	0.136849	-1.71145	4.06676	BMP4
cellular glucuronidation (GO:0052695)	2019-01-18	0.0929021	0.166877	0.0782622	0.136849	-1.68955	4.01473	UGT1A9
positive regulation of striated muscle cell differentiation (GO:0051155)	2019-01-18	0.0929021	0.166877	0.0782622	0.136849	-1.5769	3.74703	TGFB1
ureteric bud development (GO:0001657)	2019-01-18	0.0929021	0.166877	0.0782622	0.136849	-1.57004	3.73075	BMP4
positive regulation of monocyte chemotaxis (GO:0090026)	2019-01-18	0.0929021	0.166877	0.0782622	0.136849	-1.56875	3.72768	HMGB1
positive regulation of epidermal cell differentiation (GO:0045606)	2019-01-18	0.0929021	0.166877	0.0782622	0.136849	-1.56663	3.72263	BMP4
regulation of tissue remodeling (GO:0034103)	2019-01-18	0.0929021	0.166877	0.0782622	0.136849	-1.56447	3.71751	TGFB1
regulation of multicellular organism growth (GO:0040014)	2019-01-18	0.0929021	0.166877	0.0782622	0.136849	-1.54466	3.67042	APP
positive regulation of focal adhesion assembly (GO:0051894)	2019-01-18	0.0929021	0.166877	0.0782622	0.136849	-1.53862	3.65609	LIMS1
positive regulation of cartilage development (GO:0061036)	2019-01-18	0.0929021	0.166877	0.0782622	0.136849	-1.49894	3.56178	BMP4
reverse cholesterol transport (GO:0043691)	2019-01-18	0.0929021	0.166877	0.0782622	0.136849	-1.49674	3.55657	CLU
positive regulation of nitrogen compound metabolic process (GO:0051173)	2019-01-18	0.0929021	0.166877	0.0782622	0.136849	-1.46849	3.48944	APP
positive regulation of response to biotic stimulus (GO:0002833)	2019-01-18	0.0929021	0.166877	0.0782622	0.136849	-1.44231	3.42724	BMP6
positive regulation of lymphocyte migration (GO:2000403)	2019-01-18	0.0929021	0.166877	0.0782622	0.136849	-1.42997	3.3979	APP
cardiac myofibril assembly (GO:0055003)	2019-01-18	0.0929021	0.166877	0.0782622	0.136849	-1.42189	3.37871	PDGFRA
platelet-derived growth factor receptor signaling pathway (GO:0048008)	2019-01-18	0.0929021	0.166877	0.0782622	0.136849	-1.4022	3.33192	PDGFRA
mesonephric tubule development (GO:0072164)	2019-01-18	0.0929021	0.166877	0.0782622	0.136849	-1.3891	3.30079	BMP4
positive chemotaxis (GO:0050918)	2019-01-18	0.0929021	0.166877	0.0782622	0.136849	-1.33963	3.18323	MET
chaperone-mediated protein complex assembly (GO:0051131)	2019-01-18	0.0929021	0.166877	0.0782622	0.136849	-1.22966	2.92192	CLU
regulation of T cell migration (GO:2000404)	2019-01-18	0.0929021	0.166877	0.0782622	0.136849	-1.08839	2.58624	APP
nuclear export (GO:0051168)	1993-02-01	0.090103	0.166877	0.0623827	0.128248	-0.959114	2.3084	TGFB1;RANBP3
cell cycle G1/S phase transition (GO:0044843)	1993-02-01	0.090103	0.166877	0.0623827	0.128248	-0.806234	1.94045	RANBP3;MYC
cellular response to fibroblast growth factor stimulus (GO:0044344)	1995-02-01	0.0934038	0.167298	0.064703	0.131378	-1.02979	2.44146	DLL4;CD44
skin development (GO:0043588)	1995-02-01	0.0934038	0.167298	0.064703	0.131378	-0.936104	2.21934	MET;EPHA2
regulation of cellular response to transforming growth factor beta stimulus (GO:1903844)	2019-01-19	0.0978049	0.171983	0.0822099	0.140996	-1.77036	4.11569	TGFB1
modulation by virus of host morphology or physiology (GO:0019048)	2019-01-19	0.0978049	0.171983	0.0822099	0.140996	-1.76742	4.10886	TGFB1
regulation of lipopolysaccharide-mediated signaling pathway (GO:0031664)	2019-01-19	0.0978049	0.171983	0.0822099	0.140996	-1.67398	3.89164	BMP6
negative regulation of fibroblast proliferation (GO:0048147)	2019-01-19	0.0978049	0.171983	0.0822099	0.140996	-1.66082	3.86104	MYC
release of cytochrome c from mitochondria (GO:0001836)	2019-01-19	0.0978049	0.171983	0.0822099	0.140996	-1.60546	3.73234	CLU
actin filament polymerization (GO:0030041)	2019-01-19	0.0978049	0.171983	0.0822099	0.140996	-1.60036	3.72049	VIL1
positive regulation of morphogenesis of an epithelium (GO:1905332)	2019-01-19	0.0978049	0.171983	0.0822099	0.140996	-1.572	3.65454	BMP4
heart trabecula morphogenesis (GO:0061384)	2019-01-19	0.0978049	0.171983	0.0822099	0.140996	-1.56717	3.64332	DLL4
regulation of cardiac muscle cell proliferation (GO:0060043)	2019-01-19	0.0978049	0.171983	0.0822099	0.140996	-1.56197	3.63124	TBX20
DNA ligation (GO:0006266)	2019-01-19	0.0978049	0.171983	0.0822099	0.140996	-1.28835	2.99513	HMGB1
homologous chromosome segregation (GO:0045143)	2019-01-19	0.0978049	0.171983	0.0822099	0.140996	-1.24338	2.8906	PTTG1
DNA conformation change (GO:0071103)	2019-01-19	0.0978049	0.171983	0.0822099	0.140996	-1.0079	2.34314	HMGB1
regulation of cell growth (GO:0001558)	3/202	0.0963142	0.171983	0.0574288	0.125354	-0.63826	1.49362	TGFB1;ERBB2;EGFR
protein localization to organelle (GO:0033365)	1998-02-01	0.0984198	0.172579	0.0682373	0.132585	-0.915888	2.1235	BMP4;DVL1
cell morphogenesis involved in neuron differentiation (GO:0048667)	1998-02-01	0.0984198	0.172579	0.0682373	0.132585	-0.739732	1.71508	APP;DVL1
positive regulation of toll-like receptor signaling pathway (GO:0034123)	2019-01-20	0.102681	0.173961	0.086141	0.142846	-1.93364	4.4012	HMGB1
positive regulation of pri-miRNA transcription from RNA polymerase II promoter (GO:1902895)	2019-01-20	0.102681	0.173961	0.086141	0.142846	-1.73758	3.95494	TGFB1
regulation of long-term synaptic potentiation (GO:1900271)	2019-01-20	0.102681	0.173961	0.086141	0.142846	-1.69682	3.86217	APP
positive regulation of phospholipase activity (GO:0010518)	2019-01-20	0.102681	0.173961	0.086141	0.142846	-1.60368	3.65018	PDGFRA
negative regulation of protein localization to cell periphery (GO:1904376)	2019-01-20	0.102681	0.173961	0.086141	0.142846	-1.59467	3.62967	TGFB1
endothelial cell development (GO:0001885)	2019-01-20	0.102681	0.173961	0.086141	0.142846	-1.56963	3.57267	MET
morphogenesis of an epithelium (GO:0002009)	2019-01-20	0.102681	0.173961	0.086141	0.142846	-1.56928	3.57188	VCL
Rac protein signal transduction (GO:0016601)	2019-01-20	0.102681	0.173961	0.086141	0.142846	-1.56026	3.55136	TIAM1
regulation of platelet activation (GO:0010543)	2019-01-20	0.102681	0.173961	0.086141	0.142846	-1.55626	3.54225	PDGFRA
positive regulation of epithelial cell differentiation (GO:0030858)	2019-01-20	0.102681	0.173961	0.086141	0.142846	-1.54775	3.52287	BMP4
osteoclast differentiation (GO:0030316)	2019-01-20	0.102681	0.173961	0.086141	0.142846	-1.53481	3.49342	EPHA2
negative regulation of phosphate metabolic process (GO:0045936)	2019-01-20	0.102681	0.173961	0.086141	0.142846	-1.52856	3.47919	BMP4
muscle tissue morphogenesis (GO:0060415)	2019-01-20	0.102681	0.173961	0.086141	0.142846	-1.46861	3.34273	TBX20
negative regulation of protein localization to plasma membrane (GO:1903077)	2019-01-20	0.102681	0.173961	0.086141	0.142846	-1.45141	3.30359	TGFB1
positive regulation of mononuclear cell migration (GO:0071677)	2019-01-20	0.102681	0.173961	0.086141	0.142846	-1.40636	3.20104	HMGB1
negative regulation of double-strand break repair (GO:2000780)	2019-01-20	0.102681	0.173961	0.086141	0.142846	-1.37216	3.1232	TWIST1
regulation of myotube differentiation (GO:0010830)	2019-01-20	0.102681	0.173961	0.086141	0.142846	-1.34231	3.05526	CEACAM5
regulation of catenin import into nucleus (GO:0035412)	2019-01-20	0.102681	0.173961	0.086141	0.142846	-1.32498	3.01581	EGFR
protein targeting to lysosome (GO:0006622)	2019-01-20	0.102681	0.173961	0.086141	0.142846	-1.29699	2.95212	CLU
positive regulation of activated T cell proliferation (GO:0042104)	2019-01-20	0.102681	0.173961	0.086141	0.142846	-1.26872	2.88776	HMGB1
regulation of cAMP biosynthetic process (GO:0030817)	2019-01-20	0.102681	0.173961	0.086141	0.142846	-1.23911	2.82036	CAP2
regulation of heterotypic cell-cell adhesion (GO:0034114)	2019-01-20	0.102681	0.173961	0.086141	0.142846	-1.19758	2.72584	CD44
positive regulation of adherens junction organization (GO:1903393)	2019-01-20	0.102681	0.173961	0.086141	0.142846	-1.11523	2.53841	LIMS1
positive regulation of cell growth (GO:0030307)	1999-02-01	0.100109	0.173961	0.0694295	0.132585	-0.885371	2.03768	ERBB2;EGFR
response to UV (GO:0009411)	1999-02-01	0.100109	0.173961	0.0694295	0.132585	-0.809439	1.86292	MYC;EGFR
regulation of lipid metabolic process (GO:0019216)	2/101	0.10351	0.175128	0.0718345	0.13504	-0.844575	1.91557	FABP1;UGT1A9
glial cell development (GO:0021782)	2019-01-21	0.107532	0.177612	0.0900556	0.14586	-1.76217	3.92959	APP
regulation of anoikis (GO:2000209)	2019-01-21	0.107532	0.177612	0.0900556	0.14586	-1.60978	3.58975	CEACAM5
positive regulation of T cell migration (GO:2000406)	2019-01-21	0.107532	0.177612	0.0900556	0.14586	-1.57042	3.50198	APP
steroid hormone mediated signaling pathway (GO:0043401)	2019-01-21	0.107532	0.177612	0.0900556	0.14586	-1.54505	3.4454	BMP4
dorsal/ventral pattern formation (GO:0009953)	2019-01-21	0.107532	0.177612	0.0900556	0.14586	-1.53558	3.42429	TBX20
mesoderm formation (GO:0001707)	2019-01-21	0.107532	0.177612	0.0900556	0.14586	-1.5014	3.34808	TBX20
regulation of epidermal cell differentiation (GO:0045604)	2019-01-21	0.107532	0.177612	0.0900556	0.14586	-1.45513	3.24489	BMP4
negative regulation of macromolecule biosynthetic process (GO:0010558)	2019-01-21	0.107532	0.177612	0.0900556	0.14586	-1.43375	3.19723	TGFB1
negative regulation of actin filament bundle assembly (GO:0032232)	2019-01-21	0.107532	0.177612	0.0900556	0.14586	-1.41397	3.15312	MET
response to progesterone (GO:0032570)	2019-01-21	0.107532	0.177612	0.0900556	0.14586	-1.39388	3.10831	TGFB1
regulation of glycogen biosynthetic process (GO:0005979)	2019-01-21	0.107532	0.177612	0.0900556	0.14586	-1.39182	3.10373	AKT2
embryonic digestive tract development (GO:0048566)	2019-01-21	0.107532	0.177612	0.0900556	0.14586	-1.33951	2.98707	PDGFRA
wound healing, spreading of cells (GO:0044319)	2019-01-21	0.107532	0.177612	0.0900556	0.14586	-1.29985	2.89862	CD44
striated muscle cell development (GO:0055002)	2019-01-21	0.107532	0.177612	0.0900556	0.14586	-1.26038	2.8106	CHRNB1
neuromuscular junction development (GO:0007528)	2019-01-21	0.107532	0.177612	0.0900556	0.14586	-1.22751	2.73732	DVL1
negative regulation of interferon-gamma production (GO:0032689)	2019-01-21	0.107532	0.177612	0.0900556	0.14586	-1.02448	2.28456	HMGB1
cellular response to steroid hormone stimulus (GO:0071383)	2019-01-21	0.107532	0.177612	0.0900556	0.14586	-0.970473	2.16413	BMP4
cellular response to estradiol stimulus (GO:0071392)	2019-01-21	0.107532	0.177612	0.0900556	0.14586	-0.86872	1.93722	EGFR
protein import into nucleus (GO:0006606)	2/104	0.108672	0.179258	0.0754924	0.136849	-0.856223	1.90032	TGFB1;RANBP3
response to nicotine (GO:0035094)	2019-01-22	0.112356	0.18151	0.0939536	0.148899	-1.74237	3.80897	CHRNB1
negative regulation of G-protein coupled receptor protein signaling pathway (GO:0045744)	2019-01-22	0.112356	0.18151	0.0939536	0.148899	-1.66322	3.63594	MET
positive regulation of BMP signaling pathway (GO:0030513)	2019-01-22	0.112356	0.18151	0.0939536	0.148899	-1.62366	3.54945	BMP4
protein-DNA complex disassembly (GO:0032986)	2019-01-22	0.112356	0.18151	0.0939536	0.148899	-1.58144	3.45716	MYC
meiosis I (GO:0007127)	2019-01-22	0.112356	0.18151	0.0939536	0.148899	-1.52734	3.3389	PTTG1
positive regulation of lamellipodium organization (GO:1902745)	2019-01-22	0.112356	0.18151	0.0939536	0.148899	-1.50782	3.29622	VIL1
energy reserve metabolic process (GO:0006112)	2019-01-22	0.112356	0.18151	0.0939536	0.148899	-1.4881	3.25311	MYC
positive regulation of histone acetylation (GO:0035066)	2019-01-22	0.112356	0.18151	0.0939536	0.148899	-1.39543	3.05053	MUC1
positive regulation of transcription from RNA polymerase I promoter (GO:0045943)	2019-01-22	0.112356	0.18151	0.0939536	0.148899	-1.37806	3.01255	ERBB2
hepaticobiliary system development (GO:0061008)	2019-01-22	0.112356	0.18151	0.0939536	0.148899	-1.33021	2.90795	MET
ERK1 and ERK2 cascade (GO:0070371)	2019-01-22	0.112356	0.18151	0.0939536	0.148899	-1.3066	2.85633	MYC
regulation of interleukin-17 production (GO:0032660)	2019-01-22	0.112356	0.18151	0.0939536	0.148899	-1.30442	2.85156	TGFB1
ventricular cardiac muscle tissue development (GO:0003229)	2019-01-22	0.112356	0.18151	0.0939536	0.148899	-1.27447	2.7861	TGFB1
embryonic skeletal system development (GO:0048706)	2019-01-22	0.112356	0.18151	0.0939536	0.148899	-1.09055	2.38403	PDGFRA
G1/S transition of mitotic cell cycle (GO:0000082)	2/106	0.11215	0.18151	0.0779637	0.136849	-0.738557	1.6159	RANBP3;MYC
regulation of cell cycle (GO:0051726)	3/216	0.11186	0.18151	0.0672471	0.132585	-0.630789	1.38175	BMP4;TGFB1;BIRC5
positive regulation of cellular catabolic process (GO:0031331)	2/107	0.113901	0.183768	0.0792089	0.138312	-0.714805	1.55286	AKT2;TWIST1
positive regulation of interleukin-10 production (GO:0032733)	2019-01-23	0.117155	0.184966	0.0978353	0.151409	-1.56322	3.35196	HMGB1
protein complex localization (GO:0031503)	2019-01-23	0.117155	0.184966	0.0978353	0.151409	-1.5503	3.32424	BIRC5
beta-catenin destruction complex disassembly (GO:1904886)	2019-01-23	0.117155	0.184966	0.0978353	0.151409	-1.53112	3.28313	DVL1
DNA catabolic process, endonucleolytic (GO:0000737)	2019-01-23	0.117155	0.184966	0.0978353	0.151409	-1.51729	3.25346	HMGB1
urogenital system development (GO:0001655)	2019-01-23	0.117155	0.184966	0.0978353	0.151409	-1.46163	3.13412	BMP4
negative regulation of response to endoplasmic reticulum stress (GO:1903573)	2019-01-23	0.117155	0.184966	0.0978353	0.151409	-1.39138	2.98347	CLU
negative regulation of actin filament polymerization (GO:0030837)	2019-01-23	0.117155	0.184966	0.0978353	0.151409	-1.37871	2.95631	VIL1
negative regulation of sprouting angiogenesis (GO:1903671)	2019-01-23	0.117155	0.184966	0.0978353	0.151409	-1.37732	2.95333	DLL4
regulation of membrane protein ectodomain proteolysis (GO:0051043)	2019-01-23	0.117155	0.184966	0.0978353	0.151409	-1.37503	2.94842	TIMP1
regulation of transcription from RNA polymerase III promoter (GO:0006359)	2019-01-23	0.117155	0.184966	0.0978353	0.151409	-1.35523	2.90596	ERBB2
protein localization to cell surface (GO:0034394)	2019-01-23	0.117155	0.184966	0.0978353	0.151409	-1.33679	2.86642	VCL
regulation of DNA biosynthetic process (GO:2000278)	2019-01-23	0.117155	0.184966	0.0978353	0.151409	-1.33374	2.85988	MYC
triglyceride catabolic process (GO:0019433)	2019-01-23	0.117155	0.184966	0.0978353	0.151409	-1.32622	2.84376	FABP1
activation of phospholipase C activity (GO:0007202)	2019-01-23	0.117155	0.184966	0.0978353	0.151409	-1.25715	2.69565	EGFR
positive regulation of proteolysis involved in cellular protein catabolic process (GO:1903052)	2019-01-23	0.117155	0.184966	0.0978353	0.151409	-1.20472	2.58324	CLU
regulation of monocyte chemotaxis (GO:0090025)	2019-01-23	0.117155	0.184966	0.0978353	0.151409	-1.12319	2.4084	HMGB1
regulation of protein secretion (GO:0050708)	2/108	0.115658	0.184966	0.0804604	0.140301	-0.616134	1.32907	TGFB1;BMP6
neutrophil degranulation (GO:0043312)	5/480	0.118478	0.18682	0.0560506	0.125354	-0.700558	1.49431	CD47;HMGB1;OLFM4;CD44;VCL
mitotic cell cycle phase transition (GO:0044772)	3/222	0.118801	0.187093	0.0716764	0.134946	-0.590523	1.25799	RANBP3;UBE2C;MYC
Wnt signaling pathway (GO:0016055)	2/110	0.119193	0.18724	0.082982	0.141931	-0.75358	1.60287	MYC;DVL1
positive regulation of cysteine-type endopeptidase activity involved in apoptotic process (GO:0043280)	2/110	0.119193	0.18724	0.082982	0.141931	-0.743083	1.58054	MYC;HMGB1
metanephros development (GO:0001656)	2019-01-24	0.121928	0.189161	0.101701	0.155469	-1.48313	3.12099	BMP4
apoptotic nuclear changes (GO:0030262)	2019-01-24	0.121928	0.189161	0.101701	0.155469	-1.4589	3.07001	HMGB1
lamellipodium assembly (GO:0030032)	2019-01-24	0.121928	0.189161	0.101701	0.155469	-1.27674	2.68669	VCL
positive regulation of protein oligomerization (GO:0032461)	2019-01-24	0.121928	0.189161	0.101701	0.155469	-1.229	2.58623	CLU
positive regulation of cell junction assembly (GO:1901890)	2019-01-24	0.121928	0.189161	0.101701	0.155469	-1.17123	2.46464	LIMS1
positive regulation of ERBB signaling pathway (GO:1901186)	2019-01-24	0.121928	0.189161	0.101701	0.155469	-1.16811	2.45808	AGR2
cellular response to amyloid-beta (GO:1904646)	2019-01-24	0.121928	0.189161	0.101701	0.155469	-1.14247	2.40414	APP
regulation of monooxygenase activity (GO:0032768)	2019-01-24	0.121928	0.189161	0.101701	0.155469	-1.04134	2.19132	EGFR
response to alkaloid (GO:0043279)	2019-01-24	0.121928	0.189161	0.101701	0.155469	-1.01554	2.13704	CHRNB1
neutrophil activation involved in immune response (GO:0002283)	5/484	0.121528	0.189161	0.0576693	0.125354	-0.577713	1.2176	CD47;HMGB1;OLFM4;CD44;VCL
cellular protein metabolic process (GO:0044267)	5/485	0.122296	0.189498	0.0580782	0.125354	-0.5081	1.06768	DLL4;BMP4;APP;AKT2;TIMP1
neuromuscular synaptic transmission (GO:0007274)	2019-01-25	0.126675	0.192239	0.105549	0.158261	-1.84493	3.81186	CHRNB1
receptor catabolic process (GO:0032801)	2019-01-25	0.126675	0.192239	0.105549	0.158261	-1.48329	3.06467	TGFB1
DNA geometric change (GO:0032392)	2019-01-25	0.126675	0.192239	0.105549	0.158261	-1.39728	2.88697	HMGB1
positive regulation of vascular endothelial growth factor production (GO:0010575)	2019-01-25	0.126675	0.192239	0.105549	0.158261	-1.38585	2.86335	TGFB1
regulation of neuronal synaptic plasticity (GO:0048168)	2019-01-25	0.126675	0.192239	0.105549	0.158261	-1.35077	2.79087	APP
regulation of epidermal growth factor-activated receptor activity (GO:0007176)	2019-01-25	0.126675	0.192239	0.105549	0.158261	-1.34843	2.78603	APP
negative regulation of protein localization to membrane (GO:1905476)	2019-01-25	0.126675	0.192239	0.105549	0.158261	-1.28684	2.65879	TGFB1
ear morphogenesis (GO:0042471)	2019-01-25	0.126675	0.192239	0.105549	0.158261	-1.27629	2.63698	TWIST1
regulation of actin filament bundle assembly (GO:0032231)	2019-01-25	0.126675	0.192239	0.105549	0.158261	-1.27537	2.63509	VIL1
receptor clustering (GO:0043113)	2019-01-25	0.126675	0.192239	0.105549	0.158261	-1.2375	2.55684	DVL1
positive regulation of microtubule polymerization or depolymerization (GO:0031112)	2019-01-25	0.126675	0.192239	0.105549	0.158261	-1.21883	2.51827	MET
positive regulation of microtubule polymerization (GO:0031116)	2019-01-25	0.126675	0.192239	0.105549	0.158261	-1.16953	2.4164	MET
regulation of chromosome organization (GO:0033044)	2019-01-25	0.126675	0.192239	0.105549	0.158261	-1.16318	2.40328	MYC
regulation of cellular senescence (GO:2000772)	2019-01-25	0.126675	0.192239	0.105549	0.158261	-1.15158	2.37932	TWIST1
cAMP metabolic process (GO:0046058)	2019-01-25	0.126675	0.192239	0.105549	0.158261	-1.13162	2.33808	EPHA2
positive regulation of dephosphorylation (GO:0035306)	2019-01-25	0.126675	0.192239	0.105549	0.158261	-1.11421	2.3021	TGFB1
neutrophil mediated immunity (GO:0002446)	5/488	0.124614	0.192239	0.0593151	0.127162	-0.677103	1.41009	CD47;HMGB1;OLFM4;CD44;VCL
regulation of lamellipodium assembly (GO:0010591)	2019-01-26	0.131397	0.194685	0.109382	0.159798	-1.60505	3.2575	EPHA2
regulation of interleukin-10 production (GO:0032653)	2019-01-26	0.131397	0.194685	0.109382	0.159798	-1.43572	2.91384	HMGB1
positive regulation of glucose transport (GO:0010828)	2019-01-26	0.131397	0.194685	0.109382	0.159798	-1.39043	2.82192	AKT2
cellular response to vascular endothelial growth factor stimulus (GO:0035924)	2019-01-26	0.131397	0.194685	0.109382	0.159798	-1.34929	2.73844	DLL4
cyclic nucleotide metabolic process (GO:0009187)	2019-01-26	0.131397	0.194685	0.109382	0.159798	-1.34811	2.73604	EPHA2
regulation of glucose metabolic process (GO:0010906)	2019-01-26	0.131397	0.194685	0.109382	0.159798	-1.34765	2.7351	AKT2
modulation of excitatory postsynaptic potential (GO:0098815)	2019-01-26	0.131397	0.194685	0.109382	0.159798	-1.29175	2.62164	APP
positive regulation of interleukin-12 production (GO:0032735)	2019-01-26	0.131397	0.194685	0.109382	0.159798	-1.284	2.60592	HMGB1
lamellipodium organization (GO:0097581)	2019-01-26	0.131397	0.194685	0.109382	0.159798	-1.28257	2.60303	VCL
regulation of protein ubiquitination involved in ubiquitin-dependent protein catabolic process (GO:2000058)	2019-01-26	0.131397	0.194685	0.109382	0.159798	-1.27792	2.59359	CLU
response to alcohol (GO:0097305)	2019-01-26	0.131397	0.194685	0.109382	0.159798	-1.27741	2.59254	TGFB1
response to amyloid-beta (GO:1904645)	2019-01-26	0.131397	0.194685	0.109382	0.159798	-1.23766	2.51188	APP
negative regulation of gene expression, epigenetic (GO:0045814)	2019-01-26	0.131397	0.194685	0.109382	0.159798	-1.23382	2.50408	BMI1
protein import into nucleus, translocation (GO:0000060)	2019-01-26	0.131397	0.194685	0.109382	0.159798	-1.15775	2.3497	TGFB1
regulation of cellular protein localization (GO:1903827)	2019-01-26	0.131397	0.194685	0.109382	0.159798	-1.15428	2.34264	DVL1
regulation of telomere maintenance (GO:0032204)	2019-01-26	0.131397	0.194685	0.109382	0.159798	-1.11985	2.27278	MYC
protein depolymerization (GO:0051261)	2019-01-26	0.131397	0.194685	0.109382	0.159798	-1.08191	2.19577	VIL1
positive regulation of nitric oxide metabolic process (GO:1904407)	2019-01-26	0.131397	0.194685	0.109382	0.159798	-1.08104	2.194	CLU
positive regulation of nitric oxide biosynthetic process (GO:0045429)	2019-01-26	0.131397	0.194685	0.109382	0.159798	-1.06093	2.1532	CLU
peptidyl-lysine modification (GO:0018205)	2/116	0.129957	0.194685	0.0906901	0.146698	-0.684235	1.39622	LOXL3;BIRC5
chromatin remodeling (GO:0006338)	2/117	0.131773	0.194781	0.0919949	0.148425	-0.816158	1.65409	MYC;HMGB1
positive regulation of peptidyl-tyrosine phosphorylation (GO:0050731)	2/117	0.131773	0.194781	0.0919949	0.148425	-0.746013	1.51193	TGFB1;CD44
regulation of pri-miRNA transcription from RNA polymerase II promoter (GO:1902893)	2019-01-27	0.136093	0.19882	0.113199	0.163655	-1.41599	2.82406	TGFB1
regulation of NF-kappaB import into nucleus (GO:0042345)	2019-01-27	0.136093	0.19882	0.113199	0.163655	-1.34298	2.67845	APP
apoptotic cell clearance (GO:0043277)	2019-01-27	0.136093	0.19882	0.113199	0.163655	-1.2841	2.56103	HMGB1
response to gamma radiation (GO:0010332)	2019-01-27	0.136093	0.19882	0.113199	0.163655	-1.25963	2.51223	MYC
regulation of microtubule-based process (GO:0032886)	2019-01-27	0.136093	0.19882	0.113199	0.163655	-1.25136	2.49573	ERBB2
positive regulation of glucose import (GO:0046326)	2019-01-27	0.136093	0.19882	0.113199	0.163655	-1.18547	2.36432	AKT2
response to ketone (GO:1901654)	2019-01-27	0.136093	0.19882	0.113199	0.163655	-1.18369	2.36078	TGFB1
cation transmembrane transport (GO:0098655)	2019-01-27	0.136093	0.19882	0.113199	0.163655	-1.10224	2.19832	CHRNB1
negative regulation of catalytic activity (GO:0043086)	2019-01-27	0.136093	0.19882	0.113199	0.163655	-1.07245	2.1389	TIMP1
plasma membrane bounded cell projection organization (GO:0120036)	2/119	0.135422	0.19882	0.0946212	0.149767	-0.616016	1.23164	APP;HMGB1
positive regulation of nucleic acid-templated transcription (GO:1903508)	5/503	0.136508	0.199194	0.0657269	0.131378	-0.392423	0.781459	BMP4;TGFB1;MYC;DVL1;EGFR
actin filament organization (GO:0007015)	2/121	0.139093	0.202729	0.0972691	0.151409	-0.676888	1.33524	PLS3;CAP2
purine ribonucleoside triphosphate biosynthetic process (GO:0009206)	2019-01-28	0.140765	0.203507	0.116999	0.167218	-2.25263	4.41666	TGFB1
negative regulation of osteoblast differentiation (GO:0045668)	2019-01-28	0.140765	0.203507	0.116999	0.167218	-1.20584	2.36425	TWIST1
negative regulation of myeloid leukocyte differentiation (GO:0002762)	2019-01-28	0.140765	0.203507	0.116999	0.167218	-1.17693	2.30757	MYC
mRNA polyadenylation (GO:0006378)	2019-01-28	0.140765	0.203507	0.116999	0.167218	-1.13732	2.2299	APP
cardiac muscle cell development (GO:0055013)	2019-01-28	0.140765	0.203507	0.116999	0.167218	-1.12127	2.19844	PDGFRA
muscle fiber development (GO:0048747)	2019-01-28	0.140765	0.203507	0.116999	0.167218	-1.01936	1.99863	CHRNB1
regulation of vascular endothelial growth factor production (GO:0010574)	2019-01-28	0.140765	0.203507	0.116999	0.167218	-1.01462	1.98933	TGFB1
negative regulation of cell migration (GO:0030336)	2/122	0.140937	0.203522	0.0986011	0.152406	-0.515366	1.00983	TIMP1;VCL
synaptic transmission, cholinergic (GO:0007271)	2019-01-29	0.145411	0.2083	0.120784	0.171065	-1.36218	2.62655	CHRNB1
RNA polyadenylation (GO:0043631)	2019-01-29	0.145411	0.2083	0.120784	0.171065	-1.17207	2.25998	APP
regulation of adenylate cyclase activity (GO:0045761)	2019-01-29	0.145411	0.2083	0.120784	0.171065	-1.09714	2.1155	CAP2
protein K11-linked ubiquitination (GO:0070979)	2019-01-29	0.145411	0.2083	0.120784	0.171065	-1.07252	2.06803	UBE2C
protein export from nucleus (GO:0006611)	2019-01-29	0.145411	0.2083	0.120784	0.171065	-1.04309	2.01127	TGFB1
bicellular tight junction assembly (GO:0070830)	2019-01-29	0.145411	0.2083	0.120784	0.171065	-1.03567	1.99696	ECT2
primary neural tube formation (GO:0014020)	2019-01-29	0.145411	0.2083	0.120784	0.171065	-1.02123	1.96913	TGFB1
positive regulation of transcription from RNA polymerase II promoter in response to stress (GO:0036003)	2019-01-30	0.150033	0.21273	0.124552	0.174422	-1.31866	2.50137	MUC1
dicarboxylic acid transport (GO:0006835)	2019-01-30	0.150033	0.21273	0.124552	0.174422	-1.28547	2.43841	SLC26A3
positive regulation of interleukin-1 secretion (GO:0050716)	2019-01-30	0.150033	0.21273	0.124552	0.174422	-1.26403	2.39774	HMGB1
regulation of chromosome segregation (GO:0051983)	2019-01-30	0.150033	0.21273	0.124552	0.174422	-1.23692	2.34631	ECT2
tube closure (GO:0060606)	2019-01-30	0.150033	0.21273	0.124552	0.174422	-1.20841	2.29224	TGFB1
cellular response to cadmium ion (GO:0071276)	2019-01-30	0.150033	0.21273	0.124552	0.174422	-1.08537	2.05884	EGFR
semaphorin-plexin signaling pathway (GO:0071526)	2019-01-30	0.150033	0.21273	0.124552	0.174422	-1.02274	1.94004	MET
positive regulation of epidermal growth factor receptor signaling pathway (GO:0045742)	2019-01-30	0.150033	0.21273	0.124552	0.174422	-0.924991	1.75462	AGR2
regulation of activated T cell proliferation (GO:0046006)	2019-01-30	0.150033	0.21273	0.124552	0.174422	-0.740914	1.40544	HMGB1
negative regulation of endothelial cell proliferation (GO:0001937)	2019-01-31	0.154629	0.214868	0.128305	0.176331	-1.2682	2.36738	DLL4
regulation of cell migration involved in sprouting angiogenesis (GO:0090049)	2019-01-31	0.154629	0.214868	0.128305	0.176331	-1.11166	2.07515	DLL4
positive regulation of cyclin-dependent protein serine/threonine kinase activity (GO:0045737)	2019-01-31	0.154629	0.214868	0.128305	0.176331	-1.0753	2.00728	EGFR
connective tissue development (GO:0061448)	2019-01-31	0.154629	0.214868	0.128305	0.176331	-1.05703	1.97319	CD44
regulation of actin cytoskeleton reorganization (GO:2000249)	2019-01-31	0.154629	0.214868	0.128305	0.176331	-1.03943	1.94033	PDGFRA
cellular response to cAMP (GO:0071320)	2019-01-31	0.154629	0.214868	0.128305	0.176331	-1.0272	1.91751	SLC26A3
beta-catenin-TCF complex assembly (GO:1904837)	2019-01-31	0.154629	0.214868	0.128305	0.176331	-1.02333	1.91027	MYC
cellular response to drug (GO:0035690)	2019-01-31	0.154629	0.214868	0.128305	0.176331	-1.0054	1.8768	MYC
negative regulation of stress-activated MAPK cascade (GO:0032873)	2019-01-31	0.154629	0.214868	0.128305	0.176331	-0.971986	1.81443	MYC
positive regulation of reactive oxygen species biosynthetic process (GO:1903428)	2019-01-31	0.154629	0.214868	0.128305	0.176331	-0.93193	1.73966	CLU
smoothened signaling pathway (GO:0007224)	2019-01-31	0.154629	0.214868	0.128305	0.176331	-0.926337	1.72922	BMP4
acylglycerol catabolic process (GO:0046464)	2019-01-31	0.154629	0.214868	0.128305	0.176331	-0.901542	1.68293	FABP1
artery morphogenesis (GO:0048844)	2019-01-31	0.154629	0.214868	0.128305	0.176331	-0.862329	1.60973	BMP4
phosphatidylinositol 3-kinase signaling (GO:0014065)	2019-01-31	0.154629	0.214868	0.128305	0.176331	-0.859192	1.60388	ERBB2
positive regulation of NF-kappaB transcription factor activity (GO:0051092)	2/129	0.153988	0.214868	0.108067	0.159798	-0.72045	1.34788	APP;CLU
protein lipidation (GO:0006497)	2/128	0.152109	0.214868	0.1067	0.159604	-0.65749	1.23816	CEACAM7;CEACAM5
non-canonical Wnt signaling pathway (GO:0035567)	2/128	0.152109	0.214868	0.1067	0.159604	-0.583901	1.09958	TIAM1;DVL1
regulation of transcription, DNA-templated (GO:0006355)	12/1599	0.15358	0.214868	0.0383101	0.117848	-0.252252	0.472603	BMP4;TGFB1;MYC;DVL1;TBX20;ERBB2;LOXL3;BIRC5;TWIST1;HMGB1;EGFR;LIMS1
inflammatory response (GO:0006954)	3/253	0.157008	0.217932	0.0965526	0.151409	-0.485324	0.898557	TGFB1;LOXL3;HMGB1
response to cadmium ion (GO:0046686)	1932-01-01	0.159201	0.219515	0.132042	0.179496	-1.12106	2.06004	EGFR
regulation of protein tyrosine kinase activity (GO:0061097)	1932-01-01	0.159201	0.219515	0.132042	0.179496	-1.01332	1.86207	APP
regulation of ubiquitin-protein transferase activity (GO:0051438)	1932-01-01	0.159201	0.219515	0.132042	0.179496	-1.00384	1.84464	BMI1
liver development (GO:0001889)	1932-01-01	0.159201	0.219515	0.132042	0.179496	-0.989587	1.81845	MET
regulation of glucose import (GO:0046324)	1932-01-01	0.159201	0.219515	0.132042	0.179496	-0.932941	1.71436	AKT2
positive regulation of protein dephosphorylation (GO:0035307)	1932-01-01	0.159201	0.219515	0.132042	0.179496	-0.860706	1.58162	TGFB1
ATP biosynthetic process (GO:0006754)	1933-01-01	0.163749	0.223083	0.135763	0.182376	-1.8685	3.3809	TGFB1
endodermal cell differentiation (GO:0035987)	1933-01-01	0.163749	0.223083	0.135763	0.182376	-1.20693	2.18384	ITGB5
activation of adenylate cyclase activity (GO:0007190)	1933-01-01	0.163749	0.223083	0.135763	0.182376	-1.18666	2.14717	CAP2
negative regulation of fat cell differentiation (GO:0045599)	1933-01-01	0.163749	0.223083	0.135763	0.182376	-1.17568	2.12731	TGFB1
positive regulation of transcription factor import into nucleus (GO:0042993)	1933-01-01	0.163749	0.223083	0.135763	0.182376	-1.0731	1.94168	APP
dendrite morphogenesis (GO:0048813)	1933-01-01	0.163749	0.223083	0.135763	0.182376	-1.05027	1.90037	DVL1
vasculogenesis (GO:0001570)	1933-01-01	0.163749	0.223083	0.135763	0.182376	-0.908577	1.644	TGFB1
regulation of glutamate receptor signaling pathway (GO:1900449)	1933-01-01	0.163749	0.223083	0.135763	0.182376	-0.855234	1.54748	APP
regulation of nitric oxide biosynthetic process (GO:0045428)	1933-01-01	0.163749	0.223083	0.135763	0.182376	-0.744962	1.34795	CLU
positive regulation of cytosolic calcium ion concentration (GO:0007204)	2/134	0.163449	0.223083	0.114973	0.165837	-0.569149	1.03087	PDGFRA;HMGB1
cellular response to organic substance (GO:0071310)	2/134	0.163449	0.223083	0.114973	0.165837	-0.566498	1.02607	TGFB1;ERBB2
positive regulation of Notch signaling pathway (GO:0045747)	1934-01-01	0.168272	0.226534	0.139468	0.184972	-1.21918	2.17278	DLL4
positive regulation of adenylate cyclase activity (GO:0045762)	1934-01-01	0.168272	0.226534	0.139468	0.184972	-1.11493	1.98699	CAP2
negative regulation of mitochondrion organization (GO:0010823)	1934-01-01	0.168272	0.226534	0.139468	0.184972	-1.05618	1.88229	CLU
positive regulation of cell-matrix adhesion (GO:0001954)	1934-01-01	0.168272	0.226534	0.139468	0.184972	-1.02743	1.83106	LIMS1
entry into host cell (GO:0030260)	1934-01-01	0.168272	0.226534	0.139468	0.184972	-0.986034	1.75728	MET
activation of MAPKK activity (GO:0000186)	1934-01-01	0.168272	0.226534	0.139468	0.184972	-0.969901	1.72853	BMP4
regulation of interleukin-12 production (GO:0032655)	1934-01-01	0.168272	0.226534	0.139468	0.184972	-0.938311	1.67223	HMGB1
negative regulation of multi-organism process (GO:0043901)	1934-01-01	0.168272	0.226534	0.139468	0.184972	-0.853588	1.52124	TIMP1
stem cell differentiation (GO:0048863)	1934-01-01	0.168272	0.226534	0.139468	0.184972	-0.850682	1.51606	EPCAM
positive regulation of organelle organization (GO:0010638)	1934-01-01	0.168272	0.226534	0.139468	0.184972	-0.846163	1.50801	AKT2
regulation of neurotransmitter receptor activity (GO:0099601)	1934-01-01	0.168272	0.226534	0.139468	0.184972	-0.743099	1.32433	APP
regulation of cytosolic calcium ion concentration (GO:0051480)	2/138	0.171092	0.230083	0.120578	0.171065	-0.548182	0.967844	PDGFRA;HMGB1
regulation of wound healing (GO:0061041)	1935-01-01	0.172771	0.230361	0.143158	0.188073	-1.18497	2.08055	VIL1
apoptotic mitochondrial changes (GO:0008637)	1935-01-01	0.172771	0.230361	0.143158	0.188073	-1.14894	2.0173	CLU
positive regulation of cytokinesis (GO:0032467)	1935-01-01	0.172771	0.230361	0.143158	0.188073	-1.1127	1.95367	ECT2
embryonic limb morphogenesis (GO:0030326)	1935-01-01	0.172771	0.230361	0.143158	0.188073	-0.912232	1.60169	TWIST1
positive regulation of cell development (GO:0010720)	1935-01-01	0.172771	0.230361	0.143158	0.188073	-0.899712	1.5797	BMP4
regulation of double-strand break repair (GO:2000779)	1935-01-01	0.172771	0.230361	0.143158	0.188073	-0.872488	1.5319	TWIST1
positive regulation of chemokine production (GO:0032722)	1935-01-01	0.172771	0.230361	0.143158	0.188073	-0.778485	1.36685	TWIST1
macromolecule catabolic process (GO:0009057)	1935-01-01	0.172771	0.230361	0.143158	0.188073	-0.733585	1.28802	TGFB1
cellular protein modification process (GO:0006464)	8/1002	0.174111	0.231902	0.0649404	0.131378	-0.370532	0.647713	BMP4;APP;TGFB1;AKT2;ERBB2;BIRC5;TIMP1;DCLK1
regulation of primary metabolic process (GO:0080090)	2/140	0.174936	0.232753	0.123406	0.174422	-0.561911	0.979598	FABP1;UGT1A9
regulation of mitochondrial membrane potential (GO:0051881)	1936-01-01	0.177246	0.233592	0.146832	0.191493	-1.25625	2.17358	AKT2
negative regulation of epithelial cell migration (GO:0010633)	1936-01-01	0.177246	0.233592	0.146832	0.191493	-0.993067	1.71822	DLL4
negative regulation of protein kinase B signaling (GO:0051898)	1936-01-01	0.177246	0.233592	0.146832	0.191493	-0.968806	1.67624	EPHA2
positive regulation of telomerase activity (GO:0051973)	1936-01-01	0.177246	0.233592	0.146832	0.191493	-0.803157	1.38964	MYC
regulation of microtubule polymerization (GO:0031113)	1936-01-01	0.177246	0.233592	0.146832	0.191493	-0.797642	1.38009	MET
membrane protein proteolysis (GO:0033619)	1936-01-01	0.177246	0.233592	0.146832	0.191493	-0.762744	1.31971	TGFB1
actin filament bundle organization (GO:0061572)	1936-01-01	0.177246	0.233592	0.146832	0.191493	-0.675433	1.16865	PLS3
positive regulation of Wnt signaling pathway (GO:0030177)	2/141	0.176864	0.233592	0.124826	0.174422	-0.548286	0.949837	DVL1;LGR5
regulation of small GTPase mediated signal transduction (GO:0051056)	2/141	0.176864	0.233592	0.124826	0.174422	-0.536203	0.928906	TIAM1;ECT2
modification-dependent protein catabolic process (GO:0019941)	2/142	0.178794	0.235384	0.12625	0.176216	-0.687696	1.18388	RANBP3;UBE2C
heart looping (GO:0001947)	1937-01-01	0.181697	0.236963	0.15049	0.194442	-1.21737	2.07612	TBX20
regulation of ubiquitin protein ligase activity (GO:1904666)	1937-01-01	0.181697	0.236963	0.15049	0.194442	-1.15131	1.96346	UBE2C
epithelial cell migration (GO:0010631)	1937-01-01	0.181697	0.236963	0.15049	0.194442	-1.0673	1.82019	ZEB2
regulation of nitric-oxide synthase activity (GO:0050999)	1937-01-01	0.181697	0.236963	0.15049	0.194442	-1.00892	1.72062	EGFR
regulation of receptor-mediated endocytosis (GO:0048259)	1937-01-01	0.181697	0.236963	0.15049	0.194442	-0.982726	1.67596	CLU
negative regulation of blood coagulation (GO:0030195)	1937-01-01	0.181697	0.236963	0.15049	0.194442	-0.917065	1.56398	PDGFRA
regulation of response to DNA damage stimulus (GO:2001020)	1937-01-01	0.181697	0.236963	0.15049	0.194442	-0.886995	1.5127	MYC
cardiac muscle tissue development (GO:0048738)	1937-01-01	0.181697	0.236963	0.15049	0.194442	-0.727473	1.24064	TBX20
glutamate receptor signaling pathway (GO:0007215)	1937-01-01	0.181697	0.236963	0.15049	0.194442	-0.695057	1.18536	APP
positive regulation of smooth muscle cell proliferation (GO:0048661)	1938-01-01	0.186124	0.240253	0.154134	0.197518	-1.10371	1.85572	BMP4
negative regulation of G0 to G1 transition (GO:0070317)	1938-01-01	0.186124	0.240253	0.154134	0.197518	-1.01181	1.70119	BMI1
regulation of DNA repair (GO:0006282)	1938-01-01	0.186124	0.240253	0.154134	0.197518	-1.01112	1.70004	EGFR
positive regulation of multi-organism process (GO:0043902)	1938-01-01	0.186124	0.240253	0.154134	0.197518	-0.767568	1.29055	BMP6
negative regulation of Ras protein signal transduction (GO:0046580)	1938-01-01	0.186124	0.240253	0.154134	0.197518	-0.753	1.26605	MET
actin filament bundle assembly (GO:0051017)	1938-01-01	0.186124	0.240253	0.154134	0.197518	-0.677593	1.13927	PLS3
response to steroid hormone (GO:0048545)	1938-01-01	0.186124	0.240253	0.154134	0.197518	-0.616543	1.03662	TGFB1
neuron development (GO:0048666)	2/145	0.184606	0.240253	0.130546	0.178823	-0.543965	0.919045	APP;HMGB1
cellular protein complex assembly (GO:0043623)	2/145	0.184606	0.240253	0.130546	0.178823	-0.514828	0.869817	TGFB1;CLU
cellular response to oxygen-containing compound (GO:1901701)	3/275	0.186139	0.240253	0.116068	0.167218	-0.491659	0.826608	PDGFRA;SLC26A3;EGFR
peptidyl-serine phosphorylation (GO:0018105)	2/146	0.18655	0.240536	0.131986	0.179496	-0.445885	0.748667	AKT2;DCLK1
positive regulation of neuron death (GO:1901216)	1939-01-01	0.190527	0.244406	0.157761	0.201138	-1.06044	1.75817	CLU
regulation of cellular amide metabolic process (GO:0034248)	1939-01-01	0.190527	0.244406	0.157761	0.201138	-1.01691	1.686	APP
T cell differentiation (GO:0030217)	1939-01-01	0.190527	0.244406	0.157761	0.201138	-0.932761	1.54648	DLL4
regulation of cellular pH (GO:0030641)	1939-01-01	0.190527	0.244406	0.157761	0.201138	-0.80996	1.34288	SLC26A3
regulation of protein kinase activity (GO:0045859)	2/148	0.190445	0.244406	0.134876	0.182376	-0.556153	0.922319	DVL1;ECT2
purine ribonucleoside monophosphate biosynthetic process (GO:0009168)	1940-01-01	0.194907	0.248496	0.161374	0.204494	-1.4712	2.40576	TGFB1
inositol lipid-mediated signaling (GO:0048017)	1940-01-01	0.194907	0.248496	0.161374	0.204494	-1.01738	1.66366	PDGFRA
positive regulation of reactive oxygen species metabolic process (GO:2000379)	1940-01-01	0.194907	0.248496	0.161374	0.204494	-0.959313	1.5687	TGFB1
regulation of G0 to G1 transition (GO:0070316)	1940-01-01	0.194907	0.248496	0.161374	0.204494	-0.945804	1.54661	BMI1
regulation of plasma membrane bounded cell projection assembly (GO:0120032)	1940-01-01	0.194907	0.248496	0.161374	0.204494	-0.820414	1.34157	EPHA2
heart development (GO:0007507)	2/150	0.194352	0.248496	0.137781	0.18489	-0.353547	0.579141	BMP4;TGFB1
positive regulation of mitotic cell cycle phase transition (GO:1901992)	1941-01-01	0.199263	0.251743	0.164971	0.207165	-1.17636	1.89761	UBE2C
regulation of release of cytochrome c from mitochondria (GO:0090199)	1941-01-01	0.199263	0.251743	0.164971	0.207165	-1.04331	1.68299	CLU
embryonic heart tube morphogenesis (GO:0003143)	1941-01-01	0.199263	0.251743	0.164971	0.207165	-0.951873	1.53549	TBX20
negative regulation of epidermal growth factor receptor signaling pathway (GO:0042059)	1941-01-01	0.199263	0.251743	0.164971	0.207165	-0.946889	1.52745	EGFR
response to cAMP (GO:0051591)	1941-01-01	0.199263	0.251743	0.164971	0.207165	-0.943814	1.52249	SLC26A3
negative regulation of catabolic process (GO:0009895)	1941-01-01	0.199263	0.251743	0.164971	0.207165	-0.90801	1.46474	EGFR
regulation of cellular localization (GO:0060341)	1941-01-01	0.199263	0.251743	0.164971	0.207165	-0.853224	1.37636	DVL1
determination of heart left/right asymmetry (GO:0061371)	1941-01-01	0.199263	0.251743	0.164971	0.207165	-0.849209	1.36988	TBX20
regulation of protein dephosphorylation (GO:0035304)	1941-01-01	0.199263	0.251743	0.164971	0.207165	-0.680568	1.09784	TGFB1
protein stabilization (GO:0050821)	2/153	0.200232	0.252712	0.142165	0.188073	-0.479759	0.771587	DVL1;CLU
cellular response to peptide (GO:1901653)	1942-01-01	0.203596	0.255413	0.168553	0.210398	-1.0068	1.60244	APP
bicarbonate transport (GO:0015701)	1942-01-01	0.203596	0.255413	0.168553	0.210398	-0.903123	1.43743	SLC26A3
positive regulation of cell division (GO:0051781)	1942-01-01	0.203596	0.255413	0.168553	0.210398	-0.794328	1.26427	ECT2
positive regulation of receptor-mediated endocytosis (GO:0048260)	1942-01-01	0.203596	0.255413	0.168553	0.210398	-0.788907	1.25564	CLU
negative regulation of proteolysis (GO:0045861)	1942-01-01	0.203596	0.255413	0.168553	0.210398	-0.672018	1.0696	TIMP1
regulation of protein localization (GO:0032880)	1942-01-01	0.203596	0.255413	0.168553	0.210398	-0.664329	1.05736	DVL1
ion transport (GO:0006811)	3/290	0.20676	0.259122	0.130164	0.178691	-0.462562	0.729089	CHRNB1;AQP5;SLC26A3
cellular response to radiation (GO:0071478)	1943-01-01	0.207906	0.259519	0.17212	0.213572	-1.04869	1.64714	ECT2
cellular response to calcium ion (GO:0071277)	1943-01-01	0.207906	0.259519	0.17212	0.213572	-0.920338	1.44555	ECT2
negative regulation of protein secretion (GO:0050709)	1943-01-01	0.207906	0.259519	0.17212	0.213572	-0.804465	1.26355	FAM3D
regulation of telomerase activity (GO:0051972)	1943-01-01	0.207906	0.259519	0.17212	0.213572	-0.607824	0.954691	MYC
negative regulation of DNA metabolic process (GO:0051053)	1944-01-01	0.212192	0.26408	0.175672	0.217334	-0.941365	1.45936	TGFB1
regulation of interferon-gamma production (GO:0032649)	1944-01-01	0.212192	0.26408	0.175672	0.217334	-0.668419	1.03623	HMGB1
digestive tract development (GO:0048565)	1944-01-01	0.212192	0.26408	0.175672	0.217334	-0.60452	0.937165	AGR2
regulation of smooth muscle cell proliferation (GO:0048660)	1945-01-01	0.216456	0.266472	0.179209	0.21954	-1.01526	1.55372	BMP4
regulation of intracellular pH (GO:0051453)	1945-01-01	0.216456	0.266472	0.179209	0.21954	-1.00734	1.5416	SLC26A3
positive regulation of transport (GO:0051050)	1945-01-01	0.216456	0.266472	0.179209	0.21954	-0.952567	1.45778	AKT2
regulation of T cell activation (GO:0050863)	1945-01-01	0.216456	0.266472	0.179209	0.21954	-0.951742	1.45652	CD47
regulation of focal adhesion assembly (GO:0051893)	1945-01-01	0.216456	0.266472	0.179209	0.21954	-0.853487	1.30615	LIMS1
cholesterol transport (GO:0030301)	1945-01-01	0.216456	0.266472	0.179209	0.21954	-0.788793	1.20714	CLU
adherens junction organization (GO:0034332)	1945-01-01	0.216456	0.266472	0.179209	0.21954	-0.784027	1.19985	VCL
sprouting angiogenesis (GO:0002040)	1945-01-01	0.216456	0.266472	0.179209	0.21954	-0.778397	1.19124	BMP4
positive regulation of actin filament bundle assembly (GO:0032233)	1945-01-01	0.216456	0.266472	0.179209	0.21954	-0.635225	0.97213	VIL1
protein localization to membrane (GO:0072657)	2/161	0.216008	0.266472	0.153998	0.197518	-0.596208	0.913652	DVL1;PKP3
posttranscriptional regulation of gene expression (GO:0010608)	1945-01-01	0.216456	0.266472	0.179209	0.21954	-0.555953	0.850814	APP
negative regulation of intracellular signal transduction (GO:1902532)	2/162	0.217989	0.268097	0.15549	0.199053	-0.446404	0.680012	TWIST1;EPHA2
negative regulation of ossification (GO:0030279)	1946-01-01	0.220696	0.270894	0.182731	0.223417	-0.699204	1.05647	TWIST1
peptidyl-tyrosine autophosphorylation (GO:0038083)	1946-01-01	0.220696	0.270894	0.182731	0.223417	-0.654484	0.988904	EGFR
positive regulation of I-kappaB kinase/NF-kappaB signaling (GO:0043123)	2/164	0.221955	0.272173	0.158484	0.201854	-0.348494	0.52458	APP;ECT2
mitotic spindle assembly (GO:0090307)	1947-01-01	0.224914	0.274457	0.186238	0.226599	-0.925933	1.38152	BIRC5
cellular response to ionizing radiation (GO:0071479)	1947-01-01	0.224914	0.274457	0.186238	0.226599	-0.858774	1.28132	ECT2
protein complex disassembly (GO:0043241)	1947-01-01	0.224914	0.274457	0.186238	0.226599	-0.802573	1.19747	DVL1
regulation of DNA metabolic process (GO:0051052)	1947-01-01	0.224914	0.274457	0.186238	0.226599	-0.691999	1.03249	MYC
negative regulation of autophagy (GO:0010507)	1947-01-01	0.224914	0.274457	0.186238	0.226599	-0.462023	0.689354	MET
negative regulation of cellular biosynthetic process (GO:0031327)	1948-01-01	0.22911	0.279032	0.18973	0.230177	-0.723353	1.0659	TGFB1
myofibril assembly (GO:0030239)	1948-01-01	0.22911	0.279032	0.18973	0.230177	-0.565656	0.833525	PDGFRA
intrinsic apoptotic signaling pathway in response to DNA damage (GO:0008630)	1949-01-01	0.233282	0.282466	0.193208	0.233266	-0.95107	1.38429	EPHA2
pattern recognition receptor signaling pathway (GO:0002221)	1949-01-01	0.233282	0.282466	0.193208	0.233266	-0.891466	1.29753	HMGB1
regulation of cell cycle arrest (GO:0071156)	1949-01-01	0.233282	0.282466	0.193208	0.233266	-0.883851	1.28645	AKT2
regulation of epithelial cell migration (GO:0010632)	1949-01-01	0.233282	0.282466	0.193208	0.233266	-0.694177	1.01038	VIL1
protein K48-linked ubiquitination (GO:0070936)	1949-01-01	0.233282	0.282466	0.193208	0.233266	-0.573587	0.834859	UBE2C
nervous system development (GO:0007399)	4/456	0.232759	0.282466	0.133676	0.181521	-0.329054	0.479679	ZEB2;TGFB1;DVL1;DCLK1
peptidyl-serine modification (GO:0018209)	2/171	0.235881	0.285336	0.169048	0.210805	-0.304252	0.43947	AKT2;DCLK1
organic hydroxy compound biosynthetic process (GO:1901617)	1950-01-01	0.237433	0.286936	0.196671	0.237218	-1.02501	1.47383	PSAT1
positive regulation of protein kinase activity (GO:0045860)	2/173	0.23987	0.289602	0.172089	0.213572	-0.486801	0.694986	ECT2;CLU
heart morphogenesis (GO:0003007)	1951-01-01	0.241561	0.290802	0.200119	0.240681	-0.929447	1.3204	TBX20
receptor internalization (GO:0031623)	1951-01-01	0.241561	0.290802	0.200119	0.240681	-0.845387	1.20098	CD9
blood circulation (GO:0008015)	1951-01-01	0.241561	0.290802	0.200119	0.240681	-0.608916	0.865046	DLL4
positive regulation of developmental growth (GO:0048639)	1952-01-01	0.245667	0.295461	0.203553	0.244341	-0.525204	0.73727	AGR2
plasma membrane bounded cell projection morphogenesis (GO:0120039)	1953-01-01	0.249751	0.29951	0.206972	0.247733	-0.891752	1.23712	DCLK1
positive regulation of mitotic cell cycle (GO:0045931)	1953-01-01	0.249751	0.29951	0.206972	0.247733	-0.883311	1.22541	APP
triglyceride metabolic process (GO:0006641)	1953-01-01	0.249751	0.29951	0.206972	0.247733	-0.529237	0.734205	FABP1
embryonic organ development (GO:0048568)	1954-01-01	0.253813	0.303509	0.210377	0.251088	-0.769932	1.0557	TGFB1
positive regulation of phosphatidylinositol 3-kinase signaling (GO:0014068)	1954-01-01	0.253813	0.303509	0.210377	0.251088	-0.697694	0.956648	PDGFRA
negative regulation of cellular response to transforming growth factor beta stimulus (GO:1903845)	1954-01-01	0.253813	0.303509	0.210377	0.251088	-0.6489	0.889743	TGFB1
cell morphogenesis involved in differentiation (GO:0000904)	1955-01-01	0.257854	0.307753	0.213767	0.254649	-0.82944	1.12419	EPHA2
negative regulation of supramolecular fiber organization (GO:1902904)	1955-01-01	0.257854	0.307753	0.213767	0.254649	-0.592826	0.803495	CLU
positive regulation of DNA biosynthetic process (GO:2000573)	1956-01-01	0.261872	0.311066	0.217143	0.257446	-0.7408	0.992598	MYC
fat cell differentiation (GO:0045444)	1956-01-01	0.261872	0.311066	0.217143	0.257446	-0.605369	0.811133	AKT2
negative regulation of transforming growth factor beta receptor signaling pathway (GO:0030512)	1956-01-01	0.261872	0.311066	0.217143	0.257446	-0.588035	0.787907	TGFB1
regulation of cellular catabolic process (GO:0031329)	1956-01-01	0.261872	0.311066	0.217143	0.257446	-0.586641	0.78604	HMGB1
DNA recombination (GO:0006310)	1956-01-01	0.261872	0.311066	0.217143	0.257446	-0.513406	0.687912	HMGB1
regulation of BMP signaling pathway (GO:0030510)	1957-01-01	0.265869	0.31462	0.220505	0.2602	-0.816717	1.08195	BMP4
ATP metabolic process (GO:0046034)	1957-01-01	0.265869	0.31462	0.220505	0.2602	-0.808054	1.07047	TGFB1
chromosome organization (GO:0051276)	1957-01-01	0.265869	0.31462	0.220505	0.2602	-0.706716	0.936223	MYC
anion transport (GO:0006820)	1957-01-01	0.265869	0.31462	0.220505	0.2602	-0.641184	0.849408	SLC26A3
regulation of Rho protein signal transduction (GO:0035023)	1958-01-01	0.269845	0.318122	0.223852	0.263158	-0.707698	0.927019	MET
IRE1-mediated unfolded protein response (GO:0036498)	1958-01-01	0.269845	0.318122	0.223852	0.263158	-0.669862	0.877457	TLN1
chloride transmembrane transport (GO:1902476)	1958-01-01	0.269845	0.318122	0.223852	0.263158	-0.554386	0.726195	SLC26A3
protein homotetramerization (GO:0051289)	1958-01-01	0.269845	0.318122	0.223852	0.263158	-0.502324	0.657998	TK1
keratinocyte differentiation (GO:0030216)	1960-01-01	0.277732	0.325886	0.230505	0.269713	-0.85671	1.09753	EPHA2
regulation of protein metabolic process (GO:0051246)	1960-01-01	0.277732	0.325886	0.230505	0.269713	-0.781757	1.00151	APP
mitotic cytokinesis (GO:0000281)	1960-01-01	0.277732	0.325886	0.230505	0.269713	-0.707763	0.906713	ECT2
regulation of extrinsic apoptotic signaling pathway (GO:2001236)	1960-01-01	0.277732	0.325886	0.230505	0.269713	-0.602319	0.77163	BMP4
renal system development (GO:0072001)	1960-01-01	0.277732	0.325886	0.230505	0.269713	-0.579675	0.74262	BMP4
regulation of stress fiber assembly (GO:0051492)	1961-01-01	0.281644	0.330167	0.23381	0.273325	-0.696565	0.882625	MET
regulation of vesicle fusion (GO:0031338)	1962-01-01	0.285535	0.33348	0.237102	0.275628	-0.762241	0.955386	AKT2
positive regulation of leukocyte chemotaxis (GO:0002690)	1962-01-01	0.285535	0.33348	0.237102	0.275628	-0.723223	0.90648	HMGB1
positive regulation of T cell proliferation (GO:0042102)	1962-01-01	0.285535	0.33348	0.237102	0.275628	-0.59178	0.741731	HMGB1
negative regulation of MAP kinase activity (GO:0043407)	1962-01-01	0.285535	0.33348	0.237102	0.275628	-0.584343	0.732409	BMP4
negative regulation of intrinsic apoptotic signaling pathway (GO:2001243)	1963-01-01	0.289405	0.337056	0.240379	0.278404	-0.704028	0.872943	CLU
DNA damage response, signal transduction by p53 class mediator resulting in cell cycle arrest (GO:0006977)	1963-01-01	0.289405	0.337056	0.240379	0.278404	-0.669204	0.829764	MUC1
establishment of protein localization to organelle (GO:0072594)	1963-01-01	0.289405	0.337056	0.240379	0.278404	-0.596785	0.73997	RANBP3
intracellular protein transport (GO:0006886)	3/348	0.29027	0.33775	0.189646	0.230177	-0.257288	0.318251	TGFB1;RANBP3;AKT2
kidney development (GO:0001822)	1964-01-01	0.293255	0.339958	0.243643	0.280626	-0.619876	0.76041	BMP4
negative regulation of protein modification process (GO:0031400)	1964-01-01	0.293255	0.339958	0.243643	0.280626	-0.592243	0.726512	TGFB1
synapse assembly (GO:0007416)	1964-01-01	0.293255	0.339958	0.243643	0.280626	-0.525247	0.644328	DVL1
signal transduction involved in mitotic G1 DNA damage checkpoint (GO:0072431)	1964-01-01	0.293255	0.339958	0.243643	0.280626	-0.425213	0.521615	MUC1
positive regulation of endocytosis (GO:0045807)	1965-01-01	0.297083	0.343443	0.246893	0.283281	-0.638237	0.774655	CLU
positive regulation of protein polymerization (GO:0032273)	1965-01-01	0.297083	0.343443	0.246893	0.283281	-0.538572	0.653688	MET
inorganic anion transmembrane transport (GO:0098661)	1965-01-01	0.297083	0.343443	0.246893	0.283281	-0.52042	0.631656	SLC26A3
regulation of cell division (GO:0051302)	1966-01-01	0.300892	0.347524	0.250129	0.286515	-0.426412	0.512123	MYC
regulation of autophagy (GO:0010506)	2/204	0.301835	0.348293	0.220197	0.2602	-0.289854	0.347208	HMGB1;MET
negative regulation of epithelial cell proliferation (GO:0050680)	1967-01-01	0.304679	0.350605	0.253351	0.289412	-0.662267	0.787102	TGFB1
cellular response to light stimulus (GO:0071482)	1967-01-01	0.304679	0.350605	0.253351	0.289412	-0.598357	0.711144	MYC
purine ribonucleotide metabolic process (GO:0009150)	1967-01-01	0.304679	0.350605	0.253351	0.289412	-0.438463	0.521111	EPHA2
post-translational protein modification (GO:0043687)	3/358	0.305015	0.350669	0.200552	0.24097	-0.345946	0.410775	BMP4;APP;TIMP1
extrinsic apoptotic signaling pathway (GO:0097191)	1968-01-01	0.308447	0.352028	0.25656	0.290953	-0.680605	0.800532	TGFB1
positive regulation of synaptic transmission (GO:0050806)	1968-01-01	0.308447	0.352028	0.25656	0.290953	-0.622885	0.732642	APP
epidermal cell differentiation (GO:0009913)	1968-01-01	0.308447	0.352028	0.25656	0.290953	-0.608495	0.715716	EPHA2
negative regulation of protein serine/threonine kinase activity (GO:0071901)	1968-01-01	0.308447	0.352028	0.25656	0.290953	-0.59559	0.700537	BMP4
regulation of gene silencing by miRNA (GO:0060964)	1968-01-01	0.308447	0.352028	0.25656	0.290953	-0.584358	0.687326	TGFB1
cellular response to UV (GO:0034644)	1968-01-01	0.308447	0.352028	0.25656	0.290953	-0.576666	0.678278	MYC
negative regulation of protein binding (GO:0032091)	1968-01-01	0.308447	0.352028	0.25656	0.290953	-0.442554	0.520535	DVL1
insulin receptor signaling pathway (GO:0008286)	1968-01-01	0.308447	0.352028	0.25656	0.290953	-0.258186	0.30368	AKT2
peptidyl-threonine phosphorylation (GO:0018107)	1969-01-01	0.312194	0.35501	0.259755	0.293514	-0.602924	0.701882	DCLK1
regulation of actin filament polymerization (GO:0030833)	1969-01-01	0.312194	0.35501	0.259755	0.293514	-0.554566	0.645588	VIL1
protein sumoylation (GO:0016925)	1969-01-01	0.312194	0.35501	0.259755	0.293514	-0.494946	0.576182	BIRC5
positive regulation of T cell activation (GO:0050870)	1969-01-01	0.312194	0.35501	0.259755	0.293514	-0.316545	0.3685	CD47
positive regulation of neurogenesis (GO:0050769)	1970-01-01	0.315921	0.358923	0.262936	0.296841	-0.533381	0.614595	ECT2
interferon-gamma-mediated signaling pathway (GO:0060333)	1971-01-01	0.319628	0.362148	0.266105	0.299338	-0.682252	0.778176	CD44
cytoskeleton-dependent cytokinesis (GO:0061640)	1971-01-01	0.319628	0.362148	0.266105	0.299338	-0.502065	0.572655	ECT2
calcium-mediated signaling (GO:0019722)	1971-01-01	0.319628	0.362148	0.266105	0.299338	-0.288074	0.328577	EGFR
nuclear import (GO:0051170)	1972-01-01	0.323315	0.363693	0.269259	0.300994	-0.732604	0.827205	RANBP3
negative regulation of ubiquitin-protein ligase activity involved in mitotic cell cycle (GO:0051436)	1972-01-01	0.323315	0.363693	0.269259	0.300994	-0.649628	0.733513	UBE2C
actomyosin structure organization (GO:0031032)	1972-01-01	0.323315	0.363693	0.269259	0.300994	-0.525192	0.593009	ITGB5
regulation of cation channel activity (GO:2001257)	1972-01-01	0.323315	0.363693	0.269259	0.300994	-0.51919	0.586232	APP
response to insulin (GO:0032868)	1972-01-01	0.323315	0.363693	0.269259	0.300994	-0.414982	0.468568	AKT2
regulation of cell communication (GO:0010646)	1972-01-01	0.323315	0.363693	0.269259	0.300994	-0.404996	0.457293	BIRC5
regulation of canonical Wnt signaling pathway (GO:0060828)	2/214	0.321715	0.363693	0.235985	0.275352	-0.348258	0.394956	DVL1;LGR5
regulation of translation (GO:0006417)	2/214	0.321715	0.363693	0.235985	0.275352	-0.188948	0.214284	APP;ERBB2
positive regulation of sequence-specific DNA binding transcription factor activity (GO:0051091)	2/216	0.325676	0.36602	0.239152	0.277753	-0.437651	0.49098	APP;CLU
regulation of neuron death (GO:1901214)	1973-01-01	0.326982	0.366501	0.272401	0.303692	-0.655864	0.733157	CLU
regulation of ubiquitin-protein ligase activity involved in mitotic cell cycle (GO:0051439)	1973-01-01	0.326982	0.366501	0.272401	0.303692	-0.4873	0.544729	UBE2C
regulation of fat cell differentiation (GO:0045598)	1973-01-01	0.326982	0.366501	0.272401	0.303692	-0.415905	0.464919	TGFB1
central nervous system development (GO:0007417)	2/218	0.329631	0.368809	0.242321	0.280135	-0.457165	0.507354	LOXL3;DCLK1
protein oligomerization (GO:0051259)	2/218	0.329631	0.368809	0.242321	0.280135	-0.217243	0.241092	ECT2;OLFM4
lymphocyte differentiation (GO:0030098)	1974-01-01	0.33063	0.368938	0.275529	0.306361	-0.621412	0.687751	DLL4
regulation of protein complex assembly (GO:0043254)	1974-01-01	0.33063	0.368938	0.275529	0.306361	-0.520377	0.575931	TGFB1
chloride transport (GO:0006821)	1974-01-01	0.33063	0.368938	0.275529	0.306361	-0.247645	0.274083	SLC26A3
mRNA 3'-end processing (GO:0031124)	1975-01-01	0.334258	0.371661	0.278644	0.309001	-0.746226	0.817746	APP
mitotic spindle organization (GO:0007052)	1975-01-01	0.334258	0.371661	0.278644	0.309001	-0.56217	0.61605	BIRC5
regulation of gene expression, epigenetic (GO:0040029)	1975-01-01	0.334258	0.371661	0.278644	0.309001	-0.507613	0.556264	BMI1
ion transmembrane transport (GO:0034220)	2/220	0.33358	0.371661	0.245493	0.282497	-0.307682	0.337796	CHRNB1;AQP5
positive regulation of cytokine production (GO:0001819)	2/221	0.335552	0.372769	0.247079	0.283281	-0.281648	0.307554	TGFB1;HMGB1
retinoid metabolic process (GO:0001523)	1976-01-01	0.337866	0.373353	0.281746	0.310789	-0.699763	0.759316	UGT1A9
gland development (GO:0048732)	1976-01-01	0.337866	0.373353	0.281746	0.310789	-0.68801	0.746563	MET
negative regulation of cellular amide metabolic process (GO:0034249)	1976-01-01	0.337866	0.373353	0.281746	0.310789	-0.631416	0.685153	CLU
regulation of actin cytoskeleton organization (GO:0032956)	1976-01-01	0.337866	0.373353	0.281746	0.310789	-0.61866	0.671312	PDGFRA
antigen processing and presentation of exogenous peptide antigen via MHC class I, TAP-dependent (GO:0002479)	1976-01-01	0.337866	0.373353	0.281746	0.310789	-0.570202	0.618729	ITGB5
purine ribonucleotide biosynthetic process (GO:0009152)	1976-01-01	0.337866	0.373353	0.281746	0.310789	-0.460881	0.500104	TGFB1
positive regulation of ubiquitin-protein ligase activity involved in regulation of mitotic cell cycle transition (GO:0051437)	1977-01-01	0.341455	0.376654	0.284834	0.313643	-0.608654	0.654022	UBE2C
negative regulation of extrinsic apoptotic signaling pathway (GO:2001237)	1977-01-01	0.341455	0.376654	0.284834	0.313643	-0.541021	0.581347	BMP4
negative regulation of ubiquitin protein ligase activity (GO:1904667)	1978-01-01	0.345025	0.379255	0.28791	0.315919	-0.657159	0.699307	UBE2C
negative regulation of transmembrane receptor protein serine/threonine kinase signaling pathway (GO:0090101)	1978-01-01	0.345025	0.379255	0.28791	0.315919	-0.451562	0.480524	TGFB1
regulation of cytokinesis (GO:0032465)	1978-01-01	0.345025	0.379255	0.28791	0.315919	-0.253548	0.26981	ECT2
positive regulation of cytoskeleton organization (GO:0051495)	1978-01-01	0.345025	0.379255	0.28791	0.315919	-0.165187	0.175781	VIL1
antigen processing and presentation of exogenous peptide antigen via MHC class I (GO:0042590)	1979-01-01	0.348576	0.382487	0.290972	0.31872	-0.581757	0.613113	ITGB5
sensory perception of mechanical stimulus (GO:0050954)	1979-01-01	0.348576	0.382487	0.290972	0.31872	-0.527937	0.556392	BIRC5
regulation of endothelial cell proliferation (GO:0001936)	1980-01-01	0.352108	0.385012	0.294022	0.320938	-0.662814	0.691857	BMP4
response to calcium ion (GO:0051592)	1980-01-01	0.352108	0.385012	0.294022	0.320938	-0.60965	0.636363	ECT2
regulation of transforming growth factor beta receptor signaling pathway (GO:0017015)	1980-01-01	0.352108	0.385012	0.294022	0.320938	-0.459363	0.479491	TGFB1
cation transport (GO:0006812)	1980-01-01	0.352108	0.385012	0.294022	0.320938	-0.445298	0.46481	CHRNB1
nucleic acid metabolic process (GO:0090304)	1981-01-01	0.35562	0.387837	0.297059	0.323406	-0.714734	0.738958	TK1
spindle assembly (GO:0051225)	1981-01-01	0.35562	0.387837	0.297059	0.323406	-0.521335	0.539003	BIRC5
RNA transport (GO:0050658)	1981-01-01	0.35562	0.387837	0.297059	0.323406	-0.511595	0.528933	RANBP3
apoptotic process (GO:0006915)	2/232	0.357128	0.389142	0.264553	0.298397	-0.151066	0.155547	APP;MYC
sensory perception of sound (GO:0007605)	1982-01-01	0.359114	0.390966	0.300082	0.326415	-0.654432	0.670214	BIRC5
positive regulation of cell cycle (GO:0045787)	1983-01-01	0.362589	0.392361	0.303093	0.32798	-0.605795	0.61457	APP
modulation of chemical synaptic transmission (GO:0050804)	1983-01-01	0.362589	0.392361	0.303093	0.32798	-0.487671	0.494735	APP
DNA damage response, signal transduction by p53 class mediator (GO:0030330)	1983-01-01	0.362589	0.392361	0.303093	0.32798	-0.458539	0.465181	MUC1
positive regulation of ubiquitin protein ligase activity (GO:1904668)	1983-01-01	0.362589	0.392361	0.303093	0.32798	-0.44511	0.451557	UBE2C
activation of protein kinase activity (GO:0032147)	2/234	0.361025	0.392361	0.267733	0.300899	-0.331136	0.337364	BMP4;ECT2
positive regulation of cell cycle arrest (GO:0071158)	1983-01-01	0.362589	0.392361	0.303093	0.32798	-0.330426	0.335212	MUC1
negative regulation of binding (GO:0051100)	1983-01-01	0.362589	0.392361	0.303093	0.32798	-0.265173	0.269014	DVL1
establishment of protein localization to membrane (GO:0090150)	1984-01-01	0.366046	0.395759	0.306092	0.330939	-0.523042	0.525656	EGFR
protein modification process (GO:0036211)	1985-01-01	0.369483	0.398787	0.309077	0.33359	-0.534523	0.532198	AKT2
regulation of mitotic nuclear division (GO:0007088)	1985-01-01	0.369483	0.398787	0.309077	0.33359	-0.507547	0.505339	BMP4
toll-like receptor signaling pathway (GO:0002224)	1987-01-01	0.376304	0.405799	0.315011	0.339701	-0.362315	0.354112	HMGB1
regulation of stem cell differentiation (GO:2000736)	1989-01-01	0.383051	0.412364	0.320894	0.345451	-0.427909	0.410616	PDGFRA
T cell activation (GO:0042110)	1989-01-01	0.383051	0.412364	0.320894	0.345451	-0.370437	0.355467	DLL4
peptidyl-threonine modification (GO:0018210)	1990-01-01	0.386397	0.415609	0.323817	0.348298	-0.154088	0.14652	DCLK1
protein tetramerization (GO:0051262)	1991-01-01	0.389726	0.41883	0.326727	0.351127	-0.275781	0.259872	TK1
negative regulation of kinase activity (GO:0033673)	1992-01-01	0.393036	0.421302	0.329626	0.353331	-0.554668	0.517979	DVL1
regulation of protein catabolic process (GO:0042176)	1992-01-01	0.393036	0.421302	0.329626	0.353331	-0.410852	0.383676	EGFR
cellular response to lipopolysaccharide (GO:0071222)	1992-01-01	0.393036	0.421302	0.329626	0.353331	-0.22486	0.209986	TGFB1
positive regulation of cellular metabolic process (GO:0031325)	1993-01-01	0.396329	0.424469	0.332511	0.35612	-0.518	0.479414	TGFB1
regulation of transcription from RNA polymerase II promoter in response to stress (GO:0043618)	1994-01-01	0.399604	0.42761	0.335385	0.358891	-0.600742	0.55105	MUC1
axon development (GO:0061564)	1995-01-01	0.402861	0.430728	0.338247	0.361644	-0.55316	0.502912	APP
negative regulation of cell motility (GO:2000146)	1998-01-01	0.412529	0.439937	0.346759	0.369797	-0.498609	0.441492	VCL
cellular response to organonitrogen compound (GO:0071417)	1998-01-01	0.412529	0.439937	0.346759	0.369797	-0.465923	0.412551	SLC26A3
mRNA metabolic process (GO:0016071)	1998-01-01	0.412529	0.439937	0.346759	0.369797	-0.433618	0.383946	ELAVL4
positive regulation of neuron differentiation (GO:0045666)	1999-01-01	0.415717	0.442583	0.349572	0.372164	-0.432834	0.37992	ECT2
regulation of insulin secretion (GO:0050796)	1999-01-01	0.415717	0.442583	0.349572	0.372164	-0.402741	0.353506	FAM3D
intrinsic apoptotic signaling pathway (GO:0097193)	1/102	0.425178	0.452271	0.357941	0.380749	-0.294919	0.252228	EPHA2
positive regulation of angiogenesis (GO:0045766)	1/104	0.431402	0.458501	0.363461	0.385965	-0.499585	0.420009	TWIST1
positive regulation of vasculature development (GO:1904018)	1/105	0.434488	0.460999	0.366204	0.388219	-0.354483	0.295492	TWIST1
positive regulation of lymphocyte activation (GO:0051251)	1/105	0.434488	0.460999	0.366204	0.388219	-0.222328	0.18533	CD47
positive regulation of cellular component organization (GO:0051130)	1/107	0.440611	0.4671	0.371654	0.393664	-0.451302	0.369883	TGFB1
positive regulation of cell cycle process (GO:0090068)	1/108	0.443648	0.469525	0.374362	0.395862	-0.521058	0.423476	ECT2
regulation of response to external stimulus (GO:0032101)	1/108	0.443648	0.469525	0.374362	0.395862	-0.469084	0.381235	PDGFRA
regulation of protein activation cascade (GO:2000257)	1/109	0.446669	0.471924	0.377058	0.398041	-0.442494	0.356623	CLU
monocarboxylic acid metabolic process (GO:0032787)	1/109	0.446669	0.471924	0.377058	0.398041	-0.377881	0.304548	UGT1A9
regulation of complement activation (GO:0030449)	1/110	0.449673	0.473898	0.379743	0.399864	-0.609381	0.487038	CLU
negative regulation of protein kinase activity (GO:0006469)	1/110	0.449673	0.473898	0.379743	0.399864	-0.517316	0.413457	DVL1
circulatory system development (GO:0072359)	1/110	0.449673	0.473898	0.379743	0.399864	-0.351137	0.280641	TGFB1
negative regulation of cytokine production (GO:0001818)	1/111	0.452661	0.475846	0.382416	0.401666	-0.496331	0.393398	HMGB1
cellular response to insulin stimulus (GO:0032869)	1/111	0.452661	0.475846	0.382416	0.401666	-0.331145	0.262469	AKT2
cellular response to peptide hormone stimulus (GO:0071375)	1/111	0.452661	0.475846	0.382416	0.401666	-0.219001	0.173583	AKT2
regulation of organelle organization (GO:0033043)	1/114	0.46153	0.483949	0.390369	0.408989	-0.479212	0.370531	ZEB2
regulation of humoral immune response (GO:0002920)	1/114	0.46153	0.483949	0.390369	0.408989	-0.380177	0.293956	CLU
positive regulation of canonical Wnt signaling pathway (GO:0090263)	1/114	0.46153	0.483949	0.390369	0.408989	-0.0437932	0.0338613	LGR5
regulation of immune effector process (GO:0002697)	1/115	0.464454	0.486608	0.392998	0.411399	-0.269161	0.206418	CLU
negative regulation of cell growth (GO:0030308)	1/116	0.467363	0.489246	0.395615	0.413447	-0.509957	0.387898	TGFB1
proteasome-mediated ubiquitin-dependent protein catabolic process (GO:0043161)	2/292	0.469424	0.490993	0.359183	0.381746	-0.170762	0.129139	PTTG1;UBE2C
cellular response to interferon-gamma (GO:0071346)	1/117	0.470256	0.491453	0.398221	0.415824	0.0256771	-0.0193728	CD44
protein localization to cell periphery (GO:1990778)	1/118	0.473133	0.494048	0.400816	0.418185	-0.488668	0.365709	PKP3
RNA export from nucleus (GO:0006405)	1/120	0.478842	0.499592	0.405974	0.423213	-0.509668	0.375312	RANBP3
macromolecular complex assembly (GO:0065003)	1/121	0.481673	0.501292	0.408536	0.424823	-0.547976	0.400291	VIL1
enzyme linked receptor protein signaling pathway (GO:0007167)	1/121	0.481673	0.501292	0.408536	0.424823	-0.340162	0.248484	ERBB2
negative regulation of growth (GO:0045926)	1/121	0.481673	0.501292	0.408536	0.424823	-0.0224467	0.0163971	TGFB1
regulation of acute inflammatory response (GO:0002673)	1/122	0.484489	0.503804	0.411087	0.427121	-0.546425	0.395972	CLU
tumor necrosis factor-mediated signaling pathway (GO:0033209)	1/124	0.490076	0.509191	0.416157	0.431673	-0.547413	0.390412	LIMS1
organic anion transport (GO:0015711)	1/125	0.492847	0.511645	0.418676	0.433567	-0.416501	0.294698	SLC26A3
cytoskeleton organization (GO:0007010)	1/127	0.498343	0.516923	0.423682	0.438389	-0.45527	0.31708	TLN1
regulation of protein processing (GO:0070613)	1/129	0.503781	0.522131	0.428646	0.443158	-0.185084	0.126896	CLU
protein localization to plasma membrane (GO:0072659)	1/131	0.509161	0.527054	0.433568	0.447877	-0.469287	0.316765	PKP3
DNA metabolic process (GO:0006259)	2/315	0.509374	0.527054	0.394478	0.412604	-0.230936	0.155783	HMGB1;TK1
phagocytosis (GO:0006909)	1/136	0.522358	0.540043	0.44569	0.45964	-0.0267144	0.0173484	HMGB1
response to cytokine (GO:0034097)	1/139	0.530107	0.547602	0.45284	0.46663	-0.220051	0.139661	TIMP1
cellular protein localization (GO:0034613)	2/328	0.531082	0.548158	0.414056	0.429849	-0.276453	0.17495	EGFR;VCL
cellular response to DNA damage stimulus (GO:0006974)	2/330	0.534365	0.551091	0.417041	0.432232	-0.296991	0.186118	MYC;EPHA2
response to lipid (GO:0033993)	1/141	0.535203	0.551502	0.457556	0.470715	-0.340979	0.213149	TGFB1
ubiquitin-dependent protein catabolic process (GO:0006511)	2/342	0.553731	0.570124	0.434797	0.448777	-0.263906	0.155989	RANBP3;UBE2C
negative regulation of canonical Wnt signaling pathway (GO:0090090)	1/149	0.555048	0.571011	0.476025	0.489313	-0.395258	0.232689	DVL1
spermatogenesis (GO:0007283)	1/154	0.567022	0.58285	0.487252	0.500443	-0.305193	0.173153	PTTG1
male gamete generation (GO:0048232)	1/155	0.569378	0.584792	0.489469	0.501896	-0.392773	0.221214	PTTG1
transcription, DNA-templated (GO:0006351)	2/357	0.57714	0.592278	0.456593	0.47011	0.100666	-0.055333	PTTG1;DVL1
transmembrane transport (GO:0055085)	2/379	0.609849	0.625333	0.487696	0.500488	-0.23078	0.114131	CHRNB1;AQP5
negative regulation of Wnt signaling pathway (GO:0030178)	1/175	0.613923	0.628995	0.531878	0.54449	-0.304399	0.148512	DVL1
cellular response to lipid (GO:0071396)	1/179	0.622268	0.637023	0.539934	0.552286	-0.252047	0.119567	EGFR
phosphate-containing compound metabolic process (GO:0006796)	1/184	0.632448	0.646916	0.549813	0.561931	-0.314951	0.144297	TGFB1
regulation of mitotic cell cycle phase transition (GO:1901990)	1/185	0.634451	0.648435	0.551763	0.563465	-0.157102	0.0714806	UBE2C
protein modification by small protein conjugation (GO:0032446)	2/399	0.637905	0.651434	0.515023	0.527666	-0.135578	0.060951	UBE2C;BIRC5
receptor-mediated endocytosis (GO:0006898)	1/189	0.642357	0.655445	0.559483	0.570882	-0.459839	0.20353	CD9
protein complex assembly (GO:0006461)	1/190	0.644306	0.656899	0.561392	0.572364	0.17155	-0.0754102	MYC
RNA metabolic process (GO:0016070)	1/192	0.648174	0.660304	0.565186	0.575763	-0.0538331	0.0233418	ELAVL4
RNA processing (GO:0006396)	1/194	0.652	0.663662	0.568948	0.579124	-0.29451	0.125965	ELAVL4
cellular response to tumor necrosis factor (GO:0071356)	1/195	0.653898	0.665053	0.570817	0.580554	-0.243995	0.10365	LIMS1
regulation of I-kappaB kinase/NF-kappaB signaling (GO:0043122)	1/205	0.672319	0.683233	0.589073	0.598635	-0.277519	0.110181	ECT2
Ras protein signal transduction (GO:0007265)	1/224	0.704684	0.714963	0.621679	0.630747	-0.320195	0.11207	TIAM1
axonogenesis (GO:0007409)	1/224	0.704684	0.714963	0.621679	0.630747	0.0991152	-0.0346909	APP
endosomal transport (GO:0016197)	1/230	0.714231	0.724062	0.631436	0.63961	-0.245214	0.0825267	DCLK1
proteasomal protein catabolic process (GO:0010498)	1/238	0.726485	0.73589	0.644062	0.651872	-0.146784	0.046903	UBE2C
anterograde trans-synaptic signaling (GO:0098916)	1/241	0.730945	0.739809	0.648686	0.655492	-0.278962	0.0874314	CHRNB1
plasma membrane bounded cell projection assembly (GO:0120031)	1/242	0.732416	0.740699	0.650214	0.656507	-0.238771	0.0743549	VCL
transcription from RNA polymerase II promoter (GO:0006366)	2/486	0.741914	0.749698	0.622531	0.631101	-0.173761	0.0518716	PTTG1;DVL1
protein deubiquitination (GO:0016579)	1/258	0.754891	0.762197	0.673794	0.679767	-0.076997	0.0216501	MYC
protein modification by small protein removal (GO:0070646)	1/262	0.760211	0.76695	0.679441	0.684911	-0.310951	0.0852499	MYC
endocytosis (GO:0006897)	1/264	0.762828	0.768409	0.682228	0.687167	-0.214772	0.0581437	APP
protein ubiquitination (GO:0016567)	2/507	0.762885	0.768409	0.645632	0.652933	-0.153968	0.041671	UBE2C;BIRC5
mRNA processing (GO:0006397)	1/284	0.787491	0.791918	0.708819	0.712804	-0.18636	0.0445221	ELAVL4
protein polyubiquitination (GO:0000209)	1/284	0.787491	0.791918	0.708819	0.712804	-0.0225272	0.00538184	UBE2C
DNA repair (GO:0006281)	1/289	0.793248	0.797068	0.715117	0.71856	-0.0792996	0.0183673	HMGB1
chemical synaptic transmission (GO:0007268)	1/290	0.794381	0.797566	0.71636	0.719232	-0.167779	0.0386213	CHRNB1
protein transport (GO:0015031)	1/327	0.832239	0.834906	0.758796	0.761228	-0.243665	0.0447456	CLU
regulation of cellular macromolecule biosynthetic process (GO:2000112)	2/632	0.859647	0.861712	0.760991	0.762818	0.0776142	-0.0117378	APP;HMGB1
gene expression (GO:0010467)	1/412	0.895036	0.895751	0.834044	0.834711	-0.113793	0.0126187	ELAVL4
vesicle-mediated transport (GO:0016192)	1/411	0.894454	0.895751	0.83331	0.834643	0.109485	-0.0122122	APP
regulation of nucleic acid-templated transcription (GO:1903506)	1/608	0.964677	0.964677	0.930536	0.930536	0.334708	-0.0120367	HMGB1
Term	Overlap	P-value	Adjusted P-value	Old P-value	Old Adjusted P-value	Z-score	Combined Score	Genes

## Sheet: CTC molecular function
Term	Overlap	P-value	Adjusted P-value	Old P-value	Old Adjusted P-value	Z-score	Combined Score	Genes
transmembrane receptor protein tyrosine kinase activity (GO:0004714)	1962-05-01	2.11898e-05	0.00163977	1.59279e-05	0.00120637	-1.68448	18.1283	PDGFRA;ERBB2;MET;EGFR;EPHA2
transmembrane receptor protein kinase activity (GO:0019199)	1963-05-01	2.29182e-05	0.00163977	1.71299e-05	0.00120637	-1.39653	14.92	PDGFRA;ERBB2;MET;EGFR;EPHA2
mitogen-activated protein kinase kinase binding (GO:0031434)	1966-05-01	2.87679e-05	0.00163977	2.11644e-05	0.00120637	-1.2611	13.1863	PDGFRA;ERBB2;MET;EGFR;EPHA2
BMP receptor binding (GO:0070700)	2019-03-13	4.21052e-05	0.0018	5.52729e-05	0.00189033	-2.73011	27.5068	BMP4;TGFB1;BMP6
MAP kinase kinase kinase activity (GO:0004709)	1979-05-01	6.86239e-05	0.00234694	4.7878e-05	0.00189033	-2.21675	21.2517	PDGFRA;ERBB2;MET;EGFR;EPHA2
transmembrane receptor protein serine/threonine kinase binding (GO:0070696)	2019-03-17	9.85465e-05	0.00280858	0.000111006	0.00283223	-1.71902	15.8579	BMP4;TGFB1;BMP6
cytokine activity (GO:0005125)	6/156	0.000203288	0.00496602	0.000115939	0.00283223	-1.21616	10.3384	BMP4;TGFB1;FAM3D;HMGB1;TIMP1;BMP6
endopeptidase inhibitor activity (GO:0004866)	5/112	0.000354811	0.0075841	0.000230625	0.0049296	-1.91453	15.2089	APP;PTTG1;BIRC5;TIMP1;SERPINB5
phosphatidylinositol-4,5-bisphosphate 3-kinase activity (GO:0046934)	1969-04-01	0.000530752	0.0100843	0.000397223	0.00754723	-1.81164	13.662	PDGFRA;ERBB2;MET;EGFR
phosphatidylinositol bisphosphate kinase activity (GO:0052813)	1972-04-01	0.000623836	0.0106676	0.000463288	0.00792223	-1.19666	8.83092	PDGFRA;ERBB2;MET;EGFR
phosphatidylinositol 3-kinase activity (GO:0035004)	1977-04-01	0.00080383	0.0124959	0.000590275	0.00917609	-1.4412	10.2702	PDGFRA;ERBB2;MET;EGFR
protein tyrosine kinase activity (GO:0004713)	5/148	0.00125418	0.0178721	0.000790556	0.0103989	-1.19073	7.95559	PDGFRA;ERBB2;MET;EGFR;EPHA2
cadherin binding (GO:0045296)	7/314	0.00158567	0.0208577	0.000788454	0.0103989	-1.94764	12.556	EPCAM;PKP3;TLN1;OLFM4;EGFR;VCL;EPHA2
transforming growth factor beta receptor binding (GO:0005160)	1945-03-01	0.00184261	0.0225061	0.00153222	0.018715	-1.74378	10.9798	BMP4;TGFB1;BMP6
cysteine-type endopeptidase inhibitor activity (GO:0004869)	1952-03-01	0.00279236	0.0318329	0.00226997	0.0258776	-2.63426	15.4917	VIL1;PTTG1;BIRC5
Ran GTPase binding (GO:0008536)	2019-02-19	0.00465281	0.0497269	0.00443884	0.0474401	-2.34964	12.6182	RANBP3;BIRC5
cadherin binding involved in cell-cell adhesion (GO:0098641)	2019-02-20	0.00515165	0.0518195	0.00486783	0.0489646	-2.04797	10.7896	EPCAM;PKP3
protein binding involved in cell-cell adhesion (GO:0098632)	2019-02-22	0.00621947	0.0590849	0.00578069	0.0549166	-1.99745	10.1472	EPCAM;PKP3
actin binding (GO:0003779)	5/255	0.0124754	0.112279	0.00783532	0.0705178	-2.26629	9.93541	VIL1;PLS3;EGFR;VCL;CAP2
protein phosphatase binding (GO:0019903)	1993-03-01	0.0139834	0.119558	0.0107747	0.0877365	-1.45641	6.21871	ERBB2;MET;EGFR
E-box binding (GO:0070888)	1935-02-01	0.0153069	0.124642	0.0134075	0.0925414	-1.71174	7.15415	MYC;TWIST1
phosphatase binding (GO:0019902)	3/103	0.0183362	0.136325	0.0140706	0.0925414	-1.0973	4.38797	ERBB2;MET;EGFR
protein kinase binding (GO:0019901)	7/496	0.0180506	0.136325	0.0096104	0.082169	-1.04093	4.17889	PDGFRA;DVL1;ERBB2;MET;EGFR;EPHA2;LIMS1
transition metal ion binding (GO:0046914)	6/400	0.0214352	0.1468	0.0124941	0.0925414	-1.04971	4.03375	MMP13;LOXL3;TIMP1;TK1;BMI1;LIMS1
protein kinase activity (GO:0004672)	7/514	0.021462	0.1468	0.0115244	0.0895761	-1.01741	3.90834	PDGFRA;AKT2;ERBB2;MET;DCLK1;EGFR;EPHA2
zinc ion binding (GO:0008270)	5/303	0.0243257	0.159988	0.0154855	0.0980749	-1.03575	3.84907	MMP13;TIMP1;TK1;BMI1;LIMS1
protein homodimerization activity (GO:0042803)	8/665	0.0276428	0.175071	0.0139312	0.0925414	-1.97675	7.09335	VIL1;PDGFRA;CEACAM5;AGR2;MUC13;UGT1A9;ECT2;OLFM4
RNA polymerase I core binding (GO:0001042)	2019-01-07	0.0371986	0.185906	0.0375928	0.180376	-4.27999	14.0875	ERBB2
protein-lysine 6-oxidase activity (GO:0004720)	2019-01-07	0.0371986	0.185906	0.0375928	0.180376	-3.87285	12.7474	LOXL3
vascular endothelial growth factor-activated receptor activity (GO:0005021)	2019-01-08	0.0423996	0.185906	0.0421932	0.180376	-2.94288	9.30132	PDGFRA
GPI anchor binding (GO:0034235)	2019-01-08	0.0423996	0.185906	0.0421932	0.180376	-2.86179	9.04501	CEACAM5
type II transforming growth factor beta receptor binding (GO:0005114)	2019-01-08	0.0423996	0.185906	0.0421932	0.180376	-2.72931	8.62631	TGFB1
bubble DNA binding (GO:0000405)	2019-01-08	0.0423996	0.185906	0.0421932	0.180376	-2.29813	7.26351	HMGB1
actin filament binding (GO:0051015)	3/128	0.0321546	0.185906	0.0245736	0.150074	-1.62933	5.60035	VIL1;PLS3;EGFR
repressing transcription factor binding (GO:0070491)	1954-02-01	0.0344594	0.185906	0.0292681	0.16378	-1.64324	5.53438	MYC;HMGB1
cytokine receptor binding (GO:0005126)	3/138	0.0388507	0.185906	0.029691	0.16378	-1.70263	5.53018	BMP4;TGFB1;BMP6
serine-type endopeptidase inhibitor activity (GO:0004867)	1957-02-01	0.0380356	0.185906	0.0322249	0.172202	-1.44733	4.73167	APP;SERPINB5
collagen binding (GO:0005518)	1953-02-01	0.0332983	0.185906	0.0283082	0.16378	-1.27046	4.32242	MMP13;CD44
Rho guanyl-nucleotide exchange factor activity (GO:0005089)	1960-02-01	0.0417471	0.185906	0.0352943	0.180376	-1.32713	4.21514	TIAM1;ECT2
tau protein binding (GO:0048156)	2019-01-09	0.0475727	0.198413	0.046772	0.186	-2.79283	8.50555	CLU
type I transforming growth factor beta receptor binding (GO:0034713)	2019-01-09	0.0475727	0.198413	0.046772	0.186	-2.72277	8.2922	TGFB1
siRNA binding (GO:0035197)	2019-01-10	0.0527181	0.208471	0.0513293	0.190811	-3.19811	9.41138	FAM172A
RAGE receptor binding (GO:0050786)	2019-01-10	0.0527181	0.208471	0.0513293	0.190811	-2.8374	8.3499	HMGB1
activating transcription factor binding (GO:0033613)	1969-02-01	0.0536418	0.208471	0.0451419	0.186	-2.11588	6.18985	MYC;TBX20
vinculin binding (GO:0017166)	2019-01-11	0.057836	0.210425	0.0558653	0.194958	-2.91519	8.30871	TLN1
adenylate cyclase binding (GO:0008179)	2019-01-11	0.057836	0.210425	0.0558653	0.194958	-2.41188	6.87421	CAP2
protein heterodimerization activity (GO:0046982)	4/266	0.0561882	0.210425	0.0396838	0.180376	-1.26733	3.6487	ERBB2;UGT1A9;EGFR;BMP6
platelet-derived growth factor receptor binding (GO:0005161)	2019-01-14	0.0730258	0.21722	0.0693457	0.202746	-2.73617	7.16041	PDGFRA
platelet-derived growth factor binding (GO:0048407)	2019-01-12	0.0629265	0.21722	0.0603799	0.199284	-2.48509	6.87323	PDGFRA
oxalate transmembrane transporter activity (GO:0019531)	2019-01-12	0.0629265	0.21722	0.0603799	0.199284	-2.25149	6.22716	SLC26A3
GTPase inhibitor activity (GO:0005095)	2019-01-14	0.0730258	0.21722	0.0693457	0.202746	-2.37513	6.21558	PDE6D
metalloendopeptidase inhibitor activity (GO:0008191)	2019-01-13	0.0679897	0.21722	0.0648734	0.202746	-2.30621	6.20003	TIMP1
transaminase activity (GO:0008483)	2019-01-15	0.078035	0.21722	0.073797	0.202746	-2.37781	6.06485	PSAT1
sulfate transmembrane transporter activity (GO:0015116)	2019-01-13	0.0679897	0.21722	0.0648734	0.202746	-2.19339	5.8967	SLC26A3
water channel activity (GO:0015250)	2019-01-14	0.0730258	0.21722	0.0693457	0.202746	-2.2402	5.86248	AQP5
water transmembrane transporter activity (GO:0005372)	2019-01-14	0.0730258	0.21722	0.0693457	0.202746	-2.19956	5.75613	AQP5
Rac guanyl-nucleotide exchange factor activity (GO:0030676)	2019-01-15	0.078035	0.21722	0.073797	0.202746	-2.24341	5.72204	TIAM1
nucleoside kinase activity (GO:0019206)	2019-01-15	0.078035	0.21722	0.073797	0.202746	-2.22578	5.67707	TK1
retinoic acid binding (GO:0001972)	2019-01-15	0.078035	0.21722	0.073797	0.202746	-1.85063	4.72021	UGT1A9
ubiquitin-like protein ligase binding (GO:0044389)	4/298	0.0781059	0.21722	0.0557513	0.194958	-1.4539	3.70699	UBE2C;CLU;EGFR;VCL
Ras GTPase binding (GO:0017016)	3/185	0.0787583	0.21722	0.060601	0.199284	-1.38766	3.52657	RANBP3;PDE6D;BIRC5
ubiquitin protein ligase binding (GO:0031625)	4/285	0.0687454	0.21722	0.0488526	0.189859	-1.30729	3.50006	UBE2C;CLU;EGFR;VCL
oxidoreductase activity, acting on the CH-NH2 group of donors, oxygen as acceptor (GO:0016641)	2019-01-16	0.0830173	0.221812	0.0782275	0.202746	-2.4917	6.20111	LOXL3
acetylcholine-gated cation-selective channel activity (GO:0022848)	2019-01-16	0.0830173	0.221812	0.0782275	0.202746	-2.0679	5.14639	CHRNB1
transmembrane-ephrin receptor activity (GO:0005005)	2019-01-18	0.0929021	0.221834	0.087026	0.203855	-2.44749	5.81575	EPHA2
ephrin receptor activity (GO:0005003)	2019-01-18	0.0929021	0.221834	0.087026	0.203855	-2.43861	5.79465	EPHA2
four-way junction DNA binding (GO:0000400)	2019-01-17	0.087973	0.221834	0.0826371	0.203855	-1.98563	4.82652	HMGB1
chemokine binding (GO:0019956)	2019-01-18	0.0929021	0.221834	0.087026	0.203855	-2.01548	4.78921	HMGB1
DNA polymerase binding (GO:0070182)	2019-01-17	0.087973	0.221834	0.0826371	0.203855	-1.92372	4.67604	HMGB1
DNA binding, bending (GO:0008301)	2019-01-18	0.0929021	0.221834	0.087026	0.203855	-1.81044	4.30199	HMGB1
growth factor receptor binding (GO:0070851)	1993-02-01	0.090103	0.221834	0.0754911	0.202746	-1.61282	3.88173	PDGFRA;AGR2
integrin binding (GO:0005178)	1995-02-01	0.0934038	0.221834	0.078253	0.202746	-1.18648	2.81294	HMGB1;TLN1
ion antiporter activity (GO:0099516)	2019-01-19	0.0978049	0.226009	0.0913943	0.208379	-1.91889	4.46099	SLC26A3
hyaluronic acid binding (GO:0005540)	2019-01-19	0.0978049	0.226009	0.0913943	0.208379	-1.89588	4.4075	CD44
R-SMAD binding (GO:0070412)	2019-01-20	0.102681	0.231033	0.0957421	0.21542	-1.41342	3.21712	RANBP3
double-stranded DNA binding (GO:0003690)	2/100	0.101805	0.231033	0.0852948	0.203855	-1.09691	2.5061	HMGB1;EGFR
ubiquitin conjugating enzyme activity (GO:0061631)	2019-01-21	0.107532	0.235743	0.100069	0.219383	-1.87614	4.18373	UBE2C
low-density lipoprotein particle receptor binding (GO:0050750)	2019-01-21	0.107532	0.235743	0.100069	0.219383	-1.82001	4.05857	CLU
ubiquitin-like protein conjugating enzyme activity (GO:0061650)	2019-01-22	0.112356	0.237196	0.104376	0.22035	-1.80779	3.95197	UBE2C
anion:anion antiporter activity (GO:0015301)	2019-01-22	0.112356	0.237196	0.104376	0.22035	-1.70486	3.72696	SLC26A3
AU-rich element binding (GO:0017091)	2019-01-22	0.112356	0.237196	0.104376	0.22035	-1.64415	3.59424	ELAVL4
bicarbonate transmembrane transporter activity (GO:0015106)	2019-01-23	0.117155	0.238493	0.108663	0.221207	-1.69916	3.64345	SLC26A3
monocarboxylic acid binding (GO:0033293)	2019-01-23	0.117155	0.238493	0.108663	0.221207	-1.61657	3.46635	UGT1A9
bHLH transcription factor binding (GO:0043425)	2019-01-23	0.117155	0.238493	0.108663	0.221207	-1.57832	3.38432	TWIST1
acetylcholine receptor activity (GO:0015464)	2019-01-24	0.121928	0.24529	0.11293	0.227188	-1.85142	3.896	CHRNB1
cysteine-type endopeptidase inhibitor activity involved in apoptotic process (GO:0043027)	2019-01-25	0.126675	0.246152	0.117176	0.227695	-2.01852	4.17054	VIL1
DNA secondary structure binding (GO:0000217)	2019-01-25	0.126675	0.246152	0.117176	0.227695	-1.76289	3.64237	HMGB1
retinoid binding (GO:0005501)	2019-01-25	0.126675	0.246152	0.117176	0.227695	-1.6755	3.4618	UGT1A9
epidermal growth factor receptor binding (GO:0005154)	2019-01-26	0.131397	0.249654	0.121403	0.230666	-1.69112	3.43219	AGR2
lipoprotein particle receptor binding (GO:0070325)	2019-01-26	0.131397	0.249654	0.121403	0.230666	-1.64496	3.3385	CLU
substrate-specific channel activity (GO:0022838)	2019-01-28	0.140765	0.264514	0.129797	0.2437	-1.65566	3.2462	AQP5
inorganic anion exchanger activity (GO:0005452)	2019-01-29	0.145411	0.264524	0.133964	0.2437	-1.87531	3.61595	SLC26A3
dicarboxylic acid transmembrane transporter activity (GO:0005310)	2019-01-29	0.145411	0.264524	0.133964	0.2437	-1.74931	3.37301	SLC26A3
channel activity (GO:0015267)	2019-01-29	0.145411	0.264524	0.133964	0.2437	-1.47006	2.83455	CHRNB1
excitatory extracellular ligand-gated ion channel activity (GO:0005231)	2019-01-30	0.150033	0.270059	0.138112	0.248601	-1.46302	2.7752	CHRNB1
nucleobase-containing compound kinase activity (GO:0019205)	2019-01-31	0.154629	0.275433	0.14224	0.253365	-1.6388	3.0592	TK1
ligand-gated channel activity (GO:0022834)	1932-01-01	0.159201	0.280654	0.146349	0.257996	-1.54366	2.83661	CHRNB1
glucuronosyltransferase activity (GO:0015020)	1934-01-01	0.168272	0.293618	0.154508	0.266878	-1.45149	2.58681	UGT1A9
RNA polymerase core enzyme binding (GO:0043175)	1935-01-01	0.172771	0.295439	0.158559	0.268452	-1.43597	2.52126	ERBB2
carboxylic acid binding (GO:0031406)	1935-01-01	0.172771	0.295439	0.158559	0.268452	-1.32604	2.32824	CD44
transmitter-gated ion channel activity involved in regulation of postsynaptic membrane potential (GO:1904315)	1937-01-01	0.181697	0.304609	0.166604	0.276596	-1.43891	2.45395	CHRNB1
peptidase inhibitor activity (GO:0030414)	1937-01-01	0.181697	0.304609	0.166604	0.276596	-1.3963	2.38127	PTTG1
frizzled binding (GO:0005109)	1938-01-01	0.186124	0.308287	0.170598	0.280503	-1.36142	2.28901	DVL1
GTPase regulator activity (GO:0030695)	3/276	0.187496	0.308287	0.148155	0.258515	-0.968843	1.62184	RANBP3;PDE6D;ECT2
RNA polymerase II transcription coactivator activity (GO:0001105)	1940-01-01	0.194907	0.31742	0.17853	0.29075	-1.47268	2.40818	TBX20
copper ion binding (GO:0005507)	1942-01-01	0.203596	0.328443	0.186388	0.300682	-1.56876	2.49687	LOXL3
damaged DNA binding (GO:0003684)	1947-01-01	0.224914	0.359442	0.20571	0.328752	-1.43248	2.13731	HMGB1
RNA polymerase II activating transcription factor binding (GO:0001102)	1948-01-01	0.22911	0.362757	0.20952	0.33174	-1.32251	1.9488	TBX20
inorganic anion transmembrane transporter activity (GO:0015103)	1949-01-01	0.233282	0.365975	0.213312	0.334646	-1.18608	1.72634	SLC26A3
amyloid-beta binding (GO:0001540)	1950-01-01	0.237433	0.3691	0.217087	0.337471	-1.17803	1.69386	CLU
transcriptional activator activity, RNA polymerase II transcription factor binding (GO:0001190)	1951-01-01	0.241561	0.372135	0.220843	0.340218	-1.49814	2.1283	TBX20
extracellular ligand-gated ion channel activity (GO:0005230)	1953-01-01	0.249751	0.381316	0.228303	0.34857	-1.69692	2.35412	CHRNB1
chloride transmembrane transporter activity (GO:0015108)	1957-01-01	0.265869	0.402333	0.243013	0.367745	-1.39237	1.84455	SLC26A3
phosphatidylinositol-4,5-bisphosphate binding (GO:0005546)	1961-01-01	0.281644	0.418793	0.257448	0.382813	-1.4689	1.86126	VIL1
ligand-gated cation channel activity (GO:0099094)	1961-01-01	0.281644	0.418793	0.257448	0.382813	-1.03232	1.30807	CHRNB1
chloride channel activity (GO:0005254)	1962-01-01	0.285535	0.420918	0.261014	0.38477	-1.27492	1.59798	SLC26A3
UDP-glycosyltransferase activity (GO:0008194)	1964-01-01	0.293255	0.4214	0.268096	0.385247	-1.36434	1.67366	UGT1A9
anion transmembrane transporter activity (GO:0008509)	1963-01-01	0.289405	0.4214	0.264563	0.385247	-1.1978	1.48518	SLC26A3
mRNA 3'-UTR binding (GO:0003730)	1964-01-01	0.293255	0.4214	0.268096	0.385247	-1.17843	1.44559	ELAVL4
secondary active transmembrane transporter activity (GO:0015291)	1967-01-01	0.304679	0.42705	0.278594	0.390489	-1.62657	1.93317	SLC26A3
anion channel activity (GO:0005253)	1967-01-01	0.304679	0.42705	0.278594	0.390489	-1.2412	1.47516	SLC26A3
metalloendopeptidase activity (GO:0004222)	1966-01-01	0.300892	0.42705	0.275111	0.390489	-1.01382	1.2176	MMP13
ligand-gated ion channel activity (GO:0015276)	1969-01-01	0.312194	0.434025	0.285511	0.39693	-1.13262	1.31852	CHRNB1
organic anion transmembrane transporter activity (GO:0008514)	1971-01-01	0.319628	0.440777	0.292362	0.399952	-0.9989	1.13934	SLC26A3
cytokine receptor activity (GO:0004896)	1974-01-01	0.33063	0.452301	0.302519	0.410561	-1.19414	1.32162	CD44
serine-type peptidase activity (GO:0008236)	2/221	0.335552	0.455392	0.288484	0.397829	-1.01293	1.1061	MMP13;PRSS22
hormone activity (GO:0005179)	1984-01-01	0.366046	0.492864	0.335351	0.446828	-1.2242	1.23032	GUCA2A
RNA polymerase II transcription cofactor activity (GO:0001104)	1985-01-01	0.369483	0.493607	0.338549	0.446828	-1.04884	1.04428	TBX20
single-stranded DNA binding (GO:0003697)	1988-01-01	0.379686	0.499433	0.348054	0.447985	-1.28293	1.2424	HMGB1
phosphatidylinositol bisphosphate binding (GO:1902936)	1988-01-01	0.379686	0.499433	0.348054	0.447985	-0.995669	0.964216	VIL1
GTPase activator activity (GO:0005096)	2/250	0.391876	0.511533	0.339693	0.446828	-0.941691	0.882185	RANBP3;ECT2
kinase binding (GO:0019900)	3/419	0.394931	0.511616	0.327637	0.441149	-0.858811	0.797873	TIAM1;DVL1;LIMS1
ion channel activity (GO:0005216)	1994-01-01	0.399604	0.512216	0.366664	0.464441	-1.01741	0.933249	CHRNB1
phosphotransferase activity, alcohol group as acceptor (GO:0016773)	2/255	0.401385	0.512216	0.348433	0.447985	-0.785713	0.717225	PDGFRA;DCLK1
transferase activity, transferring hexosyl groups (GO:0016758)	1/101	0.422042	0.526782	0.387717	0.47735	-0.938312	0.809436	UGT1A9
phosphatidylinositol binding (GO:0035091)	1/101	0.422042	0.526782	0.387717	0.47735	-0.937229	0.808502	CEACAM5
RNA polymerase II core promoter proximal region sequence-specific DNA binding (GO:0000978)	2/263	0.416455	0.526782	0.362339	0.462388	-0.726902	0.636749	MUC1;MYC
metallopeptidase activity (GO:0008237)	1/103	0.428298	0.530718	0.393605	0.47735	-0.98703	0.836937	MMP13
core promoter proximal region sequence-specific DNA binding (GO:0000987)	2/279	0.446018	0.548698	0.389828	0.47735	-0.819469	0.661636	MUC1;MYC
kinase activity (GO:0016301)	2/281	0.449656	0.549222	0.39323	0.47735	-0.893061	0.7138	PDGFRA;DCLK1
calcium ion binding (GO:0005509)	2/285	0.456892	0.550201	0.40001	0.481703	-0.894942	0.701016	VIL1;MMP13
RNA polymerase II regulatory region sequence-specific DNA binding (GO:0000977)	3/461	0.455258	0.550201	0.382974	0.47735	-0.842956	0.663314	MUC1;MYC;TBX20
protease binding (GO:0002020)	1/119	0.475995	0.569197	0.438748	0.521014	-0.948888	0.704404	TIMP1
RNA polymerase II transcription factor binding (GO:0001085)	1/122	0.484489	0.575331	0.446838	0.52696	-0.741028	0.536993	TBX20
Rab GTPase binding (GO:0017137)	1/131	0.509161	0.600459	0.470424	0.550977	-0.832832	0.562155	PDE6D
G-protein coupled receptor binding (GO:0001664)	1/134	0.517122	0.60567	0.478065	0.556117	-1.00309	0.661516	DVL1
DNA binding (GO:0003677)	5/894	0.532581	0.619533	0.430832	0.51519	-0.636165	0.400797	APP;ZEB2;MYC;HMGB1;EGFR
transcriptional repressor activity, RNA polymerase II transcription regulatory region sequence-specific binding (GO:0001227)	1/160	0.58097	0.671256	0.539907	0.617811	-0.885223	0.480726	ZEB2
protein serine/threonine kinase activity (GO:0004674)	2/369	0.595222	0.683107	0.533191	0.616052	-0.724879	0.376083	AKT2;DCLK1
transcription regulatory region DNA binding (GO:0044212)	2/375	0.604046	0.688613	0.541939	0.617811	-0.707738	0.356774	MYC;TWIST1
transcriptional activator activity, RNA polymerase II core promoter proximal region sequence-specific binding (GO:0001077)	1/176	0.616026	0.697619	0.574325	0.650394	-0.851676	0.412608	MYC
mRNA binding (GO:0003729)	1/180	0.624326	0.702367	0.582526	0.655342	-0.722273	0.34025	ELAVL4
peptidase activity, acting on L-amino acid peptides (GO:0070011)	1/186	0.636444	0.708901	0.594539	0.662356	-0.908058	0.410314	PRSS22
ubiquitin-like protein ligase activity (GO:0061659)	1/187	0.638425	0.708901	0.596507	0.662356	-0.835057	0.374732	UBE2C
ubiquitin protein ligase activity (GO:0061630)	1/193	0.650092	0.716308	0.608125	0.666344	-0.837959	0.360859	UBE2C
serine-type endopeptidase activity (GO:0004252)	1/197	0.657663	0.716308	0.615686	0.666344	-0.816342	0.342099	MMP13
microtubule binding (GO:0008017)	1/196	0.655785	0.716308	0.613809	0.666344	-0.642077	0.270906	BIRC5
RNA polymerase II regulatory region DNA binding (GO:0001012)	1/202	0.666897	0.717229	0.624937	0.672102	-0.783009	0.317212	TBX20
ubiquitin-protein transferase activity (GO:0004842)	2/418	0.663088	0.717229	0.601367	0.663443	-0.570284	0.2343	UBE2C;BIRC5
metal ion binding (GO:0046872)	2/443	0.694081	0.741799	0.633241	0.676776	-0.595384	0.217414	VIL1;MMP13
ATP binding (GO:0005524)	1/256	0.752188	0.793976	0.711915	0.751465	-0.693053	0.19736	AKT2
tubulin binding (GO:0015631)	1/256	0.752188	0.793976	0.711915	0.751465	-0.615306	0.17522	BIRC5
transcription factor activity, RNA polymerase II core promoter proximal region sequence-specific binding (GO:0000982)	1/281	0.78396	0.81685	0.745149	0.776954	-0.694481	0.169035	MYC
adenyl ribonucleotide binding (GO:0032559)	1/280	0.78277	0.81685	0.743895	0.776954	-0.676134	0.165596	AKT2
transcription coactivator activity (GO:0003713)	1/292	0.796628	0.81685	0.758551	0.777931	-0.717004	0.163023	TBX20
transcriptional activator activity, RNA polymerase II transcription regulatory region sequence-specific binding (GO:0001228)	1/285	0.788655	0.81685	0.750104	0.777381	-0.673885	0.159998	MYC
transcription regulatory region sequence-specific DNA binding (GO:0000976)	1/293	0.797743	0.81685	0.759734	0.777931	-0.610113	0.137867	TBX20
endopeptidase activity (GO:0004175)	1/355	0.856218	0.871508	0.822983	0.837679	-0.630403	0.0978576	MMP13
purine ribonucleoside triphosphate binding (GO:0035639)	1/397	0.885963	0.891175	0.856214	0.861251	-0.69693	0.0843841	AKT2
sequence-specific DNA binding (GO:0043565)	1/395	0.884696	0.891175	0.854781	0.861251	-0.616653	0.0755466	ZEB2
RNA binding (GO:0003723)	3/1388	0.982784	0.982784	0.969517	0.969517	-0.492248	0.00854829	FAM172A;ELAVL4;HMGB1
Term	Overlap	P-value	Adjusted P-value	Old P-value	Old Adjusted P-value	Z-score	Combined Score	Genes

## Sheet: EXOSOME KEGG
Term	Overlap	P-value	Adjusted P-value	Old P-value	Old Adjusted P-value	Z-score	Combined Score	Genes
Proteoglycans in cancer_Homo sapiens_hsa05205	5/203	0.000100231	0.00599354	0.00167328	0.0607131	-2.01334	18.5389	CD63;GPC1;AKT3;CTNNB1;GRB2
Neurotrophin signaling pathway_Homo sapiens_hsa04722	4/120	0.000165542	0.00599354	0.00176272	0.0607131	-1.85844	16.1801	AKT3;GRB2;CRK;TP73
Endometrial cancer_Homo sapiens_hsa05213	1952-03-01	0.000232541	0.00599354	0.00157791	0.0607131	-1.8766	15.7005	AKT3;CTNNB1;GRB2
Axon guidance_Homo sapiens_hsa04360	4/127	0.000205838	0.00599354	0.00215645	0.0607131	-1.72524	14.6445	EFNB2;EFNB1;EPHB1;EPHA2
Hepatitis C_Homo sapiens_hsa05160	4/133	0.000245637	0.00599354	0.00253935	0.0607131	-1.73511	14.4216	SCARB1;CD81;AKT3;GRB2
Renal cell carcinoma_Homo sapiens_hsa05211	1966-03-01	0.000470779	0.00957251	0.00302725	0.0607131	-1.74038	13.3333	AKT3;GRB2;CRK
B cell receptor signaling pathway_Homo sapiens_hsa04662	1973-03-01	0.000632717	0.00964894	0.00398119	0.0607131	-1.79555	13.2251	CD81;AKT3;GRB2
Chronic myeloid leukemia_Homo sapiens_hsa05220	1973-03-01	0.000632717	0.00964894	0.00398119	0.0607131	-1.70844	12.5835	AKT3;GRB2;CRK
Prostate cancer_Homo sapiens_hsa05215	1989-03-01	0.00112599	0.0131194	0.0067935	0.0828807	-1.71294	11.6293	AKT3;CTNNB1;GRB2
ErbB signaling pathway_Homo sapiens_hsa04012	1987-03-01	0.00105432	0.0131194	0.00639177	0.0828807	-1.66226	11.3946	AKT3;GRB2;CRK
Focal adhesion_Homo sapiens_hsa04510	4/202	0.0011829	0.0131194	0.0107472	0.109263	-1.67055	11.2592	AKT3;CTNNB1;GRB2;CRK
Rap1 signaling pathway_Homo sapiens_hsa04015	4/211	0.00138899	0.0141214	0.0124334	0.116683	-1.68496	11.0857	AKT3;CTNNB1;CRK;EPHA2
Estrogen signaling pathway_Homo sapiens_hsa04915	1999-03-01	0.00153041	0.0143624	0.00902676	0.100115	-1.58615	10.2818	AKT3;GRB2;HSPA1B
MAPK signaling pathway_Homo sapiens_hsa04010	4/255	0.00276686	0.0237988	0.023111	0.14332	-1.66681	9.81759	AKT3;GRB2;CRK;HSPA1B
Endocytosis_Homo sapiens_hsa04144	4/259	0.00292609	0.0237988	0.0242931	0.14332	-1.61796	9.43931	TSG101;PDCD6IP;CHMP4C;HSPA1B
Measles_Homo sapiens_hsa05162	3/136	0.00377075	0.0271687	0.0207211	0.14332	-1.47971	8.25748	AKT3;HSPA1B;TP73
Insulin signaling pathway_Homo sapiens_hsa04910	3/139	0.0040085	0.0271687	0.0219143	0.14332	-1.37898	7.61105	AKT3;GRB2;CRK
Tight junction_Homo sapiens_hsa04530	3/139	0.0040085	0.0271687	0.0219143	0.14332	-1.29238	7.1331	AKT3;RAB13;CTNNB1
Signaling pathways regulating pluripotency of stem cells_Homo sapiens_hsa04550	3/142	0.00425521	0.0273229	0.0231448	0.14332	-1.37981	7.53322	AKT3;CTNNB1;GRB2
Non-small cell lung cancer_Homo sapiens_hsa05223	1956-02-01	0.00736483	0.0422649	0.025034	0.14332	-1.25576	6.16711	AKT3;GRB2
Acute myeloid leukemia_Homo sapiens_hsa05221	1957-02-01	0.00762154	0.0422649	0.0258446	0.14332	-1.1759	5.73461	AKT3;GRB2
Legionellosis_Homo sapiens_hsa05134	1955-02-01	0.00711215	0.0422649	0.0242342	0.14332	-1.12	5.53948	EEF1G;HSPA1B
Alcoholism_Homo sapiens_hsa05034	3/179	0.00807031	0.0428077	0.0413822	0.174091	-1.35147	6.51349	HIST2H2AA3;H3F3A;GRB2
Chemokine signaling pathway_Homo sapiens_hsa04062	3/187	0.0090915	0.0443622	0.0460608	0.175607	-1.30565	6.13708	AKT3;GRB2;CRK
Glioma_Homo sapiens_hsa05214	1965-02-01	0.00981787	0.0443622	0.0327049	0.1596	-1.12492	5.20112	AKT3;GRB2
Colorectal cancer_Homo sapiens_hsa05210	1962-02-01	0.0089648	0.0443622	0.0300554	0.159425	-1.0989	5.18072	AKT3;CTNNB1
Longevity regulating pathway - multiple species_Homo sapiens_hsa04213	1964-02-01	0.00952963	0.0443622	0.0318117	0.1596	-1.06931	4.97587	AKT3;HSPA1B
Epstein-Barr virus infection_Homo sapiens_hsa05169	3/202	0.0112026	0.0455573	0.0555174	0.205246	-1.23172	5.5324	TBP;AKT3;HSPA1B
Fc epsilon RI signaling pathway_Homo sapiens_hsa04664	1968-02-01	0.0107057	0.0455573	0.0354434	0.164364	-1.09781	4.98075	AKT3;GRB2
PPAR signaling pathway_Homo sapiens_hsa03320	1969-02-01	0.0110092	0.0455573	0.0363755	0.164364	-0.774825	3.4937	SCD;UBC
Prolactin signaling pathway_Homo sapiens_hsa04917	1972-02-01	0.0119425	0.0469996	0.0392288	0.170925	-0.960117	4.25106	AKT3;GRB2
Pathways in cancer_Homo sapiens_hsa05200	4/397	0.0129455	0.0493546	0.0882888	0.280694	-1.28228	5.5741	AKT3;CTNNB1;GRB2;CRK
Bacterial invasion of epithelial cells_Homo sapiens_hsa05100	1978-02-01	0.0139094	0.0499101	0.0451825	0.175607	-0.758415	3.24237	CTNNB1;CRK
Antigen processing and presentation_Homo sapiens_hsa04612	1977-02-01	0.0135724	0.0499101	0.0441679	0.175607	-0.746322	3.20897	B2M;HSPA1B
Ras signaling pathway_Homo sapiens_hsa04014	3/227	0.0153041	0.0533457	0.0731884	0.245229	-1.12915	4.71944	AKT3;GRB2;EPHA2
Fc gamma R-mediated phagocytosis_Homo sapiens_hsa04666	1993-02-01	0.0193887	0.0657062	0.0613983	0.220311	-0.867081	3.41896	AKT3;CRK
HTLV-I infection_Homo sapiens_hsa05166	3/258	0.021426	0.0706479	0.0981859	0.281222	-1.04372	4.01117	TBP;AKT3;CTNNB1
Choline metabolism in cancer_Homo sapiens_hsa05231	2/101	0.0226241	0.0726354	0.0707506	0.245229	-0.895235	3.39181	AKT3;GRB2
T cell receptor signaling pathway_Homo sapiens_hsa04660	2/104	0.0238912	0.0747365	0.0743726	0.245229	-0.829714	3.09836	AKT3;GRB2
Toxoplasmosis_Homo sapiens_hsa05145	2/118	0.0301756	0.0897908	0.092031	0.280694	-0.81699	2.86005	AKT3;HSPA1B
Thyroid hormone signaling pathway_Homo sapiens_hsa04919	2/118	0.0301756	0.0897908	0.092031	0.280694	-0.815072	2.85334	AKT3;CTNNB1
AMPK signaling pathway_Homo sapiens_hsa04152	2/124	0.033049	0.0959994	0.0999472	0.281222	-0.742979	2.53338	SCD;AKT3
Osteoclast differentiation_Homo sapiens_hsa04380	2/132	0.0370402	0.10412	0.110792	0.292136	-0.777103	2.56114	AKT3;GRB2
FoxO signaling pathway_Homo sapiens_hsa04068	2/133	0.0375516	0.10412	0.11217	0.292136	-0.733445	2.40719	AKT3;GRB2
Systemic lupus erythematosus_Homo sapiens_hsa05322	2/135	0.0385827	0.104602	0.114939	0.292136	-0.648068	2.10943	HIST2H2AA3;H3F3A
PI3K-Akt signaling pathway_Homo sapiens_hsa04151	3/341	0.0435229	0.112961	0.178904	0.352037	-0.874411	2.74081	AKT3;GRB2;EPHA2
Phospholipase D signaling pathway_Homo sapiens_hsa04072	2/144	0.0433545	0.112961	0.127616	0.311383	-0.749811	2.35317	AKT3;GRB2
Hepatitis B_Homo sapiens_hsa05161	2/146	0.0444436	0.112961	0.130479	0.312126	-0.738384	2.29898	AKT3;GRB2
Hippo signaling pathway_Homo sapiens_hsa04390	2/153	0.0483349	0.120344	0.140618	0.323687	-0.58185	1.76277	CTNNB1;TP73
Jak-STAT signaling pathway_Homo sapiens_hsa04630	2/158	0.0511882	0.123461	0.147966	0.334294	-0.685068	2.03619	AKT3;GRB2
Biosynthesis of unsaturated fatty acids_Homo sapiens_hsa01040	2019-01-23	0.0516106	0.123461	0.0975657	0.281222	2.37676	-7.04478	SCD
Vitamin digestion and absorption_Homo sapiens_hsa04977	2019-01-24	0.0537944	0.12621	0.101424	0.281222	2.64007	-7.71582	SCARB1
Influenza A_Homo sapiens_hsa05164	2/175	0.0613246	0.138548	0.173519	0.352037	-0.597198	1.66712	AKT3;HSPA1B
Dorso-ventral axis formation_Homo sapiens_hsa04320	2019-01-27	0.0603164	0.138548	0.112905	0.292136	1.54314	-4.33336	GRB2
Thyroid cancer_Homo sapiens_hsa05216	2019-01-29	0.0646399	0.143383	0.12048	0.299971	1.46688	-4.01768	CTNNB1
SNARE interactions in vesicular transport_Homo sapiens_hsa04130	1934-01-01	0.0753637	0.164185	0.139145	0.323687	1.85708	-4.80136	VAMP2
Viral carcinogenesis_Homo sapiens_hsa05203	2/205	0.0806972	0.17272	0.220181	0.389305	-0.557805	1.40402	TBP;GRB2
Fat digestion and absorption_Homo sapiens_hsa04975	1941-01-01	0.0901752	0.189679	0.164634	0.352037	1.27812	-3.07515	SCARB1
Porphyrin and chlorophyll metabolism_Homo sapiens_hsa00860	1942-01-01	0.0922721	0.1908	0.168215	0.352037	1.36277	-3.24751	HMBS
Vasopressin-regulated water reabsorption_Homo sapiens_hsa04962	1944-01-01	0.0964517	0.190813	0.175333	0.352037	1.13995	-2.66601	VAMP2
Carbohydrate digestion and absorption_Homo sapiens_hsa04973	1945-01-01	0.0985345	0.190813	0.17887	0.352037	1.15049	-2.66609	AKT3
Basal transcription factors_Homo sapiens_hsa03022	1945-01-01	0.0985345	0.190813	0.17887	0.352037	1.15841	-2.68444	TBP
ABC transporters_Homo sapiens_hsa02010	1944-01-01	0.0964517	0.190813	0.175333	0.352037	1.25021	-2.92389	ABCG1
Fatty acid metabolism_Homo sapiens_hsa01212	1948-01-01	0.104755	0.199688	0.189392	0.36676	1.12392	-2.53572	SCD
Malaria_Homo sapiens_hsa05144	1949-01-01	0.106819	0.20049	0.192871	0.36766	1.01787	-2.2766	CD81
Ovarian steroidogenesis_Homo sapiens_hsa04913	1950-01-01	0.108878	0.201259	0.196335	0.368506	1.02523	-2.27348	SCARB1
Pathogenic Escherichia coli infection_Homo sapiens_hsa05130	1955-01-01	0.119105	0.213689	0.213441	0.388654	0.954699	-2.03136	CTNNB1
Basal cell carcinoma_Homo sapiens_hsa05217	1955-01-01	0.119105	0.213689	0.213441	0.388654	0.959375	-2.04131	CTNNB1
Regulation of lipolysis in adipocytes_Homo sapiens_hsa04923	1956-01-01	0.121137	0.214184	0.21682	0.389	0.717281	-1.51406	AKT3
mTOR signaling pathway_Homo sapiens_hsa04150	1960-01-01	0.129218	0.225208	0.230195	0.401196	0.65448	-1.33923	AKT3
VEGF signaling pathway_Homo sapiens_hsa04370	1961-01-01	0.131227	0.225488	0.233504	0.401232	0.6733	-1.36736	AKT3
Synaptic vesicle cycle_Homo sapiens_hsa04721	1963-01-01	0.135231	0.229141	0.240081	0.406803	1.00372	-2.00823	VAMP2
MicroRNAs in cancer_Homo sapiens_hsa05206	2/297	0.148989	0.230377	0.366268	0.464082	-0.0726367	0.138292	GRB2;CRK
Central carbon metabolism in cancer_Homo sapiens_hsa05230	1967-01-01	0.143185	0.230377	0.253071	0.410549	0.662994	-1.28861	AKT3
Pancreatic cancer_Homo sapiens_hsa05212	1966-01-01	0.141203	0.230377	0.249844	0.410549	0.686386	-1.34364	AKT3
Melanoma_Homo sapiens_hsa05218	1971-01-01	0.151067	0.230377	0.265847	0.410549	0.729831	-1.3794	AKT3
Adipocytokine signaling pathway_Homo sapiens_hsa04920	1970-01-01	0.149103	0.230377	0.262673	0.410549	0.76962	-1.46468	AKT3
p53 signaling pathway_Homo sapiens_hsa04115	1969-01-01	0.147135	0.230377	0.259486	0.410549	0.826197	-1.58333	TP73
Bile secretion_Homo sapiens_hsa04976	1971-01-01	0.151067	0.230377	0.265847	0.410549	0.860341	-1.62607	SCARB1
Shigellosis_Homo sapiens_hsa05131	1965-01-01	0.139217	0.230377	0.246603	0.410549	0.8593	-1.6943	CRK
Adherens junction_Homo sapiens_hsa04520	1974-01-01	0.156932	0.233485	0.27529	0.414635	0.81926	-1.51722	CTNNB1
Arrhythmogenic right ventricular cardiomyopathy (ARVC)_Homo sapiens_hsa05412	1974-01-01	0.156932	0.233485	0.27529	0.414635	0.977473	-1.81022	CTNNB1
Aldosterone synthesis and secretion_Homo sapiens_hsa04925	1981-01-01	0.170464	0.250562	0.29687	0.441684	0.666529	-1.17924	SCARB1
Insulin secretion_Homo sapiens_hsa04911	1985-01-01	0.178101	0.257405	0.30892	0.449818	0.673301	-1.16172	VAMP2
Gap junction_Homo sapiens_hsa04540	1988-01-01	0.183784	0.257405	0.317827	0.449818	0.72242	-1.22378	GRB2
Hematopoietic cell lineage_Homo sapiens_hsa04640	1988-01-01	0.183784	0.257405	0.317827	0.449818	0.727346	-1.23212	CD9
Salivary secretion_Homo sapiens_hsa04970	1989-01-01	0.185669	0.257405	0.320772	0.449818	0.735491	-1.23841	VAMP2
Small cell lung cancer_Homo sapiens_hsa05222	1986-01-01	0.179999	0.257405	0.311902	0.449818	0.731014	-1.25354	AKT3
GnRH signaling pathway_Homo sapiens_hsa04912	1991-01-01	0.189428	0.259665	0.326623	0.452818	0.650792	-1.08275	GRB2
Longevity regulating pathway - mammal_Homo sapiens_hsa04211	1994-01-01	0.195033	0.264379	0.335309	0.459637	0.664506	-1.08619	AKT3
AGE-RAGE signaling pathway in diabetic complications_Homo sapiens_hsa04933	1/101	0.207967	0.269914	0.355158	0.464082	0.569839	-0.894863	AKT3
Progesterone-mediated oocyte maturation_Homo sapiens_hsa04914	1998-01-01	0.202449	0.269914	0.346722	0.464082	0.577792	-0.922889	AKT3
Melanogenesis_Homo sapiens_hsa04916	1/100	0.206131	0.269914	0.352358	0.464082	0.631488	-0.997271	CTNNB1
Glucagon signaling pathway_Homo sapiens_hsa04922	1/101	0.207967	0.269914	0.355158	0.464082	0.688602	-1.08137	AKT3
HIF-1 signaling pathway_Homo sapiens_hsa04066	1/103	0.211624	0.271255	0.360723	0.464082	0.685535	-1.0646	AKT3
Chagas disease (American trypanosomiasis)_Homo sapiens_hsa05142	1/104	0.213447	0.271255	0.363488	0.464082	0.750383	-1.15887	AKT3
Toll-like receptor signaling pathway_Homo sapiens_hsa04620	1/106	0.21708	0.273028	0.368983	0.464082	0.707962	-1.08141	AKT3
Insulin resistance_Homo sapiens_hsa04931	1/109	0.222498	0.27583	0.37714	0.466677	0.709715	-1.06658	AKT3
TNF signaling pathway_Homo sapiens_hsa04668	1/110	0.224297	0.27583	0.379837	0.466677	0.723931	-1.08212	AKT3
Cholinergic synapse_Homo sapiens_hsa04725	1/111	0.226091	0.27583	0.382522	0.466677	0.765689	-1.13844	AKT3
Leukocyte transendothelial migration_Homo sapiens_hsa04670	1/118	0.238535	0.288132	0.401005	0.484383	0.837635	-1.20053	CTNNB1
Sphingolipid signaling pathway_Homo sapiens_hsa04071	1/120	0.242055	0.289517	0.406187	0.485512	0.816433	-1.15818	AKT3
Platelet activation_Homo sapiens_hsa04611	1/122	0.245558	0.290107	0.411326	0.485512	0.775314	-1.08871	AKT3
Lysosome_Homo sapiens_hsa04142	1/123	0.247304	0.290107	0.413879	0.485512	0.812936	-1.13578	CD63
Dopaminergic synapse_Homo sapiens_hsa04728	1/129	0.257697	0.299419	0.428975	0.498428	0.882677	-1.19688	AKT3
Spliceosome_Homo sapiens_hsa03040	1/134	0.26625	0.305512	0.441267	0.505894	0.791601	-1.04754	HSPA1B
Natural killer cell mediated cytotoxicity_Homo sapiens_hsa04650	1/135	0.267949	0.305512	0.443694	0.505894	0.847983	-1.11676	GRB2
Ribosome_Homo sapiens_hsa03010	1/137	0.271335	0.306508	0.448519	0.50666	0.847573	-1.10557	RPL13A
Apoptosis_Homo sapiens_hsa04210	1/140	0.276386	0.30935	0.45568	0.510027	0.814697	-1.04766	AKT3
Wnt signaling pathway_Homo sapiens_hsa04310	1/142	0.279735	0.310251	0.460404	0.510629	0.888482	-1.13185	CTNNB1
Adrenergic signaling in cardiomyocytes_Homo sapiens_hsa04261	1/148	0.289689	0.318397	0.474339	0.521345	0.888808	-1.10119	AKT3
Non-alcoholic fatty liver disease (NAFLD)_Homo sapiens_hsa04932	1/151	0.294615	0.32092	0.481175	0.524138	0.904332	-1.10517	AKT3
Phagosome_Homo sapiens_hsa04145	1/154	0.299508	0.323363	0.487926	0.526787	0.98208	-1.18401	SCARB1
cGMP-PKG signaling pathway_Homo sapiens_hsa04022	1/167	0.320331	0.34281	0.51621	0.552103	0.995287	-1.13304	AKT3
Protein processing in endoplasmic reticulum_Homo sapiens_hsa04141	1/169	0.32348	0.34317	0.520425	0.552103	0.9072	-1.02388	HSPA1B
Tuberculosis_Homo sapiens_hsa05152	1/178	0.337476	0.354931	0.538958	0.566185	0.997212	-1.08323	AKT3
Transcriptional misregulation in cancer_Homo sapiens_hsa05202	1/180	0.340547	0.355101	0.542981	0.566185	0.982703	-1.05857	H3F3A
Herpes simplex infection_Homo sapiens_hsa05168	1/185	0.348165	0.359967	0.552891	0.571634	1.01174	-1.06746	TBP
Huntington's disease_Homo sapiens_hsa05016	1/193	0.360175	0.369255	0.568317	0.582645	1.02497	-1.04666	TBP
cAMP signaling pathway_Homo sapiens_hsa04024	1/199	0.36904	0.375191	0.579548	0.589207	1.13133	-1.12777	AKT3
Regulation of actin cytoskeleton_Homo sapiens_hsa04810	1/214	0.390681	0.393909	0.606403	0.611414	1.04697	-0.984014	CRK
Metabolic pathways_Homo sapiens_hsa01100	1/1239	0.947409	0.947409	0.997049	0.997049	0.993191	-0.0536562	HMBS

## Sheet: Exosome Panter
Term	Overlap	P-value	Adjusted P-value	Old P-value	Old Adjusted P-value	Z-score	Combined Score	Genes
Angiogenesis_Homo sapiens_P00005	6/142	8.54217e-07	3.9294e-05	2.10938e-05	0.000970314	-1.66229	23.2274	EFNB2;EFNB1;AKT3;CTNNB1;EPHB1;CRK
p53 pathway feedback loops 2_Homo sapiens_P04398	1945-03-01	0.000151001	0.00347303	0.0012871	0.0296034	-1.53553	13.5099	AKT3;CTNNB1;TP73
p53 pathway by glucose deprivation_Homo sapiens_P04397	2019-02-21	0.00105695	0.0162066	0.00512702	0.0786143	-0.795948	5.45413	AKT3;TP73
Huntington disease_Homo sapiens_P00029	3/124	0.00290718	0.0334326	0.0201817	0.23209	-1.3627	7.95895	TBP;AKT3;TP73
p53 pathway_Homo sapiens_P00059	1971-02-01	0.0116277	0.106975	0.0467416	0.292617	-1.12439	5.00846	AKT3;TP73
P53 pathway feedback loops 1_Homo sapiens_P04392	2019-01-07	0.0159917	0.122603	0.0384107	0.292617	0.696849	-2.88195	TP73
Beta3 adrenergic receptor signaling pathway_Homo sapiens_P04379	2019-01-11	0.0250172	0.133457	0.0571135	0.292617	0.244502	-0.90177	VAMP2
Opioid prodynorphin pathway_Homo sapiens_P05916	2019-01-18	0.0406174	0.133457	0.0890573	0.292617	0.427196	-1.36855	VAMP2
Opioid proenkephalin pathway_Homo sapiens_P05915	2019-01-18	0.0406174	0.133457	0.0890573	0.292617	0.586686	-1.87948	VAMP2
5HT3 type receptor mediated signaling pathway_Homo sapiens_P04375	2019-01-16	0.0361853	0.133457	0.0800314	0.292617	0.600183	-1.99207	VAMP2
5HT4 type receptor mediated signaling pathway_Homo sapiens_P04376	2019-01-16	0.0361853	0.133457	0.0800314	0.292617	0.735086	-2.43983	VAMP2
Opioid proopiomelanocortin pathway_Homo sapiens_P05917	2019-01-18	0.0406174	0.133457	0.0890573	0.292617	0.817884	-2.62014	VAMP2
Heme biosynthesis_Homo sapiens_P02746	2019-01-11	0.0250172	0.133457	0.0571135	0.292617	1.02323	-3.77385	HMBS
General transcription by RNA polymerase I_Homo sapiens_P00022	2019-01-15	0.0339617	0.133457	0.0754884	0.292617	1.26884	-4.29187	TBP
CCKR signaling map ST_Homo sapiens_P06959	2/165	0.0552824	0.133589	0.192914	0.306001	-0.269616	0.780618	CTNNB1;CRK
Alpha adrenergic receptor signaling pathway_Homo sapiens_P00002	2019-01-23	0.0516106	0.133589	0.111274	0.295987	0.855173	-2.53476	VAMP2
Beta1 adrenergic receptor signaling pathway_Homo sapiens_P04377	2019-01-28	0.0624806	0.133589	0.133003	0.295987	1.15936	-3.21478	VAMP2
5HT1 type receptor mediated signaling pathway_Homo sapiens_P04373	2019-01-29	0.0646399	0.133589	0.13729	0.295987	1.17847	-3.22773	VAMP2
Cortocotropin releasing factor receptor signaling pathway_Homo sapiens_P04380	2019-01-30	0.0667943	0.133589	0.141559	0.295987	1.25275	-3.39011	VAMP2
Adrenaline and noradrenaline biosynthesis_Homo sapiens_P00001	2019-01-25	0.0559733	0.133589	0.120024	0.295987	1.2359	-3.56297	VAMP2
Beta2 adrenergic receptor signaling pathway_Homo sapiens_P04378	2019-01-28	0.0624806	0.133589	0.133003	0.295987	1.33278	-3.69565	VAMP2
Metabotropic glutamate receptor group II pathway_Homo sapiens_P00040	2019-01-30	0.0667943	0.133589	0.141559	0.295987	1.43389	-3.88029	VAMP2
Hypoxia response via HIF activation_Homo sapiens_P00030	2019-01-24	0.0537944	0.133589	0.115659	0.295987	1.61858	-4.73044	AKT3
Muscarinic acetylcholine receptor 2 and 4 signaling pathway_Homo sapiens_P00043	1939-01-01	0.0859672	0.146363	0.179131	0.306001	1.08707	-2.66744	VAMP2
Thyrotropin-releasing hormone receptor signaling pathway_Homo sapiens_P04394	1941-01-01	0.0901752	0.146363	0.187276	0.306001	1.16924	-2.8132	VAMP2
Oxytocin receptor mediated signaling pathway_Homo sapiens_P04391	1939-01-01	0.0859672	0.146363	0.179131	0.306001	1.25054	-3.06855	VAMP2
Muscarinic acetylcholine receptor 1 and 3 signaling pathway_Homo sapiens_P00042	1942-01-01	0.0922721	0.146363	0.191322	0.306001	1.40407	-3.34592	VAMP2
PI3 kinase pathway_Homo sapiens_P00048	1942-01-01	0.0922721	0.146363	0.191322	0.306001	1.71765	-4.09319	AKT3
Transcription regulation by bZIP transcription factor_Homo sapiens_P00055	1942-01-01	0.0922721	0.146363	0.191322	0.306001	1.85329	-4.41642	TBP
5HT2 type receptor mediated signaling pathway_Homo sapiens_P04374	1946-01-01	0.100613	0.149296	0.207323	0.30764	1.4979	-3.4399	VAMP2
Ionotropic glutamate receptor pathway_Homo sapiens_P00037	1945-01-01	0.0985345	0.149296	0.203349	0.30764	1.69428	-3.92623	VAMP2
Dopamine receptor mediated signaling pathway_Homo sapiens_P05912	1952-01-01	0.112983	0.162413	0.23079	0.331761	1.50471	-3.28105	VAMP2
Metabotropic glutamate receptor group III pathway_Homo sapiens_P00039	1954-01-01	0.117069	0.163187	0.238473	0.332417	1.80262	-3.86661	VAMP2
Nicotinic acetylcholine receptor signaling pathway_Homo sapiens_P00044	1968-01-01	0.145162	0.193377	0.290345	0.386302	1.76449	-3.4053	VAMP2
Ras Pathway_Homo sapiens_P04393	1969-01-01	0.147135	0.193377	0.293926	0.386302	1.84776	-3.54106	AKT3
Endothelin signaling pathway_Homo sapiens_P00019	1975-01-01	0.158879	0.197525	0.315069	0.391708	1.87213	-3.44399	AKT3
T cell activation_Homo sapiens_P00053	1973-01-01	0.154982	0.197525	0.308086	0.391708	1.87494	-3.49573	AKT3
Interleukin signaling pathway_Homo sapiens_P00036	1986-01-01	0.179999	0.217894	0.352358	0.426539	1.9571	-3.35604	AKT3
FGF signaling pathway_Homo sapiens_P00021	1999-01-01	0.204292	0.234936	0.394065	0.452527	2.24029	-3.55804	AKT3
Alzheimer disease-presenilin pathway_Homo sapiens_P00004	1999-01-01	0.204292	0.234936	0.394065	0.452527	2.33139	-3.70272	CTNNB1
Apoptosis signaling pathway_Homo sapiens_P00006	1/102	0.209797	0.235382	0.403339	0.452527	2.38925	-3.73108	AKT3
EGF receptor signaling pathway_Homo sapiens_P00018	1/109	0.222498	0.243689	0.424485	0.464912	2.25157	-3.38374	AKT3
Cadherin signaling pathway_Homo sapiens_P00012	1/150	0.292977	0.313417	0.535357	0.572707	2.27362	-2.79123	CTNNB1
Integrin signalling pathway_Homo sapiens_P00034	1/156	0.302752	0.316513	0.549857	0.57485	2.3263	-2.77956	CRK
Inflammation mediated by chemokine and cytokine signaling pathway_Homo sapiens_P00031	1/188	0.352695	0.360532	0.620537	0.634326	2.59143	-2.70066	AKT3
Wnt signaling pathway_Homo sapiens_P00057	1/278	0.475136	0.475136	0.769073	0.769073	2.55239	-1.89937	CTNNB1
Term	Overlap	P-value	Adjusted P-value	Old P-value	Old Adjusted P-value	Z-score	Combined Score	Genes

## Sheet: Exosome Reactome
Term	Overlap	P-value	Adjusted P-value	Old P-value	Old Adjusted P-value	Z-score	Combined Score	Genes
Disease_Homo sapiens_R-HSA-1643685	13/725	5.65311e-09	3.29011e-06	5.42914e-07	0.000315976	-2.39406	45.4657	TSG101;PDCD6IP;TBP;RPL13A;GPC1;AKT3;UBC;CHMP4C;CD9;CTNNB1;GRB2;B2M;VAMP2
Infectious disease_Homo sapiens_R-HSA-5663205	9/348	8.2392e-08	2.39761e-05	2.73092e-06	0.000568617	-2.39495	39.0659	TSG101;PDCD6IP;TBP;UBC;CHMP4C;CD9;RPL13A;B2M;VAMP2
Budding and maturation of HIV virion_Homo sapiens_R-HSA-162588	2019-04-25	2.98992e-07	5.80044e-05	2.93101e-06	0.000568617	-2.00069	30.0561	TSG101;PDCD6IP;UBC;CHMP4C
Developmental Biology_Homo sapiens_R-HSA-1266738	11/786	1.21974e-06	0.000177472	5.53119e-05	0.00581663	-2.35789	32.1071	EFNB2;HIST2H2AA3;EFNB1;GPC1;AKT3;H3F3A;UBC;CTNNB1;GRB2;EPHB1;EPHA2
EPH-ephrin mediated repulsion of cells_Homo sapiens_R-HSA-3928665	1948-04-01	4.4247e-06	0.000515035	3.15491e-05	0.00459039	-2.02333	24.9443	EFNB2;EFNB1;EPHB1;EPHA2
HIV Infection_Homo sapiens_R-HSA-162906	6/222	1.13018e-05	0.000822209	0.000128721	0.00820435	-2.3233	26.4637	TSG101;PDCD6IP;TBP;UBC;CHMP4C;B2M
Ephrin signaling_Homo sapiens_R-HSA-3928664	2019-03-19	1.07526e-05	0.000822209	5.99652e-05	0.00581663	-2.01696	23.0748	EFNB2;EFNB1;EPHB1
Late Phase of HIV Life Cycle_Homo sapiens_R-HSA-162599	5/128	1.10262e-05	0.000822209	9.52719e-05	0.00792118	-2.01414	22.9919	TSG101;PDCD6IP;TBP;UBC;CHMP4C
HIV Life Cycle_Homo sapiens_R-HSA-162587	5/141	1.76208e-05	0.00104221	0.000148004	0.00820435	-2.04946	22.4343	TSG101;PDCD6IP;TBP;UBC;CHMP4C
Amyloid fiber formation_Homo sapiens_R-HSA-977225	1968-04-01	1.79073e-05	0.00104221	0.000114067	0.00820435	-1.82057	19.8993	HIST2H2AA3;H3F3A;UBC;B2M
Uptake and actions of bacterial toxins_Homo sapiens_R-HSA-5339562	2019-03-27	3.20416e-05	0.00169529	0.000155065	0.00820435	-1.84747	19.1185	PDCD6IP;CD9;VAMP2
Endosomal Sorting Complex Required For Transport (ESCRT)_Homo sapiens_R-HSA-917729	2019-03-28	3.58288e-05	0.0017377	0.000171265	0.00830636	-2.01433	20.6202	TSG101;UBC;CHMP4C
Oxidative Stress Induced Senescence_Homo sapiens_R-HSA-2559580	1991-04-01	5.65438e-05	0.00253142	0.000333338	0.0138573	-2.00165	19.5772	HIST2H2AA3;H3F3A;UBC;TNIK
SIRT1 negatively regulates rRNA Expression_Homo sapiens_R-HSA-427359	1935-03-01	7.07784e-05	0.0027462	0.000316038	0.0138573	-2.01827	19.2865	HIST2H2AA3;TBP;H3F3A
EPH-Ephrin signaling_Homo sapiens_R-HSA-2682334	1995-04-01	6.69017e-05	0.0027462	0.000390251	0.0151417	-1.87336	18.0073	EFNB2;EFNB1;EPHB1;EPHA2
EPHB-mediated forward signaling_Homo sapiens_R-HSA-3928662	1942-03-01	0.000122755	0.0044652	0.000522699	0.0190132	-1.91904	17.2815	EFNB2;EFNB1;EPHB1
Signaling by ERBB2_Homo sapiens_R-HSA-1227986	1945-03-01	0.000151001	0.00516958	0.000632519	0.0216545	-1.89756	16.6952	AKT3;UBC;GRB2
Axon guidance_Homo sapiens_R-HSA-422475	7/515	0.00016155	0.00522344	0.00199781	0.0385479	-2.2158	19.3455	EFNB2;EFNB1;GPC1;UBC;GRB2;EPHB1;EPHA2
Cellular responses to stress_Homo sapiens_R-HSA-2262752	6/367	0.000184726	0.00565845	0.00176018	0.0385479	-2.21618	19.0517	HIST2H2AA3;H3F3A;UBC;CHMP4C;TNIK;HSPA1B
Platelet activation, signaling and aggregation_Homo sapiens_R-HSA-76002	5/253	0.000279477	0.00743123	0.00198404	0.0385479	-2.00757	16.4272	CD63;AKT3;CD9;GRB2;CRK
Membrane binding and targetting of GAG proteins_Homo sapiens_R-HSA-174490	2019-02-11	0.000280906	0.00743123	0.000931265	0.0285261	-1.08016	8.83299	TSG101;UBC
Synthesis And Processing Of GAG, GAGPOL Polyproteins_Homo sapiens_R-HSA-174495	2019-02-11	0.000280906	0.00743123	0.000931265	0.0285261	-1.0574	8.64686	TSG101;UBC
RNA Polymerase I Chain Elongation_Homo sapiens_R-HSA-73777	1957-03-01	0.000305414	0.00748581	0.00121577	0.0309327	-1.82336	14.758	HIST2H2AA3;TBP;H3F3A
B-WICH complex positively regulates rRNA expression_Homo sapiens_R-HSA-5250924	1958-03-01	0.000321556	0.00748581	0.00127557	0.0309327	-1.76001	14.1546	HIST2H2AA3;TBP;H3F3A
Formation of the beta-catenin:TCF transactivating complex_Homo sapiens_R-HSA-201722	1958-03-01	0.000321556	0.00748581	0.00127557	0.0309327	-1.49336	12.0101	HIST2H2AA3;H3F3A;CTNNB1
Regulation of TP53 Activity_Homo sapiens_R-HSA-5633007	4/151	0.00039818	0.00827645	0.00208619	0.0385479	-1.80136	14.1021	TBP;AKT3;UBC;TP73
Assembly Of The HIV Virion_Homo sapiens_R-HSA-175474	2019-02-13	0.000397209	0.00827645	0.00124807	0.0309327	-1.19578	9.36423	TSG101;UBC
Downregulation of ERBB2:ERBB3 signaling_Homo sapiens_R-HSA-1358803	2019-02-13	0.000397209	0.00827645	0.00124807	0.0309327	-1.11173	8.70597	AKT3;UBC
Regulation of TP53 Activity through Association with Co-factors_Homo sapiens_R-HSA-6804759	2019-02-14	0.000462732	0.00928656	0.00142321	0.0331323	-1.11754	8.58091	AKT3;TP73
Cellular Senescence_Homo sapiens_R-HSA-2559583	4/161	0.000507334	0.00984228	0.00261943	0.0385479	-2.00466	15.208	HIST2H2AA3;H3F3A;UBC;TNIK
Apoptosis_Homo sapiens_R-HSA-109581	4/163	0.000531482	0.00997815	0.00273635	0.0385479	-1.90378	14.3542	AKT3;UBC;CTNNB1;TP73
Programmed Cell Death_Homo sapiens_R-HSA-5357801	4/166	0.000569225	0.0103528	0.00291839	0.0394717	-1.9175	14.3261	AKT3;UBC;CTNNB1;TP73
NoRC negatively regulates rRNA expression_Homo sapiens_R-HSA-427413	1973-03-01	0.000632717	0.0105212	0.00240325	0.0385479	-1.63515	12.0437	HIST2H2AA3;TBP;H3F3A
Positive epigenetic regulation of rRNA expression_Homo sapiens_R-HSA-5250913	1973-03-01	0.000632717	0.0105212	0.00240325	0.0385479	-1.57201	11.5786	HIST2H2AA3;TBP;H3F3A
Spry regulation of FGF signaling_Homo sapiens_R-HSA-1295596	2019-02-16	0.000608411	0.0105212	0.00180656	0.0385479	-1.37484	10.1802	UBC;GRB2
VEGFA-VEGFR2 Pathway_Homo sapiens_R-HSA-4420097	5/320	0.00081376	0.0110585	0.00536073	0.0623989	-2.16884	15.4288	AKT3;UBC;CTNNB1;GRB2;CRK
Vesicle-mediated transport_Homo sapiens_R-HSA-5653656	6/492	0.00087404	0.0110585	0.00735089	0.0701347	-1.80451	12.708	SCARB1;TSG101;RAB13;UBC;CHMP4C;VAMP2
RNA Polymerase I Promoter Clearance_Homo sapiens_R-HSA-73854	1976-03-01	0.000711721	0.0110585	0.00268393	0.0385479	-1.67134	12.1136	HIST2H2AA3;TBP;H3F3A
Senescence-Associated Secretory Phenotype (SASP)_Homo sapiens_R-HSA-2559582	1977-03-01	0.000739387	0.0110585	0.00278181	0.0385479	-1.67245	12.0579	HIST2H2AA3;H3F3A;UBC
RNA Polymerase I Transcription_Homo sapiens_R-HSA-73864	1979-03-01	0.000796753	0.0110585	0.00298412	0.0394717	-1.66311	11.8662	HIST2H2AA3;TBP;H3F3A
Negative epigenetic regulation of rRNA expression_Homo sapiens_R-HSA-5250941	1976-03-01	0.000711721	0.0110585	0.00268393	0.0385479	-1.62161	11.7531	HIST2H2AA3;TBP;H3F3A
Constitutive Signaling by Ligand-Responsive EGFR Cancer Variants_Homo sapiens_R-HSA-1236382	2019-02-19	0.000863184	0.0110585	0.00246316	0.0385479	-1.3002	9.17273	UBC;GRB2
Signaling by EGFR in Cancer_Homo sapiens_R-HSA-1643713	2019-02-19	0.000863184	0.0110585	0.00246316	0.0385479	-1.25733	8.87029	UBC;GRB2
Signaling by Ligand-Responsive EGFR Variants in Cancer_Homo sapiens_R-HSA-5637815	2019-02-19	0.000863184	0.0110585	0.00246316	0.0385479	-1.24159	8.7593	UBC;GRB2
Regulation of signaling by CBL_Homo sapiens_R-HSA-912631	2019-02-18	0.000773455	0.0110585	0.00223352	0.0385479	-1.20906	8.66245	GRB2;CRK
HDL-mediated lipid transport_Homo sapiens_R-HSA-194223	2019-02-19	0.000863184	0.0110585	0.00246316	0.0385479	-1.14703	8.09217	SCARB1;ABCG1
Signaling by VEGF_Homo sapiens_R-HSA-194138	5/328	0.000908923	0.0112552	0.00593768	0.0649984	-2.09874	14.698	AKT3;UBC;CTNNB1;GRB2;CRK
TCF dependent signaling in response to WNT_Homo sapiens_R-HSA-201681	4/199	0.00111927	0.0135712	0.00549888	0.0627519	-1.8664	12.6823	HIST2H2AA3;H3F3A;UBC;CTNNB1
Hemostasis_Homo sapiens_R-HSA-109582	6/552	0.0015777	0.0187392	0.0125426	0.101386	-1.76309	11.3751	CD63;AKT3;H3F3A;CD9;GRB2;CRK
VEGFR2 mediated vascular permeability_Homo sapiens_R-HSA-5218920	2019-02-27	0.00175118	0.0195997	0.00467851	0.0579339	-1.2635	8.02004	AKT3;CTNNB1
Integrin alphaIIb beta3 signaling_Homo sapiens_R-HSA-354192	2019-02-27	0.00175118	0.0195997	0.00467851	0.0579339	-1.24831	7.92361	GRB2;CRK
EGFR downregulation_Homo sapiens_R-HSA-182971	2019-02-27	0.00175118	0.0195997	0.00467851	0.0579339	-1.205	7.64869	UBC;GRB2
Negative regulation of FGFR3 signaling_Homo sapiens_R-HSA-5654732	2029-02-01	0.00201966	0.0217675	0.00533474	0.0623989	-1.45359	9.0193	UBC;GRB2
Activation of BH3-only proteins_Homo sapiens_R-HSA-114452	2029-02-01	0.00201966	0.0217675	0.00533474	0.0623989	-1.04664	6.49424	AKT3;TP73
RNA Polymerase I Promoter Opening_Homo sapiens_R-HSA-73728	1930-02-01	0.00216076	0.0228648	0.00567782	0.0635479	-1.16684	7.16123	HIST2H2AA3;H3F3A
Epigenetic regulation of gene expression_Homo sapiens_R-HSA-212165	3/115	0.00234814	0.0238288	0.00824941	0.0744475	-1.5191	9.19681	HIST2H2AA3;TBP;H3F3A
RNA Polymerase I, RNA Polymerase III, and Mitochondrial Transcription_Homo sapiens_R-HSA-504046	3/116	0.00240662	0.0238288	0.0084425	0.0744475	-1.45668	8.7831	HIST2H2AA3;TBP;H3F3A
Negative regulation of FGFR4 signaling_Homo sapiens_R-HSA-5654733	1931-02-01	0.00230641	0.0238288	0.00603078	0.0649984	-1.442	8.7559	UBC;GRB2
Negative regulation of FGFR1 signaling_Homo sapiens_R-HSA-5654726	1932-02-01	0.00245657	0.0238288	0.00639356	0.0664474	-1.45187	8.72429	UBC;GRB2
DNA methylation_Homo sapiens_R-HSA-5334118	1932-02-01	0.00245657	0.0238288	0.00639356	0.0664474	-1.19143	7.15929	HIST2H2AA3;H3F3A
RHO GTPase Effectors_Homo sapiens_R-HSA-195258	4/255	0.00276686	0.0244298	0.0127643	0.101765	-1.75731	10.3506	HIST2H2AA3;H3F3A;CTNNB1;GRB2
Membrane Trafficking_Homo sapiens_R-HSA-199991	5/420	0.0026932	0.0244298	0.016059	0.122131	-1.6591	9.81694	TSG101;RAB13;UBC;CHMP4C;VAMP2
Negative regulation of FGFR2 signaling_Homo sapiens_R-HSA-5654727	1934-02-01	0.00277039	0.0244298	0.00714827	0.0693383	-1.40402	8.26792	UBC;GRB2
CD28 co-stimulation_Homo sapiens_R-HSA-389356	1933-02-01	0.00261124	0.0244298	0.00676608	0.0690852	-1.326	7.88694	AKT3;GRB2
Activated PKN1 stimulates transcription of AR (androgen receptor) regulated genes KLK2 and KLK3_Homo sapiens_R-HSA-5625886	1934-02-01	0.00277039	0.0244298	0.00714827	0.0693383	-1.16359	6.85209	HIST2H2AA3;H3F3A
Lipoprotein metabolism_Homo sapiens_R-HSA-174824	1934-02-01	0.00277039	0.0244298	0.00714827	0.0693383	-1.09526	6.44973	SCARB1;ABCG1
Metabolism of proteins_Homo sapiens_R-HSA-392499	8/1074	0.00284445	0.0247085	0.0318985	0.181065	-1.62206	9.50913	EEF1G;HIST2H2AA3;H3F3A;UBC;RPL13A;CTNNB1;B2M;VAMP2
Regulation of TP53 Degradation_Homo sapiens_R-HSA-6804757	1935-02-01	0.00293401	0.0251116	0.00754007	0.0707794	-1.25053	7.29232	AKT3;UBC
Regulation of TP53 Expression and Degradation_Homo sapiens_R-HSA-6806003	1936-02-01	0.00310206	0.0261652	0.00794141	0.0733635	-1.26484	7.30532	AKT3;UBC
Platelet Aggregation (Plug Formation)_Homo sapiens_R-HSA-76009	1937-02-01	0.00327454	0.0272254	0.00835221	0.0744475	-1.03123	5.90028	GRB2;CRK
PRC2 methylates histones and DNA_Homo sapiens_R-HSA-212300	1940-02-01	0.00381828	0.0312991	0.00964075	0.083745	-1.15614	6.43731	HIST2H2AA3;H3F3A
Condensation of Prophase Chromosomes_Homo sapiens_R-HSA-2299718	1941-02-01	0.00400823	0.0323999	0.0100887	0.0863478	-1.13836	6.28309	HIST2H2AA3;H3F3A
Intrinsic Pathway for Apoptosis_Homo sapiens_R-HSA-109606	1942-02-01	0.00420251	0.0330522	0.0105459	0.0876814	-1.0563	5.78017	AKT3;TP73
Deactivation of the beta-catenin transactivating complex_Homo sapiens_R-HSA-3769402	1942-02-01	0.00420251	0.0330522	0.0105459	0.0876814	-1.02023	5.58275	UBC;CTNNB1
Diseases of signal transduction_Homo sapiens_R-HSA-5663202	4/288	0.00427259	0.0331553	0.0190546	0.140377	-1.77612	9.68967	AKT3;UBC;CTNNB1;GRB2
ERCC6 (CSB) and EHMT2 (G9a) positively regulate rRNA expression_Homo sapiens_R-HSA-427389	1943-02-01	0.00440108	0.033703	0.0110121	0.090268	-0.947678	5.14201	HIST2H2AA3;H3F3A
Signaling by Wnt_Homo sapiens_R-HSA-195721	4/295	0.00465117	0.0351556	0.0205989	0.141411	-1.74564	9.3752	HIST2H2AA3;H3F3A;UBC;CTNNB1
G beta:gamma signalling through PI3Kgamma_Homo sapiens_R-HSA-392451	1948-02-01	0.00545775	0.0407232	0.0134767	0.105993	-1.07936	5.62425	AKT3;GRB2
G-protein beta:gamma signalling_Homo sapiens_R-HSA-397795	1951-02-01	0.00614208	0.0452493	0.0150601	0.116866	-1.06778	5.43777	AKT3;GRB2
GPVI-mediated activation cascade_Homo sapiens_R-HSA-114604	1953-02-01	0.00661895	0.0481528	0.0161582	0.122131	-1.02299	5.13316	AKT3;GRB2
Meiotic recombination_Homo sapiens_R-HSA-912446	1954-02-01	0.00686352	0.0493156	0.0167199	0.124756	-1.2654	6.30364	HIST2H2AA3;H3F3A
Downstream signal transduction_Homo sapiens_R-HSA-186763	4/341	0.00771363	0.054748	0.0326777	0.181065	-1.8563	9.03045	AKT3;UBC;GRB2;CRK
DAP12 signaling_Homo sapiens_R-HSA-2424491	4/344	0.00795018	0.0557471	0.0335847	0.181065	-1.87346	9.05733	AKT3;UBC;GRB2;B2M
Transcriptional Regulation by TP53_Homo sapiens_R-HSA-3700989	4/348	0.00827297	0.0569522	0.0348173	0.181065	-1.61266	7.73234	TBP;AKT3;UBC;TP73
RHO GTPases activate PKNs_Homo sapiens_R-HSA-5625740	1960-02-01	0.00841562	0.0569522	0.0202616	0.141411	-1.11635	5.33353	HIST2H2AA3;H3F3A
Translocation of GLUT4 to the plasma membrane_Homo sapiens_R-HSA-1445148	1960-02-01	0.00841562	0.0569522	0.0202616	0.141411	-1.09473	5.23027	RAB13;VAMP2
DAP12 interactions_Homo sapiens_R-HSA-2172127	4/359	0.00920488	0.0615775	0.0383436	0.181065	-1.78305	8.35897	AKT3;UBC;GRB2;B2M
Signaling by PDGF_Homo sapiens_R-HSA-186797	4/364	0.00965029	0.0632688	0.040013	0.181065	-1.80362	8.37019	AKT3;UBC;GRB2;CRK
Downstream signaling events of B Cell Receptor (BCR)_Homo sapiens_R-HSA-1168372	3/192	0.00976653	0.0632688	0.0312923	0.181065	-1.68932	7.81952	AKT3;UBC;GRB2
Innate Immune System_Homo sapiens_R-HSA-168249	6/807	0.010025	0.0632688	0.063451	0.19146	-1.60701	7.39651	AKT3;UBC;CTNNB1;GRB2;B2M;CRK
Signaling by Rho GTPases_Homo sapiens_R-HSA-194315	4/367	0.00992419	0.0632688	0.0410348	0.181065	-1.48147	6.83369	HIST2H2AA3;H3F3A;CTNNB1;GRB2
ER-Phagosome pathway_Homo sapiens_R-HSA-1236974	1965-02-01	0.00981787	0.0632688	0.0234316	0.154968	-1.25084	5.78331	UBC;B2M
Cytosolic sensors of pathogen-associated DNA_Homo sapiens_R-HSA-1834949	1966-02-01	0.01011	0.0632688	0.0240888	0.157524	-1.06436	4.8899	UBC;CTNNB1
Signaling by PTK6_Homo sapiens_R-HSA-8848021	1967-02-01	0.0104059	0.064428	0.0247535	0.158313	-1.12784	5.14904	UBC;CRK
NGF signalling via TRKA from the plasma membrane_Homo sapiens_R-HSA-187037	4/374	0.0105829	0.0648342	0.0434772	0.185477	-1.72172	7.83127	AKT3;UBC;GRB2;CRK
Scavenging by Class B Receptors_Homo sapiens_R-HSA-3000471	2019-01-05	0.0114484	0.0666295	0.0211388	0.141411	3.75897	-16.8022	SCARB1
LRR FLII-interacting protein 1 (LRRFIP1) activates type I IFN production_Homo sapiens_R-HSA-3134973	2019-01-05	0.0114484	0.0666295	0.0211388	0.141411	5.64838	-25.2477	CTNNB1
Sperm:Oocyte Membrane Binding_Homo sapiens_R-HSA-1300652	2019-01-05	0.0114484	0.0666295	0.0211388	0.141411	6.78278	-30.3184	CD9
Toxicity of botulinum toxin type D (BoNT/D)_Homo sapiens_R-HSA-5250955	2019-01-05	0.0114484	0.0666295	0.0211388	0.141411	11.6785	-52.2019	VAMP2
Toxicity of botulinum toxin type F (BoNT/F)_Homo sapiens_R-HSA-5250981	2019-01-05	0.0114484	0.0666295	0.0211388	0.141411	11.8396	-52.922	VAMP2
Lipid digestion, mobilization, and transport_Homo sapiens_R-HSA-73923	1971-02-01	0.0116277	0.067003	0.0274867	0.172691	-0.887773	3.95447	SCARB1;ABCG1
Transcriptional regulation by small RNAs_Homo sapiens_R-HSA-5578749	1972-02-01	0.0119425	0.0674811	0.0281884	0.172691	-1.06955	4.73561	HIST2H2AA3;H3F3A
Costimulation by the CD28 family_Homo sapiens_R-HSA-388841	1972-02-01	0.0119425	0.0674811	0.0281884	0.172691	-1.02456	4.5364	AKT3;GRB2
Uptake and function of diphtheria toxin_Homo sapiens_R-HSA-5336415	2019-01-06	0.0137226	0.0767938	0.0246196	0.158313	6.20835	-26.6258	CD9
Peptide hormone metabolism_Homo sapiens_R-HSA-2980736	1981-02-01	0.0149419	0.0828209	0.0348217	0.181065	-1.06752	4.48742	CTNNB1;VAMP2
Degradation of beta-catenin by the destruction complex_Homo sapiens_R-HSA-195253	1982-02-01	0.0152933	0.0831839	0.0355931	0.181065	-1.27617	5.33482	UBC;CTNNB1
Antigen processing-Cross presentation_Homo sapiens_R-HSA-1236975	1982-02-01	0.0152933	0.0831839	0.0355931	0.181065	-1.14111	4.77024	UBC;B2M
Binding of TCF/LEF:CTNNB1 to target gene promoters_Homo sapiens_R-HSA-4411364	2019-01-07	0.0159917	0.0861776	0.0280884	0.172691	5.48161	-22.6702	CTNNB1
Signaling by the B Cell Receptor (BCR)_Homo sapiens_R-HSA-983705	3/233	0.0163988	0.0867645	0.0504631	0.186414	-1.48913	6.12113	AKT3;UBC;GRB2
Meiosis_Homo sapiens_R-HSA-1500620	1985-02-01	0.0163686	0.0867645	0.037947	0.181065	-1.0365	4.26251	HIST2H2AA3;H3F3A
PI3K/AKT Signaling in Cancer_Homo sapiens_R-HSA-2219528	1986-02-01	0.016734	0.0877404	0.0387447	0.181065	-0.957133	3.91497	AKT3;GRB2
ARMS-mediated activation_Homo sapiens_R-HSA-170984	3/239	0.0175366	0.0885403	0.0536602	0.186414	-1.49979	6.06435	UBC;GRB2;CRK
Prolonged ERK activation events_Homo sapiens_R-HSA-169893	3/242	0.0181218	0.0885403	0.0552952	0.186414	-1.47813	5.92824	UBC;GRB2;CRK
Negative regulation of the PI3K/AKT network_Homo sapiens_R-HSA-199418	1990-02-01	0.0182305	0.0885403	0.0419996	0.181065	-1.05244	4.21466	AKT3;GRB2
Eukaryotic Translation Elongation_Homo sapiens_R-HSA-156842	1989-02-01	0.0178512	0.0885403	0.0411764	0.181065	-1.00896	4.06177	EEF1G;RPL13A
Activation of anterior HOX genes in hindbrain development during early embryogenesis_Homo sapiens_R-HSA-5617472	1989-02-01	0.0178512	0.0885403	0.0411764	0.181065	-1.00578	4.04896	HIST2H2AA3;H3F3A
Activation of HOX genes during differentiation_Homo sapiens_R-HSA-5619507	1989-02-01	0.0178512	0.0885403	0.0411764	0.181065	-0.996446	4.01138	HIST2H2AA3;H3F3A
Regulation of TP53 Activity through Phosphorylation_Homo sapiens_R-HSA-6804756	1989-02-01	0.0178512	0.0885403	0.0411764	0.181065	-0.922554	3.71391	TBP;UBC
Downregulation of ERBB4 signaling_Homo sapiens_R-HSA-1253288	2019-01-08	0.0182557	0.0885403	0.0315452	0.181065	2.57256	-10.2987	UBC
Activation of PUMA and translocation to mitochondria_Homo sapiens_R-HSA-139915	2019-01-08	0.0182557	0.0885403	0.0315452	0.181065	4.2542	-17.0307	TP73
Signalling to ERKs_Homo sapiens_R-HSA-187687	3/253	0.0203602	0.0932775	0.0614954	0.1903	-1.42984	5.56806	UBC;GRB2;CRK
Signalling by NGF_Homo sapiens_R-HSA-166520	4/450	0.0196096	0.0932775	0.0752512	0.195072	-1.40511	5.52452	AKT3;UBC;GRB2;CRK
SHC-related events triggered by IGF1R_Homo sapiens_R-HSA-2428933	2019-01-09	0.0205146	0.0932775	0.0349901	0.181065	2.79295	-10.8551	GRB2
PTK6 Regulates RTKs and Their Effectors AKT1 and DOK1_Homo sapiens_R-HSA-8849469	2019-01-09	0.0205146	0.0932775	0.0349901	0.181065	2.86404	-11.1314	UBC
AKT phosphorylates targets in the nucleus_Homo sapiens_R-HSA-198693	2019-01-09	0.0205146	0.0932775	0.0349901	0.181065	2.93786	-11.4183	AKT3
EGFR Transactivation by Gastrin_Homo sapiens_R-HSA-2179392	2019-01-09	0.0205146	0.0932775	0.0349901	0.181065	3.05931	-11.8904	GRB2
Inactivation of Cdc42 and Rac_Homo sapiens_R-HSA-428543	2019-01-09	0.0205146	0.0932775	0.0349901	0.181065	3.87841	-15.0739	GPC1
Role of Abl in Robo-Slit signaling_Homo sapiens_R-HSA-428890	2019-01-09	0.0205146	0.0932775	0.0349901	0.181065	4.24657	-16.5048	GPC1
Interleukin-3, 5 and GM-CSF signaling_Homo sapiens_R-HSA-512988	3/261	0.02208	0.0946518	0.0662039	0.192653	-1.35815	5.17875	UBC;GRB2;CRK
Gene Silencing by RNA_Homo sapiens_R-HSA-211000	2/101	0.0226241	0.0946518	0.0514561	0.186414	-1.02986	3.90188	HIST2H2AA3;H3F3A
Regulation of actin dynamics for phagocytic cup formation_Homo sapiens_R-HSA-2029482	1997-02-01	0.0209801	0.0946518	0.0479342	0.186414	-0.837812	3.23746	GRB2;CRK
Diseases of carbohydrate metabolism_Homo sapiens_R-HSA-5663084	2019-01-10	0.0227685	0.0946518	0.0384232	0.181065	2.45551	-9.28766	UBC
Glycogen storage diseases_Homo sapiens_R-HSA-3229121	2019-01-10	0.0227685	0.0946518	0.0384232	0.181065	2.45603	-9.28964	UBC
Myoclonic epilepsy of Lafora_Homo sapiens_R-HSA-3785653	2019-01-10	0.0227685	0.0946518	0.0384232	0.181065	2.54482	-9.62547	UBC
IRAK2 mediated activation of TAK1 complex upon TLR7/8 or 9 stimulation_Homo sapiens_R-HSA-975163	2019-01-10	0.0227685	0.0946518	0.0384232	0.181065	2.77795	-10.5072	UBC
Signaling by FGFR3 fusions in cancer_Homo sapiens_R-HSA-8853334	2019-01-10	0.0227685	0.0946518	0.0384232	0.181065	2.78407	-10.5304	GRB2
IRAK2 mediated activation of TAK1 complex_Homo sapiens_R-HSA-937042	2019-01-10	0.0227685	0.0946518	0.0384232	0.181065	2.80361	-10.6043	UBC
Signal attenuation_Homo sapiens_R-HSA-74749	2019-01-10	0.0227685	0.0946518	0.0384232	0.181065	2.92005	-11.0447	GRB2
Nef mediated downregulation of MHC class I complex cell surface expression_Homo sapiens_R-HSA-164940	2019-01-10	0.0227685	0.0946518	0.0384232	0.181065	4.84528	-18.3267	B2M
Neurotoxicity of clostridium toxins_Homo sapiens_R-HSA-168799	2019-01-10	0.0227685	0.0946518	0.0384232	0.181065	6.93061	-26.2142	VAMP2
M Phase_Homo sapiens_R-HSA-68886	3/268	0.0236485	0.0976129	0.0704585	0.193195	-1.19694	4.48189	HIST2H2AA3;H3F3A;UBC
Mitotic Prophase_Homo sapiens_R-HSA-68875	2/107	0.0251868	0.0990455	0.0569087	0.187949	-0.842113	3.10018	HIST2H2AA3;H3F3A
Platelet degranulation_Homo sapiens_R-HSA-114608	2/105	0.0243199	0.0990455	0.0550691	0.186414	-0.751743	2.79382	CD63;CD9
Signaling by FGFR4 in disease_Homo sapiens_R-HSA-5655291	2019-01-11	0.0250172	0.0990455	0.0418444	0.181065	2.85276	-10.5215	GRB2
RHO GTPases activate IQGAPs_Homo sapiens_R-HSA-5626467	2019-01-11	0.0250172	0.0990455	0.0418444	0.181065	3.6925	-13.6186	CTNNB1
Uptake and function of anthrax toxins_Homo sapiens_R-HSA-5210891	2019-01-11	0.0250172	0.0990455	0.0418444	0.181065	3.73014	-13.7575	PDCD6IP
Heme biosynthesis_Homo sapiens_R-HSA-189451	2019-01-11	0.0250172	0.0990455	0.0418444	0.181065	3.96695	-14.6309	HMBS
Apoptotic cleavage of cell adhesion proteins_Homo sapiens_R-HSA-351906	2019-01-11	0.0250172	0.0990455	0.0418444	0.181065	4.56711	-16.8444	CTNNB1
Response to elevated platelet cytosolic Ca2+_Homo sapiens_R-HSA-76005	2/110	0.0265107	0.10236	0.0597086	0.189893	-0.701459	2.54644	CD63;CD9
CD28 dependent Vav1 pathway_Homo sapiens_R-HSA-389359	2019-01-12	0.0272609	0.10236	0.0452538	0.185477	3.3993	-12.2453	GRB2
TP53 Regulates Transcription of Caspase Activators and Caspases_Homo sapiens_R-HSA-6803207	2019-01-12	0.0272609	0.10236	0.0452538	0.185477	3.58669	-12.9203	TP73
Defective EXT1 causes exostoses 1, TRPS2 and CHDS_Homo sapiens_R-HSA-3656253	2019-01-12	0.0272609	0.10236	0.0452538	0.185477	3.68663	-13.2804	GPC1
Defective EXT2 causes exostoses 2_Homo sapiens_R-HSA-3656237	2019-01-12	0.0272609	0.10236	0.0452538	0.185477	3.76299	-13.5554	GPC1
Endosomal/Vacuolar pathway_Homo sapiens_R-HSA-1236977	2019-01-12	0.0272609	0.10236	0.0452538	0.185477	3.89528	-14.032	B2M
TP53 Regulates Transcription of Death Receptors and Ligands_Homo sapiens_R-HSA-6803211	2019-01-12	0.0272609	0.10236	0.0452538	0.185477	4.80631	-17.3138	TP73
Metabolism_Homo sapiens_R-HSA-1430728	1908-09-01	0.0277668	0.102947	0.2268	0.297685	-0.962193	3.44842	SCARB1;SCD;GPC1;UBC;HMBS;RPL13A;CPNE3;VAMP2;ABCG1
Adaptive Immune System_Homo sapiens_R-HSA-1280218	5/762	0.0299605	0.102947	0.131767	0.248988	-0.925449	3.24636	CD81;AKT3;UBC;GRB2;B2M
Gene Expression_Homo sapiens_R-HSA-74160	8/1631	0.0309662	0.102947	0.214922	0.293041	-0.850452	2.9552	EEF1G;HIST2H2AA3;TBP;AKT3;H3F3A;UBC;RPL13A;TP73
PI-3K cascade:FGFR1_Homo sapiens_R-HSA-5654689	2/122	0.0320796	0.102947	0.0713692	0.193195	-0.730251	2.51172	AKT3;GRB2
GAB1 signalosome_Homo sapiens_R-HSA-180292	2/125	0.033538	0.102947	0.0743935	0.195072	-0.735128	2.49581	AKT3;GRB2
PI-3K cascade:FGFR2_Homo sapiens_R-HSA-5654695	2/122	0.0320796	0.102947	0.0713692	0.193195	-0.721911	2.48304	AKT3;GRB2
PI-3K cascade:FGFR3_Homo sapiens_R-HSA-5654710	2/122	0.0320796	0.102947	0.0713692	0.193195	-0.712573	2.45092	AKT3;GRB2
PI3K/AKT activation_Homo sapiens_R-HSA-198203	2/125	0.033538	0.102947	0.0743935	0.195072	-0.71739	2.43559	AKT3;GRB2
PI-3K cascade:FGFR4_Homo sapiens_R-HSA-5654720	2/122	0.0320796	0.102947	0.0713692	0.193195	-0.70496	2.42473	AKT3;GRB2
PI3K events in ERBB4 signaling_Homo sapiens_R-HSA-1250342	2/122	0.0320796	0.102947	0.0713692	0.193195	-0.694593	2.38908	AKT3;GRB2
PIP3 activates AKT signaling_Homo sapiens_R-HSA-1257604	2/122	0.0320796	0.102947	0.0713692	0.193195	-0.687677	2.36529	AKT3;GRB2
Fcgamma receptor (FCGR) dependent phagocytosis_Homo sapiens_R-HSA-2029480	2/120	0.0311217	0.102947	0.0693765	0.193195	-0.625669	2.17098	GRB2;CRK
Glycogen synthesis_Homo sapiens_R-HSA-3322077	2019-01-15	0.0339617	0.102947	0.0554117	0.186414	2.19892	-7.43788	UBC
Constitutive Signaling by NOTCH1 HD Domain Mutants_Homo sapiens_R-HSA-2691232	2019-01-15	0.0339617	0.102947	0.0554117	0.186414	2.22574	-7.52862	UBC
NF-kB is activated and signals survival_Homo sapiens_R-HSA-209560	2019-01-13	0.0294996	0.102947	0.0486515	0.186414	2.19477	-7.73302	UBC
Receptor-ligand binding initiates the second proteolytic cleavage of Notch receptor_Homo sapiens_R-HSA-156988	2019-01-14	0.0317332	0.102947	0.0520375	0.186414	2.39201	-8.25339	UBC
Association of licensing factors with the pre-replicative complex_Homo sapiens_R-HSA-69298	2019-01-15	0.0339617	0.102947	0.0554117	0.186414	2.45888	-8.3172	UBC
Regulation of innate immune responses to cytosolic DNA_Homo sapiens_R-HSA-3134975	2019-01-15	0.0339617	0.102947	0.0554117	0.186414	2.50288	-8.46604	UBC
Signaling by NOTCH1 HD Domain Mutants in Cancer_Homo sapiens_R-HSA-2691230	2019-01-15	0.0339617	0.102947	0.0554117	0.186414	2.51475	-8.50621	UBC
NRIF signals cell death from the nucleus_Homo sapiens_R-HSA-205043	2019-01-15	0.0339617	0.102947	0.0554117	0.186414	2.56143	-8.66408	UBC
AKT phosphorylates targets in the cytosol_Homo sapiens_R-HSA-198323	2019-01-13	0.0294996	0.102947	0.0486515	0.186414	2.52313	-8.88996	AKT3
Constitutive Signaling by EGFRvIII_Homo sapiens_R-HSA-5637810	2019-01-15	0.0339617	0.102947	0.0554117	0.186414	2.69239	-9.10708	GRB2
p75NTR recruits signalling complexes_Homo sapiens_R-HSA-209543	2019-01-13	0.0294996	0.102947	0.0486515	0.186414	2.61031	-9.19712	UBC
Activation of BAD and translocation to mitochondria_Homo sapiens_R-HSA-111447	2019-01-15	0.0339617	0.102947	0.0554117	0.186414	2.79451	-9.45247	AKT3
TP53 regulates transcription of several additional cell death genes whose specific roles in p53-dependent apoptosis remain uncertain_Homo sapiens_R-HSA-6803205	2019-01-14	0.0317332	0.102947	0.0520375	0.186414	2.83547	-9.78349	TP73
Signaling by EGFRvIII in Cancer_Homo sapiens_R-HSA-5637812	2019-01-15	0.0339617	0.102947	0.0554117	0.186414	2.96874	-10.0418	GRB2
Activation of Rac_Homo sapiens_R-HSA-428540	2019-01-14	0.0317332	0.102947	0.0520375	0.186414	3.11843	-10.7598	GPC1
Signal regulatory protein (SIRP) family interactions_Homo sapiens_R-HSA-391160	2019-01-13	0.0294996	0.102947	0.0486515	0.186414	3.18601	-11.2255	GRB2
Misspliced GSK3beta mutants stabilize beta-catenin_Homo sapiens_R-HSA-5339716	2019-01-15	0.0339617	0.102947	0.0554117	0.186414	3.35766	-11.3574	CTNNB1
phosphorylation site mutants of CTNNB1 are not targeted to the proteasome by the destruction complex_Homo sapiens_R-HSA-4839743	2019-01-15	0.0339617	0.102947	0.0554117	0.186414	3.45689	-11.693	CTNNB1
S37 mutants of beta-catenin aren't phosphorylated_Homo sapiens_R-HSA-5358749	2019-01-15	0.0339617	0.102947	0.0554117	0.186414	3.54404	-11.9878	CTNNB1
S45 mutants of beta-catenin aren't phosphorylated_Homo sapiens_R-HSA-5358751	2019-01-15	0.0339617	0.102947	0.0554117	0.186414	3.57783	-12.1021	CTNNB1
S33 mutants of beta-catenin aren't phosphorylated_Homo sapiens_R-HSA-5358747	2019-01-15	0.0339617	0.102947	0.0554117	0.186414	3.61256	-12.2196	CTNNB1
T41 mutants of beta-catenin aren't phosphorylated_Homo sapiens_R-HSA-5358752	2019-01-15	0.0339617	0.102947	0.0554117	0.186414	3.70161	-12.5208	CTNNB1
p130Cas linkage to MAPK signaling for integrins_Homo sapiens_R-HSA-372708	2019-01-15	0.0339617	0.102947	0.0554117	0.186414	3.74013	-12.6511	CRK
GRB2:SOS provides linkage to MAPK signaling for Integrins_Homo sapiens_R-HSA-354194	2019-01-15	0.0339617	0.102947	0.0554117	0.186414	3.80493	-12.8703	GRB2
Repression of WNT target genes_Homo sapiens_R-HSA-4641265	2019-01-14	0.0317332	0.102947	0.0520375	0.186414	4.07689	-14.0669	CTNNB1
Host Interactions of HIV factors_Homo sapiens_R-HSA-162909	2/129	0.0355225	0.104775	0.0784899	0.197449	-0.612728	2.04503	UBC;B2M
MAP3K8 (TPL2)-dependent MAPK1/3 activation_Homo sapiens_R-HSA-5684264	2019-01-16	0.0361853	0.104775	0.0587744	0.187949	2.27121	-7.53838	UBC
p75NTR signals via NF-kB_Homo sapiens_R-HSA-193639	2019-01-16	0.0361853	0.104775	0.0587744	0.187949	2.4429	-8.10825	UBC
TRAF6 mediated induction of TAK1 complex_Homo sapiens_R-HSA-937072	2019-01-16	0.0361853	0.104775	0.0587744	0.187949	2.50507	-8.31458	UBC
Translesion synthesis by REV1_Homo sapiens_R-HSA-110312	2019-01-16	0.0361853	0.104775	0.0587744	0.187949	2.56811	-8.52381	UBC
TGF-beta receptor signaling in EMT (epithelial to mesenchymal transition)_Homo sapiens_R-HSA-2173791	2019-01-16	0.0361853	0.104775	0.0587744	0.187949	2.61568	-8.68172	UBC
GRB2 events in ERBB2 signaling_Homo sapiens_R-HSA-1963640	2019-01-16	0.0361853	0.104775	0.0587744	0.187949	3.06955	-10.1881	GRB2
PI3K events in ERBB2 signaling_Homo sapiens_R-HSA-1963642	2019-01-16	0.0361853	0.104775	0.0587744	0.187949	3.17613	-10.5419	GRB2
Regulation of KIT signaling_Homo sapiens_R-HSA-1433559	2019-01-16	0.0361853	0.104775	0.0587744	0.187949	3.23726	-10.7448	GRB2
Cell-Cell communication_Homo sapiens_R-HSA-1500931	2/131	0.0365315	0.105254	0.0805649	0.198827	-0.404688	1.33935	CTNNB1;GRB2
Signaling by SCF-KIT_Homo sapiens_R-HSA-1433557	3/325	0.0386229	0.106299	0.109469	0.227524	-0.637476	2.07429	AKT3;UBC;GRB2
Signaling by ERBB4_Homo sapiens_R-HSA-1236394	3/330	0.0401218	0.106299	0.113233	0.228826	-0.620654	1.99592	AKT3;UBC;GRB2
Downstream signaling of activated FGFR2_Homo sapiens_R-HSA-5654696	3/329	0.0398197	0.106299	0.112476	0.228088	-0.618133	1.99249	AKT3;UBC;GRB2
Downstream signaling of activated FGFR3_Homo sapiens_R-HSA-5654708	3/329	0.0398197	0.106299	0.112476	0.228088	-0.609483	1.9646	AKT3;UBC;GRB2
Downstream signaling of activated FGFR4_Homo sapiens_R-HSA-5654716	3/329	0.0398197	0.106299	0.112476	0.228088	-0.599427	1.93219	AKT3;UBC;GRB2
Downstream signaling of activated FGFR1_Homo sapiens_R-HSA-5654687	3/332	0.0407296	0.106299	0.114754	0.229507	-0.52447	1.67872	AKT3;UBC;GRB2
Signaling by FGFR4_Homo sapiens_R-HSA-5654743	3/332	0.0407296	0.106299	0.114754	0.229507	-0.51515	1.64889	AKT3;UBC;GRB2
Activation of IRF3/IRF7 mediated by TBK1/IKK epsilon_Homo sapiens_R-HSA-936964	2019-01-18	0.0406174	0.106299	0.0654649	0.19146	2.34514	-7.51279	UBC
Translesion synthesis by POLI_Homo sapiens_R-HSA-5656121	2019-01-17	0.0384038	0.106299	0.0621254	0.1903	2.42841	-7.91565	UBC
Translesion synthesis by POLK_Homo sapiens_R-HSA-5655862	2019-01-17	0.0384038	0.106299	0.0621254	0.1903	2.5556	-8.33022	UBC
SHC-mediated cascade:FGFR3_Homo sapiens_R-HSA-5654704	2019-01-18	0.0406174	0.106299	0.0654649	0.19146	2.64746	-8.4813	GRB2
Oxygen-dependent proline hydroxylation of Hypoxia-inducible Factor Alpha_Homo sapiens_R-HSA-1234176	2019-01-18	0.0406174	0.106299	0.0654649	0.19146	2.88084	-9.22896	UBC
Tie2 Signaling_Homo sapiens_R-HSA-210993	2019-01-18	0.0406174	0.106299	0.0654649	0.19146	2.91609	-9.34185	GRB2
SHC1 events in ERBB2 signaling_Homo sapiens_R-HSA-1250196	2019-01-18	0.0406174	0.106299	0.0654649	0.19146	3.14173	-10.0647	GRB2
Signaling by cytosolic FGFR1 fusion mutants_Homo sapiens_R-HSA-1839117	2019-01-18	0.0406174	0.106299	0.0654649	0.19146	3.26926	-10.4733	GRB2
Norepinephrine Neurotransmitter Release Cycle_Homo sapiens_R-HSA-181430	2019-01-18	0.0406174	0.106299	0.0654649	0.19146	3.33421	-10.6813	VAMP2
Serotonin Neurotransmitter Release Cycle_Homo sapiens_R-HSA-181429	2019-01-18	0.0406174	0.106299	0.0654649	0.19146	3.35235	-10.7394	VAMP2
Acetylcholine Neurotransmitter Release Cycle_Homo sapiens_R-HSA-264642	2019-01-17	0.0384038	0.106299	0.0621254	0.1903	3.49433	-11.3901	VAMP2
Metabolism of porphyrins_Homo sapiens_R-HSA-189445	2019-01-17	0.0384038	0.106299	0.0621254	0.1903	3.65159	-11.9027	HMBS
Beta-catenin phosphorylation cascade_Homo sapiens_R-HSA-196299	2019-01-17	0.0384038	0.106299	0.0621254	0.1903	3.67333	-11.9736	CTNNB1
ABC transporters in lipid homeostasis_Homo sapiens_R-HSA-1369062	2019-01-17	0.0384038	0.106299	0.0621254	0.1903	4.30985	-14.0484	ABCG1
Signaling by FGFR3_Homo sapiens_R-HSA-5654741	3/333	0.0410353	0.106619	0.115517	0.230243	-0.519818	1.65995	AKT3;UBC;GRB2
Signaling by FGFR1_Homo sapiens_R-HSA-5654736	3/336	0.0419594	0.107434	0.117818	0.230876	-0.511036	1.62052	AKT3;UBC;GRB2
Regulation of TP53 Activity through Methylation_Homo sapiens_R-HSA-6804760	2019-01-19	0.042826	0.107434	0.0687929	0.193195	2.42084	-7.62713	UBC
Translesion Synthesis by POLH_Homo sapiens_R-HSA-110320	2019-01-19	0.042826	0.107434	0.0687929	0.193195	2.50937	-7.90604	UBC
TP53 Regulates Transcription of Genes Involved in Cytochrome C Release_Homo sapiens_R-HSA-6803204	2019-01-19	0.042826	0.107434	0.0687929	0.193195	3.33368	-10.5031	TP73
Defective B3GALT6 causes EDSP2 and SEMDJL1_Homo sapiens_R-HSA-4420332	2019-01-19	0.042826	0.107434	0.0687929	0.193195	3.64828	-11.4943	GPC1
Defective B3GAT3 causes JDSSDHD_Homo sapiens_R-HSA-3560801	2019-01-19	0.042826	0.107434	0.0687929	0.193195	3.66489	-11.5466	GPC1
Defective B4GALT7 causes EDS, progeroid type_Homo sapiens_R-HSA-3560783	2019-01-19	0.042826	0.107434	0.0687929	0.193195	3.68633	-11.6142	GPC1
GABA synthesis, release, reuptake and degradation_Homo sapiens_R-HSA-888590	2019-01-19	0.042826	0.107434	0.0687929	0.193195	3.94146	-12.418	VAMP2
Beta-catenin independent WNT signaling_Homo sapiens_R-HSA-3858494	2/144	0.0433545	0.108293	0.0944597	0.213913	-0.293225	0.92024	UBC;CTNNB1
Regulation of gene expression in beta cells_Homo sapiens_R-HSA-210745	2019-01-20	0.0450296	0.11152	0.0721094	0.193399	3.1792	-9.85691	AKT3
Synthesis, secretion, and inactivation of Glucagon-like Peptide-1 (GLP-1)_Homo sapiens_R-HSA-381771	2019-01-20	0.0450296	0.11152	0.0721094	0.193399	3.392	-10.5167	CTNNB1
Translation_Homo sapiens_R-HSA-72766	2/151	0.0472107	0.114053	0.102214	0.223641	-0.167208	0.510507	EEF1G;RPL13A
NOTCH2 Activation and Transmission of Signal to the Nucleus_Homo sapiens_R-HSA-2979096	2019-01-21	0.0472282	0.114053	0.0754144	0.195072	2.54218	-7.76067	UBC
Regulation of FZD by ubiquitination_Homo sapiens_R-HSA-4641263	2019-01-21	0.0472282	0.114053	0.0754144	0.195072	2.59452	-7.92046	UBC
SHC-mediated cascade:FGFR1_Homo sapiens_R-HSA-5654688	2019-01-21	0.0472282	0.114053	0.0754144	0.195072	2.6491	-8.08709	GRB2
HS-GAG degradation_Homo sapiens_R-HSA-2024096	2019-01-21	0.0472282	0.114053	0.0754144	0.195072	3.49952	-10.6832	GPC1
Nef-mediates down modulation of cell surface receptors by recruiting them to clathrin adapters_Homo sapiens_R-HSA-164938	2019-01-21	0.0472282	0.114053	0.0754144	0.195072	3.64279	-11.1206	B2M
Signaling by EGFR_Homo sapiens_R-HSA-177929	3/355	0.0480552	0.115571	0.132797	0.24968	-0.366388	1.11214	AKT3;UBC;GRB2
Signaling by FGFR3 in disease_Homo sapiens_R-HSA-5655332	2019-01-22	0.0494219	0.115982	0.078708	0.197449	2.4718	-7.43361	GRB2
CTLA4 inhibitory signaling_Homo sapiens_R-HSA-389513	2019-01-22	0.0494219	0.115982	0.078708	0.197449	2.47656	-7.4479	AKT3
Signaling by FGFR3 point mutants in cancer_Homo sapiens_R-HSA-8853338	2019-01-22	0.0494219	0.115982	0.078708	0.197449	2.4836	-7.46907	GRB2
Mitophagy_Homo sapiens_R-HSA-5205647	2019-01-22	0.0494219	0.115982	0.078708	0.197449	2.57181	-7.73435	UBC
Pink/Parkin Mediated Mitophagy_Homo sapiens_R-HSA-5205685	2019-01-22	0.0494219	0.115982	0.078708	0.197449	2.59553	-7.80568	UBC
CD28 dependent PI3K/Akt signaling_Homo sapiens_R-HSA-389357	2019-01-22	0.0494219	0.115982	0.078708	0.197449	2.60584	-7.83669	AKT3
Signaling by FGFR2_Homo sapiens_R-HSA-5654738	3/361	0.0500667	0.116793	0.137665	0.256799	-0.285214	0.854045	AKT3;UBC;GRB2
Signaling by FGFR_Homo sapiens_R-HSA-190236	3/366	0.0517743	0.116793	0.141771	0.259516	-0.206469	0.611325	AKT3;UBC;GRB2
Immunoregulatory interactions between a Lymphoid and a non-Lymphoid cell_Homo sapiens_R-HSA-198933	2/157	0.0506127	0.116793	0.108999	0.227524	-0.0310006	0.0924919	CD81;B2M
APC/C:Cdc20 mediated degradation of Cyclin B_Homo sapiens_R-HSA-174048	2019-01-23	0.0516106	0.116793	0.0819903	0.198827	2.40718	-7.13496	UBC
Downregulation of SMAD2/3:SMAD4 transcriptional activity_Homo sapiens_R-HSA-2173795	2019-01-23	0.0516106	0.116793	0.0819903	0.198827	2.44544	-7.24835	UBC
Gap-filling DNA repair synthesis and ligation in GG-NER_Homo sapiens_R-HSA-5696397	2019-01-23	0.0516106	0.116793	0.0819903	0.198827	2.63557	-7.8119	UBC
SHC-mediated cascade:FGFR4_Homo sapiens_R-HSA-5654719	2019-01-23	0.0516106	0.116793	0.0819903	0.198827	2.69752	-7.99553	GRB2
Dopamine Neurotransmitter Release Cycle_Homo sapiens_R-HSA-212676	2019-01-23	0.0516106	0.116793	0.0819903	0.198827	3.06609	-9.08799	VAMP2
Regulation of TP53 Activity through Acetylation_Homo sapiens_R-HSA-6804758	2019-01-23	0.0516106	0.116793	0.0819903	0.198827	3.09874	-9.18475	AKT3
Incretin synthesis, secretion, and inactivation_Homo sapiens_R-HSA-400508	2019-01-23	0.0516106	0.116793	0.0819903	0.198827	3.18068	-9.42762	CTNNB1
Cytokine Signaling in Immune system_Homo sapiens_R-HSA-1280215	4/620	0.0536038	0.119043	0.178023	0.283534	-0.100865	0.295145	UBC;GRB2;B2M;CRK
Role of LAT2/NTAL/LAB on calcium mobilization_Homo sapiens_R-HSA-2730905	2/162	0.0535137	0.119043	0.114745	0.229507	-0.0531566	0.155633	AKT3;GRB2
IKK complex recruitment mediated by RIP1_Homo sapiens_R-HSA-937041	2019-01-24	0.0537944	0.119043	0.0852613	0.204206	2.33223	-6.81613	UBC
Glutamate Neurotransmitter Release Cycle_Homo sapiens_R-HSA-210500	2019-01-24	0.0537944	0.119043	0.0852613	0.204206	3.07227	-8.97896	VAMP2
Insulin processing_Homo sapiens_R-HSA-264876	2019-01-24	0.0537944	0.119043	0.0852613	0.204206	3.40493	-9.9512	VAMP2
APC-Cdc20 mediated degradation of Nek2A_Homo sapiens_R-HSA-179409	2019-01-25	0.0559733	0.122468	0.0885209	0.208632	2.43216	-7.01164	UBC
Constitutive Signaling by AKT1 E17K in Cancer_Homo sapiens_R-HSA-5674400	2019-01-25	0.0559733	0.122468	0.0885209	0.208632	2.60094	-7.4982	AKT3
Antigen Presentation: Folding, assembly and peptide loading of class I MHC_Homo sapiens_R-HSA-983170	2019-01-25	0.0559733	0.122468	0.0885209	0.208632	3.0398	-8.76338	B2M
Downregulation of TGF-beta receptor signaling_Homo sapiens_R-HSA-2173788	2019-01-26	0.0581473	0.122615	0.0917693	0.208632	2.51303	-7.14901	UBC
SHC-mediated cascade:FGFR2_Homo sapiens_R-HSA-5654699	2019-01-26	0.0581473	0.122615	0.0917693	0.208632	2.58052	-7.341	GRB2
Cellular response to hypoxia_Homo sapiens_R-HSA-2262749	2019-01-26	0.0581473	0.122615	0.0917693	0.208632	2.63221	-7.48806	UBC
Regulation of Hypoxia-inducible Factor (HIF) by oxygen_Homo sapiens_R-HSA-1234174	2019-01-26	0.0581473	0.122615	0.0917693	0.208632	2.74914	-7.82069	UBC
PTK6 Regulates RHO GTPases, RAS GTPase and MAP kinases_Homo sapiens_R-HSA-8849471	2019-01-26	0.0581473	0.122615	0.0917693	0.208632	2.91325	-8.28754	CRK
Attenuation phase_Homo sapiens_R-HSA-3371568	2019-01-26	0.0581473	0.122615	0.0917693	0.208632	2.96766	-8.44232	HSPA1B
Fertilization_Homo sapiens_R-HSA-1187000	2019-01-26	0.0581473	0.122615	0.0917693	0.208632	3.04138	-8.65203	CD9
Diseases associated with glycosaminoglycan metabolism_Homo sapiens_R-HSA-3560782	2019-01-26	0.0581473	0.122615	0.0917693	0.208632	3.05883	-8.70168	GPC1
Reproduction_Homo sapiens_R-HSA-1474165	2019-01-26	0.0581473	0.122615	0.0917693	0.208632	3.08709	-8.78208	CD9
A tetrasaccharide linker sequence is required for GAG synthesis_Homo sapiens_R-HSA-1971475	2019-01-26	0.0581473	0.122615	0.0917693	0.208632	3.19518	-9.08958	GPC1
RNA Polymerase III Transcription Initiation From Type 2 Promoter_Homo sapiens_R-HSA-76066	2019-01-27	0.0603164	0.12673	0.0950065	0.214317	3.23388	-9.08123	TBP
Signaling by Interleukins_Homo sapiens_R-HSA-449147	3/392	0.0611055	0.127926	0.163783	0.279176	-0.0146913	0.0410643	UBC;GRB2;CRK
Fc epsilon receptor (FCERI) signaling_Homo sapiens_R-HSA-2454202	3/395	0.0622301	0.128041	0.16639	0.279176	0.0260524	-0.0723454	AKT3;UBC;GRB2
Immune System_Homo sapiens_R-HSA-168256	7/1547	0.0617568	0.128041	0.309286	0.344836	0.123194	-0.34304	CD81;AKT3;UBC;CTNNB1;GRB2;B2M;CRK
Recognition of DNA damage by PCNA-containing replication complex_Homo sapiens_R-HSA-110314	2019-01-28	0.0624806	0.128041	0.0982325	0.218211	2.32367	-6.4433	UBC
RNA Polymerase III Transcription Initiation From Type 3 Promoter_Homo sapiens_R-HSA-76071	2019-01-28	0.0624806	0.128041	0.0982325	0.218211	3.03105	-8.40479	TBP
The role of Nef in HIV-1 replication and disease pathogenesis_Homo sapiens_R-HSA-164952	2019-01-28	0.0624806	0.128041	0.0982325	0.218211	3.06057	-8.48665	B2M
RNA Polymerase III Transcription Initiation From Type 1 Promoter_Homo sapiens_R-HSA-76061	2019-01-28	0.0624806	0.128041	0.0982325	0.218211	3.09482	-8.58164	TBP
Metabolism of lipids and lipoproteins_Homo sapiens_R-HSA-556833	4/659	0.0642218	0.130626	0.206561	0.289922	0.0384641	-0.1056	SCARB1;SCD;CPNE3;ABCG1
HSF1 activation_Homo sapiens_R-HSA-3371511	2019-01-29	0.0646399	0.130626	0.101447	0.222801	2.81397	-7.70724	HSPA1B
CDO in myogenesis_Homo sapiens_R-HSA-375170	2019-01-29	0.0646399	0.130626	0.101447	0.222801	3.08776	-8.45714	CTNNB1
Myogenesis_Homo sapiens_R-HSA-525793	2019-01-29	0.0646399	0.130626	0.101447	0.222801	3.1241	-8.55667	CTNNB1
Activated NOTCH1 Transmits Signal to the Nucleus_Homo sapiens_R-HSA-2122948	2019-01-30	0.0667943	0.133589	0.104651	0.22642	2.38421	-6.45199	UBC
Termination of translesion DNA synthesis_Homo sapiens_R-HSA-5656169	2019-01-30	0.0667943	0.133589	0.104651	0.22642	2.41144	-6.52569	UBC
RNA Polymerase I Promoter Escape_Homo sapiens_R-HSA-73772	2019-01-30	0.0667943	0.133589	0.104651	0.22642	3.06161	-8.28515	TBP
FGFR1 mutant receptor activation_Homo sapiens_R-HSA-1839124	2019-01-31	0.0689439	0.135102	0.107844	0.227524	2.32636	-6.22177	GRB2
Regulation of TNFR1 signaling_Homo sapiens_R-HSA-5357905	2019-01-31	0.0689439	0.135102	0.107844	0.227524	2.42229	-6.47833	UBC
Packaging Of Telomere Ends_Homo sapiens_R-HSA-171306	2019-01-31	0.0689439	0.135102	0.107844	0.227524	2.73543	-7.3158	HIST2H2AA3
HS-GAG biosynthesis_Homo sapiens_R-HSA-2022928	2019-01-31	0.0689439	0.135102	0.107844	0.227524	2.74086	-7.33033	GPC1
Adherens junctions interactions_Homo sapiens_R-HSA-418990	2019-01-31	0.0689439	0.135102	0.107844	0.227524	2.79315	-7.47018	CTNNB1
Disassembly of the destruction complex and recruitment of AXIN to the membrane_Homo sapiens_R-HSA-4641262	2019-01-31	0.0689439	0.135102	0.107844	0.227524	2.82268	-7.54916	CTNNB1
Oncogene Induced Senescence_Homo sapiens_R-HSA-2559585	1932-01-01	0.0710887	0.136097	0.111025	0.227524	2.20098	-5.81902	UBC
Signaling by NOTCH2_Homo sapiens_R-HSA-1980145	1932-01-01	0.0710887	0.136097	0.111025	0.227524	2.33749	-6.17991	UBC
SMAD2/SMAD3:SMAD4 heterotrimer regulates transcription_Homo sapiens_R-HSA-2173796	1932-01-01	0.0710887	0.136097	0.111025	0.227524	2.36198	-6.24466	UBC
TGF-beta receptor signaling activates SMADs_Homo sapiens_R-HSA-2173789	1932-01-01	0.0710887	0.136097	0.111025	0.227524	2.37871	-6.2889	UBC
Regulation of beta-cell development_Homo sapiens_R-HSA-186712	1932-01-01	0.0710887	0.136097	0.111025	0.227524	2.73818	-7.23927	AKT3
Signaling by Robo receptor_Homo sapiens_R-HSA-376176	1932-01-01	0.0710887	0.136097	0.111025	0.227524	2.81009	-7.42939	GPC1
RNA Polymerase I Transcription Termination_Homo sapiens_R-HSA-73863	1932-01-01	0.0710887	0.136097	0.111025	0.227524	2.90624	-7.6836	TBP
Interferon Signaling_Homo sapiens_R-HSA-913531	2/196	0.0747012	0.141947	0.155688	0.270478	0.415046	-1.07674	UBC;B2M
Negative regulators of RIG-I/MDA5 signaling_Homo sapiens_R-HSA-936440	1934-01-01	0.0753637	0.141947	0.117356	0.230747	2.27992	-5.89456	UBC
Signaling by WNT in cancer_Homo sapiens_R-HSA-4791275	1934-01-01	0.0753637	0.141947	0.117356	0.230747	2.54175	-6.57151	CTNNB1
EPHA-mediated growth cone collapse_Homo sapiens_R-HSA-3928663	1934-01-01	0.0753637	0.141947	0.117356	0.230747	2.54524	-6.58053	EPHA2
HSF1-dependent transactivation_Homo sapiens_R-HSA-3371571	1934-01-01	0.0753637	0.141947	0.117356	0.230747	2.57511	-6.65777	HSPA1B
Fanconi Anemia Pathway_Homo sapiens_R-HSA-6783310	1935-01-01	0.077494	0.145021	0.120505	0.234561	2.19493	-5.61366	UBC
Lysosome Vesicle Biogenesis_Homo sapiens_R-HSA-432720	1935-01-01	0.077494	0.145021	0.120505	0.234561	2.60757	-6.669	VAMP2
RHO GTPases Activate WASPs and WAVEs_Homo sapiens_R-HSA-5663213	1936-01-01	0.0796195	0.148046	0.123642	0.23907	2.52104	-6.37948	GRB2
RNA Polymerase III Transcription Initiation_Homo sapiens_R-HSA-76046	1936-01-01	0.0796195	0.148046	0.123642	0.23907	2.5235	-6.38571	TBP
Translesion synthesis by Y family DNA polymerases bypasses lesions on DNA template_Homo sapiens_R-HSA-110313	1937-01-01	0.0817402	0.151025	0.12677	0.243498	2.05614	-5.14901	UBC
Apoptotic cleavage of cellular proteins_Homo sapiens_R-HSA-111465	1937-01-01	0.0817402	0.151025	0.12677	0.243498	2.77803	-6.95678	CTNNB1
Cyclin D associated events in G1_Homo sapiens_R-HSA-69231	1938-01-01	0.0838561	0.152991	0.129886	0.246233	2.01395	-4.99187	UBC
Signaling by FGFR1 in disease_Homo sapiens_R-HSA-5655302	1938-01-01	0.0838561	0.152991	0.129886	0.246233	2.01528	-4.99519	GRB2
G1 Phase_Homo sapiens_R-HSA-69236	1938-01-01	0.0838561	0.152991	0.129886	0.246233	2.04291	-5.06366	UBC
DNA Damage Recognition in GG-NER_Homo sapiens_R-HSA-5696394	1938-01-01	0.0838561	0.152991	0.129886	0.246233	2.2298	-5.5269	UBC
Dual Incision in GG-NER_Homo sapiens_R-HSA-5696400	1939-01-01	0.0859672	0.156353	0.132991	0.24968	2.11951	-5.20084	UBC
Negative regulation of MAPK pathway_Homo sapiens_R-HSA-5675221	1940-01-01	0.0880736	0.159685	0.136086	0.254669	1.90488	-4.62807	UBC
Cell Cycle, Mitotic_Homo sapiens_R-HSA-69278	3/462	0.0897952	0.161483	0.227565	0.297685	0.430893	-1.03855	HIST2H2AA3;H3F3A;UBC
TNF signaling_Homo sapiens_R-HSA-75893	1941-01-01	0.0901752	0.161483	0.13917	0.257133	2.09486	-5.04024	UBC
RNA Polymerase III Abortive And Retractive Initiation_Homo sapiens_R-HSA-749476	1941-01-01	0.0901752	0.161483	0.13917	0.257133	2.31239	-5.56361	TBP
RNA Polymerase III Transcription_Homo sapiens_R-HSA-74158	1941-01-01	0.0901752	0.161483	0.13917	0.257133	2.32463	-5.59307	TBP
Activation of gene expression by SREBF (SREBP)_Homo sapiens_R-HSA-2426168	1942-01-01	0.0922721	0.163727	0.142243	0.259516	2.24873	-5.35876	SCD
Retinoid metabolism and transport_Homo sapiens_R-HSA-975634	1942-01-01	0.0922721	0.163727	0.142243	0.259516	2.28048	-5.43441	GPC1
Fatty Acyl-CoA Biosynthesis_Homo sapiens_R-HSA-75105	1942-01-01	0.0922721	0.163727	0.142243	0.259516	2.50729	-5.97491	SCD
Signaling by FGFR2 in disease_Homo sapiens_R-HSA-5655253	1943-01-01	0.0943643	0.16559	0.145306	0.26165	1.83437	-4.3302	GRB2
Formation of Incision Complex in GG-NER_Homo sapiens_R-HSA-5696395	1943-01-01	0.0943643	0.16559	0.145306	0.26165	1.91201	-4.51348	UBC
Transcriptional activity of SMAD2/SMAD3:SMAD4 heterotrimer_Homo sapiens_R-HSA-2173793	1944-01-01	0.0964517	0.16559	0.148358	0.26165	2.00651	-4.69265	UBC
HIV Transcription Initiation_Homo sapiens_R-HSA-167161	1944-01-01	0.0964517	0.16559	0.148358	0.26165	2.05206	-4.79918	TBP
Interleukin-1 signaling_Homo sapiens_R-HSA-446652	1944-01-01	0.0964517	0.16559	0.148358	0.26165	2.07449	-4.85165	UBC
RNA Polymerase II HIV Promoter Escape_Homo sapiens_R-HSA-167162	1944-01-01	0.0964517	0.16559	0.148358	0.26165	2.08287	-4.87124	TBP
RNA Polymerase II Promoter Escape_Homo sapiens_R-HSA-73776	1944-01-01	0.0964517	0.16559	0.148358	0.26165	2.08734	-4.88169	TBP
RNA Polymerase II Transcription Initiation And Promoter Clearance_Homo sapiens_R-HSA-76042	1944-01-01	0.0964517	0.16559	0.148358	0.26165	2.0983	-4.90732	TBP
RNA Polymerase II Transcription Initiation_Homo sapiens_R-HSA-75953	1944-01-01	0.0964517	0.16559	0.148358	0.26165	2.11761	-4.95248	TBP
RNA Polymerase II Transcription Pre-Initiation And Promoter Opening_Homo sapiens_R-HSA-73779	1944-01-01	0.0964517	0.16559	0.148358	0.26165	2.12135	-4.96122	TBP
TP53 Regulates Transcription of Cell Death Genes_Homo sapiens_R-HSA-5633008	1943-01-01	0.0943643	0.16559	0.145306	0.26165	2.12683	-5.02058	TP73
RMTs methylate histone arginines_Homo sapiens_R-HSA-3214858	1945-01-01	0.0985345	0.167681	0.1514	0.264609	2.1517	-4.98624	HIST2H2AA3
Diseases of metabolism_Homo sapiens_R-HSA-5668914	1945-01-01	0.0985345	0.167681	0.1514	0.264609	2.20377	-5.10689	UBC
ABC-family proteins mediated transport_Homo sapiens_R-HSA-382556	1945-01-01	0.0985345	0.167681	0.1514	0.264609	2.35902	-5.46668	ABCG1
GRB2 events in EGFR signaling_Homo sapiens_R-HSA-179812	2/235	0.10169	0.168347	0.205535	0.289922	0.703186	-1.60736	UBC;GRB2
FRS-mediated FGFR1 signaling_Homo sapiens_R-HSA-5654693	2/236	0.102414	0.168347	0.20684	0.289922	0.709945	-1.61777	UBC;GRB2
RAF/MAP kinase cascade_Homo sapiens_R-HSA-5673001	2/235	0.10169	0.168347	0.205535	0.289922	0.711981	-1.62746	UBC;GRB2
FRS-mediated FGFR2 signaling_Homo sapiens_R-HSA-5654700	2/236	0.102414	0.168347	0.20684	0.289922	0.721224	-1.64347	UBC;GRB2
SHC1 events in EGFR signaling_Homo sapiens_R-HSA-180336	2/235	0.10169	0.168347	0.205535	0.289922	0.722162	-1.65074	UBC;GRB2
FRS-mediated FGFR3 signaling_Homo sapiens_R-HSA-5654706	2/236	0.102414	0.168347	0.20684	0.289922	0.730432	-1.66446	UBC;GRB2
SHC1 events in ERBB4 signaling_Homo sapiens_R-HSA-1250347	2/235	0.10169	0.168347	0.205535	0.289922	0.732133	-1.67353	UBC;GRB2
FRS-mediated FGFR4 signaling_Homo sapiens_R-HSA-5654712	2/236	0.102414	0.168347	0.20684	0.289922	0.739004	-1.68399	UBC;GRB2
SOS-mediated signalling_Homo sapiens_R-HSA-112412	2/235	0.10169	0.168347	0.205535	0.289922	0.739758	-1.69096	UBC;GRB2
DNA Damage Bypass_Homo sapiens_R-HSA-73893	1946-01-01	0.100613	0.168347	0.154431	0.269098	1.88137	-4.32052	UBC
Antigen activates B Cell Receptor (BCR) leading to generation of second messengers_Homo sapiens_R-HSA-983695	1947-01-01	0.102686	0.168347	0.157451	0.271115	2.06089	-4.69075	GRB2
NOTCH1 Intracellular Domain Regulates Transcription_Homo sapiens_R-HSA-2122947	1947-01-01	0.102686	0.168347	0.157451	0.271115	2.06977	-4.71096	UBC
RNA Polymerase I Transcription Initiation_Homo sapiens_R-HSA-73762	1947-01-01	0.102686	0.168347	0.157451	0.271115	2.30156	-5.23853	TBP
Signalling to p38 via RIT and RIN_Homo sapiens_R-HSA-187706	2/239	0.104596	0.170776	0.210762	0.293041	0.755403	-1.70544	UBC;GRB2
Death Receptor Signalling_Homo sapiens_R-HSA-73887	1948-01-01	0.104755	0.170776	0.160462	0.275483	2.06538	-4.65979	UBC
Frs2-mediated activation_Homo sapiens_R-HSA-170968	2/240	0.105326	0.171228	0.212071	0.293041	0.760457	-1.71156	UBC;GRB2
MAPK1/MAPK3 signaling_Homo sapiens_R-HSA-5684996	2/241	0.106057	0.171936	0.213381	0.293041	0.756346	-1.69707	UBC;GRB2
Regulation of activated PAK-2p34 by proteasome mediated degradation_Homo sapiens_R-HSA-211733	1949-01-01	0.106819	0.17269	0.163461	0.279176	2.0532	-4.59222	UBC
Signaling by Leptin_Homo sapiens_R-HSA-2586552	2/243	0.107524	0.17285	0.216004	0.293041	0.766012	-1.70824	UBC;GRB2
Interleukin receptor SHC signaling_Homo sapiens_R-HSA-912526	2/245	0.108997	0.17285	0.218631	0.295228	0.831968	-1.84401	UBC;GRB2
Ubiquitin-dependent degradation of Cyclin D1_Homo sapiens_R-HSA-69229	1950-01-01	0.108878	0.17285	0.166451	0.279176	2.04421	-4.5331	UBC
Ubiquitin-dependent degradation of Cyclin D_Homo sapiens_R-HSA-75815	1950-01-01	0.108878	0.17285	0.166451	0.279176	2.05974	-4.56754	UBC
Regulation of Apoptosis_Homo sapiens_R-HSA-169911	1950-01-01	0.108878	0.17285	0.166451	0.279176	2.05995	-4.56799	UBC
CDK-mediated phosphorylation and removal of Cdc6_Homo sapiens_R-HSA-69017	1950-01-01	0.108878	0.17285	0.166451	0.279176	2.07483	-4.60099	UBC
Chondroitin sulfate/dermatan sulfate metabolism_Homo sapiens_R-HSA-1793185	1950-01-01	0.108878	0.17285	0.166451	0.279176	2.43866	-5.40779	GPC1
Signalling to RAS_Homo sapiens_R-HSA-167044	2/246	0.109735	0.173068	0.219945	0.296315	0.797886	-1.76308	UBC;GRB2
VEGFR2 mediated cell proliferation_Homo sapiens_R-HSA-5218921	2/248	0.111216	0.173068	0.222576	0.297685	0.883365	-1.94012	UBC;GRB2
Autodegradation of the E3 ubiquitin ligase COP1_Homo sapiens_R-HSA-349425	1951-01-01	0.110933	0.173068	0.16943	0.280136	2.06361	-4.53753	UBC
Vpu mediated degradation of CD4_Homo sapiens_R-HSA-180534	1951-01-01	0.110933	0.173068	0.16943	0.280136	2.07575	-4.56422	UBC
Neurotransmitter Release Cycle_Homo sapiens_R-HSA-112310	1951-01-01	0.110933	0.173068	0.16943	0.280136	2.327	-5.11669	VAMP2
Metabolism of fat-soluble vitamins_Homo sapiens_R-HSA-6806667	1951-01-01	0.110933	0.173068	0.16943	0.280136	2.36357	-5.19708	GPC1
Apoptotic execution phase_Homo sapiens_R-HSA-75153	1951-01-01	0.110933	0.173068	0.16943	0.280136	2.47888	-5.45065	CTNNB1
p53-Independent DNA Damage Response_Homo sapiens_R-HSA-69610	1952-01-01	0.112983	0.173499	0.172398	0.281052	2.07405	-4.5225	UBC
p53-Independent G1/S DNA damage checkpoint_Homo sapiens_R-HSA-69613	1952-01-01	0.112983	0.173499	0.172398	0.281052	2.08384	-4.54385	UBC
Ubiquitin Mediated Degradation of Phosphorylated Cdc25A_Homo sapiens_R-HSA-69601	1952-01-01	0.112983	0.173499	0.172398	0.281052	2.09089	-4.55923	UBC
Deposition of new CENPA-containing nucleosomes at the centromere_Homo sapiens_R-HSA-606279	1952-01-01	0.112983	0.173499	0.172398	0.281052	2.23008	-4.86274	HIST2H2AA3
Nucleosome assembly_Homo sapiens_R-HSA-774815	1952-01-01	0.112983	0.173499	0.172398	0.281052	2.24192	-4.88855	HIST2H2AA3
Interleukin-2 signaling_Homo sapiens_R-HSA-451927	2/252	0.114193	0.174896	0.227848	0.297685	0.925486	-2.00818	UBC;GRB2
Generic Transcription Pathway_Homo sapiens_R-HSA-212436	4/812	0.11559	0.175152	0.328969	0.358841	0.849451	-1.83287	TBP;AKT3;UBC;TP73
AUF1 (hnRNP D0) binds and destabilizes mRNA_Homo sapiens_R-HSA-450408	1954-01-01	0.117069	0.175152	0.178305	0.283534	2.02376	-4.34094	UBC
Formation of TC-NER Pre-Incision Complex_Homo sapiens_R-HSA-6781823	1953-01-01	0.115028	0.175152	0.175357	0.283534	2.01972	-4.3678	UBC
Vif-mediated degradation of APOBEC3G_Homo sapiens_R-HSA-180585	1953-01-01	0.115028	0.175152	0.175357	0.283534	2.05949	-4.4538	UBC
Degradation of AXIN_Homo sapiens_R-HSA-4641257	1954-01-01	0.117069	0.175152	0.178305	0.283534	2.07683	-4.45478	UBC
SCF-beta-TrCP mediated degradation of Emi1_Homo sapiens_R-HSA-174113	1954-01-01	0.117069	0.175152	0.178305	0.283534	2.12495	-4.55799	UBC
Stabilization of p53_Homo sapiens_R-HSA-69541	1954-01-01	0.117069	0.175152	0.178305	0.283534	2.12617	-4.56061	UBC
Heparan sulfate/heparin (HS-GAG) metabolism_Homo sapiens_R-HSA-1638091	1954-01-01	0.117069	0.175152	0.178305	0.283534	2.33726	-5.0134	GPC1
Golgi Associated Vesicle Biogenesis_Homo sapiens_R-HSA-432722	1954-01-01	0.117069	0.175152	0.178305	0.283534	2.58065	-5.53546	VAMP2
Hh mutants that don't undergo autocatalytic processing are degraded by ERAD_Homo sapiens_R-HSA-5362768	1955-01-01	0.119105	0.177287	0.181243	0.286639	2.04776	-4.35712	UBC
Regulation of cholesterol biosynthesis by SREBP (SREBF)_Homo sapiens_R-HSA-1655829	1955-01-01	0.119105	0.177287	0.181243	0.286639	2.27733	-4.84558	SCD
Hh mutants abrogate ligand secretion_Homo sapiens_R-HSA-5387390	1957-01-01	0.123164	0.179653	0.187088	0.289588	2.03876	-4.26965	UBC
Constitutive Signaling by NOTCH1 HD+PEST Domain Mutants_Homo sapiens_R-HSA-2894862	1957-01-01	0.123164	0.179653	0.187088	0.289588	2.06658	-4.32792	UBC
Constitutive Signaling by NOTCH1 PEST Domain Mutants_Homo sapiens_R-HSA-2644606	1957-01-01	0.123164	0.179653	0.187088	0.289588	2.07913	-4.3542	UBC
Degradation of DVL_Homo sapiens_R-HSA-4641258	1956-01-01	0.121137	0.179653	0.18417	0.289588	2.08502	-4.40112	UBC
Signaling by NOTCH1 HD+PEST Domain Mutants in Cancer_Homo sapiens_R-HSA-2894858	1957-01-01	0.123164	0.179653	0.187088	0.289588	2.11586	-4.43111	UBC
Signaling by NOTCH1 in Cancer_Homo sapiens_R-HSA-2644603	1957-01-01	0.123164	0.179653	0.187088	0.289588	2.12654	-4.45349	UBC
Signaling by NOTCH1 PEST Domain Mutants in Cancer_Homo sapiens_R-HSA-2644602	1957-01-01	0.123164	0.179653	0.187088	0.289588	2.13561	-4.47248	UBC
Meiotic synapsis_Homo sapiens_R-HSA-1221632	1957-01-01	0.123164	0.179653	0.187088	0.289588	2.29807	-4.81271	HIST2H2AA3
NCAM signaling for neurite out-growth_Homo sapiens_R-HSA-375165	2/266	0.124775	0.180129	0.246374	0.313763	1.07486	-2.23704	UBC;GRB2
Degradation of GLI1 by the proteasome_Homo sapiens_R-HSA-5610780	1959-01-01	0.127204	0.180129	0.192893	0.289922	2.00793	-4.14026	UBC
Degradation of GLI2 by the proteasome_Homo sapiens_R-HSA-5610783	1959-01-01	0.127204	0.180129	0.192893	0.289922	2.0273	-4.1802	UBC
GLI3 is processed to GLI3R by the proteasome_Homo sapiens_R-HSA-5610785	1959-01-01	0.127204	0.180129	0.192893	0.289922	2.05237	-4.2319	UBC
The role of GTSE1 in G2/M progression after G2 checkpoint_Homo sapiens_R-HSA-8852276	1959-01-01	0.127204	0.180129	0.192893	0.289922	2.09538	-4.32059	UBC
CDT1 association with the CDC6:ORC:origin complex_Homo sapiens_R-HSA-68827	1958-01-01	0.125186	0.180129	0.189995	0.289922	2.09619	-4.35577	UBC
NIK-->noncanonical NF-kB signaling_Homo sapiens_R-HSA-5676590	1958-01-01	0.125186	0.180129	0.189995	0.289922	2.116	-4.39693	UBC
SCF(Skp2)-mediated degradation of p27/p21_Homo sapiens_R-HSA-187577	1959-01-01	0.127204	0.180129	0.192893	0.289922	2.13772	-4.4079	UBC
DNA Double Strand Break Response_Homo sapiens_R-HSA-5693606	1959-01-01	0.127204	0.180129	0.192893	0.289922	2.16851	-4.47139	UBC
Recruitment and ATM-mediated phosphorylation of repair and signaling proteins at DNA double strand breaks_Homo sapiens_R-HSA-5693565	1958-01-01	0.125186	0.180129	0.189995	0.289922	2.18144	-4.53292	UBC
DNA Damage/Telomere Stress Induced Senescence_Homo sapiens_R-HSA-2559586	1959-01-01	0.127204	0.180129	0.192893	0.289922	2.26355	-4.66736	HIST2H2AA3
Telomere Maintenance_Homo sapiens_R-HSA-157579	1959-01-01	0.127204	0.180129	0.192893	0.289922	2.39906	-4.94677	HIST2H2AA3
MAP kinase activation in TLR cascade_Homo sapiens_R-HSA-450294	1960-01-01	0.129218	0.182094	0.19578	0.289922	2.02909	-4.15204	UBC
HDACs deacetylate histones_Homo sapiens_R-HSA-3214815	1960-01-01	0.129218	0.182094	0.19578	0.289922	2.24033	-4.5843	HIST2H2AA3
Dectin-1 mediated noncanonical NF-kB signaling_Homo sapiens_R-HSA-5607761	1961-01-01	0.131227	0.182713	0.198657	0.289922	2.15696	-4.38042	UBC
Cell death signalling via NRAGE, NRIF and NADE_Homo sapiens_R-HSA-204998	1961-01-01	0.131227	0.182713	0.198657	0.289922	2.22331	-4.51517	UBC
Constitutive Signaling by Aberrant PI3K in Cancer_Homo sapiens_R-HSA-2219530	1961-01-01	0.131227	0.182713	0.198657	0.289922	2.26945	-4.60886	GRB2
Ca2+ pathway_Homo sapiens_R-HSA-4086398	1961-01-01	0.131227	0.182713	0.198657	0.289922	2.33888	-4.74987	CTNNB1
Cell-cell junction organization_Homo sapiens_R-HSA-421270	1961-01-01	0.131227	0.182713	0.198657	0.289922	2.38623	-4.84602	CTNNB1
Autodegradation of Cdh1 by Cdh1:APC/C_Homo sapiens_R-HSA-174084	1962-01-01	0.133231	0.184181	0.201525	0.289922	2.10652	-4.24605	UBC
Gap-filling DNA repair synthesis and ligation in TC-NER_Homo sapiens_R-HSA-6782210	1962-01-01	0.133231	0.184181	0.201525	0.289922	2.18919	-4.41269	UBC
FCERI mediated Ca+2 mobilization_Homo sapiens_R-HSA-2871809	1962-01-01	0.133231	0.184181	0.201525	0.289922	2.37111	-4.77939	GRB2
Asymmetric localization of PCP proteins_Homo sapiens_R-HSA-4608870	1963-01-01	0.135231	0.184319	0.204382	0.289922	2.13164	-4.26492	UBC
Dual incision in TC-NER_Homo sapiens_R-HSA-6782135	1963-01-01	0.135231	0.184319	0.204382	0.289922	2.13338	-4.26841	UBC
Signaling by FGFR in disease_Homo sapiens_R-HSA-1226099	1963-01-01	0.135231	0.184319	0.204382	0.289922	2.14758	-4.29683	GRB2
Circadian Clock_Homo sapiens_R-HSA-400253	1963-01-01	0.135231	0.184319	0.204382	0.289922	2.16844	-4.33856	UBC
p53-Dependent G1 DNA Damage Response_Homo sapiens_R-HSA-69563	1963-01-01	0.135231	0.184319	0.204382	0.289922	2.19294	-4.38758	UBC
p53-Dependent G1/S DNA damage checkpoint_Homo sapiens_R-HSA-69580	1963-01-01	0.135231	0.184319	0.204382	0.289922	2.20183	-4.40536	UBC
Metabolism of carbohydrates_Homo sapiens_R-HSA-71387	2/282	0.137149	0.185303	0.26764	0.321052	1.2292	-2.44204	GPC1;UBC
HDR through Homologous Recombination (HRR)_Homo sapiens_R-HSA-5685942	1964-01-01	0.137226	0.185303	0.20723	0.289922	2.10632	-4.18342	UBC
Hedgehog ligand biogenesis_Homo sapiens_R-HSA-5358346	1964-01-01	0.137226	0.185303	0.20723	0.289922	2.14156	-4.25341	UBC
RNA Polymerase II Pre-transcription Events_Homo sapiens_R-HSA-674695	1964-01-01	0.137226	0.185303	0.20723	0.289922	2.33599	-4.63958	TBP
MAPK family signaling cascades_Homo sapiens_R-HSA-5683057	2/284	0.138715	0.186428	0.270302	0.321052	1.39516	-2.75591	UBC;GRB2
IRS-mediated signalling_Homo sapiens_R-HSA-112399	2/284	0.138715	0.186428	0.270302	0.321052	1.41744	-2.79991	UBC;GRB2
Insulin receptor signalling cascade_Homo sapiens_R-HSA-74751	2/287	0.141071	0.186428	0.274295	0.322765	1.43343	-2.80736	UBC;GRB2
IGF1R signaling cascade_Homo sapiens_R-HSA-2428924	2/288	0.141859	0.186428	0.275626	0.322765	1.4538	-2.83915	UBC;GRB2
Cell Cycle_Homo sapiens_R-HSA-1640170	3/566	0.140761	0.186428	0.329356	0.358841	1.44944	-2.8419	HIST2H2AA3;H3F3A;UBC
IRS-related events triggered by IGF1R_Homo sapiens_R-HSA-2428928	2/288	0.141859	0.186428	0.275626	0.322765	1.46186	-2.8549	UBC;GRB2
Signaling by Type 1 Insulin-like Growth Factor 1 Receptor (IGF1R)_Homo sapiens_R-HSA-2404192	2/288	0.141859	0.186428	0.275626	0.322765	1.47187	-2.87445	UBC;GRB2
FCERI mediated MAPK activation_Homo sapiens_R-HSA-2871796	2/289	0.142647	0.186428	0.276957	0.323673	1.47934	-2.88085	UBC;GRB2
APC/C:Cdc20 mediated degradation of Securin_Homo sapiens_R-HSA-174154	1966-01-01	0.141203	0.186428	0.212895	0.293041	2.16952	-4.24696	UBC
Activation of NF-kappaB in B cells_Homo sapiens_R-HSA-1169091	1966-01-01	0.141203	0.186428	0.212895	0.293041	2.18928	-4.28563	UBC
Regulation of RAS by GAPs_Homo sapiens_R-HSA-5658442	1967-01-01	0.143185	0.186428	0.215713	0.293041	2.22176	-4.31825	UBC
G1/S DNA Damage Checkpoints_Homo sapiens_R-HSA-69615	1965-01-01	0.139217	0.186428	0.210067	0.293041	2.24446	-4.42546	UBC
Assembly of the pre-replicative complex_Homo sapiens_R-HSA-68867	1967-01-01	0.143185	0.186428	0.215713	0.293041	2.32734	-4.52347	UBC
Transcription of the HIV genome_Homo sapiens_R-HSA-167172	1967-01-01	0.143185	0.186428	0.215713	0.293041	2.43025	-4.72348	TBP
Triglyceride Biosynthesis_Homo sapiens_R-HSA-75109	1966-01-01	0.141203	0.186428	0.212895	0.293041	2.50665	-4.9069	SCD
Macroautophagy_Homo sapiens_R-HSA-1632852	1967-01-01	0.143185	0.186428	0.215713	0.293041	2.57384	-5.00256	CHMP4C
Cyclin E associated events during G1/S transition_Homo sapiens_R-HSA-69202	1968-01-01	0.145162	0.188581	0.218522	0.295228	2.23014	-4.30397	UBC
Cyclin A:Cdk2-associated events at S phase entry_Homo sapiens_R-HSA-69656	1969-01-01	0.147135	0.190718	0.22132	0.297479	2.23267	-4.2787	UBC
Orc1 removal from chromatin_Homo sapiens_R-HSA-68949	1970-01-01	0.149103	0.191563	0.224109	0.297685	2.3942	-4.55644	UBC
Switching of origins to a post-replicative state_Homo sapiens_R-HSA-69052	1970-01-01	0.149103	0.191563	0.224109	0.297685	2.40368	-4.57448	UBC
Clathrin derived vesicle budding_Homo sapiens_R-HSA-421837	1970-01-01	0.149103	0.191563	0.224109	0.297685	2.53539	-4.82513	VAMP2
trans-Golgi Network Vesicle Budding_Homo sapiens_R-HSA-199992	1970-01-01	0.149103	0.191563	0.224109	0.297685	2.56588	-4.88316	VAMP2
APC/C:Cdh1 mediated degradation of Cdc20 and other APC/C:Cdh1 targeted proteins in late mitosis/early G1_Homo sapiens_R-HSA-174178	1971-01-01	0.151067	0.193192	0.226888	0.297685	2.16026	-4.08295	UBC
APC:Cdc20 mediated degradation of cell cycle proteins prior to satisfation of the cell cycle checkpoint_Homo sapiens_R-HSA-179419	1972-01-01	0.153027	0.193192	0.229657	0.297685	2.21569	-4.15916	UBC
TRAF6 Mediated Induction of proinflammatory cytokines_Homo sapiens_R-HSA-168180	1972-01-01	0.153027	0.193192	0.229657	0.297685	2.24747	-4.21881	UBC
Cdc20:Phospho-APC/C mediated degradation of Cyclin A_Homo sapiens_R-HSA-174184	1971-01-01	0.151067	0.193192	0.226888	0.297685	2.23316	-4.22074	UBC
Antiviral mechanism by IFN-stimulated genes_Homo sapiens_R-HSA-1169410	1972-01-01	0.153027	0.193192	0.229657	0.297685	2.36101	-4.43196	UBC
ISG15 antiviral mechanism_Homo sapiens_R-HSA-1169408	1972-01-01	0.153027	0.193192	0.229657	0.297685	2.38253	-4.47235	UBC
Removal of licensing factors from origins_Homo sapiens_R-HSA-69300	1972-01-01	0.153027	0.193192	0.229657	0.297685	2.41299	-4.52954	UBC
Signaling by NOTCH1_Homo sapiens_R-HSA-1980143	1972-01-01	0.153027	0.193192	0.229657	0.297685	2.41584	-4.53488	UBC
Signaling by TGF-beta Receptor Complex_Homo sapiens_R-HSA-170834	1973-01-01	0.154982	0.195237	0.232417	0.300593	2.34832	-4.37833	UBC
Class I MHC mediated antigen processing & presentation_Homo sapiens_R-HSA-983169	2/305	0.15539	0.195328	0.298242	0.337698	1.54251	-2.87187	UBC;B2M
APC/C:Cdc20 mediated degradation of mitotic proteins_Homo sapiens_R-HSA-176409	1974-01-01	0.156932	0.196419	0.235167	0.302804	2.25799	-4.18166	UBC
Binding and Uptake of Ligands by Scavenger Receptors_Homo sapiens_R-HSA-2173782	1974-01-01	0.156932	0.196419	0.235167	0.302804	2.4526	-4.54208	SCARB1
Activation of APC/C and APC/C:Cdc20 mediated degradation of mitotic proteins_Homo sapiens_R-HSA-176814	1975-01-01	0.158879	0.198003	0.237908	0.304984	2.2277	-4.09812	UBC
Regulation of DNA replication_Homo sapiens_R-HSA-69304	1975-01-01	0.158879	0.198003	0.237908	0.304984	2.43759	-4.48423	UBC
Signaling by Insulin receptor_Homo sapiens_R-HSA-74752	2/311	0.160225	0.199254	0.306211	0.34272	1.74742	-3.19984	UBC;GRB2
Transcription-Coupled Nucleotide Excision Repair (TC-NER)_Homo sapiens_R-HSA-6781827	1976-01-01	0.160821	0.199568	0.240639	0.307807	2.34432	-4.28417	UBC
RNA polymerase II transcribes snRNA genes_Homo sapiens_R-HSA-6807505	1977-01-01	0.162758	0.201543	0.243361	0.310606	2.51189	-4.56032	TBP
Regulation of APC/C activators between G1/S and early anaphase_Homo sapiens_R-HSA-176408	1979-01-01	0.16662	0.204584	0.248776	0.314073	2.30637	-4.13311	UBC
PI3K Cascade_Homo sapiens_R-HSA-109704	1979-01-01	0.16662	0.204584	0.248776	0.314073	2.41238	-4.32308	GRB2
RIG-I/MDA5 mediated induction of IFN-alpha/beta pathways_Homo sapiens_R-HSA-168928	1979-01-01	0.16662	0.204584	0.248776	0.314073	2.41542	-4.32854	UBC
Glucose metabolism_Homo sapiens_R-HSA-70326	1979-01-01	0.16662	0.204584	0.248776	0.314073	2.42587	-4.34726	UBC
Regulation of insulin secretion_Homo sapiens_R-HSA-422356	1980-01-01	0.168544	0.206077	0.25147	0.316102	2.34365	-4.17301	VAMP2
Regulation of HSF1-mediated heat shock response_Homo sapiens_R-HSA-3371453	1980-01-01	0.168544	0.206077	0.25147	0.316102	2.3561	-4.19518	HSPA1B
DNA Replication Pre-Initiation_Homo sapiens_R-HSA-69002	1982-01-01	0.17238	0.207712	0.256829	0.31803	2.29925	-4.04221	UBC
M/G1 Transition_Homo sapiens_R-HSA-68874	1982-01-01	0.17238	0.207712	0.256829	0.31803	2.3236	-4.08502	UBC
Global Genome Nucleotide Excision Repair (GG-NER)_Homo sapiens_R-HSA-5696399	1982-01-01	0.17238	0.207712	0.256829	0.31803	2.33385	-4.10303	UBC
MyD88 cascade initiated on plasma membrane_Homo sapiens_R-HSA-975871	1982-01-01	0.17238	0.207712	0.256829	0.31803	2.3396	-4.11315	UBC
Toll Like Receptor 10 (TLR10) Cascade_Homo sapiens_R-HSA-168142	1982-01-01	0.17238	0.207712	0.256829	0.31803	2.34845	-4.12871	UBC
Toll Like Receptor 5 (TLR5) Cascade_Homo sapiens_R-HSA-168176	1982-01-01	0.17238	0.207712	0.256829	0.31803	2.3568	-4.14339	UBC
Processing of DNA double-strand break ends_Homo sapiens_R-HSA-5693607	1981-01-01	0.170464	0.207712	0.254154	0.31803	2.44111	-4.31888	UBC
TRAF6 mediated induction of NFkB and MAP kinases upon TLR7/8 or 9 activation_Homo sapiens_R-HSA-975138	1983-01-01	0.174291	0.208719	0.259494	0.319293	2.33763	-4.0839	UBC
p75 NTR receptor-mediated signalling_Homo sapiens_R-HSA-193704	1983-01-01	0.174291	0.208719	0.259494	0.319293	2.36374	-4.12952	UBC
PI5P, PP2A and IER3 Regulate PI3K/AKT Signaling_Homo sapiens_R-HSA-6811558	1983-01-01	0.174291	0.208719	0.259494	0.319293	2.55808	-4.46904	GRB2
Viral mRNA Translation_Homo sapiens_R-HSA-192823	1984-01-01	0.176198	0.209708	0.26215	0.320399	2.40502	-4.17546	RPL13A
Peptide chain elongation_Homo sapiens_R-HSA-156902	1984-01-01	0.176198	0.209708	0.26215	0.320399	2.41727	-4.19673	RPL13A
TP53 Regulates Metabolic Genes_Homo sapiens_R-HSA-5628897	1984-01-01	0.176198	0.209708	0.26215	0.320399	2.47671	-4.29994	AKT3
Hedgehog 'on' state_Homo sapiens_R-HSA-5632684	1985-01-01	0.178101	0.209828	0.264797	0.320399	2.21681	-3.8249	UBC
APC/C-mediated degradation of cell cycle proteins_Homo sapiens_R-HSA-174143	1985-01-01	0.178101	0.209828	0.264797	0.320399	2.26537	-3.90868	UBC
Regulation of mitotic cell cycle_Homo sapiens_R-HSA-453276	1985-01-01	0.178101	0.209828	0.264797	0.320399	2.29182	-3.95431	UBC
MyD88 dependent cascade initiated on endosome_Homo sapiens_R-HSA-975155	1985-01-01	0.178101	0.209828	0.264797	0.320399	2.31666	-3.99718	UBC
Toll Like Receptor 7/8 (TLR7/8) Cascade_Homo sapiens_R-HSA-168181	1985-01-01	0.178101	0.209828	0.264797	0.320399	2.33912	-4.03593	UBC
Regulation of mRNA stability by proteins that bind AU-rich elements_Homo sapiens_R-HSA-450531	1986-01-01	0.179999	0.210784	0.267435	0.321052	2.41091	-4.13424	UBC
Chromosome Maintenance_Homo sapiens_R-HSA-73886	1986-01-01	0.179999	0.210784	0.267435	0.321052	2.42404	-4.15675	HIST2H2AA3
Cell junction organization_Homo sapiens_R-HSA-446728	1986-01-01	0.179999	0.210784	0.267435	0.321052	2.49512	-4.27864	CTNNB1
Eukaryotic Translation Termination_Homo sapiens_R-HSA-72764	1987-01-01	0.181894	0.211724	0.270064	0.321052	2.37762	-4.05225	RPL13A
Selenocysteine synthesis_Homo sapiens_R-HSA-2408557	1987-01-01	0.181894	0.211724	0.270064	0.321052	2.39922	-4.08907	RPL13A
Regulation of PLK1 Activity at G2/M Transition_Homo sapiens_R-HSA-2565942	1987-01-01	0.181894	0.211724	0.270064	0.321052	2.47909	-4.22519	UBC
Toll Like Receptor 9 (TLR9) Cascade_Homo sapiens_R-HSA-168138	1988-01-01	0.183784	0.213072	0.272683	0.322564	2.36059	-3.99883	UBC
Diseases of glycosylation_Homo sapiens_R-HSA-3781865	1988-01-01	0.183784	0.213072	0.272683	0.322564	2.46642	-4.17811	GPC1
Nonsense Mediated Decay (NMD) independent of the Exon Junction Complex (EJC)_Homo sapiens_R-HSA-975956	1989-01-01	0.185669	0.21483	0.275294	0.322765	2.40761	-4.0539	RPL13A
MAPK6/MAPK4 signaling_Homo sapiens_R-HSA-5687128	1992-01-01	0.1913	0.218736	0.28307	0.326879	2.22649	-3.68241	UBC
PCP/CE pathway_Homo sapiens_R-HSA-4086400	1991-01-01	0.189428	0.218736	0.280487	0.326879	2.34707	-3.90494	UBC
MyD88:Mal cascade initiated on plasma membrane_Homo sapiens_R-HSA-166058	1992-01-01	0.1913	0.218736	0.28307	0.326879	2.36382	-3.90955	UBC
Toll Like Receptor 2 (TLR2) Cascade_Homo sapiens_R-HSA-181438	1992-01-01	0.1913	0.218736	0.28307	0.326879	2.37076	-3.92103	UBC
Toll Like Receptor TLR1:TLR2 Cascade_Homo sapiens_R-HSA-168179	1992-01-01	0.1913	0.218736	0.28307	0.326879	2.38121	-3.93831	UBC
Toll Like Receptor TLR6:TLR2 Cascade_Homo sapiens_R-HSA-168188	1992-01-01	0.1913	0.218736	0.28307	0.326879	2.38661	-3.94723	UBC
Interferon gamma signaling_Homo sapiens_R-HSA-877300	1993-01-01	0.193169	0.22044	0.285645	0.329198	2.47845	-4.07505	B2M
TNFR2 non-canonical NF-kB pathway_Homo sapiens_R-HSA-5668541	1995-01-01	0.196894	0.224251	0.290766	0.334439	2.41859	-3.93043	UBC
Signal Transduction_Homo sapiens_R-HSA-162582	2465-08-01	0.199895	0.224952	0.686991	0.690551	2.1024	-3.38479	HIST2H2AA3;GPC1;AKT3;H3F3A;UBC;CTNNB1;GRB2;CRK
MyD88-independent TLR3/TLR4 cascade_Homo sapiens_R-HSA-166166	1997-01-01	0.200601	0.224952	0.295852	0.335645	2.28989	-3.67856	UBC
Toll Like Receptor 3 (TLR3) Cascade_Homo sapiens_R-HSA-168164	1997-01-01	0.200601	0.224952	0.295852	0.335645	2.3074	-3.70669	UBC
TRIF-mediated TLR3/TLR4 signaling_Homo sapiens_R-HSA-937061	1997-01-01	0.200601	0.224952	0.295852	0.335645	2.31671	-3.72164	UBC
Formation of a pool of free 40S subunits_Homo sapiens_R-HSA-72689	1996-01-01	0.198749	0.224952	0.293314	0.335645	2.3471	-3.79223	RPL13A
Cellular response to heat stress_Homo sapiens_R-HSA-3371556	1996-01-01	0.198749	0.224952	0.293314	0.335645	2.43698	-3.93745	HSPA1B
Visual phototransduction_Homo sapiens_R-HSA-2187338	1997-01-01	0.200601	0.224952	0.295852	0.335645	2.45108	-3.9375	GPC1
Synthesis of DNA_Homo sapiens_R-HSA-69239	1997-01-01	0.200601	0.224952	0.295852	0.335645	2.49732	-4.01179	UBC
Hedgehog 'off' state_Homo sapiens_R-HSA-5610787	1999-01-01	0.204292	0.227774	0.300903	0.338734	2.25675	-3.58418	UBC
CLEC7A (Dectin-1) signaling_Homo sapiens_R-HSA-5607764	1999-01-01	0.204292	0.227774	0.300903	0.338734	2.30125	-3.65485	UBC
Downstream TCR signaling_Homo sapiens_R-HSA-202424	1999-01-01	0.204292	0.227774	0.300903	0.338734	2.34418	-3.72303	UBC
Stimuli-sensing channels_Homo sapiens_R-HSA-2672351	1/100	0.206131	0.229385	0.303415	0.340903	2.48048	-3.91727	UBC
Cell surface interactions at the vascular wall_Homo sapiens_R-HSA-202733	1/101	0.207967	0.230986	0.305919	0.34272	2.3802	-3.73782	GRB2
Glycerophospholipid biosynthesis_Homo sapiens_R-HSA-1483206	1/102	0.209797	0.232575	0.308414	0.344523	2.39817	-3.74501	CPNE3
DNA Replication_Homo sapiens_R-HSA-69306	1/105	0.215265	0.238183	0.315846	0.351476	2.47957	-3.80833	UBC
3' -UTR-mediated translational regulation_Homo sapiens_R-HSA-157279	1/106	0.21708	0.238378	0.318306	0.351526	2.36184	-3.60769	RPL13A
L13a-mediated translational silencing of Ceruloplasmin expression_Homo sapiens_R-HSA-156827	1/106	0.21708	0.238378	0.318306	0.351526	2.36665	-3.61503	RPL13A
Nonsense Mediated Decay (NMD) enhanced by the Exon Junction Complex (EJC)_Homo sapiens_R-HSA-975957	1/106	0.21708	0.238378	0.318306	0.351526	2.41353	-3.68664	RPL13A
Nonsense-Mediated Decay (NMD)_Homo sapiens_R-HSA-927802	1/106	0.21708	0.238378	0.318306	0.351526	2.42266	-3.70059	RPL13A
GTP hydrolysis and joining of the 60S ribosomal subunit_Homo sapiens_R-HSA-72706	1/107	0.21889	0.239013	0.320757	0.352228	2.3352	-3.5476	RPL13A
SRP-dependent cotranslational protein targeting to membrane_Homo sapiens_R-HSA-1799339	1/107	0.21889	0.239013	0.320757	0.352228	2.3788	-3.61384	RPL13A
HATs acetylate histones_Homo sapiens_R-HSA-3214847	1/107	0.21889	0.239013	0.320757	0.352228	2.407	-3.65668	HIST2H2AA3
Nucleotide Excision Repair_Homo sapiens_R-HSA-5696398	1/108	0.220696	0.240534	0.3232	0.354242	2.3555	-3.55908	UBC
Integration of energy metabolism_Homo sapiens_R-HSA-163685	1/110	0.224297	0.244001	0.328061	0.358841	2.34737	-3.50882	VAMP2
FCERI mediated NF-kB activation_Homo sapiens_R-HSA-2871837	1/111	0.226091	0.245037	0.330479	0.358841	2.32455	-3.45619	UBC
Selenoamino acid metabolism_Homo sapiens_R-HSA-2408522	1/111	0.226091	0.245037	0.330479	0.358841	2.35214	-3.49721	RPL13A
Activated TLR4 signalling_Homo sapiens_R-HSA-166054	1/112	0.22788	0.245604	0.332888	0.359445	2.40558	-3.5577	UBC
HDR through Homologous Recombination (HR) or Single Strand Annealing (SSA)_Homo sapiens_R-HSA-5693567	1/112	0.22788	0.245604	0.332888	0.359445	2.41618	-3.57337	UBC
G1/S Transition_Homo sapiens_R-HSA-69206	1/112	0.22788	0.245604	0.332888	0.359445	2.46141	-3.64026	UBC
Cap-dependent Translation Initiation_Homo sapiens_R-HSA-72737	1/114	0.231448	0.248529	0.337681	0.363272	2.33754	-3.42075	RPL13A
Eukaryotic Translation Initiation_Homo sapiens_R-HSA-72613	1/114	0.231448	0.248529	0.337681	0.363272	2.34611	-3.43329	RPL13A
Homology Directed Repair_Homo sapiens_R-HSA-5693538	1/118	0.238535	0.255198	0.347167	0.372102	2.42545	-3.47625	UBC
TCR signaling_Homo sapiens_R-HSA-202403	1/118	0.238535	0.255198	0.347167	0.372102	2.45892	-3.52421	UBC
Glycosaminoglycan metabolism_Homo sapiens_R-HSA-1630316	1/121	0.243809	0.260361	0.354196	0.378937	2.38617	-3.36778	GPC1
Signaling by NOTCH_Homo sapiens_R-HSA-157118	1/122	0.245558	0.261271	0.356522	0.380029	2.34838	-3.29764	UBC
Toll Like Receptor 4 (TLR4) Cascade_Homo sapiens_R-HSA-166016	1/122	0.245558	0.261271	0.356522	0.380029	2.3911	-3.35764	UBC
C-type lectin receptors (CLRs)_Homo sapiens_R-HSA-5621481	1/123	0.247304	0.262648	0.35884	0.381801	2.41236	-3.37039	UBC
RNA Polymerase II Transcription_Homo sapiens_R-HSA-73857	1/124	0.249046	0.263536	0.361151	0.382859	2.40865	-3.34831	TBP
S Phase_Homo sapiens_R-HSA-69242	1/124	0.249046	0.263536	0.361151	0.382859	2.51988	-3.50293	UBC
Influenza Viral RNA Transcription and Replication_Homo sapiens_R-HSA-168273	1/128	0.255974	0.270376	0.370311	0.391857	2.40503	-3.27728	RPL13A
Gastrin-CREB signalling pathway via PKC and MAPK_Homo sapiens_R-HSA-881907	2/432	0.261834	0.276064	0.460927	0.476482	2.49429	-3.34246	UBC;GRB2
Signaling by Hedgehog_Homo sapiens_R-HSA-5358351	1/136	0.269644	0.282762	0.388252	0.408612	2.29873	-3.01284	UBC
Influenza Life Cycle_Homo sapiens_R-HSA-168255	1/136	0.269644	0.282762	0.388252	0.408612	2.39778	-3.14266	RPL13A
Mitotic G1-G1/S phases_Homo sapiens_R-HSA-453279	1/136	0.269644	0.282762	0.388252	0.408612	2.41775	-3.16883	UBC
Toll-Like Receptors Cascades_Homo sapiens_R-HSA-168898	1/140	0.276386	0.289311	0.397036	0.417103	2.46745	-3.17303	UBC
Factors involved in megakaryocyte development and platelet production_Homo sapiens_R-HSA-983231	1/141	0.278062	0.290543	0.399213	0.418634	2.4262	-3.10531	H3F3A
DNA Double-Strand Break Repair_Homo sapiens_R-HSA-5693532	1/145	0.284729	0.296975	0.407844	0.426916	2.45077	-3.07871	UBC
Influenza Infection_Homo sapiens_R-HSA-168254	1/147	0.288039	0.299891	0.412114	0.430611	2.4145	-3.00523	RPL13A
Metabolism of vitamins and cofactors_Homo sapiens_R-HSA-196854	1/148	0.289689	0.301069	0.414238	0.432055	2.47905	-3.07142	GPC1
G2/M Checkpoints_Homo sapiens_R-HSA-69481	1/150	0.292977	0.303944	0.418464	0.435682	2.63839	-3.23905	UBC
Phospholipid metabolism_Homo sapiens_R-HSA-1483257	1/161	0.310797	0.321857	0.441183	0.458515	2.37673	-2.77749	CPNE3
Separation of Sister Chromatids_Homo sapiens_R-HSA-2467813	1/162	0.312395	0.322937	0.443205	0.459796	2.54723	-2.96368	UBC
Major pathway of rRNA processing in the nucleolus_Homo sapiens_R-HSA-6791226	1/166	0.318751	0.328924	0.451223	0.467281	2.33953	-2.67489	RPL13A
G2/M Transition_Homo sapiens_R-HSA-69275	1/173	0.329736	0.339057	0.464986	0.478977	2.47789	-2.74912	UBC
Mitotic Anaphase_Homo sapiens_R-HSA-68882	1/173	0.329736	0.339057	0.464986	0.478977	2.57539	-2.8573	UBC
Mitotic Metaphase and Anaphase_Homo sapiens_R-HSA-2555396	1/174	0.331291	0.340055	0.466925	0.480124	2.57555	-2.84536	UBC
Mitotic G2-G2/M phases_Homo sapiens_R-HSA-453274	1/175	0.332842	0.341046	0.468857	0.48126	2.47345	-2.72101	UBC
rRNA processing_Homo sapiens_R-HSA-72312	1/180	0.340547	0.348328	0.478415	0.490207	2.38465	-2.56875	RPL13A
Cell Cycle Checkpoints_Homo sapiens_R-HSA-69620	1/182	0.343605	0.350839	0.482191	0.493208	2.68757	-2.87103	UBC
Ion channel transport_Homo sapiens_R-HSA-983712	1/203	0.374883	0.382105	0.520278	0.531231	2.55446	-2.50628	UBC
Transmission across Chemical Synapses_Homo sapiens_R-HSA-112315	1/211	0.386411	0.393167	0.534061	0.544349	2.56194	-2.43602	VAMP2
Fatty acid, triacylglycerol, and ketone body metabolism_Homo sapiens_R-HSA-535734	1/217	0.394921	0.401124	0.544146	0.553659	2.44189	-2.26869	SCD
Transmembrane transport of small molecules_Homo sapiens_R-HSA-382551	2/594	0.398497	0.404051	0.63521	0.641827	2.41457	-2.22154	UBC;ABCG1
Chromatin modifying enzymes_Homo sapiens_R-HSA-3247509	1/226	0.407469	0.411713	0.558877	0.566667	2.44464	-2.19477	HIST2H2AA3
Chromatin organization_Homo sapiens_R-HSA-4839726	1/226	0.407469	0.411713	0.558877	0.566667	2.45401	-2.20319	HIST2H2AA3
Antigen processing: Ubiquitination & Proteasome degradation_Homo sapiens_R-HSA-983168	1/260	0.452615	0.456538	0.61048	0.617912	2.49455	-1.97746	UBC
DNA Repair_Homo sapiens_R-HSA-73894	1/285	0.483647	0.486994	0.64464	0.650226	2.50202	-1.81747	UBC
Neuronal System_Homo sapiens_R-HSA-112316	1/301	0.502597	0.505201	0.66496	0.669562	2.48877	-1.71219	VAMP2
Metabolism of amino acids and derivatives_Homo sapiens_R-HSA-71291	1/335	0.540634	0.542499	0.704471	0.7069	2.45122	-1.50753	RPL13A
Signaling by GPCR_Homo sapiens_R-HSA-372790	3/1293	0.578551	0.579546	0.859197	0.860676	2.5659	-1.40414	AKT3;UBC;GRB2
GPCR downstream signaling_Homo sapiens_R-HSA-388396	2/983	0.667843	0.667843	0.879397	0.879397	2.40519	-0.97098	AKT3;GRB2

## Sheet: Exosome cellular component
Term	Overlap	P-value	Adjusted P-value	Old P-value	Old Adjusted P-value	Z-score	Combined Score	Genes
focal adhesion (GO:0005925)	10/357	6.66971e-09	6.06943e-07	1.56919e-07	1.42797e-05	-1.13218	21.314	EFNB2;PDCD6IP;CD81;CD9;RPL13A;CTNNB1;CPNE3;B2M;HSPA1B;EPHA2
multivesicular body (GO:0005771)	2019-03-30	4.42603e-05	0.00201385	0.000170809	0.00777181	-1.74265	17.4708	CD63;TSG101;TPT1
nuclear euchromatin (GO:0005719)	2019-02-19	0.000863184	0.0232409	0.00217414	0.0646047	-2.59776	18.3269	TBP;CTNNB1
euchromatin (GO:0000791)	2019-02-22	0.00116095	0.0232409	0.00283977	0.0646047	-2.60494	17.6055	TBP;CTNNB1
endosome lumen (GO:0031904)	2019-02-25	0.00150112	0.0232409	0.00358912	0.0653219	-2.11369	13.7422	CD63;B2M
integral component of plasma membrane (GO:0005887)	10/1464	0.00153237	0.0232409	0.0172228	0.157641	-1.62078	10.5042	EFNB2;EFNB1;CD63;CD81;EPCAM;GPC1;CD9;EPHB1;VAMP2;EPHA2
nuclear chromatin (GO:0000790)	4/254	0.002728	0.031031	0.0100739	0.130961	-1.89762	11.2039	HIST2H2AA3;TBP;H3F3A;CTNNB1
recycling endosome (GO:0055037)	3/120	0.00264958	0.031031	0.00774555	0.117474	-1.23513	7.32849	RAB13;B2M;ABCG1
late endosome (GO:0005770)	3/141	0.00417197	0.0421833	0.011903	0.135397	-1.58186	8.66757	CD63;TSG101;TPT1
azurophil granule membrane (GO:0035577)	1959-02-01	0.00814695	0.0741373	0.0174467	0.157641	-1.76211	8.47595	CD63;CPNE3
multivesicular body membrane (GO:0032585)	2019-01-08	0.0182557	0.084856	0.0296704	0.157641	-3.51434	14.0689	CD63
HFE-transferrin receptor complex (GO:1990712)	2019-01-09	0.0205146	0.084856	0.0329142	0.157641	-3.55899	13.8324	B2M
insulin-responsive compartment (GO:0032593)	2019-01-08	0.0182557	0.084856	0.0296704	0.157641	-3.09996	12.41	RAB13
clathrin-sculpted gamma-aminobutyric acid transport vesicle membrane (GO:0061202)	2019-01-09	0.0205146	0.084856	0.0329142	0.157641	-3.13045	12.1669	VAMP2
platelet dense granule membrane (GO:0031088)	2019-01-07	0.0159917	0.084856	0.0264161	0.157641	-2.83738	11.7345	CD63
clathrin-sculpted gamma-aminobutyric acid transport vesicle (GO:0061200)	2019-01-09	0.0205146	0.084856	0.0329142	0.157641	-2.9932	11.6334	VAMP2
early endosome (GO:0005769)	3/223	0.0145982	0.084856	0.0386495	0.167481	-1.65908	7.01269	TSG101;B2M;EPHB1
early endosome membrane (GO:0031901)	1974-02-01	0.0125834	0.084856	0.0263479	0.157641	-1.51833	6.64326	B2M;EPHB1
clathrin-coated vesicle membrane (GO:0030665)	1982-02-01	0.0152933	0.084856	0.0317044	0.157641	-1.42991	5.97751	CD9;VAMP2
bicellular tight junction (GO:0005923)	1973-02-01	0.0122611	0.084856	0.0257072	0.157641	-1.31896	5.80515	EPCAM;RAB13
cytoplasmic vesicle (GO:0031410)	3/216	0.0134086	0.084856	0.035702	0.162444	-1.25104	5.39433	CD63;RAB13;VAMP2
nucleolus (GO:0005730)	5/677	0.019117	0.084856	0.0726219	0.232652	-1.31388	5.19924	TSG101;SCD;RPL13A;CPNE3;GRB2
clathrin-coated vesicle (GO:0030136)	2/101	0.0226241	0.0895129	0.0459577	0.181833	-1.48587	5.62957	RAB13;VAMP2
beta-catenin-TCF complex (GO:1990907)	2019-01-12	0.0272609	0.103364	0.0425827	0.176138	-2.2087	7.95639	CTNNB1
nuclear nucleosome (GO:0000788)	2019-01-14	0.0317332	0.106953	0.0489765	0.185703	-2.24326	7.74013	H3F3A
chromatin (GO:0000785)	3/297	0.0307786	0.106953	0.0770472	0.23371	-1.35428	4.71418	HIST2H2AA3;TBP;TP73
lysosomal membrane (GO:0005765)	3/292	0.0294767	0.106953	0.0740554	0.232652	-1.13604	4.00356	SCARB1;CD63;CPNE3
trans-Golgi network transport vesicle (GO:0030140)	2019-01-16	0.0361853	0.117602	0.0553291	0.201398	-1.48038	4.91352	RAB13
platelet alpha granule membrane (GO:0031092)	2019-01-18	0.0406174	0.127455	0.0616406	0.215742	-1.95907	6.27601	CD9
RNA polymerase II transcription factor complex (GO:0090575)	2/148	0.0455429	0.138147	0.0888818	0.252758	-1.65295	5.10612	TBP;CTNNB1
platelet dense granule (GO:0042827)	2019-01-22	0.0494219	0.140677	0.0741419	0.232652	-1.95538	5.88052	CD63
azurophil granule (GO:0042582)	2/155	0.049469	0.140677	0.0960351	0.257035	-1.14778	3.4507	CD63;CPNE3
endoplasmic reticulum exit site (GO:0070971)	2019-01-25	0.0559733	0.150808	0.0834121	0.244855	-1.68924	4.86988	PDCD6IP
perinuclear region of cytoplasm (GO:0048471)	3/379	0.056346	0.150808	0.133237	0.298024	-1.27431	3.66524	CTNNB1;VAMP2;HSPA1B
nuclear chromosome part (GO:0044454)	3/393	0.0614793	0.159846	0.144017	0.312036	-0.934567	2.60656	HIST2H2AA3;TBP;H3F3A
catenin complex (GO:0016342)	2019-01-29	0.0646399	0.163395	0.0956331	0.257035	-1.45208	3.97713	CTNNB1
trans-Golgi network (GO:0005802)	2/186	0.0682199	0.167784	0.129529	0.298024	-1.08114	2.90287	RAB13;VAMP2
endosomal part (GO:0044440)	1932-01-01	0.0710887	0.170239	0.104695	0.272208	-1.47371	3.89623	CD63
lysosome (GO:0005764)	3/423	0.0731908	0.170779	0.16808	0.315611	-0.870391	2.2758	SCARB1;CD63;GPC1
clathrin-coated endocytic vesicle membrane (GO:0030669)	1934-01-01	0.0753637	0.171452	0.110688	0.279795	-1.73142	4.47646	CD9
transcription factor TFIID complex (GO:0005669)	1936-01-01	0.0796195	0.176716	0.116642	0.286877	-1.35709	3.4341	TBP
phagocytic vesicle membrane (GO:0030670)	1939-01-01	0.0859672	0.186262	0.125501	0.298024	-1.33341	3.27191	B2M
aggresome (GO:0016235)	1942-01-01	0.0922721	0.195274	0.134274	0.298024	-1.36088	3.243	HSPA1B
late endosome membrane (GO:0031902)	1949-01-01	0.106819	0.20251	0.154416	0.312263	-1.33743	2.99132	CD63
recycling endosome membrane (GO:0055038)	1948-01-01	0.104755	0.20251	0.151566	0.312263	-1.175	2.65096	B2M
actomyosin (GO:0042641)	1949-01-01	0.106819	0.20251	0.154416	0.312263	-1.07158	2.39671	PDCD6IP
Golgi subcompartment (GO:0098791)	3/480	0.0979537	0.20251	0.216802	0.345321	-0.955378	2.21959	RAB13;B2M;VAMP2
lytic vacuole membrane (GO:0098852)	2/234	0.100968	0.20251	0.185715	0.318869	-0.913901	2.09553	SCARB1;CD63
clathrin-coated endocytic vesicle (GO:0045334)	1951-01-01	0.110933	0.206018	0.160087	0.315611	-1.19108	2.61898	CD9
nuclear chromosome (GO:0000228)	1953-01-01	0.115028	0.209351	0.165721	0.315611	-1.48909	3.22027	H3F3A
tertiary granule lumen (GO:1904724)	1956-01-01	0.121137	0.21147	0.174105	0.315611	-1.25372	2.6464	B2M
ER to Golgi transport vesicle membrane (GO:0012507)	1955-01-01	0.119105	0.21147	0.171319	0.315611	-1.16129	2.47093	B2M
caveola (GO:0005901)	1957-01-01	0.123164	0.21147	0.176881	0.315611	-1.0962	2.2957	SCARB1
Golgi-associated vesicle (GO:0005798)	1959-01-01	0.127204	0.214363	0.182406	0.318869	-1.12531	2.32034	RAB13
specific granule lumen (GO:0035580)	1963-01-01	0.135231	0.223745	0.19335	0.325831	-1.19395	2.38883	B2M
cytosolic large ribosomal subunit (GO:0022625)	1970-01-01	0.149103	0.242293	0.212163	0.345321	-1.27947	2.43498	RPL13A
coated vesicle (GO:0030135)	1972-01-01	0.153027	0.243161	0.217459	0.345321	-1.03091	1.93516	VAMP2
large ribosomal subunit (GO:0015934)	1973-01-01	0.154982	0.243161	0.220095	0.345321	-1.03327	1.92647	RPL13A
ribosome (GO:0005840)	1977-01-01	0.162758	0.24685	0.230551	0.349669	-1.2174	2.21017	RPL13A
COPII-coated ER to Golgi transport vesicle (GO:0030134)	1976-01-01	0.160821	0.24685	0.22795	0.349669	-1.10754	2.02399	B2M
phagocytic vesicle (GO:0045335)	1984-01-01	0.176198	0.262853	0.248525	0.37075	-1.0217	1.77382	B2M
lysosomal lumen (GO:0043202)	1987-01-01	0.181894	0.266973	0.256103	0.375893	-1.12185	1.912	GPC1
platelet alpha granule (GO:0031091)	1991-01-01	0.189428	0.269342	0.266093	0.37835	-1.03706	1.7254	CD9
DNA-directed RNA polymerase II, holoenzyme (GO:0016591)	1991-01-01	0.189428	0.269342	0.266093	0.37835	-0.971967	1.61711	TBP
chromosome (GO:0005694)	1998-01-01	0.202449	0.277472	0.283264	0.38802	-1.00625	1.60726	H3F3A
centriole (GO:0005814)	1996-01-01	0.198749	0.277472	0.278398	0.38802	-0.965384	1.55978	HSPA1B
Golgi lumen (GO:0005796)	1999-01-01	0.204292	0.277472	0.285685	0.38802	-0.822505	1.30631	GPC1
nuclear chromosome, telomeric region (GO:0000784)	1/108	0.220696	0.29344	0.307123	0.408136	-0.868319	1.312	H3F3A
endocytic vesicle (GO:0030139)	1/109	0.222498	0.29344	0.309466	0.408136	-0.763721	1.14775	RAB13
mitochondrial outer membrane (GO:0005741)	1/116	0.235	0.3055	0.325656	0.423352	-0.873606	1.26513	UBC
ficolin-1-rich granule lumen (GO:1904813)	1/124	0.249046	0.308397	0.34371	0.425102	-0.946827	1.3162	HSPA1B
membrane raft (GO:0045121)	1/120	0.242055	0.308397	0.334742	0.425102	-0.870085	1.2343	GPC1
cytosolic ribosome (GO:0022626)	1/125	0.250784	0.308397	0.345933	0.425102	-0.845315	1.16921	RPL13A
chromosome, telomeric region (GO:0000781)	1/125	0.250784	0.308397	0.345933	0.425102	-0.743027	1.02773	H3F3A
microtubule organizing center part (GO:0044450)	1/127	0.254248	0.308488	0.350359	0.425102	-0.803592	1.10047	HSPA1B
centrosome (GO:0005813)	2/462	0.287527	0.344276	0.463849	0.524464	-0.618093	0.770415	CTNNB1;HSPA1B
vacuolar lumen (GO:0005775)	1/162	0.312395	0.359847	0.423283	0.493831	-0.84581	0.98409	GPC1
cytosolic part (GO:0044445)	1/160	0.309195	0.359847	0.419338	0.493831	-0.79276	0.930528	RPL13A
specific granule (GO:0042581)	1/161	0.310797	0.359847	0.421314	0.493831	-0.786095	0.918643	B2M
tertiary granule (GO:0070820)	1/165	0.317167	0.360778	0.429152	0.49434	-0.763832	0.877128	B2M
microtubule organizing center (GO:0005815)	2/508	0.326758	0.367098	0.514674	0.571163	-0.702822	0.786132	CTNNB1;HSPA1B
ficolin-1-rich granule (GO:0101002)	1/185	0.348165	0.386378	0.466831	0.524464	-0.677834	0.715168	HSPA1B
mitochondrion (GO:0005739)	3/1027	0.422943	0.463708	0.685522	0.717041	-0.512973	0.441423	CPNE3;ABCG1;HSPA1B
endoplasmic reticulum lumen (GO:0005788)	1/271	0.466488	0.505362	0.603223	0.661365	-0.45481	0.346804	B2M
actin cytoskeleton (GO:0015629)	1/295	0.495572	0.526873	0.634825	0.682335	-0.535395	0.375871	PDCD6IP
nuclear speck (GO:0016607)	1/297	0.497924	0.526873	0.637345	0.682335	-0.517373	0.360768	HSPA1B
secretory granule lumen (GO:0034774)	1/318	0.521986	0.545985	0.66282	0.701356	-0.636271	0.413649	B2M
nucleoplasm part (GO:0044451)	1/408	0.612943	0.633839	0.753741	0.779437	-0.51403	0.251609	TBP
Golgi membrane (GO:0000139)	1/443	0.643538	0.658	0.78227	0.799849	-0.334191	0.147303	B2M
cytoskeleton (GO:0005856)	1/521	0.703459	0.711275	0.834832	0.844108	-0.332365	0.116908	TNIK
nuclear body (GO:0016604)	1/619	0.764925	0.764925	0.883714	0.883714	-0.369856	0.0991128	HSPA1B

[truncated: 2 more sheets: Exosome biological process, Exosome molecular function]
